# Supplementary material for: Characterizing the optimal flux space of genome-scale metabolic reconstructions through modified latin-hypercube sampling
Source: Royal Society of Chemistry journal article supplement (doi:10.1039/c5mb00457h), 2016-01-11
Supplement: c5mb00457h3.xlsx [file c5mb00457h3.xlsx]

## Sheet: iMO1086
S.No	Reaction name	Type III pathway number	Reactions fixed/blocked with each loop	Coupled Set number	Min_fva	Max_fva	Variability_fva	Zero_fva	Min_data	Max_data	Variability data	Zero_data	PC_number
1	RR10392	3, 5, 6, 10	8	0	0	0	No	Yes	0	0	No	Yes	0
2	RR10368	0	0	0	-2.58317e-16	-2.58317e-16	No	Yes	0	0	No	Yes	0
3	RR10310	0	0	0	0	0	No	Yes	0	0	No	Yes	0
4	RR10080	0	0	56	-2.51703e-05	0	No	No	0	0	No	Yes	0
5	RR10079	14	7	11	-1.70618e-05	0	No	No	0	0	No	Yes	0
6	RR10077	0	0	0	-6.35551e-05	0	No	No	0	3.762	Yes	No	0
7	RR10073	0	0	3	0	0.000317775	Yes	No	0	0	No	Yes	0
8	RR10072	14	7	0	0	0	No	Yes	0	0	No	Yes	0
9	RR10070	0	0	57	-2.30064e-05	0	No	No	0	0	No	Yes	0
10	RR10068	0	0	34	-0.0012711	0	Yes	No	0	0	No	Yes	0
11	RR10052	0	0	0	0	0	No	Yes	0	0	No	Yes	0
12	RR10046	0	0	0	0	0	No	Yes	0	0	No	Yes	0
13	RR10037	0	0	5	-1.14514e-05	0	No	No	0	0	No	Yes	0
14	RR10028	0	0	46	0	0	No	Yes	0	0	No	Yes	0
15	RR10027	0	0	7	-0.0365683	-0.0365682	No	No	-0.036568	-0.036568	No	No	0
16	RR10009	0	0	0	0	0	No	Yes	0	0	No	Yes	0
17	RR09997	0	0	2	0	3.6737e-06	No	No	0	0	No	Yes	0
18	RR09977	0	0	79	0	0	No	Yes	0	0	No	Yes	0
19	RR09957	0	0	15	0	1.46273e-06	No	No	0	1.4602e-06	No	No	0
20	RR09953	0	0	1	0	0	No	Yes	0	0	No	Yes	0
21	RR09945	0	0	15	0	1.46273e-06	No	No	0	1.4602e-06	No	No	0
22	RR09929	0	0	0	0	0	No	Yes	0	0	No	Yes	0
23	RR09928	0	0	70	0	6.39689e-25	No	Yes	0	0	No	Yes	0
24	RR09921	0	0	0	0	0	No	Yes	0	0	No	Yes	0
25	RR09911	0	0	0	0.363246	0.363247	No	No	0.36325	0.36325	No	No	0
26	RR09910	0	0	0	0	0	No	Yes	0	0	No	Yes	0
27	RR09900	0	0	0	0	0	No	Yes	0	0	No	Yes	0
28	RR09898	0	0	0	0	0	No	Yes	0	0	No	Yes	0
29	RR09897	0	0	0	0	0	No	Yes	0	0	No	Yes	0
30	RR09896	0	0	48	-9.96942e-06	0	No	No	0	0	No	Yes	0
31	RR09741	0	0	0	0	0.00025422	Yes	No	0	0	No	Yes	0
32	RR09735	0	0	64	0	0	No	Yes	0	0	No	Yes	0
33	RR09730	0	0	69	-0.201359	-0.201037	Yes	No	-0.20136	-0.20136	No	No	0
34	RR09715	0	0	1	0	0	No	Yes	0	0	No	Yes	0
35	RR09712	0	0	1	0	0	No	Yes	0	0	No	Yes	0
36	RR09683	0	0	7	0.142083	0.142083	No	No	0.14208	0.14208	No	No	0
37	RR08939	0	0	0	-0.146528	-0.146525	No	No	-0.14653	-0.14653	No	No	0
38	RR08916	0	0	0	-12.2439	3.79389	Yes	No	-11.895	3.7936	Yes	No	2, 5, 6, 7
39	RR08891	0	0	0	0	0	No	Yes	0	0	No	Yes	0
40	RR08885	0	0	7	0.0201857	0.0201857	No	No	0.020186	0.020186	No	No	0
41	RR08879	0	0	0	5.25352	5.25384	Yes	No	5.2535	5.2536	Yes	No	0
42	RR08868	0	0	71	-0.000423701	0	Yes	No	0	0	No	Yes	0
43	RR08847	0	0	18	-7.68037e-06	0	No	No	0	0	No	Yes	0
44	RR08845	0	0	0	0	0	No	Yes	0	0	No	Yes	0
45	RR08843	0	0	76	-5.89838e-06	0	No	No	0	0	No	Yes	0
46	RR08834	0	0	80	-3.02643e-05	0	No	No	0	0	No	Yes	0
47	RR08819	0	0	0	-0.000423701	0	Yes	No	0	0	No	Yes	0
48	RR08812	0	0	0	0.668323	0.668749	Yes	No	0.66875	0.66875	No	No	0
49	RR08763	0	0	38	-1.92591e-05	0	No	No	0	0	No	Yes	0
50	RR08749	13	4	0	-0.000423701	0	Yes	No	0	0	No	Yes	0
51	RR08748	0	0	0	-0.000423701	0	Yes	No	0	0	No	Yes	0
52	RR08739	0	0	55	0	2.23e-05	No	No	0	4.804e-06	No	No	0
53	RR08734	0	0	0	-0.000423701	0	Yes	No	0	0	No	Yes	0
54	RR08702	0	0	61	-2.79363e-05	0	No	No	0	0	No	Yes	0
55	RR08696	13	6	0	0	0	No	Yes	0	0	No	Yes	0
56	RR08685	0	0	78	-7.34741e-06	0	No	No	0	0	No	Yes	0
57	RR08678	0	0	53	7.86374	7.86387	Yes	No	0.33976	7.8638	Yes	No	0
58	RR08674	0	0	0	-58.5204	-58.5198	Yes	No	-58.52	-54.758	Yes	No	0
59	RR08672	0	0	47	-30.1256	-30.1255	Yes	No	-33.888	-30.126	Yes	No	0
60	RR08670	0	0	75	28.8847	28.8848	No	No	28.885	28.885	No	No	0
61	RR08668	0	0	22	-3.345e-05	0	No	No	0	0	No	Yes	0
62	RR08664	0	0	36	-4.79661e-05	0	No	No	0	0	No	Yes	0
63	RR08646	0	0	17	-1.99388e-05	0	No	No	0	0	No	Yes	0
64	RR08636	0	0	51	-2.03376e-05	0	No	No	0	0	No	Yes	0
65	RR08615	0	0	0	0	6.38713e-25	No	Yes	0	0	No	Yes	0
66	RR08613	0	0	67	-2.25974e-05	0	No	No	0	0	No	Yes	0
67	RR08593	0	0	0	97.9771	97.9776	Yes	No	97.977	97.977	No	No	0
68	RR04371	0	0	0	0	0	No	Yes	0	0	No	Yes	0
69	RR04368	0	0	0	9.09726	9.09794	Yes	No	9.0974	9.0976	Yes	No	0
70	RR04316	0	0	4	1.20756	1.20787	Yes	No	1.2076	1.2076	No	No	0
71	RR04305	1, 2, 3, 7	5	0	0	0	No	Yes	0	0	No	Yes	0
72	RR04302	0	0	31	0.170451	0.170457	No	No	0.17045	0.17045	No	No	0
73	RR04241	0	0	28	0.025592	0.0256201	No	No	0.025598	0.025598	No	No	0
74	RR04185	0	0	27	0.607076	0.607246	Yes	No	0.60708	0.60708	No	No	0
75	RR04183	0	0	74	0	0.00016948	Yes	No	0	0	No	Yes	0
76	RR04170	0	0	0	0	0	No	Yes	0	0	No	Yes	0
77	RR04152	0	0	0	0	0	No	Yes	0	0	No	Yes	0
78	RR04097	0	0	1	0	0	No	Yes	0	0	No	Yes	0
79	RR04095	0	0	1	0	0	No	Yes	0	0	No	Yes	0
80	RR04094	0	0	1	0	0	No	Yes	0	0	No	Yes	0
81	RR04093	0	0	1	0	0	No	Yes	0	0	No	Yes	0
82	RR04092	0	0	1	0	0	No	Yes	0	0	No	Yes	0
83	RR04091	0	0	1	0	0	No	Yes	0	0	No	Yes	0
84	RR04090	0	0	1	0	0	No	Yes	0	0	No	Yes	0
85	RR04089	0	0	1	0	0	No	Yes	0	0	No	Yes	0
86	RR04088	0	0	1	0	0	No	Yes	0	0	No	Yes	0
87	RR04087	0	0	1	0	0	No	Yes	0	0	No	Yes	0
88	RR04086	0	0	1	0	0	No	Yes	0	0	No	Yes	0
89	RR04085	0	0	0	0	0	No	Yes	0	0	No	Yes	0
90	RR04084	0	0	0	0	0	No	Yes	0	0	No	Yes	0
91	RR04081	0	0	0	0	0	No	Yes	0	0	No	Yes	0
92	RR04012	0	0	16	-0.258666	-0.258611	No	No	-0.25861	-0.25861	No	No	0
93	RR03900	0	0	0	0	0	No	Yes	0	0	No	Yes	0
94	RR03894	0	0	7	4.31505e-05	4.31506e-05	No	No	4.3151e-05	4.3151e-05	No	No	0
95	RR03886	0	0	0	-5.52653e-05	0	No	No	0	0	No	Yes	0
96	RR03873	0	0	7	0.00199663	0.00199663	No	No	0.0019966	0.0019966	No	No	0
97	RR03822	0	0	58	-0.743598	-0.743506	No	No	-0.74351	-0.74351	No	No	0
98	RR03815	0	0	0	-0.201359	-0.201037	Yes	No	-0.20136	-0.20136	No	No	0
99	RR03774	0	0	42	6.41078e-25	0.000158888	Yes	No	0	0	No	Yes	0
100	RR03769	0	0	0	0.137423	0.137452	No	No	0.13744	0.13744	No	No	0
101	RR03757	0	0	0	-5.52653e-05	4.53965e-05	Yes	No	0	0	No	Yes	0
102	RR03698	0	0	0	0	0	No	Yes	0	0	No	Yes	0
103	RR03692	0	0	12	-0.0126813	-0.0126804	No	No	-0.01268	-0.01268	No	No	0
104	RR03691	0	0	0	-0.588175	-0.588147	No	No	-0.58815	-0.58815	No	No	0
105	RR03681	0	0	45	-7.5756	-7.57492	Yes	No	-7.5752	-7.5752	No	No	0
106	RR03676	0	0	49	1.10487	1.10555	Yes	No	1.1052	1.1052	No	No	0
107	RR03675	0	0	21	-8.68047	-8.68015	Yes	No	-8.6805	-8.6803	Yes	No	0
108	RR03664	0	0	0	0	0	No	Yes	0	0	No	Yes	0
109	RR03658	1, 4, 6, 8	1	0	-0.294009	-0.294009	No	No	-0.29401	-0.29401	No	No	0
110	RR03649	0	0	0	0.205514	0.205577	No	No	0.20551	0.20551	No	No	0
111	RR03641	0	0	0	0	0	No	Yes	0	0	No	Yes	0
112	RR03636	0	0	0	-5.52653e-05	2.58317e-16	No	Yes	0	0	No	Yes	0
113	RR03618	0	0	77	-3.75615e-29	3.88123e-05	No	Yes	0	0	No	Yes	0
114	RR03591	0	0	0	-6.94155	0.0180647	Yes	No	-6.9412	0.018008	Yes	No	4, 5, 7
115	RR03588	0	0	0	-0.000105925	0.203656	Yes	No	0	0.20362	Yes	No	0
116	RR03555	0	0	0	0	0	No	Yes	0	0	No	Yes	0
117	RR03551	0	0	0	0.201037	0.201359	Yes	No	0.20136	0.20136	No	No	0
118	RR03546	0	0	32	-0.119777	-0.0123626	Yes	No	-0.11946	-0.01268	Yes	No	0
119	RR03514	0	0	0	-7.7495e-16	-7.7495e-16	No	Yes	0	0	No	Yes	0
120	RR03512	0	0	0	-0.0257567	-0.025592	Yes	No	-0.025598	-0.025598	No	No	0
121	RR03500	0	0	68	0.0255978	0.0256201	No	No	0.025598	0.025598	No	No	0
122	RR03487	0	0	12	0.0063402	0.00634064	No	No	0.0063402	0.0063402	No	No	0
123	RR03255	0	0	0	0	0	No	Yes	0	0	No	Yes	0
124	RR03227	0	0	0	-1.80822e-15	-1.80822e-15	No	Yes	0	0	No	Yes	0
125	RR03164	0	0	0	0	0	No	Yes	0	0	No	Yes	0
126	RR03162	0	0	0	0	0	No	Yes	0	0	No	Yes	0
127	RR03160	0	0	0	0	0	No	Yes	0	0	No	Yes	0
128	RR03159	0	0	0	0	0	No	Yes	0	0	No	Yes	0
129	RR03047	0	0	0	0	0	No	Yes	0	0	No	Yes	0
130	RR03031	0	0	12	0.0126804	0.0126813	No	No	0.01268	0.01268	No	No	0
131	RR03019	0	0	7	0.0201857	0.0201857	No	No	0.020186	0.020186	No	No	0
132	RR03018	0	0	0	0	0	No	Yes	0	0	No	Yes	0
133	RR03017	0	0	0	0	0	No	Yes	0	0	No	Yes	0
134	RR03016	0	0	0	0.0201857	0.0201879	No	No	0.020186	0.020186	No	No	0
135	RR03001	0	0	59	9.18055	9.18089	Yes	No	9.1806	9.1806	No	No	0
136	RR02690	0	0	0	0	0	No	Yes	0	0	No	Yes	0
137	RR02629	0	0	0	0	0	No	Yes	0	0	No	Yes	0
138	RR02510	0	0	26	0.349526	0.349563	No	No	0.34953	0.34953	No	No	0
139	RR02500	0	0	37	0.415349	0.415388	No	No	0.41535	0.41535	No	No	0
140	RR02499	0	0	26	0.349526	0.349563	No	No	0.34953	0.34953	No	No	0
141	RR02474	0	0	27	-0.607246	-0.607076	Yes	No	-0.60708	-0.60708	No	No	0
142	RR02468	0	0	25	0.313024	0.313135	Yes	No	0.31302	0.31302	No	No	0
143	RR02467	0	0	6	-0.00016948	0	Yes	No	0	0	No	Yes	0
144	RR02464	0	0	28	0.025592	0.0256201	No	No	0.025598	0.025598	No	No	0
145	RR02462	0	0	0	0	0	No	Yes	0	0	No	Yes	0
146	RR02442	0	0	0	0	0	No	Yes	0	0	No	Yes	0
147	RR02406	12	2	0	0.3488	0.349563	Yes	No	0.34953	0.34953	No	No	0
148	RR02374	0	0	39	-1.14514e-05	9.5989e-25	No	Yes	0	0	No	Yes	0
149	RR02347	0	0	0	0	0	No	Yes	0	0	No	Yes	0
150	RR02346	0	0	0	-0.349563	-0.349208	Yes	No	-0.34953	-0.34953	No	No	0
151	RR02342	0	0	52	-6.69001e-05	0	No	No	0	0	No	Yes	0
152	RR02341	0	0	52	0	6.69001e-05	No	No	0	0	No	Yes	0
153	RR02333	0	0	0	0	0	No	Yes	0	0	No	Yes	0
154	RR02327	0	0	50	0	5.52653e-05	No	No	0	0	No	Yes	0
155	RR02325	0	0	49	-1.10555	-1.10487	Yes	No	-1.1052	-1.1052	No	No	0
156	RR02322	0	0	1	0	0	No	Yes	0	0	No	Yes	0
157	RR02311	0	0	0	0	0	No	Yes	0	0	No	Yes	0
158	RR02306	0	0	26	0.349526	0.349563	No	No	0.34953	0.34953	No	No	0
159	RR02299	0	0	0	0	0	No	Yes	0	0	No	Yes	0
160	RR02244	0	0	25	-0.313135	-0.313024	Yes	No	-0.31302	-0.31302	No	No	0
161	RR02237	0	0	0	0	0	No	Yes	0	0	No	Yes	0
162	RR02222	0	0	25	0.313024	0.313135	Yes	No	0.31302	0.31302	No	No	0
163	RR02215	0	0	39	-9.59889e-25	1.14514e-05	No	Yes	0	0	No	Yes	0
164	RR02157	0	0	1	0	0	No	Yes	0	0	No	Yes	0
165	RR02085	0	0	0	0	0	No	Yes	0	0	No	Yes	0
166	RR02032	0	0	0	0	0	No	Yes	0	0	No	Yes	0
167	RR02006	0	0	13	-4.49572e-17	4.53965e-05	No	Yes	0	0	No	Yes	0
168	RR01999	0	0	19	0.300591	0.300646	No	No	0.30059	0.30059	No	No	0
169	RR01988	0	0	73	-0.256868	-0.256709	Yes	No	-0.25671	-0.25671	No	No	0
170	RR01974	0	0	29	0	0.000105925	Yes	No	0	0	No	Yes	0
171	RR01967	0	0	43	-0.019032	-0.0190206	No	No	-0.019021	-0.019021	No	No	0
172	RR01928	0	0	0	0	0	No	Yes	0	0	No	Yes	0
173	RR01903	0	0	30	0.153587	0.15395	Yes	No	0.15359	0.15359	No	No	0
174	RR01902	0	0	54	-0.153904	-0.153587	Yes	No	-0.15359	-0.15359	No	No	0
175	RR01898	0	0	13	-4.53965e-05	4.49572e-17	No	Yes	0	0	No	Yes	0
176	RR01895	0	0	0	0	0	No	Yes	0	0	No	Yes	0
177	RR01873	0	0	69	0.201037	0.201359	Yes	No	0.20136	0.20136	No	No	0
178	RR01849	0	0	8	-0.0658617	-0.0658229	No	No	-0.065823	-0.065823	No	No	0
179	RR01841	0	0	0	0	0	No	Yes	0	0	No	Yes	0
180	RR01805	0	0	0	0	0	No	Yes	0	0	No	Yes	0
181	RR01798	0	0	52	0	6.69001e-05	No	No	0	0	No	Yes	0
182	RR01747	0	0	40	0.300591	0.300636	No	No	0.30059	0.30059	No	No	0
183	RR01726	0	0	14	-4.49572e-17	4.53965e-05	No	Yes	0	0	No	Yes	0
184	RR01725	0	0	14	-4.49572e-17	4.53965e-05	No	Yes	0	0	No	Yes	0
185	RR01695	0	0	0	0	0	No	Yes	0	0	No	Yes	0
186	RR01631	0	0	0	0	0	No	Yes	0	0	No	Yes	0
187	RR01607	0	0	12	-0.00634064	-0.0063402	No	No	-0.0063402	-0.0063402	No	No	0
188	RR01593	0	0	0	0	0	No	Yes	0	0	No	Yes	0
189	RR01583	0	0	16	0.258611	0.258666	No	No	0.25861	0.25861	No	No	0
190	RR01486	0	0	0	-0.0038031	7.95407e-28	Yes	No	-0.0038031	0	Yes	No	0
191	RR01452	0	0	0	0	0	No	Yes	0	0	No	Yes	0
192	RR01408	0	0	7	-4.31506e-05	-4.31505e-05	No	No	-4.3151e-05	-4.3151e-05	No	No	0
193	RR01358	0	0	19	-0.300646	-0.300591	No	No	-0.30059	-0.30059	No	No	0
194	RR01300	0	0	0	0	0	No	Yes	0	0	No	Yes	0
195	RR01295	0	0	0	-0.0180647	0.000158888	Yes	No	-0.018065	-7.1935e-05	Yes	No	0
196	RR01292	0	0	12	0.0063402	0.00634064	No	No	0.0063402	0.0063402	No	No	0
197	RR01290	0	0	72	0	0.0187356	Yes	No	0	0.01851	Yes	No	0
198	RR01284	0	0	50	0	5.52653e-05	No	No	0	0	No	Yes	0
199	RR01275	0	0	0	0	0	No	Yes	0	0	No	Yes	0
200	RR01272	0	0	73	-0.256868	-0.256709	Yes	No	-0.25671	-0.25671	No	No	0
201	RR01271	0	0	0	0.256391	0.256868	Yes	No	0.25671	0.25671	No	No	0
202	RR01261	0	0	0	0	0	No	Yes	0	0	No	Yes	0
203	RR01237	0	0	0	0	0	No	Yes	0	0	No	Yes	0
204	RR01210	3, 5, 6, 10	8	0	-0.201857	-0.201857	No	No	-0.20186	-0.20186	No	No	0
205	RR01180	0	0	0	-0.203725	3.71125e-05	Yes	No	-0.20362	0	Yes	No	0
206	RR01155	0	0	0	-0.0180647	-0.0179058	Yes	No	-0.018065	-0.018065	No	No	0
207	RR01151	0	0	7	0.0180647	0.0180647	No	No	0.018065	0.018065	No	No	0
208	RR01150	0	0	0	0.0244049	0.0244054	No	No	0.024405	0.024405	No	No	0
209	RR01147	0	0	0	0	0	No	Yes	0	0	No	Yes	0
210	RR01142	0	0	63	-0.000110531	-2.41416e-17	Yes	No	0	0	No	Yes	0
211	RR01123	0	0	20	-0.0530585	-0.0530518	No	No	-0.053052	-0.053052	No	No	0
212	RR01103	0	0	35	-0.230473	-0.230453	No	No	-0.23045	-0.23045	No	No	0
213	RR01100	0	0	0	0	0	No	Yes	0	0	No	Yes	0
214	RR01071	0	0	66	-9.92869	-9.92804	Yes	No	-9.9283	-9.9283	No	No	0
215	RR01070	0	0	0	0	0	No	Yes	0	0	No	Yes	0
216	RR01048	0	0	35	-0.230473	-0.230453	No	No	-0.23045	-0.23045	No	No	0
217	RR01038	0	0	0	-6.94155	0.0185767	Yes	No	-6.9408	0.018577	Yes	No	4, 5, 7
218	RR01018	0	0	0	-0.150132	-0.150103	No	No	-0.15012	-0.15012	No	No	0
219	RR01016	0	0	0	0	0	No	Yes	0	0	No	Yes	0
220	RR01014	0	0	23	0.0190206	0.0190329	No	No	0.019021	0.019021	No	No	0
221	RR00989	0	0	65	0	0.106785	Yes	No	0	0.10678	Yes	No	0
222	RR00988	0	0	0	-0.484987	-0.484895	No	No	-0.4849	-0.4849	No	No	0
223	RR00952	0	0	0	0	0	No	Yes	0	0	No	Yes	0
224	RR00942	0	0	0	0	0	No	Yes	0	0	No	Yes	0
225	RR00941	0	0	0	0	0	No	Yes	0	0	No	Yes	0
226	RR00910	0	0	0	0	0	No	Yes	0	0	No	Yes	0
227	RR00902	12	2	0	0.774387	0.775679	Yes	No	0.77511	0.77512	No	No	0
228	RR00875	0	0	0	0	0	No	Yes	0	0	No	Yes	0
229	RR00833	0	0	0	0	0	No	Yes	0	0	No	Yes	0
230	RR00827	0	0	0	0	0	No	Yes	0	0	No	Yes	0
231	RR00818	0	0	66	9.92804	9.92869	Yes	No	9.9283	9.9283	No	No	0
232	RR00812	0	0	0	0	0	No	Yes	0	0	No	Yes	0
233	RR00779	0	0	0	-0.000105925	0.000105925	Yes	No	0	0	No	Yes	0
234	RR00772	0	0	0	0.0803313	0.0809769	Yes	No	0.080694	0.080695	No	No	0
235	RR00771	0	0	0	0.774387	0.775679	Yes	No	0.77511	0.77512	No	No	0
236	RR00767	1, 4, 6, 8	1	0	0	0	No	Yes	0	0	No	Yes	0
237	RR00739	0	0	1	0	0	No	Yes	0	0	No	Yes	0
238	RR00710	2, 4, 5, 9	9	0	5.47227	5.473	Yes	No	5.4726	5.4726	No	No	0
239	RR00708	2, 4, 5, 9	9	0	-5.78602	-5.78529	Yes	No	-5.7857	-5.7857	No	No	0
240	RR00706	0	0	24	0.205514	0.205672	Yes	No	0.20551	0.20551	No	No	0
241	RR00704	0	0	33	0.211729	0.211809	No	No	0.21173	0.21173	No	No	0
242	RR00703	7, 8, 9, 10	9	0	-9.86272	-9.86207	Yes	No	-9.8623	-9.8623	No	No	0
243	RR00695	0	0	10	-0.0395361	-0.0394937	No	No	-0.039494	-0.039494	No	No	0
244	RR00693	0	0	8	-0.0658617	-0.0658229	No	No	-0.065823	-0.065823	No	No	0
245	RR00690	0	0	0	-0.000317775	0.0038031	Yes	No	0	0.0038031	Yes	No	0
246	RR00689	0	0	0	0.450709	0.45074	No	No	0.45071	0.45071	No	No	0
247	RR00685	0	0	21	8.68015	8.68047	Yes	No	8.6803	8.6805	Yes	No	0
248	RR00681	0	0	0	-0.575495	-0.575467	No	No	-0.57547	-0.57547	No	No	0
249	RR00674	0	0	0	0.71289	0.713049	Yes	No	0.71289	0.71289	No	No	0
250	RR00667	0	0	0	-7.95407e-28	0.0038031	Yes	No	0	0.0038031	Yes	No	0
251	RR00652	0	0	0	0.101572	0.105693	Yes	No	0.10157	0.10538	Yes	No	0
252	RR00617	0	0	0	-6.18513e-29	2.03376e-05	No	Yes	0	0	No	Yes	0
253	RR00598	0	0	0	-0.856157	-0.855512	Yes	No	-0.85588	-0.85588	No	No	0
254	RR00595	0	0	0	0	0	No	Yes	0	0	No	Yes	0
255	RR00592	0	0	7	-0.054633	-0.054633	No	No	-0.054633	-0.054633	No	No	0
256	RR00582	0	0	52	-6.69001e-05	0	No	No	0	0	No	Yes	0
257	RR00581	0	0	0	0	0	No	Yes	0	0	No	Yes	0
258	RR00579	0	0	0	0	0	No	Yes	0	0	No	Yes	0
259	RR00563	11	3	0	-0.424167	-0.423486	Yes	No	-0.4238	-0.4238	No	No	0
260	RR00562	11	3	0	-0.424167	-0.423761	Yes	No	-0.4238	-0.4238	No	No	0
261	RR00546	0	0	0	0.0187028	0.0190329	Yes	No	0.019021	0.019021	No	No	0
262	RR00535	0	0	41	0	0	No	Yes	0	0	No	Yes	0
263	RR00529	0	0	31	-0.170457	-0.170451	No	No	-0.17045	-0.17045	No	No	0
264	RR00519	0	0	0	-0.103742	-0.0995753	Yes	No	-0.10338	-0.099575	Yes	No	0
265	RR00511	0	0	9	0	0.000317775	Yes	No	0	0	No	Yes	0
266	RR00508	0	0	0	0	0	No	Yes	0	0	No	Yes	0
267	RR00465	0	0	23	-0.0190329	-0.0190206	No	No	-0.019021	-0.019021	No	No	0
268	RR00464	0	0	0	0.672582	0.672928	Yes	No	0.6729	0.6729	No	No	0
269	RR00448	0	0	0	-48.3906	0	Yes	No	-48.39	0	Yes	No	1
270	RR00446	0	0	0	0	9.24437e-05	No	No	0	0	No	Yes	0
271	RR00438	0	0	4	1.20756	1.20787	Yes	No	1.2076	1.2076	No	No	0
272	RR00432	0	0	0	-0.0958165	-0.0957241	No	No	-0.095809	-0.095809	No	No	0
273	RR00420	0	0	0	0	0	No	Yes	0	0	No	Yes	0
274	RR00417	0	0	44	-0.00016948	0	Yes	No	0	0	No	Yes	0
275	RR00405	0	0	0	0	0	No	Yes	0	0	No	Yes	0
276	RR00397	0	0	60	-0.128805	0	Yes	No	-0.12872	0	Yes	No	0
277	RR00364	0	0	7	0.0201857	0.0201857	No	No	0.020186	0.020186	No	No	0
278	RR00362	0	0	45	7.57492	7.5756	Yes	No	7.5752	7.5752	No	No	0
279	RR00341	0	0	0	0	0	No	Yes	0	0	No	Yes	0
280	RR00311	0	0	0	0.0756449	0.0943813	Yes	No	0.07587	0.094381	Yes	No	0
281	RR00268	0	0	0	0.0943805	0.0943813	No	No	0.094381	0.094381	No	No	0
282	RR00245	0	0	58	0.743506	0.743598	No	No	0.74351	0.74351	No	No	0
283	RR00237	0	0	0	0	0	No	Yes	0	0	No	Yes	0
284	RR00228	0	0	50	0	5.52653e-05	No	No	0	0	No	Yes	0
285	RR00223	0	0	0	0	0	No	Yes	0	0	No	Yes	0
286	RR00221	0	0	0	-0.000317775	0.000110531	Yes	No	0	0	No	Yes	0
287	RR00220	0	0	6	0	0.00016948	Yes	No	0	0	No	Yes	0
288	RR00219	0	0	0	9.0953	9.09595	Yes	No	9.0956	9.0956	No	No	0
289	RR00216	0	0	0	-8.83734	0.365503	Yes	No	-8.837	0.36539	Yes	No	2
290	RR00214	0	0	0	0.0403713	0.0407345	Yes	No	0.040371	0.040371	No	No	0
291	RR00191	7, 8, 9, 10	9	0	-2.20677	-2.07771	Yes	No	-2.2065	-2.0777	Yes	No	0
292	RR00181	0	0	0	-13.8938	2.14402	Yes	No	-13.545	2.1437	Yes	No	2, 5, 6, 7
293	RR00179	7, 8, 9, 10	9	0	9.86199	18.9587	Yes	No	9.8623	18.958	Yes	No	2
294	RR00173	0	0	29	0	0.000105925	Yes	No	0	0	No	Yes	0
295	RR00171	0	0	7	0.203619	0.20362	No	No	0.20362	0.20362	No	No	0
296	RR00170	0	0	0	0.887354	7.8478	Yes	No	0.88773	7.8475	Yes	No	5, 6, 7
297	RR00157	0	0	32	0.0123626	0.119777	Yes	No	0.01268	0.11946	Yes	No	0
298	RR00147	0	0	12	0.0063402	0.00634064	No	No	0.0063402	0.0063402	No	No	0
299	RR00146	0	0	0	0.0275549	0.0275567	No	No	0.027555	0.027555	No	No	0
300	RR00142	0	0	0	0	0	No	Yes	0	0	No	Yes	0
301	RR00131	0	0	0	0.832699	9.92869	Yes	No	0.83274	9.9283	Yes	No	2
302	RR00129	0	0	0	0	0	No	Yes	0	0	No	Yes	0
303	RR00126	0	0	0	0.0201304	0.0201857	No	No	0.020186	0.020186	No	No	0
304	RR00124	11	3	0	0	0	No	Yes	0	0	No	Yes	0
305	RR00111	0	0	0	0.256979	0.256981	No	No	0.25698	0.25698	No	No	0
306	RR00109	0	0	0	0.290801	0.308873	Yes	No	0.29087	0.30887	Yes	No	0
307	RR00099	0	0	0	0	0	No	Yes	0	0	No	Yes	0
308	RR00098	0	0	0	0	0	No	Yes	0	0	No	Yes	0
309	RR00090	0	0	0	0	0	No	Yes	0	0	No	Yes	0
310	RR00082	0	0	62	-0.00016948	0	Yes	No	0	0	No	Yes	0
311	RR00079	1, 2, 3, 7	5	0	5.46073	14.5615	Yes	No	5.4615	14.561	Yes	No	2
312	RR00018	0	0	0	0	0	No	Yes	0	0	No	Yes	0
313	IR10394	0	0	133	0	0	No	Yes	0	0	No	Yes	0
314	IR10391	0	0	0	0	0	No	Yes	0	0	No	Yes	0
315	IR10386	0	0	7	0.0102391	0.0102391	No	No	0.010239	0.010239	No	No	0
316	IR10385	0	0	7	0.0102391	0.0102391	No	No	0.010239	0.010239	No	No	0
317	IR10384	0	0	7	0.167483	0.167483	No	No	0.16748	0.16748	No	No	0
318	IR10383	0	0	7	0.182841	0.182841	No	No	0.18284	0.18284	No	No	0
319	IR10382	0	0	7	0.167483	0.167483	No	No	0.16748	0.16748	No	No	0
320	IR10381	0	0	7	0.000731365	0.000731366	No	No	0.00073137	0.00073137	No	No	0
321	IR10380	0	0	0	0	0	No	Yes	0	0	No	Yes	0
322	IR10379	0	0	0	0	0	No	Yes	0	0	No	Yes	0
323	IR10378	0	0	7	7.31365e-05	7.31366e-05	No	No	7.3137e-05	7.3137e-05	No	No	0
324	IR10376	0	0	0	0	0	No	Yes	0	0	No	Yes	0
325	IR10372	0	0	87	7.31365e-07	7.31366e-07	No	No	7.3137e-07	7.3137e-07	No	No	0
326	IR10371	0	0	0	0	0	No	Yes	0	0	No	Yes	0
327	IR10369	0	0	0	0	0	No	Yes	0	0	No	Yes	0
328	IR10367	0	0	0	0	0.000317775	Yes	No	0	0	No	Yes	0
329	IR10366	0	0	0	0	0.000635551	Yes	No	0	0	No	Yes	0
330	IR10364	0	0	0	0.0063402	0.00634059	No	No	0.0063402	0.0063402	No	No	0
331	IR10363	0	0	126	0	7.3794e-08	No	No	0	0	No	Yes	0
332	IR10362	0	0	0	-3.23514e-20	7.3794e-08	No	Yes	0	0	No	Yes	0
333	IR10361	0	0	83	0	2.21382e-06	No	No	0	0	No	Yes	0
334	IR10360	0	0	83	0	2.21382e-06	No	No	0	0	No	Yes	0
335	IR10359	0	0	83	0	2.21382e-06	No	No	0	0	No	Yes	0
336	IR10358	0	0	83	0	2.21382e-06	No	No	0	0	No	Yes	0
337	IR10357	0	0	83	0	4.42764e-06	No	No	0	0	No	Yes	0
338	IR10356	0	0	83	0	4.42764e-06	No	No	0	0	No	Yes	0
339	IR10355	0	0	83	0	4.42764e-06	No	No	0	0	No	Yes	0
340	IR10354	0	0	83	0	4.42764e-06	No	No	0	0	No	Yes	0
341	IR10352	0	0	83	0	2.21382e-06	No	No	0	0	No	Yes	0
342	IR10351	0	0	83	0	2.21382e-06	No	No	0	0	No	Yes	0
343	IR10350	0	0	94	0.0063402	0.00634064	No	No	0.0063402	0.0063402	No	No	0
344	IR10349	0	0	105	0	4.36055e-07	No	No	0	0	No	Yes	0
345	IR10347	0	0	43	0.0063402	0.00634399	No	No	0.0063402	0.0063402	No	No	0
346	IR10346	0	0	43	0.0063402	0.00634399	No	No	0.0063402	0.0063402	No	No	0
347	IR10345	0	0	43	0.0063402	0.00634399	No	No	0.0063402	0.0063402	No	No	0
348	IR10344	0	0	43	0.0063402	0.00634399	No	No	0.0063402	0.0063402	No	No	0
349	IR10343	0	0	43	0.0063402	0.00634399	No	No	0.0063402	0.0063402	No	No	0
350	IR10342	0	0	94	0.0063402	0.00634064	No	No	0.0063402	0.0063402	No	No	0
351	IR10341	0	0	105	0	4.36055e-07	No	No	0	0	No	Yes	0
352	IR10340	0	0	12	0.0063402	0.00634064	No	No	0.0063402	0.0063402	No	No	0
353	IR10339	0	0	12	0.0063402	0.00634064	No	No	0.0063402	0.0063402	No	No	0
354	IR10338	0	0	12	0.0063402	0.00634064	No	No	0.0063402	0.0063402	No	No	0
355	IR10337	0	0	12	0.0063402	0.00634064	No	No	0.0063402	0.0063402	No	No	0
356	IR10336	0	0	12	0.0063402	0.00634064	No	No	0.0063402	0.0063402	No	No	0
357	IR10335	0	0	12	0.0063402	0.00634064	No	No	0.0063402	0.0063402	No	No	0
358	IR10334	0	0	12	0.0063402	0.00634064	No	No	0.0063402	0.0063402	No	No	0
359	IR10333	0	0	0	0	0	No	Yes	0	0	No	Yes	0
360	IR10332	0	0	0	0	0	No	Yes	0	0	No	Yes	0
361	IR10331	0	0	0	0	0	No	Yes	0	0	No	Yes	0
362	IR10309	0	0	12	0.0063402	0.00634064	No	No	0.0063402	0.0063402	No	No	0
363	IR10204	0	0	0	0	7.31366e-07	No	No	0	7.2717e-07	No	No	0
364	IR10115	0	0	106	0	24.1953	Yes	No	0	24.195	Yes	No	1
365	IR10081	0	0	0	0	0.00025422	Yes	No	0	0	No	Yes	0
366	IR10078	0	0	0	0	0.00025422	Yes	No	0	0	No	Yes	0
367	IR10075	0	0	0	0	0	No	Yes	0	0	No	Yes	0
368	IR10074	0	0	0	0	0	No	Yes	0	0	No	Yes	0
369	IR10071	0	0	0	0	0	No	Yes	0	0	No	Yes	0
370	IR10069	0	0	0	28.7433	28.7439	Yes	No	28.744	28.744	No	No	0
371	IR10067	0	0	125	0	0.000158888	Yes	No	0	0	No	Yes	0
372	IR10065	0	0	0	0	0	No	Yes	0	0	No	Yes	0
373	IR10064	0	0	0	0	0	No	Yes	0	0	No	Yes	0
374	IR10062	0	0	7	0.00163314	0.00163314	No	No	0.0016331	0.0016331	No	No	0
375	IR10061	0	0	0	0	0	No	Yes	0	0	No	Yes	0
376	IR10060	0	0	0	0	0	No	Yes	0	0	No	Yes	0
377	IR10059	0	0	7	0.176259	0.176259	No	No	0.17626	0.17626	No	No	0
378	IR10058	0	0	96	0	0.106785	Yes	No	0	0.10678	Yes	No	0
379	IR10057	0	0	7	0.12872	0.12872	No	No	0.12872	0.12872	No	No	0
380	IR10055	0	0	0	0	0	No	Yes	0	0	No	Yes	0
381	IR10054	0	0	0	0	0	No	Yes	0	0	No	Yes	0
382	IR10053	0	0	28	0.025592	0.0256201	No	No	0.025598	0.025598	No	No	0
383	IR10049	0	0	7	0.294009	0.294009	No	No	0.29401	0.29401	No	No	0
384	IR10048	0	0	7	0.0958088	0.0958089	No	No	0.095809	0.095809	No	No	0
385	IR10045	0	0	0	0	0	No	Yes	0	0	No	Yes	0
386	IR10044	0	0	0	0	0	No	Yes	0	0	No	Yes	0
387	IR10043	0	0	2	0	3.6737e-06	No	No	0	0	No	Yes	0
388	IR10039	0	0	0	0	0.00489942	Yes	No	5.4287e-05	0.0048994	Yes	No	0
389	IR10038	0	0	0	0	0	No	Yes	0	0	No	Yes	0
390	IR10036	0	0	0	0	0	No	Yes	0	0	No	Yes	0
391	IR10034	0	0	0	0	0	No	Yes	0	0	No	Yes	0
392	IR10033	0	0	117	0	0	No	Yes	0	0	No	Yes	0
393	IR10032	0	0	0	0	0	No	Yes	0	0	No	Yes	0
394	IR10031	0	0	7	0.0658229	0.0658229	No	No	0.065823	0.065823	No	No	0
395	IR10025	0	0	0	0	0	No	Yes	0	0	No	Yes	0
396	IR10024	0	0	101	0	3.68435e-05	No	No	0	0	No	Yes	0
397	IR10023	0	0	7	0.0636288	0.0636288	No	No	0.063629	0.063629	No	No	0
398	IR10022	0	0	15	57.487	57.4879	Yes	No	57.488	57.488	No	No	0
399	IR10021	0	0	0	0	7.31366e-07	No	No	0	7.301e-07	No	No	0
400	IR10019	0	0	7	7.6062e-05	7.60621e-05	No	No	7.6062e-05	7.6062e-05	No	No	0
401	IR10017	0	0	7	0.00119871	0.00119871	No	No	0.0011987	0.0011987	No	No	0
402	IR10016	0	0	107	0	0	No	Yes	0	0	No	Yes	0
403	IR10015	0	0	0	0	0.000158888	Yes	No	0	0	No	Yes	0
404	IR10014	0	0	0	0	0	No	Yes	0	0	No	Yes	0
405	IR10013	0	0	0	1.83468e-29	3.71125e-05	No	Yes	0	0	No	Yes	0
406	IR10012	0	0	0	0	0	No	Yes	0	0	No	Yes	0
407	IR10011	0	0	0	0	0	No	Yes	0	0	No	Yes	0
408	IR10008	0	0	7	0.0394937	0.0394938	No	No	0.039494	0.039494	No	No	0
409	IR10007	0	0	81	0	2.23e-05	No	No	0	0	No	Yes	0
410	IR10006	0	0	7	0.14993	0.14993	No	No	0.14993	0.14993	No	No	0
411	IR10004	0	0	0	0	0	No	Yes	0	0	No	Yes	0
412	IR10002	0	0	0	0	0	No	Yes	0	0	No	Yes	0
413	IR10001	0	0	0	0	0.000363172	Yes	No	0	0	No	Yes	0
414	IR10000	0	0	7	0.00116726	0.00116726	No	No	0.0011673	0.0011673	No	No	0
415	IR09999	0	0	7	0.153587	0.153587	No	No	0.15359	0.15359	No	No	0
416	IR09998	0	0	0	0	0	No	Yes	0	0	No	Yes	0
417	IR09996	0	0	0	0	0	No	Yes	0	0	No	Yes	0
418	IR09994	0	0	0	0	0	No	Yes	0	0	No	Yes	0
419	IR09992	0	0	7	0.00163314	0.00163314	No	No	0.0016331	0.0016331	No	No	0
420	IR09991	0	0	7	0.000434431	0.000434431	No	No	0.00043443	0.00043443	No	No	0
421	IR09990	0	0	0	0	0	No	Yes	0	0	No	Yes	0
422	IR09984	0	0	79	0	0	No	Yes	0	0	No	Yes	0
423	IR09983	0	0	79	0	0	No	Yes	0	0	No	Yes	0
424	IR09982	0	0	3	0	0.000317775	Yes	No	0	0	No	Yes	0
425	IR09979	0	0	0	0	0	No	Yes	0	0	No	Yes	0
426	IR09978	0	0	0	0	0.000363172	Yes	No	0	0	No	Yes	0
427	IR09975	0	0	41	0	0	No	Yes	0	0	No	Yes	0
428	IR09974	0	0	0	0	0	No	Yes	0	0	No	Yes	0
429	IR09973	0	0	7	0.0965402	0.0965403	No	No	0.09654	0.09654	No	No	0
430	IR09971	0	0	117	0	0	No	Yes	0	0	No	Yes	0
431	IR09970	0	0	7	0.238425	0.238425	No	No	0.23843	0.23843	No	No	0
432	IR09969	0	0	7	0.313024	0.313025	No	No	0.31302	0.31302	No	No	0
433	IR09968	0	0	7	0.201857	0.201857	No	No	0.20186	0.20186	No	No	0
434	IR09967	0	0	0	0	0	No	Yes	0	0	No	Yes	0
435	IR09966	0	0	0	0	0	No	Yes	0	0	No	Yes	0
436	IR09965	0	0	0	0.08329	0.0881896	Yes	No	0.083344	0.08819	Yes	No	0
437	IR09964	0	0	2	0	3.6737e-06	No	No	0	0	No	Yes	0
438	IR09962	0	0	7	0.425654	0.425655	No	No	0.42565	0.42566	No	No	0
439	IR09961	0	0	93	0	0	No	Yes	0	0	No	Yes	0
440	IR09959	0	0	0	0	0	No	Yes	0	0	No	Yes	0
441	IR09955	0	0	0	0	0	No	Yes	0	0	No	Yes	0
442	IR09949	0	0	28	0.025592	0.0256201	No	No	0.025598	0.025598	No	No	0
443	IR09948	0	0	0	0	0	No	Yes	0	0	No	Yes	0
444	IR09947	0	0	101	0	3.68435e-05	No	No	0	0	No	Yes	0
445	IR09942	0	0	0	0	0	No	Yes	0	0	No	Yes	0
446	IR09941	0	0	0	0	0	No	Yes	0	0	No	Yes	0
447	IR09940	0	0	0	0	0	No	Yes	0	0	No	Yes	0
448	IR09939	0	0	34	0	0.0012711	Yes	No	0	0	No	Yes	0
449	IR09937	14	7	0	0	0	No	Yes	0	0	No	Yes	0
450	IR09936	0	0	0	0	0	No	Yes	0	0	No	Yes	0
451	IR09934	0	0	7	0.000434431	0.000434431	No	No	0.00043443	0.00043443	No	No	0
452	IR09927	0	0	119	0	6.15546e-06	No	No	0	0	No	Yes	0
453	IR09926	0	0	0	0	0	No	Yes	0	0	No	Yes	0
454	IR09925	0	0	97	0	6.35551e-05	No	No	0	0	No	Yes	0
455	IR09924	0	0	0	0	0	No	Yes	0	0	No	Yes	0
456	IR09920	0	0	7	0.167483	0.167483	No	No	0.16748	0.16748	No	No	0
457	IR09919	0	0	0	0.00167885	0.00199663	Yes	No	0.0018426	0.0019966	Yes	No	0
458	IR09917	0	0	7	0.205514	0.205514	No	No	0.20551	0.20551	No	No	0
459	IR09915	0	0	119	0	6.15546e-06	No	No	0	0	No	Yes	0
460	IR09914	0	0	119	0	6.15546e-06	No	No	0	0	No	Yes	0
461	IR09913	0	0	119	0	6.15546e-06	No	No	0	0	No	Yes	0
462	IR09905	0	0	110	0	5.8174e-06	No	No	0	0	No	Yes	0
463	IR09904	0	0	0	0	0	No	Yes	0	0	No	Yes	0
464	IR09895	0	0	0	0	0	No	Yes	0	0	No	Yes	0
465	IR09893	0	0	0	0	0.000423701	Yes	No	0	0	No	Yes	0
466	IR09892	0	0	0	0	0	No	Yes	0	0	No	Yes	0
467	IR09889	0	0	125	0	0.000158888	Yes	No	0	0	No	Yes	0
468	IR09888	0	0	0	0	0	No	Yes	0	0	No	Yes	0
469	IR09746	0	0	50	0	5.52653e-05	No	No	0	0	No	Yes	0
470	IR09745	0	0	0	0	0	No	Yes	0	0	No	Yes	0
471	IR09743	0	0	135	0	0	No	Yes	0	0	No	Yes	0
472	IR09733	0	0	0	0	0	No	Yes	0	0	No	Yes	0
473	IR09704	0	0	0	0	0	No	Yes	0	0	No	Yes	0
474	IR09703	0	0	0	0	0	No	Yes	0	0	No	Yes	0
475	IR09702	0	0	0	0	0	No	Yes	0	0	No	Yes	0
476	IR09701	0	0	0	0	0	No	Yes	0	0	No	Yes	0
477	IR09700	0	0	0	0	0	No	Yes	0	0	No	Yes	0
478	IR09699	0	0	0	0	0	No	Yes	0	0	No	Yes	0
479	IR09698	0	0	0	0	0	No	Yes	0	0	No	Yes	0
480	IR09697	0	0	113	0	0	No	Yes	0	0	No	Yes	0
481	IR09696	0	0	0	0	0	No	Yes	0	0	No	Yes	0
482	IR09695	0	0	0	0	0	No	Yes	0	0	No	Yes	0
483	IR09694	0	0	0	0	0	No	Yes	0	0	No	Yes	0
484	IR09693	0	0	0	0	0	No	Yes	0	0	No	Yes	0
485	IR09692	0	0	0	0	0	No	Yes	0	0	No	Yes	0
486	IR09691	0	0	0	0	0	No	Yes	0	0	No	Yes	0
487	IR09690	0	0	0	0	0	No	Yes	0	0	No	Yes	0
488	IR09689	0	0	0	0	0	No	Yes	0	0	No	Yes	0
489	IR09687	0	0	0	0	0.00489942	Yes	No	0	0.0048451	Yes	No	0
490	IR09686	0	0	113	0	0.00489942	Yes	No	0	0.0048451	Yes	No	0
491	IR09685	0	0	7	0.0881895	0.0881896	No	No	0.08819	0.08819	No	No	0
492	IR09684	0	0	7	0.0881895	0.0881896	No	No	0.08819	0.08819	No	No	0
493	IR09682	0	0	7	0.163314	0.163314	No	No	0.16331	0.16331	No	No	0
494	IR09681	0	0	7	0.163314	0.163314	No	No	0.16331	0.16331	No	No	0
495	IR09680	0	0	7	0.163314	0.163314	No	No	0.16331	0.16331	No	No	0
496	IR09668	0	0	0	0	0	No	Yes	0	0	No	Yes	0
497	IR09666	0	0	82	0.188675	0.188676	No	No	0.18867	0.18867	No	No	0
498	IR09664	0	0	12	0.0063402	0.00634064	No	No	0.0063402	0.0063402	No	No	0
499	IR09663	0	0	0	0	0	No	Yes	0	0	No	Yes	0
500	IR09662	0	0	90	0.201355	0.201359	No	No	0.20136	0.20136	No	No	0
501	IR09661	0	0	12	0.0063402	0.00634064	No	No	0.0063402	0.0063402	No	No	0
502	IR09659	0	0	90	0.201355	0.201359	No	No	0.20136	0.20136	No	No	0
503	IR09658	0	0	90	0.201355	0.201359	No	No	0.20136	0.20136	No	No	0
504	IR09656	0	0	12	0.0126804	0.0126813	No	No	0.01268	0.01268	No	No	0
505	IR09655	0	0	90	0.201355	0.201359	No	No	0.20136	0.20136	No	No	0
506	IR09654	0	0	12	0.0126804	0.0126813	No	No	0.01268	0.01268	No	No	0
507	IR09653	0	0	7	0.163314	0.163314	No	No	0.16331	0.16331	No	No	0
508	IR09652	0	0	90	0.201355	0.201359	No	No	0.20136	0.20136	No	No	0
509	IR09651	0	0	7	0.163314	0.163314	No	No	0.16331	0.16331	No	No	0
510	IR09650	0	0	90	0.201355	0.201359	No	No	0.20136	0.20136	No	No	0
511	IR09649	0	0	12	0.0063402	0.00634064	No	No	0.0063402	0.0063402	No	No	0
512	IR09648	0	0	121	0.175994	0.175995	No	No	0.17599	0.17599	No	No	0
513	IR09646	0	0	12	0.0063402	0.00634064	No	No	0.0063402	0.0063402	No	No	0
514	IR09645	0	0	0	0.201355	0.201358	No	No	0.20136	0.20136	No	No	0
515	IR09644	0	0	7	0.163314	0.163314	No	No	0.16331	0.16331	No	No	0
516	IR09643	0	0	83	0	2.21382e-06	No	No	0	0	No	Yes	0
517	IR09642	0	0	90	0.201355	0.201359	No	No	0.20136	0.20136	No	No	0
518	IR09641	0	0	134	0	0.000317775	Yes	No	0	0	No	Yes	0
519	IR09640	0	0	12	0.0063402	0.00634064	No	No	0.0063402	0.0063402	No	No	0
520	IR09638	0	0	82	0.188675	0.188676	No	No	0.18867	0.18867	No	No	0
521	IR09634	0	0	12	0.0063402	0.00634064	No	No	0.0063402	0.0063402	No	No	0
522	IR09633	0	0	90	0.201355	0.201359	No	No	0.20136	0.20136	No	No	0
523	IR09632	0	0	12	0.0063402	0.00634064	No	No	0.0063402	0.0063402	No	No	0
524	IR09631	0	0	90	0.201355	0.201359	No	No	0.20136	0.20136	No	No	0
525	IR09630	0	0	82	0.188675	0.188676	No	No	0.18867	0.18867	No	No	0
526	IR09629	0	0	82	0.188675	0.188676	No	No	0.18867	0.18867	No	No	0
527	IR09624	0	0	7	0.163314	0.163314	No	No	0.16331	0.16331	No	No	0
528	IR09622	0	0	121	0.175994	0.175995	No	No	0.17599	0.17599	No	No	0
529	IR09621	0	0	90	0.201355	0.201359	No	No	0.20136	0.20136	No	No	0
530	IR09620	0	0	90	0.201355	0.201359	No	No	0.20136	0.20136	No	No	0
531	IR09619	0	0	12	0.0126804	0.0126813	No	No	0.01268	0.01268	No	No	0
532	IR09593	0	0	0	0	9.18089	Yes	No	0	9.1806	Yes	No	3
533	IR09592	0	0	128	0.819107	0.819743	Yes	No	0.81943	0.81943	No	No	0
534	IR09380	0	0	0	0	0	No	Yes	0	0	No	Yes	0
535	IR09375	0	0	7	1.46273e-05	1.46273e-05	No	No	1.4627e-05	1.4627e-05	No	No	0
536	IR09363	0	0	0	0	0	No	Yes	0	0	No	Yes	0
537	IR09315	0	0	0	0	0.000317775	Yes	No	0	0	No	Yes	0
538	IR09309	0	0	114	0	9.18089	Yes	No	0	9.1806	Yes	No	3
539	IR09308	0	0	114	0	9.18089	Yes	No	0	9.1806	Yes	No	3
540	IR09306	0	0	0	0	9.18089	Yes	No	0	9.1806	Yes	No	3
541	IR09305	0	0	0	9.18026	9.18089	Yes	No	9.1806	9.1806	No	No	0
542	IR09304	0	0	0	9.18026	9.18089	Yes	No	9.1806	9.1806	No	No	0
543	IR08984	0	0	0	4.98	4.98032	Yes	No	4.98	4.98	No	No	0
544	IR08980	0	0	0	0	0	No	Yes	0	0	No	Yes	0
545	IR08963	0	0	0	0	9.09595	Yes	No	0	9.0956	Yes	No	2
546	IR08954	0	0	0	0	0.000105925	Yes	No	0	0	No	Yes	0
547	IR08946	0	0	7	4.31505e-05	4.31506e-05	No	No	4.3151e-05	4.3151e-05	No	No	0
548	IR08944	0	0	7	7.31365e-06	7.31366e-06	No	No	7.3137e-06	7.3137e-06	No	No	0
549	IR08934	0	0	0	0.051132	0.0513544	Yes	No	0.051196	0.051196	No	No	0
550	IR08933	0	0	0	-1.29158e-16	-1.29158e-16	No	Yes	0	0	No	Yes	0
551	IR08931	0	0	0	-2.58317e-16	-2.58317e-16	No	Yes	0	0	No	Yes	0
552	IR08920	0	0	92	0.201857	0.201924	No	No	0.20186	0.20186	No	No	0
553	IR08915	0	0	0	-2.58317e-16	-2.58317e-16	No	Yes	0	0	No	Yes	0
554	IR08913	0	0	7	0.0365682	0.0365683	No	No	0.036568	0.036568	No	No	0
555	IR08911	0	0	0	0	0.000726344	Yes	No	0	0	No	Yes	0
556	IR08910	0	0	0	0	0.0038031	Yes	No	0	0.0038031	Yes	No	0
557	IR08907	0	0	0	0	0	No	Yes	0	0	No	Yes	0
558	IR08894	0	0	92	0.201857	0.201924	No	No	0.20186	0.20186	No	No	0
559	IR08876	0	0	130	8.92567e-17	0.000317775	Yes	No	0	0	No	Yes	0
560	IR08875	0	0	92	0.201857	0.201924	No	No	0.20186	0.20186	No	No	0
561	IR08874	0	0	0	-1.38212e-32	-1.38212e-32	No	Yes	0	0	No	Yes	0
562	IR08872	0	0	123	0	0	No	Yes	0	0	No	Yes	0
563	IR08840	0	0	0	0	0	No	Yes	0	0	No	Yes	0
564	IR08833	0	0	0	0	0	No	Yes	0	0	No	Yes	0
565	IR08831	0	0	0	0	0	No	Yes	0	0	No	Yes	0
566	IR08829	0	0	118	0	0	No	Yes	0	0	No	Yes	0
567	IR08824	0	0	0	0	0.000423701	Yes	No	0	0	No	Yes	0
568	IR08823	0	0	0	0	0	No	Yes	0	0	No	Yes	0
569	IR08816	0	0	131	0	0	No	Yes	0	0	No	Yes	0
570	IR08815	0	0	0	0	0.000423701	Yes	No	0	0	No	Yes	0
571	IR08799	0	0	0	0	0	No	Yes	0	0	No	Yes	0
572	IR08796	0	0	98	0	0	No	Yes	0	0	No	Yes	0
573	IR08789	0	0	102	0	0	No	Yes	0	0	No	Yes	0
574	IR08776	0	0	104	0	0	No	Yes	0	0	No	Yes	0
575	IR08771	0	0	0	0	0	No	Yes	0	0	No	Yes	0
576	IR08770	0	0	0	0	0	No	Yes	0	0	No	Yes	0
577	IR08769	0	0	0	0	0	No	Yes	0	0	No	Yes	0
578	IR08768	0	0	89	0	0	No	Yes	0	0	No	Yes	0
579	IR08767	0	0	0	0	0	No	Yes	0	0	No	Yes	0
580	IR08762	0	0	0	0	0.00025422	Yes	No	0	0	No	Yes	0
581	IR08758	0	0	0	-1.02137e-24	9.18089	Yes	No	0	9.1806	Yes	No	3
582	IR08755	0	0	109	0	0	No	Yes	0	0	No	Yes	0
583	IR08754	0	0	111	0	0	No	Yes	0	0	No	Yes	0
584	IR08753	0	0	0	0	2.92927e-24	No	Yes	0	0	No	Yes	0
585	IR08752	0	0	0	0	6.38713e-25	No	Yes	0	0	No	Yes	0
586	IR08751	13	4	0	0	0	No	Yes	0	0	No	Yes	0
587	IR08747	0	0	0	0	0.000423701	Yes	No	0	0	No	Yes	0
588	IR08746	0	0	0	0	0.000423701	Yes	No	0	0	No	Yes	0
589	IR08745	0	0	124	0	0	No	Yes	0	0	No	Yes	0
590	IR08738	0	0	115	0	0	No	Yes	0	0	No	Yes	0
591	IR08729	0	0	87	7.31365e-07	7.31366e-07	No	No	7.3137e-07	7.3137e-07	No	No	0
592	IR08716	0	0	0	0	0.0012711	Yes	No	0	0	No	Yes	0
593	IR08712	0	0	0	0	0.0012711	Yes	No	0	0	No	Yes	0
594	IR08711	0	0	0	0	0	No	Yes	0	0	No	Yes	0
595	IR08708	0	0	31	0.170451	0.170457	No	No	0.17045	0.17045	No	No	0
596	IR08699	0	0	84	0	0	No	Yes	0	0	No	Yes	0
597	IR08691	0	0	0	0	0	No	Yes	0	0	No	Yes	0
598	IR08687	0	0	0	0	0	No	Yes	0	0	No	Yes	0
599	IR08663	0	0	129	0	0	No	Yes	0	0	No	Yes	0
600	IR08659	0	0	112	0	0	No	Yes	0	0	No	Yes	0
601	IR08641	0	0	0	0	0	No	Yes	0	0	No	Yes	0
602	IR08640	0	0	71	0	0.000423701	Yes	No	0	0	No	Yes	0
603	IR08608	0	0	0	0	0.000635551	Yes	No	0	0	No	Yes	0
604	IR08605	0	0	0	0	24.1953	Yes	No	0	24.195	Yes	No	1
605	IR08603	0	0	0	0	0	No	Yes	0	0	No	Yes	0
606	IR08597	0	0	0	0	0.000847401	Yes	No	0	0	No	Yes	0
607	IR08596	0	0	0	0	0.000423701	Yes	No	0	0	No	Yes	0
608	IR08557	0	0	0	0	0	No	Yes	0	0	No	Yes	0
609	IR08488	0	0	0	0	0	No	Yes	0	0	No	Yes	0
610	IR08425	0	0	7	0.0365682	0.0365683	No	No	0.036568	0.036568	No	No	0
611	IR08155	0	0	25	0.313024	0.313135	Yes	No	0.31302	0.31302	No	No	0
612	IR07969	0	0	0	0	6.94155	Yes	No	0	6.9412	Yes	No	4, 5, 7
613	IR07961	0	0	37	0.415349	0.415388	No	No	0.41535	0.41535	No	No	0
614	IR07938	0	0	0	0	6.94155	Yes	No	0	6.9412	Yes	No	5, 6, 7
615	IR07919	0	0	27	0.607076	0.607246	Yes	No	0.60708	0.60708	No	No	0
616	IR07898	0	0	0	0	6.94155	Yes	No	0	6.9412	Yes	No	7
617	IR07876	0	0	0	0.0255978	0.0256201	No	No	0.025598	0.025599	No	No	0
618	IR07449	0	0	0	-2.06653e-15	-2.06653e-15	No	Yes	0	0	No	Yes	0
619	IR07064	0	0	0	0	0	No	Yes	0	0	No	Yes	0
620	IR07023	0	0	0	0	0	No	Yes	0	0	No	Yes	0
621	IR07019	0	0	0	0	0	No	Yes	0	0	No	Yes	0
622	IR06875	0	0	8	0.0658229	0.0658617	No	No	0.065823	0.065823	No	No	0
623	IR06768	0	0	99	0	0.000317775	Yes	No	0	0.00015406	Yes	No	0
624	IR06714	0	0	16	0.258611	0.258666	No	No	0.25861	0.25861	No	No	0
625	IR06374	0	0	7	7.31365e-06	7.31366e-06	No	No	7.3137e-06	7.3137e-06	No	No	0
626	IR06307	0	0	7	0.00199663	0.00199663	No	No	0.0019966	0.0019966	No	No	0
627	IR06237	0	0	12	0.0126804	0.0126813	No	No	0.01268	0.01268	No	No	0
628	IR06190	0	0	7	0.0201857	0.0201857	No	No	0.020186	0.020186	No	No	0
629	IR06045	0	0	78	-3.75599e-29	3.88123e-05	No	Yes	0	0	No	Yes	0
630	IR06019	0	0	0	0	0	No	Yes	0	0	No	Yes	0
631	IR05641	0	0	87	5.85092e-06	5.85093e-06	No	No	5.8509e-06	5.8509e-06	No	No	0
632	IR05590	0	0	50	0	5.52653e-05	No	No	0	0	No	Yes	0
633	IR05416	0	0	103	0	6.94155	Yes	No	0	6.9412	Yes	No	4, 5, 7
634	IR05396	0	0	95	0	0	No	Yes	0	0	No	Yes	0
635	IR05334	0	0	0	0	0.128805	Yes	No	0	0.12872	Yes	No	0
636	IR05211	0	0	0	0	2.46816e-05	No	No	0	0	No	Yes	0
637	IR05172	0	0	30	0.153587	0.15395	Yes	No	0.15359	0.15359	No	No	0
638	IR05151	0	0	0	0.143348	0.143353	No	No	0.14335	0.14335	No	No	0
639	IR05143	0	0	25	0.313024	0.313135	Yes	No	0.31302	0.31302	No	No	0
640	IR05071	0	0	26	0.349526	0.349563	No	No	0.34953	0.34953	No	No	0
641	IR05024	0	0	0	0	0	No	Yes	0	0	No	Yes	0
642	IR04962	0	0	6	0	0.00016948	Yes	No	0	0	No	Yes	0
643	IR04953	0	0	0	0	0	No	Yes	0	0	No	Yes	0
644	IR04882	0	0	14	0	4.53965e-05	No	No	0	0	No	Yes	0
645	IR04855	0	0	0	0	0	No	Yes	0	0	No	Yes	0
646	IR04851	0	0	79	0	0	No	Yes	0	0	No	Yes	0
647	IR04850	0	0	0	0.063513	0.063672	Yes	No	0.063672	0.063672	No	No	0
648	IR04615	0	0	0	0	9.09595	Yes	No	0	9.0956	Yes	No	2
649	IR04564	0	0	0	9.92804	9.92869	Yes	No	9.9283	9.9283	No	No	0
650	IR04559	0	0	0	0	6.94155	Yes	No	0	6.9412	Yes	No	5, 6, 7
651	IR04473	0	0	0	0	0	No	Yes	0	0	No	Yes	0
652	IR04458	0	0	0	0	0.000317775	Yes	No	0	0	No	Yes	0
653	IR04369	0	0	0	0.243734	0.24374	No	No	0.24373	0.24373	No	No	0
654	IR04367	0	0	0	0	0.00016948	Yes	No	7.1935e-05	0.018065	Yes	No	0
655	IR04366	0	0	0	0	0	No	Yes	0	0	No	Yes	0
656	IR04347	0	0	0	0	0.0180647	Yes	No	0	0	No	Yes	0
657	IR04346	0	0	0	0	0.0187356	Yes	No	6.6184e-05	0.018608	Yes	No	0
658	IR04345	0	0	0	0	0.0185767	Yes	No	0	0.018577	Yes	No	0
659	IR04344	0	0	0	0	0.0180647	Yes	No	0	0.018065	Yes	No	0
660	IR04343	0	0	72	0	0.0187356	Yes	No	0	0.01851	Yes	No	0
661	IR04342	0	0	0	0	0.0180647	Yes	No	0	0.017993	Yes	No	0
662	IR04341	0	0	0	0	0.0185767	Yes	No	0	0.018577	Yes	No	0
663	IR04340	0	0	0	0	0.0180647	Yes	No	0	0.018065	Yes	No	0
664	IR04336	0	0	84	0	0	No	Yes	0	0	No	Yes	0
665	IR04330	0	0	0	0	0	No	Yes	0	0	No	Yes	0
666	IR04322	0	0	0	0	0.000317775	Yes	No	0	0	No	Yes	0
667	IR04315	0	0	134	2.28662e-23	0.000317775	Yes	No	0	0	No	Yes	0
668	IR04311	0	0	0	0	0.000317775	Yes	No	0	0	No	Yes	0
669	IR04310	0	0	127	0.11263	0.112948	Yes	No	0.11263	0.11263	No	No	0
670	IR04308	0	0	0	0	0	No	Yes	0	0	No	Yes	0
671	IR04307	0	0	0	0	0.000317775	Yes	No	0	0	No	Yes	0
672	IR04300	0	0	0	-2.58317e-16	-2.58317e-16	No	Yes	0	0	No	Yes	0
673	IR04298	0	0	7	1.46273e-05	1.46273e-05	No	No	1.4627e-05	1.4627e-05	No	No	0
674	IR04297	0	0	7	7.31365e-06	7.31366e-06	No	No	7.3137e-06	7.3137e-06	No	No	0
675	IR04295	0	0	7	7.31365e-06	7.31366e-06	No	No	7.3137e-06	7.3137e-06	No	No	0
676	IR04293	0	0	0	0	0	No	Yes	0	0	No	Yes	0
677	IR04292	0	0	7	0.00199663	0.00199663	No	No	0.0019966	0.0019966	No	No	0
678	IR04289	0	0	0	0	0	No	Yes	0	0	No	Yes	0
679	IR04287	0	0	0	0	0	No	Yes	0	0	No	Yes	0
680	IR04285	0	0	87	5.85092e-06	5.85093e-06	No	No	5.8509e-06	5.8509e-06	No	No	0
681	IR04284	0	0	7	0.182847	0.182847	No	No	0.18285	0.18285	No	No	0
682	IR04283	0	0	0	0	0	No	Yes	0	0	No	Yes	0
683	IR04282	0	0	0	0	0	No	Yes	0	0	No	Yes	0
684	IR04278	0	0	0	0	0	No	Yes	0	0	No	Yes	0
685	IR04244	0	0	7	0.0201857	0.0201857	No	No	0.020186	0.020186	No	No	0
686	IR04238	0	0	28	0.025592	0.0256201	No	No	0.025598	0.025598	No	No	0
687	IR04206	0	0	0	0	0.000363172	Yes	No	0	0	No	Yes	0
688	IR04182	0	0	74	0	0.00016948	Yes	No	0	0	No	Yes	0
689	IR04173	0	0	0	0	0	No	Yes	0	0	No	Yes	0
690	IR04172	0	0	0	0	0	No	Yes	0	0	No	Yes	0
691	IR04171	0	0	0	0	0	No	Yes	0	0	No	Yes	0
692	IR04165	0	0	0	0	0	No	Yes	0	0	No	Yes	0
693	IR04164	0	0	0	-2.58317e-16	-2.58317e-16	No	Yes	0	0	No	Yes	0
694	IR04162	0	0	0	0	0	No	Yes	0	0	No	Yes	0
695	IR04157	0	0	0	0	0	No	Yes	0	0	No	Yes	0
696	IR04107	0	0	0	0	0	No	Yes	0	0	No	Yes	0
697	IR04100	0	0	1	0	0	No	Yes	0	0	No	Yes	0
698	IR04052	0	0	8	0.0658229	0.0658617	No	No	0.065823	0.065823	No	No	0
699	IR04050	0	0	7	0.0365682	0.0365683	No	No	0.036568	0.036568	No	No	0
700	IR04044	0	0	7	0.0201857	0.0201857	No	No	0.020186	0.020186	No	No	0
701	IR04030	0	0	0	0	0	No	Yes	0	0	No	Yes	0
702	IR04028	0	0	0	0	0	No	Yes	0	0	No	Yes	0
703	IR04010	0	0	26	0.349526	0.349563	No	No	0.34953	0.34953	No	No	0
704	IR03994	0	0	0	0	0	No	Yes	0	0	No	Yes	0
705	IR03964	0	0	0	0	0	No	Yes	0	0	No	Yes	0
706	IR03961	0	0	0	0	0	No	Yes	0	0	No	Yes	0
707	IR03952	0	0	1	0	0	No	Yes	0	0	No	Yes	0
708	IR03896	0	0	0	0	0	No	Yes	0	0	No	Yes	0
709	IR03881	0	0	7	4.31505e-05	4.31506e-05	No	No	4.3151e-05	4.3151e-05	No	No	0
710	IR03879	0	0	8	0.0658229	0.0658617	No	No	0.065823	0.065823	No	No	0
711	IR03823	0	0	16	0.258611	0.258666	No	No	0.25861	0.25861	No	No	0
712	IR03809	0	0	0	0	0	No	Yes	0	0	No	Yes	0
713	IR03801	0	0	86	0	4.23701e-05	No	No	0	0	No	Yes	0
714	IR03797	0	0	24	0.205514	0.205672	Yes	No	0.20551	0.20551	No	No	0
715	IR03796	0	0	50	0	5.52653e-05	No	No	0	0	No	Yes	0
716	IR03784	0	0	68	0.0255978	0.0256201	No	No	0.025598	0.025598	No	No	0
717	IR03777	0	0	63	0	0.000110531	Yes	No	0	0.00015114	Yes	No	0
718	IR03767	0	0	0	0	0	No	Yes	0	0	No	Yes	0
719	IR03761	0	0	13	-4.49572e-17	4.53965e-05	No	Yes	0	0	No	Yes	0
720	IR03724	0	0	0	0	0	No	Yes	0	0	No	Yes	0
721	IR03716	0	0	0	0	0	No	Yes	0	0	No	Yes	0
722	IR03708	0	0	0	0	7.94438e-05	No	No	0	0	No	Yes	0
723	IR03705	0	0	0	0	0	No	Yes	0	0	No	Yes	0
724	IR03695	0	0	0	0	0	No	Yes	0	0	No	Yes	0
725	IR03677	0	0	132	0	0.000317775	Yes	No	0	0	No	Yes	0
726	IR03667	0	0	0	0	0	No	Yes	0	0	No	Yes	0
727	IR03652	0	0	28	0.025592	0.0256201	No	No	0.025598	0.025598	No	No	0
728	IR03648	0	0	35	0.230453	0.230473	No	No	0.23045	0.23045	No	No	0
729	IR03646	0	0	0	0	0	No	Yes	0	0	No	Yes	0
730	IR03645	0	0	0	0	0	No	Yes	0	0	No	Yes	0
731	IR03632	0	0	0	0	5.52653e-05	No	No	0	0	No	Yes	0
732	IR03624	0	0	0	0	0	No	Yes	0	0	No	Yes	0
733	IR03622	0	0	65	0	0.106785	Yes	No	0	0.10678	Yes	No	0
734	IR03610	0	0	8	0.0658229	0.0658617	No	No	0.065823	0.065823	No	No	0
735	IR03609	0	0	0	0	6.35551e-05	No	No	0	0	No	Yes	0
736	IR03607	0	0	0	0	0.000158888	Yes	No	0	0	No	Yes	0
737	IR03599	0	0	0	0	0	No	Yes	0	0	No	Yes	0
738	IR03590	0	0	33	0.211729	0.211809	No	No	0.21173	0.21173	No	No	0
739	IR03586	0	0	0	0	0.203656	Yes	No	0	0.20362	Yes	No	0
740	IR03583	0	0	0	0	0.000105925	Yes	No	0	0	No	Yes	0
741	IR03577	0	0	116	0	0.000158888	Yes	No	0	0	No	Yes	0
742	IR03576	0	0	116	0	0.000158888	Yes	No	0	0	No	Yes	0
743	IR03570	0	0	0	0.238425	0.23848	No	No	0.23843	0.23843	No	No	0
744	IR03564	0	0	0	0	0	No	Yes	0	0	No	Yes	0
745	IR03560	0	0	29	0	0.000105925	Yes	No	0	0	No	Yes	0
746	IR03556	0	0	83	0	4.42764e-06	No	No	0	0	No	Yes	0
747	IR03552	0	0	54	0.153587	0.153904	Yes	No	0.15359	0.15359	No	No	0
748	IR03548	0	0	0	0	0.000317775	Yes	No	0	0	No	Yes	0
749	IR03538	0	0	0	0	0.000317775	Yes	No	0	0	No	Yes	0
750	IR03535	0	0	0	0	0.000317775	Yes	No	0	0	No	Yes	0
751	IR03532	0	0	0	0	0.000317775	Yes	No	0	0	No	Yes	0
752	IR03527	0	0	0	11.8917	20.9883	Yes	No	11.892	20.988	Yes	No	2
753	IR03520	0	0	0	0	0.000317775	Yes	No	0	0	No	Yes	0
754	IR03518	0	0	104	0	0	No	Yes	0	0	No	Yes	0
755	IR03510	0	0	31	0.170451	0.170457	No	No	0.17045	0.17045	No	No	0
756	IR03505	0	0	0	7.7495e-16	0.000105925	Yes	No	0	0	No	Yes	0
757	IR03504	0	0	0	0	0.000158888	Yes	No	0	0	No	Yes	0
758	IR03497	0	0	0	0	0	No	Yes	0	0	No	Yes	0
759	IR03493	0	0	0	0	0	No	Yes	0	0	No	Yes	0
760	IR03486	0	0	12	0.0063402	0.00634064	No	No	0.0063402	0.0063402	No	No	0
761	IR03420	0	0	0	0	0	No	Yes	0	0	No	Yes	0
762	IR03345	0	0	0	0	0	No	Yes	0	0	No	Yes	0
763	IR03226	0	0	0	-2.06653e-15	-2.06653e-15	No	Yes	0	0	No	Yes	0
764	IR03182	0	0	0	0	0	No	Yes	0	0	No	Yes	0
765	IR03033	0	0	12	0.0126804	0.0126813	No	No	0.01268	0.01268	No	No	0
766	IR03032	0	0	12	0.0126804	0.0126813	No	No	0.01268	0.01268	No	No	0
767	IR03030	0	0	12	0.0126804	0.0126813	No	No	0.01268	0.01268	No	No	0
768	IR03024	0	0	0	-2.06653e-15	-2.06653e-15	No	Yes	0	0	No	Yes	0
769	IR03023	0	0	0	-2.06653e-15	-2.06653e-15	No	Yes	0	0	No	Yes	0
770	IR03022	0	0	0	-2.06653e-15	-2.06653e-15	No	Yes	0	0	No	Yes	0
771	IR03021	0	0	0	-2.06653e-15	-2.06653e-15	No	Yes	0	0	No	Yes	0
772	IR03012	0	0	64	0	0	No	Yes	0	0	No	Yes	0
773	IR02961	0	0	7	0.0365682	0.0365683	No	No	0.036568	0.036568	No	No	0
774	IR02782	0	0	20	0.0530518	0.0530585	No	No	0.053052	0.053052	No	No	0
775	IR02774	0	0	0	0	0	No	Yes	0	0	No	Yes	0
776	IR02745	0	0	0	0	0	No	Yes	0	0	No	Yes	0
777	IR02744	0	0	0	0	0	No	Yes	0	0	No	Yes	0
778	IR02733	0	0	0	0	0	No	Yes	0	0	No	Yes	0
779	IR02695	0	0	0	0	0	No	Yes	0	0	No	Yes	0
780	IR02691	0	0	0	0	0	No	Yes	0	0	No	Yes	0
781	IR02688	0	0	0	0	0	No	Yes	0	0	No	Yes	0
782	IR02684	0	0	0	0	0	No	Yes	0	0	No	Yes	0
783	IR02681	0	0	0	0	0	No	Yes	0	0	No	Yes	0
784	IR02668	0	0	106	0	48.3906	Yes	No	0	48.39	Yes	No	1
785	IR02667	0	0	0	0	0	No	Yes	0	0	No	Yes	0
786	IR02666	0	0	0	0	0	No	Yes	0	0	No	Yes	0
787	IR02665	0	0	0	0	0	No	Yes	0	0	No	Yes	0
788	IR02664	0	0	12	0.0126804	0.0126813	No	No	0.01268	0.01268	No	No	0
789	IR02645	0	0	0	0	0	No	Yes	0	0	No	Yes	0
790	IR02640	0	0	0	0	0	No	Yes	0	0	No	Yes	0
791	IR02630	0	0	0	0	0	No	Yes	0	0	No	Yes	0
792	IR02616	0	0	7	0.0201857	0.0201857	No	No	0.020186	0.020186	No	No	0
793	IR02613	0	0	0	0	0	No	Yes	0	0	No	Yes	0
794	IR02607	0	0	0	-2.58317e-16	-2.58317e-16	No	Yes	0	0	No	Yes	0
795	IR02606	0	0	0	-2.58317e-16	-2.58317e-16	No	Yes	0	0	No	Yes	0
796	IR02605	0	0	0	-2.58317e-16	-2.58317e-16	No	Yes	0	0	No	Yes	0
797	IR02604	0	0	0	-1.29158e-16	-1.29158e-16	No	Yes	0	0	No	Yes	0
798	IR02603	0	0	0	0	0	No	Yes	0	0	No	Yes	0
799	IR02596	0	0	0	0	0	No	Yes	0	0	No	Yes	0
800	IR02552	0	0	0	0	0	No	Yes	0	0	No	Yes	0
801	IR02504	0	0	0	0	0	No	Yes	0	0	No	Yes	0
802	IR02503	0	0	0	0	0	No	Yes	0	0	No	Yes	0
803	IR02477	0	0	0	0	0	No	Yes	0	0	No	Yes	0
804	IR02475	0	0	27	0.607076	0.607246	Yes	No	0.60708	0.60708	No	No	0
805	IR02466	0	0	6	0	0.00016948	Yes	No	0	0	No	Yes	0
806	IR02457	0	0	0	0	0	No	Yes	0	0	No	Yes	0
807	IR02434	0	0	16	0.258611	0.258666	No	No	0.25861	0.25861	No	No	0
808	IR02407	12	2	0	0	0	No	Yes	0	0	No	Yes	0
809	IR02389	0	0	0	0	0	No	Yes	0	0	No	Yes	0
810	IR02357	0	0	74	0	0.00016948	Yes	No	0	0	No	Yes	0
811	IR02345	0	0	26	0.349526	0.349563	No	No	0.34953	0.34953	No	No	0
812	IR02335	0	0	0	0	0	No	Yes	0	0	No	Yes	0
813	IR02308	0	0	0	0	0	No	Yes	0	0	No	Yes	0
814	IR02300	0	0	63	2.41416e-17	0.000110531	Yes	No	0	0	No	Yes	0
815	IR02286	0	0	0	0	0	No	Yes	0	0	No	Yes	0
816	IR02277	0	0	63	2.41416e-17	0.000110531	Yes	No	0	0	No	Yes	0
817	IR02265	0	0	8	0.0658229	0.0658617	No	No	0.065823	0.065823	No	No	0
818	IR02264	0	0	8	0.0658229	0.0658617	No	No	0.065823	0.065823	No	No	0
819	IR02236	0	0	1	0	0	No	Yes	0	0	No	Yes	0
820	IR02232	0	0	0	0	0	No	Yes	0	0	No	Yes	0
821	IR02216	0	0	0	0	0	No	Yes	0	0	No	Yes	0
822	IR02208	0	0	0	0	0	No	Yes	0	0	No	Yes	0
823	IR02156	0	0	1	0	0	No	Yes	0	0	No	Yes	0
824	IR02024	0	0	10	0.0394937	0.0395361	No	No	0.039494	0.039494	No	No	0
825	IR02023	0	0	10	0.0394937	0.0395361	No	No	0.039494	0.039494	No	No	0
826	IR02020	0	0	7	0.0365682	0.0365683	No	No	0.036568	0.036568	No	No	0
827	IR02019	0	0	120	0	0.000158888	Yes	No	0	7.8374e-05	No	No	0
828	IR02007	0	0	0	0	0	No	Yes	0	0	No	Yes	0
829	IR01996	0	0	8	0.0658229	0.0658617	No	No	0.065823	0.065823	No	No	0
830	IR01933	0	0	12	0.0126804	0.0126813	No	No	0.01268	0.01268	No	No	0
831	IR01932	0	0	12	0.0126804	0.0126813	No	No	0.01268	0.01268	No	No	0
832	IR01889	0	0	0	0	0	No	Yes	0	0	No	Yes	0
833	IR01879	0	0	0	0	0	No	Yes	0	0	No	Yes	0
834	IR01869	0	0	7	4.31505e-05	4.31506e-05	No	No	4.3151e-05	4.3151e-05	No	No	0
835	IR01843	0	0	0	0	0	No	Yes	0	0	No	Yes	0
836	IR01834	0	0	0	0	0	No	Yes	0	0	No	Yes	0
837	IR01833	0	0	0	0	3.65683e-07	No	No	2.0997e-09	3.6568e-07	No	No	0
838	IR01832	0	0	0	0	7.31366e-07	No	No	1.2687e-09	7.3137e-07	No	No	0
839	IR01826	0	0	0	0	0	No	Yes	0	0	No	Yes	0
840	IR01816	0	0	87	7.31365e-07	7.31366e-07	No	No	7.3137e-07	7.3137e-07	No	No	0
841	IR01814	0	0	7	0.0201857	0.0201857	No	No	0.020186	0.020186	No	No	0
842	IR01804	0	0	95	0	2.46816e-05	No	No	0	0	No	Yes	0
843	IR01797	0	0	52	0	6.69001e-05	No	No	0	0	No	Yes	0
844	IR01792	0	0	87	7.31365e-07	7.31366e-07	No	No	7.3137e-07	7.3137e-07	No	No	0
845	IR01778	0	0	81	6.39986e-25	2.23e-05	No	Yes	0	0	No	Yes	0
846	IR01775	0	0	0	0	0	No	Yes	0	0	No	Yes	0
847	IR01758	0	0	50	0	5.52653e-05	No	No	0	0	No	Yes	0
848	IR01746	0	0	40	0.300591	0.300636	No	No	0.30059	0.30059	No	No	0
849	IR01735	0	0	120	0	0.000158888	Yes	No	0	7.8374e-05	No	No	0
850	IR01734	0	0	0	0.0364094	0.0365683	Yes	No	0.03649	0.036568	No	No	0
851	IR01705	0	0	0	0	0	No	Yes	0	0	No	Yes	0
852	IR01689	0	0	0	0	0	No	Yes	0	0	No	Yes	0
853	IR01614	0	0	7	0.0201857	0.0201857	No	No	0.020186	0.020186	No	No	0
854	IR01611	0	0	7	0.0201857	0.0201857	No	No	0.020186	0.020186	No	No	0
855	IR01582	0	0	16	0.258611	0.258666	No	No	0.25861	0.25861	No	No	0
856	IR01573	0	0	10	0.0394937	0.0395361	No	No	0.039494	0.039494	No	No	0
857	IR01570	0	0	108	0	0.000105925	Yes	No	0	0	No	Yes	0
858	IR01547	0	0	0	0	0	No	Yes	0	0	No	Yes	0
859	IR01534	0	0	74	0	0.00016948	Yes	No	0	0	No	Yes	0
860	IR01527	0	0	73	0.256709	0.256868	Yes	No	0.25671	0.25671	No	No	0
861	IR01483	0	0	0	0	0	No	Yes	0	0	No	Yes	0
862	IR01474	0	0	0	0	0	No	Yes	0	0	No	Yes	0
863	IR01467	0	0	0	0	0.000158888	Yes	No	0	0	No	Yes	0
864	IR01445	0	0	95	0	2.46816e-05	No	No	0	0	No	Yes	0
865	IR01443	0	0	95	0	2.46816e-05	No	No	0	0	No	Yes	0
866	IR01425	0	0	0	0	0	No	Yes	0	0	No	Yes	0
867	IR01420	0	0	0	0	5.52653e-05	No	No	0	0	No	Yes	0
868	IR01409	0	0	7	4.31505e-05	4.31506e-05	No	No	4.3151e-05	4.3151e-05	No	No	0
869	IR01366	0	0	85	-7.06946e-30	3.71125e-05	No	Yes	0	0	No	Yes	0
870	IR01364	0	0	85	-7.07085e-30	3.71125e-05	No	Yes	0	0	No	Yes	0
871	IR01357	0	0	19	0.300591	0.300646	No	No	0.30059	0.30059	No	No	0
872	IR01353	0	0	0	0	0	No	Yes	0	0	No	Yes	0
873	IR01348	0	0	0	0	3.68435e-05	No	No	0	0	No	Yes	0
874	IR01347	0	0	101	0	3.68435e-05	No	No	0	0	No	Yes	0
875	IR01289	0	0	0	0	0.000158888	Yes	No	0	6.9403e-05	No	No	0
876	IR01287	0	0	0	0	0	No	Yes	0	0	No	Yes	0
877	IR01277	0	0	77	-3.7569e-29	3.88123e-05	No	Yes	0	0	No	Yes	0
878	IR01274	0	0	77	-3.7569e-29	3.88123e-05	No	Yes	0	0	No	Yes	0
879	IR01266	0	0	101	0	3.68435e-05	No	No	0	0	No	Yes	0
880	IR01238	0	0	7	0.0365682	0.0365683	No	No	0.036568	0.036568	No	No	0
881	IR01215	0	0	50	0	5.52653e-05	No	No	0	0	No	Yes	0
882	IR01181	0	0	108	0	0.000105925	Yes	No	0	0	No	Yes	0
883	IR01160	0	0	107	0	3.71125e-05	No	No	0	0	No	Yes	0
884	IR01159	0	0	0	0	0	No	Yes	0	0	No	Yes	0
885	IR01158	0	0	7	0.0180647	0.0180647	No	No	0.018065	0.018065	No	No	0
886	IR01157	0	0	0	0	0.000158888	Yes	No	0	0	No	Yes	0
887	IR01145	0	0	0	0	0	No	Yes	0	0	No	Yes	0
888	IR01122	0	0	0	0	0	No	Yes	0	0	No	Yes	0
889	IR01115	0	0	59	9.18055	9.18089	Yes	No	9.1806	9.1806	No	No	0
890	IR01114	0	0	9	0	0.000317775	Yes	No	0	0	No	Yes	0
891	IR01104	0	0	0	-2.58317e-16	-2.58317e-16	No	Yes	0	0	No	Yes	0
892	IR01097	0	0	0	0	0.000158888	Yes	No	0	0	No	Yes	0
893	IR01087	0	0	50	0	5.52653e-05	No	No	0	0	No	Yes	0
894	IR01079	0	0	0	0	0	No	Yes	0	0	No	Yes	0
895	IR01049	0	0	0	0	0	No	Yes	0	0	No	Yes	0
896	IR01046	0	0	0	0.230453	0.230473	No	No	0.23045	0.23045	No	No	0
897	IR01040	0	0	0	0	0	No	Yes	0	0	No	Yes	0
898	IR01037	0	0	0	0	0	No	Yes	0	0	No	Yes	0
899	IR01017	0	0	40	0.300591	0.300636	No	No	0.30059	0.30059	No	No	0
900	IR01001	0	0	100	0	8.47401e-05	No	No	0	0	No	Yes	0
901	IR00999	0	0	100	0	8.47401e-05	No	No	0	0	No	Yes	0
902	IR00990	0	0	96	0	0.106785	Yes	No	0	0.10678	Yes	No	0
903	IR00986	0	0	122	0.378116	0.378208	No	No	0.37812	0.37812	No	No	0
904	IR00985	0	0	0	0	0.000105925	Yes	No	0	0	No	Yes	0
905	IR00984	0	0	0	0	0.203656	Yes	No	0	0.20362	Yes	No	0
906	IR00981	0	0	0	0	0	No	Yes	0	0	No	Yes	0
907	IR00973	0	0	132	0	0.000317775	Yes	No	0	0.00015114	Yes	No	0
908	IR00966	0	0	0	0	0.000363172	Yes	No	0	0	No	Yes	0
909	IR00962	0	0	0	0	9.18089	Yes	No	0	9.1806	Yes	No	3
910	IR00961	0	0	0	0	0	No	Yes	0	0	No	Yes	0
911	IR00955	0	0	0	0.0957241	0.0958335	Yes	No	0.095809	0.095809	No	No	0
912	IR00948	0	0	0	0	0	No	Yes	0	0	No	Yes	0
913	IR00947	0	0	7	0.0365682	0.0365683	No	No	0.036568	0.036568	No	No	0
914	IR00946	0	0	0	0.224529	0.224554	No	No	0.22453	0.22453	No	No	0
915	IR00945	0	0	19	0.300591	0.300646	No	No	0.30059	0.30059	No	No	0
916	IR00917	0	0	91	0	0.000105925	Yes	No	0	0	No	Yes	0
917	IR00916	0	0	0	0	0.000105925	Yes	No	0	0	No	Yes	0
918	IR00909	0	0	0	0	0	No	Yes	0	0	No	Yes	0
919	IR00904	0	0	0	-2.58317e-16	-2.58317e-16	No	Yes	0	0	No	Yes	0
920	IR00894	0	0	0	0	0	No	Yes	0	0	No	Yes	0
921	IR00890	0	0	122	0.378116	0.378208	No	No	0.37812	0.37812	No	No	0
922	IR00857	0	0	97	0	6.35551e-05	No	No	0	0	No	Yes	0
923	IR00853	0	0	0	0	0	No	Yes	0	0	No	Yes	0
924	IR00841	0	0	60	0	0.128805	Yes	No	0	0.12872	Yes	No	0
925	IR00840	0	0	0	0	0	No	Yes	0	0	No	Yes	0
926	IR00832	0	0	63	2.41416e-17	0.000110531	Yes	No	0	0	No	Yes	0
927	IR00829	0	0	0	0	0.000317775	Yes	No	0	0	No	Yes	0
928	IR00824	0	0	0	0	0	No	Yes	0	0	No	Yes	0
929	IR00811	0	0	0	0	0	No	Yes	0	0	No	Yes	0
930	IR00806	0	0	0	0	0	No	Yes	0	0	No	Yes	0
931	IR00799	0	0	0	0	0.000363172	Yes	No	0	0	No	Yes	0
932	IR00791	0	0	0	0	0.000105925	Yes	No	0	0	No	Yes	0
933	IR00781	0	0	0	0.203619	0.203725	Yes	No	0.20362	0.20362	No	No	0
934	IR00777	0	0	91	0	0.000105925	Yes	No	0	0	No	Yes	0
935	IR00776	0	0	7	4.31505e-05	4.31506e-05	No	No	4.3151e-05	4.3151e-05	No	No	0
936	IR00764	0	0	74	0	0.00016948	Yes	No	0	0	No	Yes	0
937	IR00748	0	0	0	0	0	No	Yes	0	0	No	Yes	0
938	IR00747	0	0	0	0	0	No	Yes	0	0	No	Yes	0
939	IR00746	0	0	0	0	0	No	Yes	0	0	No	Yes	0
940	IR00737	0	0	0	0	0	No	Yes	0	0	No	Yes	0
941	IR00696	0	0	0	0	0	No	Yes	0	0	No	Yes	0
942	IR00683	0	0	0	0	0.000317775	Yes	No	0	0	No	Yes	0
943	IR00679	0	0	0	0	0	No	Yes	0	0	No	Yes	0
944	IR00662	0	0	0	0	0	No	Yes	0	0	No	Yes	0
945	IR00642	0	0	92	0.201857	0.201924	No	No	0.20186	0.20186	No	No	0
946	IR00634	0	0	86	0	4.23701e-05	No	No	0	0	No	Yes	0
947	IR00633	0	0	0	0.0394937	0.0394996	No	No	0.039494	0.039494	No	No	0
948	IR00616	0	0	35	0.230453	0.230473	No	No	0.23045	0.23045	No	No	0
949	IR00614	0	0	0	0	0	No	Yes	0	0	No	Yes	0
950	IR00601	0	0	127	0.11263	0.112948	Yes	No	0.11263	0.11263	No	No	0
951	IR00599	0	0	0	0.106779	0.106785	No	No	0.10678	0.10678	No	No	0
952	IR00597	0	0	0	0	0.000564934	Yes	No	0	0	No	Yes	0
953	IR00589	0	0	74	0	0.00016948	Yes	No	0	0	No	Yes	0
954	IR00560	0	0	0	0	0	No	Yes	0	0	No	Yes	0
955	IR00559	0	0	81	6.39986e-25	2.23e-05	No	Yes	0	0	No	Yes	0
956	IR00556	0	0	116	0	0.000158888	Yes	No	0	0	No	Yes	0
957	IR00555	0	0	88	0	0.000158888	Yes	No	0	0	No	Yes	0
958	IR00552	0	0	116	0	0.000158888	Yes	No	0	0	No	Yes	0
959	IR00548	0	0	43	0.0190206	0.019032	No	No	0.019021	0.019021	No	No	0
960	IR00547	0	0	0	0	0.000317775	Yes	No	0	0	No	Yes	0
961	IR00544	0	0	119	0	1.23109e-05	No	No	0	0	No	Yes	0
962	IR00523	0	0	0	0	0.000363172	Yes	No	0	0	No	Yes	0
963	IR00522	0	0	0	0	0.0038031	Yes	No	0	0.0038031	Yes	No	0
964	IR00495	0	0	64	0	0	No	Yes	0	0	No	Yes	0
965	IR00491	0	0	64	0	0	No	Yes	0	0	No	Yes	0
966	IR00461	0	0	20	0.0530518	0.0530585	No	No	0.053052	0.053052	No	No	0
967	IR00455	0	0	0	0	0.000317775	Yes	No	0	0	No	Yes	0
968	IR00453	0	0	41	0	0	No	Yes	0	0	No	Yes	0
969	IR00444	0	0	0	0	0	No	Yes	0	0	No	Yes	0
970	IR00442	0	0	0	0	0	No	Yes	0	0	No	Yes	0
971	IR00414	0	0	42	0	0.000158888	Yes	No	0	0	No	Yes	0
972	IR00411	0	0	0	0	9.24437e-05	No	No	0	0	No	Yes	0
973	IR00406	0	0	0	0	0.000317775	Yes	No	0	0	No	Yes	0
974	IR00394	0	0	103	-2.06843e-32	0.128805	Yes	No	0	0.12872	Yes	No	0
975	IR00383	0	0	86	0	4.23701e-05	No	No	0	0	No	Yes	0
976	IR00356	0	0	0	0	0	No	Yes	0	0	No	Yes	0
977	IR00335	0	0	0	0	0	No	Yes	0	0	No	Yes	0
978	IR00331	0	0	0	0	0	No	Yes	0	0	No	Yes	0
979	IR00329	0	0	0	0	0	No	Yes	0	0	No	Yes	0
980	IR00325	0	0	88	0	0.000158888	Yes	No	0	0	No	Yes	0
981	IR00322	0	0	49	1.10487	1.10555	Yes	No	1.1052	1.1052	No	No	0
982	IR00318	0	0	0	0	0.000105925	Yes	No	0	0	No	Yes	0
983	IR00316	0	0	0	0.442307	0.44237	No	No	0.44231	0.44231	No	No	0
984	IR00314	0	0	0	0.110729	0.110888	Yes	No	0.11073	0.1108	No	No	0
985	IR00309	0	0	0	0	0.000158888	Yes	No	0	0	No	Yes	0
986	IR00307	0	0	0	-1.55169e-30	6.35551e-05	No	Yes	0	0	No	Yes	0
987	IR00296	0	0	0	0	0.000158888	Yes	No	0	0	No	Yes	0
988	IR00293	0	0	7	7.31365e-06	7.31366e-06	No	No	7.3137e-06	7.3137e-06	No	No	0
989	IR00283	0	0	31	0.170451	0.170457	No	No	0.17045	0.17045	No	No	0
990	IR00278	0	0	77	0	3.88123e-05	No	No	0	0	No	Yes	0
991	IR00275	0	0	0	0.0715797	0.072992	Yes	No	0.072427	0.072427	No	No	0
992	IR00267	0	0	0	0	0	No	Yes	0	0	No	Yes	0
993	IR00265	0	0	31	0.170451	0.170457	No	No	0.17045	0.17045	No	No	0
994	IR00255	7, 8, 9, 10	9	0	0	0	No	Yes	0	0	No	Yes	0
995	IR00254	0	0	0	2.08505e-05	0.000360926	Yes	No	4.3151e-05	4.3151e-05	No	No	0
996	IR00250	0	0	0	0	0.000105925	Yes	No	0	0	No	Yes	0
997	IR00246	0	0	99	5.73837e-24	0.000317775	Yes	No	0	0.00015406	Yes	No	0
998	IR00244	0	0	0	0	9.09595	Yes	No	0	9.0956	Yes	No	2
999	IR00241	0	0	44	0	0.00016948	Yes	No	0	0	No	Yes	0
1000	IR00235	0	0	85	0	3.71125e-05	No	No	0	0	No	Yes	0
1001	IR00230	0	0	101	0	3.68435e-05	No	No	0	0	No	Yes	0
1002	IR00226	0	0	0	0	0	No	Yes	0	0	No	Yes	0
1003	IR00224	0	0	20	0.0530518	0.0530585	No	No	0.053052	0.053052	No	No	0
1004	IR00222	0	0	0	0	0	No	Yes	0	0	No	Yes	0
1005	IR00193	0	0	0	0	0.00016948	Yes	No	0	0	No	Yes	0
1006	IR00178	0	0	0	0	0.000317775	Yes	No	0	0	No	Yes	0
1007	IR00156	0	0	87	7.31365e-07	7.31366e-07	No	No	7.3137e-07	7.3137e-07	No	No	0
1008	IR00149	0	0	128	0.819107	0.819743	Yes	No	0.81943	0.81943	No	No	0
1009	IR00144	0	0	0	0	0	No	Yes	0	0	No	Yes	0
1010	IR00141	0	0	0	0	0	No	Yes	0	0	No	Yes	0
1011	IR00139	0	0	0	0	0	No	Yes	0	0	No	Yes	0
1012	IR00138	0	0	62	0	0.00016948	Yes	No	0	0	No	Yes	0
1013	IR00125	0	0	130	0	0.000317775	Yes	No	0	0	No	Yes	0
1014	IR00122	0	0	0	0	0.000317775	Yes	No	0	0	No	Yes	0
1015	IR00120	0	0	0	2.00097	2.00128	Yes	No	2.001	2.001	No	No	0
1016	IR00116	0	0	0	0	0.000317775	Yes	No	0	0	No	Yes	0
1017	IR00114	0	0	7	7.31365e-06	7.31366e-06	No	No	7.3137e-06	7.3137e-06	No	No	0
1018	IR00095	0	0	0	0	6.35551e-05	No	No	0	3.762	Yes	No	0
1019	IR00094	0	0	7	4.31505e-05	4.31506e-05	No	No	4.3151e-05	4.3151e-05	No	No	0
1020	IR00074	0	0	7	0.000387623	0.000387624	No	No	0.00038762	0.00038762	No	No	0
1021	IR00064	0	0	0	0	0	No	Yes	0	0	No	Yes	0
1022	IR00059	0	0	87	7.31365e-07	7.31366e-07	No	No	7.3137e-07	7.3137e-07	No	No	0
1023	IR00048	0	0	7	7.31365e-06	7.31366e-06	No	No	7.3137e-06	7.3137e-06	No	No	0
1024	IR00028	0	0	87	2.92546e-06	2.92546e-06	No	No	2.9255e-06	2.9255e-06	No	No	0
1025	IR00019	0	0	0	0	0	No	Yes	0	0	No	Yes	0
1026	IR00015	0	0	0	0	0	No	Yes	0	0	No	Yes	0
1027	IR00013	0	0	0	0	0.000635551	Yes	No	0	0	No	Yes	0
1028	IR00009	0	0	0	0	0	No	Yes	0	0	No	Yes	0
1029	IR00007	0	0	0	0	0	No	Yes	0	0	No	Yes	0
1030	IR00006	0	0	0	0.114909	0.115385	Yes	No	0.11523	0.1153	No	No	0
1031	IR00001	0	0	0	5.98765	5.98797	Yes	No	5.9877	5.9877	No	No	0
1032	EX_EC9597	0	0	0	0	3.91048e-07	No	No	0	0	No	Yes	0
1033	EX_EC9596	0	0	126	0	7.3794e-08	No	No	0	0	No	Yes	0
1034	EX_EC9595	0	0	136	0	1.38542e-18	No	Yes	0	0	No	Yes	0
1035	EX_EC9594	0	0	136	0	9.70541e-19	No	Yes	0	0	No	Yes	0
1036	EX_EC9587	0	0	0	0	3.78868e-06	No	No	0	0	No	Yes	0
1037	EX_EC9583	0	0	0	0	4.36055e-07	No	No	0	0	No	Yes	0
1038	EX_EC9582	0	0	105	0	4.36055e-07	No	No	0	0	No	Yes	0
1039	EX_EC9536	0	0	0	0	0	No	Yes	0	0	No	Yes	0
1040	EX_EC9532	0	0	0	0	0	No	Yes	0	0	No	Yes	0
1041	EX_EC9527	0	0	0	0	0	No	Yes	0	0	No	Yes	0
1042	EX_EC9512	0	0	0	0	0	No	Yes	0	0	No	Yes	0
1043	EX_EC9489	0	0	119	0	6.15546e-06	No	No	0	0	No	Yes	0
1044	EX_EC9374	0	0	2	0	3.6737e-06	No	No	0	0	No	Yes	0
1045	EX_EC9324	0	0	7	0.731365	0.731366	No	No	0.73137	0.73137	No	No	0
1046	EX_EC9281	0	0	0	0	0	No	Yes	0	0	No	Yes	0
1047	EX_EC3994	0	0	0	0	0	No	Yes	0	0	No	Yes	0
1048	EX_EC3745	0	0	1	0	0	No	Yes	0	0	No	Yes	0
1049	EX_EC3638	0	0	0	0	0	No	Yes	0	0	No	Yes	0
1050	EX_EC3026	0	0	15	0	1.46273e-06	No	No	0	1.4602e-06	No	No	0
1051	EX_EC1919	0	0	0	0	0	No	Yes	0	0	No	Yes	0
1052	EX_EC1683	0	0	0	0	1.45269e-05	No	No	0	0	No	Yes	0
1053	EX_EC1610	0	0	5	0	1.14514e-05	No	No	0	0	No	Yes	0
1054	EX_EC1078	0	0	67	0	2.25974e-05	No	No	0	0	No	Yes	0
1055	EX_EC0994	0	0	0	0	0	No	Yes	0	0	No	Yes	0
1056	EX_EC0957	0	0	53	-7.86387	-7.86374	Yes	No	-7.8638	-0.33976	Yes	No	0
1057	EX_EC0954	0	0	0	0	0	No	Yes	0	0	No	Yes	0
1058	EX_EC0530	0	0	0	0	0	No	Yes	0	0	No	Yes	0
1059	EX_EC0518	0	0	79	0	0	No	Yes	0	0	No	Yes	0
1060	EX_EC0475	0	0	0	0	1.58888e-05	No	No	0	0	No	Yes	0
1061	EX_EC0382	0	0	0	0	0	No	Yes	0	0	No	Yes	0
1062	EX_EC0375	0	0	93	0	0	No	Yes	0	0	No	Yes	0
1063	EX_EC0359	0	0	57	0	2.30064e-05	No	No	0	0	No	Yes	0
1064	EX_EC0317	0	0	0	0	0	No	Yes	0	0	No	Yes	0
1065	EX_EC0309	0	0	41	0	0	No	Yes	0	0	No	Yes	0
1066	EX_EC0304	0	0	17	0	1.99388e-05	No	No	0	0	No	Yes	0
1067	EX_EC0303	0	0	117	0	0	No	Yes	0	0	No	Yes	0
1068	EX_EC0302	0	0	84	0	0	No	Yes	0	0	No	Yes	0
1069	EX_EC0300	0	0	0	0	0	No	Yes	0	0	No	Yes	0
1070	EX_EC0275	0	0	0	0	1.66157e-05	No	No	0	0	No	Yes	0
1071	EX_EC0262	0	0	0	0	0	No	Yes	0	0	No	Yes	0
1072	EX_EC0260	0	0	0	0	0	No	Yes	0	0	No	Yes	0
1073	EX_EC0258	0	0	131	0	0	No	Yes	0	0	No	Yes	0
1074	EX_EC0248	0	0	0	0	0	No	Yes	0	0	No	Yes	0
1075	EX_EC0236	0	0	0	0	0	No	Yes	0	0	No	Yes	0
1076	EX_EC0221	0	0	7	0.0365682	0.0365683	No	No	0.036568	0.036568	No	No	0
1077	EX_EC0214	0	0	0	0	1.45269e-05	No	No	0	0	No	Yes	0
1078	EX_EC0202	0	0	0	0	0	No	Yes	0	0	No	Yes	0
1079	EX_EC0201	0	0	0	0	0	No	Yes	0	0	No	Yes	0
1080	EX_EC0197	0	0	0	0	0	No	Yes	0	0	No	Yes	0
1081	EX_EC0179	0	0	133	0	0	No	Yes	0	0	No	Yes	0
1082	EX_EC0156	0	0	89	0	0	No	Yes	0	0	No	Yes	0
1083	EX_EC0154	0	0	104	0	0	No	Yes	0	0	No	Yes	0
1084	EX_EC0151	0	0	0	0	0	No	Yes	0	0	No	Yes	0
1085	EX_EC0148	0	0	64	0	0	No	Yes	0	0	No	Yes	0
1086	EX_EC0147	0	0	70	0	6.39689e-25	No	Yes	0	0	No	Yes	0
1087	EX_EC0144	0	0	0	0	0	No	Yes	0	0	No	Yes	0
1088	EX_EC0143	0	0	110	0	5.8174e-06	No	No	0	0	No	Yes	0
1089	EX_EC0134	0	0	0	0	1.70618e-05	No	No	0	0	No	Yes	0
1090	EX_EC0133	0	0	48	0	9.96942e-06	No	No	0	0	No	Yes	0
1091	EX_EC0129	0	0	112	0	0	No	Yes	0	0	No	Yes	0
1092	EX_EC0127	0	0	0	0	0	No	Yes	0	0	No	Yes	0
1093	EX_EC0126	0	0	0	0	0	No	Yes	0	0	No	Yes	0
1094	EX_EC0117	0	0	111	0	0	No	Yes	0	0	No	Yes	0
1095	EX_EC0116	0	0	0	0	1.40453e-05	No	No	0	0	No	Yes	0
1096	EX_EC0115	0	0	61	0	2.79363e-05	No	No	0	0	No	Yes	0
1097	EX_EC0105	0	0	0	0	0	No	Yes	0	0	No	Yes	0
1098	EX_EC0104	0	0	56	0	2.51703e-05	No	No	0	0	No	Yes	0
1099	EX_EC0103	0	0	123	0	0	No	Yes	0	0	No	Yes	0
1100	EX_EC0098	0	0	55	0	2.23e-05	No	No	0	4.804e-06	No	No	0
1101	EX_EC0096	0	0	0	0	0	No	Yes	0	0	No	Yes	0
1102	EX_EC0090	0	0	51	0	2.03376e-05	No	No	0	0	No	Yes	0
1103	EX_EC0083	0	0	135	0	0	No	Yes	0	0	No	Yes	0
1104	EX_EC0082	0	0	129	0	0	No	Yes	0	0	No	Yes	0
1105	EX_EC0080	0	0	118	0	0	No	Yes	0	0	No	Yes	0
1106	EX_EC0078	0	0	124	0	0	No	Yes	0	0	No	Yes	0
1107	EX_EC0073	0	0	98	0	0	No	Yes	0	0	No	Yes	0
1108	EX_EC0071	0	0	11	0	6.35551e-05	No	No	-3.762	0	Yes	No	0
1109	EX_EC0067	0	0	18	0	7.68037e-06	No	No	0	0	No	Yes	0
1110	EX_EC0065	0	0	0	6.73933	6.73946	Yes	No	-0.78465	6.7393	Yes	No	0
1111	EX_EC0064	0	0	78	0	7.34741e-06	No	No	0	0	No	Yes	0
1112	EX_EC0063	0	0	76	0	5.89838e-06	No	No	0	0	No	Yes	0
1113	EX_EC0062	0	0	0	0	6.39783e-25	No	Yes	0	0	No	Yes	0
1114	EX_EC0058	0	0	102	0	0	No	Yes	0	0	No	Yes	0
1115	EX_EC0056	0	0	0	0	0	No	Yes	0	0	No	Yes	0
1116	EX_EC0053	0	0	80	0	3.02643e-05	No	No	0	0	No	Yes	0
1117	EX_EC0052	0	0	115	0	0	No	Yes	0	0	No	Yes	0
1118	EX_EC0050	0	0	0	0	6.39761e-25	No	Yes	0	0	No	Yes	0
1119	EX_EC0048	0	0	31	-0.170457	-0.170451	No	No	-0.17045	-0.17045	No	No	0
1120	EX_EC0041	0	0	0	0	2.51703e-05	No	No	0	0	No	Yes	0
1121	EX_EC0039	0	0	109	0	0	No	Yes	0	0	No	Yes	0
1122	EX_EC0036	0	0	0	0	2.3323e-05	No	No	0	0	No	Yes	0
1123	EX_EC0035	0	0	0	0	0	No	Yes	0	0	No	Yes	0
1124	EX_EC0034	0	0	0	0	0	No	Yes	0	0	No	Yes	0
1125	EX_EC0033	0	0	46	0	0	No	Yes	0	0	No	Yes	0
1126	EX_EC0030	0	0	0	0	0	No	Yes	0	0	No	Yes	0
1127	EX_EC0029	0	0	36	0	4.79661e-05	No	No	0	0	No	Yes	0
1128	EX_EC0027	0	0	0	-10	-9.99999	No	No	-10	-10	No	No	0
1129	EX_EC0024	0	0	38	0	1.92591e-05	No	No	0	0	No	Yes	0
1130	EX_EC0023	0	0	0	0	1.72939e-05	No	No	0	0	No	Yes	0
1131	EX_EC0021	0	0	87	-7.31366e-07	-7.31365e-07	No	No	-7.3137e-07	-7.3137e-07	No	No	0
1132	EX_EC0020	0	0	22	0	3.345e-05	No	No	0	0	No	Yes	0
1133	EX_EC0011	0	0	47	30.1255	30.1256	Yes	No	30.126	33.888	Yes	No	0
1134	EX_EC0009	0	0	0	-0.668749	-0.668747	No	No	-0.66875	-0.66875	No	No	0
1135	EX_EC0007	0	0	75	-28.8848	-28.8847	No	No	-28.885	-28.885	No	No	0
1136	EX_EC0001	0	0	0	49.3394	49.3396	Yes	No	45.578	49.34	Yes	No	0

## Sheet: Yeast
S.No	Reaction name	Type III pathway number	Reactions fixed/blocked with each loop	Coupled Set number	Min_fva	Max_fva	Variability_fva	Zero_fva	Min_data	Max_data	Variability_data	Zero_data	PC_number
1	ASPTA	0	0	0	1.11752	1.11753	No	No	1.1175	1.1175	No	No	0
2	ASPKi	0	0	1	0.0679984	0.0680019	No	No	0.067998	0.068022	No	No	0
3	ASNS1	0	0	2	0.120688	0.120688	No	No	0.12069	0.12069	No	No	0
4	ASADi	0	0	1	0.0679984	0.0680019	No	No	0.067998	0.068022	No	No	0
5	ALATA_Lm	0	0	0	1.07855	1.07859	No	No	1.0785	1.0788	No	No	0
6	ALATA_L	0	0	0	0	3.16871e-05	No	No	0	0.00029411	No	No	0
7	PPCK	0	0	0	0	1.05624e-05	No	No	0	0	No	Yes	0
8	PC	0	0	0	1.88199	1.88201	No	No	1.882	1.882	No	No	0
9	ME2m	0	0	0	0	1.05624e-05	No	No	0	0	No	Yes	0
10	ICL	0	0	0	0.534092	0.534124	No	No	0.53405	0.53435	No	No	0
11	FBP	0	0	0	0	1.05624e-05	No	No	0	0	No	Yes	0
12	P5CR	0	0	2	0.195451	0.195451	No	No	0.19545	0.19545	No	No	0
13	ORNTACim	0	0	2	0.190704	0.190704	No	No	0.1907	0.1907	No	No	0
14	OCBTi	0	0	2	0.190704	0.190704	No	No	0.1907	0.1907	No	No	0
15	GLU5K	0	0	2	0.195451	0.195451	No	No	0.19545	0.19545	No	No	0
16	G5SD	0	0	2	0.195451	0.195451	No	No	0.19545	0.19545	No	No	0
17	G5SADr	0	0	2	0.195451	0.195451	No	No	0.19545	0.19545	No	No	0
18	CBPS	0	0	2	0.190704	0.190704	No	No	0.1907	0.1907	No	No	0
19	ARGSSr	0	0	2	0.190704	0.190704	No	No	0.1907	0.1907	No	No	0
20	ARGSL	0	0	2	0.190704	0.190704	No	No	0.1907	0.1907	No	No	0
21	AGPRim	0	0	2	0.190704	0.190704	No	No	0.1907	0.1907	No	No	0
22	ACOTAim	0	0	2	0.190704	0.190704	No	No	0.1907	0.1907	No	No	0
23	ACGKm	0	0	2	0.190704	0.190704	No	No	0.1907	0.1907	No	No	0
24	SUCOAS1m	0	0	3	-5.62203	-5.62202	No	No	-5.622	-5.622	No	No	0
25	SUCD2_u6m	0	0	0	6.15611	6.15614	No	No	6.156	6.1563	No	No	0
26	ICDHy	0	0	0	3.90304	3.90304	No	No	3.903	3.9031	No	No	0
27	ICDHxm	0	0	0	2.928	2.928	No	No	2.928	2.928	No	No	0
28	CSm	0	0	0	7.36513	7.36516	No	No	7.3651	7.3654	No	No	0
29	AKGDam	0	0	3	5.62202	5.62203	No	No	5.622	5.622	No	No	0
30	ACONTm	1	1	0	0	0	No	Yes	0	0	No	Yes	0
31	ACONT	0	0	0	7.36513	7.36516	No	No	7.3651	7.3654	No	No	0
32	SULR	0	0	2	0.0679984	0.0679984	No	No	0.067998	0.067998	No	No	0
33	SLFAT	0	0	2	0.0679984	0.0679984	No	No	0.067998	0.067998	No	No	0
34	PAPSR	0	0	2	0.0679984	0.0679984	No	No	0.067998	0.067998	No	No	0
35	BPNT	0	0	2	0.0679984	0.0679984	No	No	0.067998	0.067998	No	No	0
36	ADSK	0	0	2	0.0679984	0.0679984	No	No	0.067998	0.067998	No	No	0
37	MTHFR3	0	0	2	0.0612104	0.0612104	No	No	0.06121	0.06121	No	No	0
38	MTHFD	0	0	4	0.309293	0.309325	No	No	0.30907	0.30936	No	No	0
39	MTHFC	0	0	4	0.309293	0.309325	No	No	0.30907	0.30936	No	No	0
40	FTHFL	0	0	0	0.00194887	0.00198056	No	No	0.0019106	0.002208	No	No	0
41	GLUDy	0	0	0	6.91008	6.91011	No	No	6.9098	6.9101	No	No	0
42	GLNS	0	0	0	0.970134	0.970144	No	No	0.97013	0.97023	No	No	0
43	ANS	0	0	2	0.0337025	0.0337025	No	No	0.033702	0.033703	No	No	0
44	GLYK	0	0	0	0	1.05624e-05	No	No	0	1.0459e-27	No	Yes	0
45	G3PT	0	0	0	0	1.05624e-05	No	No	0	7.2398e-28	No	Yes	0
46	G3PD1ir	0	0	0	0.000293117	0.000293899	No	No	0.00029312	0.00029312	No	No	0
47	ALCD2m	0	0	5	-23.62	14.5574	Yes	No	-23.615	14.557	Yes	No	1
48	PSP_L	0	0	6	0.636471	0.636502	No	No	0.63624	0.63654	No	No	0
49	PSERT	0	0	6	0.636471	0.636502	No	No	0.63624	0.63654	No	No	0
50	PGCD	0	0	6	0.636471	0.636502	No	No	0.63624	0.63654	No	No	0
51	HSK	0	0	7	0	3.52079e-06	No	No	0	2.3328e-05	No	No	0
52	HSDyi	0	0	1	0.0679984	0.0680019	No	No	0.067998	0.068022	No	No	0
53	GHMT2r	0	0	0	0.374775	0.374807	No	No	0.37455	0.37485	No	No	0
54	CYSTS	0	0	2	0.00783227	0.00783227	No	No	0.0078323	0.0078323	No	No	0
55	TPI	0	0	0	6.71894	6.71895	No	No	6.7189	6.7189	No	No	0
56	PYK	0	0	0	12.5098	12.5098	No	No	12.51	12.51	No	No	0
57	PGM	0	0	8	13.1371	13.1371	No	No	13.137	13.137	No	No	0
58	PGK	0	0	9	13.7736	13.7736	No	No	13.774	13.774	No	No	0
59	PGI	0	0	0	6.7609	6.76092	No	No	6.7608	6.7609	No	No	0
60	PFK	0	0	0	6.71923	6.71925	No	No	6.7192	6.7192	No	No	0
61	PDHm	0	0	0	7.36513	7.36516	No	No	7.3651	7.3654	No	No	0
62	HEX1	0	0	10	10	10	No	No	10	10	No	No	0
63	GAPD	0	0	9	13.7736	13.7736	No	No	13.774	13.774	No	No	0
64	FBA	0	0	0	6.71923	6.71924	No	No	6.7192	6.7192	No	No	0
65	ENO	0	0	8	13.1371	13.1371	No	No	13.137	13.137	No	No	0
66	PRPPS	0	0	2	0.112381	0.112381	No	No	0.11238	0.11238	No	No	0
67	PRMICIi	0	0	2	0.0786787	0.0786787	No	No	0.078679	0.078679	No	No	0
68	PRATPP	0	0	2	0.0786787	0.0786787	No	No	0.078679	0.078679	No	No	0
69	PRAMPC	0	0	2	0.0786787	0.0786787	No	No	0.078679	0.078679	No	No	0
70	IGPDH	0	0	2	0.0786787	0.0786787	No	No	0.078679	0.078679	No	No	0
71	IG3PS	0	0	2	0.0786787	0.0786787	No	No	0.078679	0.078679	No	No	0
72	HSTPT	0	0	2	0.0786787	0.0786787	No	No	0.078679	0.078679	No	No	0
73	HISTP	0	0	2	0.0786787	0.0786787	No	No	0.078679	0.078679	No	No	0
74	HISTD	0	0	2	0.0786787	0.0786787	No	No	0.078679	0.078679	No	No	0
75	ATPPRT	0	0	2	0.0786787	0.0786787	No	No	0.078679	0.078679	No	No	0
76	FDH	0	0	0	0.000630198	0.000661885	No	No	0.00040275	0.00070014	No	No	0
77	METS	0	0	2	0.0612104	0.0612104	No	No	0.06121	0.06121	No	No	0
78	HSERTA	0	0	2	0.0679984	0.0679984	No	No	0.067998	0.067998	No	No	0
79	CYSTGL	0	0	2	0.00783227	0.00783227	No	No	0.0078323	0.0078323	No	No	0
80	AHSERL2	0	0	2	0.0679984	0.0679984	No	No	0.067998	0.067998	No	No	0
81	ADK1m	0	0	11	0	6.33742e-06	No	No	0	1.654e-05	No	No	0
82	ADK1	0	0	0	2.02787	2.02787	No	No	2.0279	2.0279	No	No	0
83	PPAm	0	0	11	0	6.33742e-06	No	No	0	1.654e-05	No	No	0
84	PPA	0	0	0	4.28116	4.28116	No	No	4.2812	4.2812	No	No	0
85	NADH2-u6m	0	0	0	0	38.1773	Yes	No	0.0050304	38.177	Yes	No	1
86	NADH2-u6cm	0	0	0	0	38.1773	Yes	No	0	38.172	Yes	No	1
87	MDHm	0	0	0	7.36513	7.36516	No	No	7.3651	7.3654	No	No	0
88	MDH	0	0	0	-0.764488	-0.764471	No	No	-0.76448	-0.76445	No	No	0
89	FUMm	0	0	0	5.62202	6.15614	Yes	No	5.6221	6.1563	Yes	No	0
90	FUM	0	0	0	0.444541	0.978665	Yes	No	0.44454	0.97855	Yes	No	0
91	CYOR_u6m	0	0	12	44.3334	44.3334	No	No	44.333	44.333	No	No	0
92	CYOOm	0	0	12	22.1667	22.1667	No	No	22.167	22.167	No	No	0
93	ATPS3m	0	0	12	66.5001	66.5001	No	No	66.5	66.5	No	No	0
94	TKT2	0	0	0	0.301705	0.301712	No	No	0.3017	0.30176	No	No	0
95	TKT1	0	0	13	0.615352	0.615359	No	No	0.61535	0.6154	No	No	0
96	TALA	0	0	13	0.615352	0.615359	No	No	0.61535	0.6154	No	No	0
97	RPI	0	0	0	0.975281	0.975287	No	No	0.97528	0.97533	No	No	0
98	RPE	0	0	0	0.917058	0.91707	No	No	0.91705	0.91716	No	No	0
99	PGL	0	0	14	1.89234	1.89236	No	No	1.8923	1.8925	No	No	0
100	GND	0	0	14	1.89234	1.89236	No	No	1.8923	1.8925	No	No	0
101	G6PDH2	0	0	14	1.89234	1.89236	No	No	1.8923	1.8925	No	No	0
102	PYRDC	0	0	0	1.19173	1.19174	No	No	1.1917	1.1918	No	No	0
103	ALCD2x	0	0	0	-14.5574	23.62	Yes	No	-14.557	23.615	Yes	No	1
104	ACSm	0	0	11	0	6.33742e-06	No	No	0	1.654e-05	No	No	0
105	ACS	0	0	0	0.811751	0.811757	No	No	0.81175	0.81178	No	No	0
106	ACOAH	0	0	0	0	5.28118e-06	No	No	0	0	No	Yes	0
107	THRS	0	0	7	0	3.52079e-06	No	No	0	2.3328e-05	No	No	0
108	THRD_Lm	0	0	2	0.220846	0.220846	No	No	0.22085	0.22085	No	No	0
109	THRA	0	0	0	0.447979	0.447982	No	No	0.44796	0.44798	No	No	0
110	SACCD2	0	0	2	0.339636	0.339636	No	No	0.33964	0.33964	No	No	0
111	SACCD1	0	0	2	0.339636	0.339636	No	No	0.33964	0.33964	No	No	0
112	OXAGm	0	0	2	0.339636	0.339636	No	No	0.33964	0.33964	No	No	0
113	MCITDm	0	0	2	0.339636	0.339636	No	No	0.33964	0.33964	No	No	0
114	HICITDm	0	0	2	0.339636	0.339636	No	No	0.33964	0.33964	No	No	0
115	HACNHm	0	0	2	0.339636	0.339636	No	No	0.33964	0.33964	No	No	0
116	AATA	0	0	2	0.339636	0.339636	No	No	0.33964	0.33964	No	No	0
117	AASAD1	0	0	2	0.339636	0.339636	No	No	0.33964	0.33964	No	No	0
118	TYRTA	0	0	2	0.121044	0.121044	No	No	0.12104	0.12104	No	No	0
119	TRPS1	0	0	2	0.0337025	0.0337025	No	No	0.033702	0.033703	No	No	0
120	SHKK	0	0	2	0.313647	0.313647	No	No	0.31365	0.31365	No	No	0
121	SHK3D	0	0	2	0.313647	0.313647	No	No	0.31365	0.31365	No	No	0
122	PSCVTi	0	0	2	0.313647	0.313647	No	No	0.31365	0.31365	No	No	0
123	PRAIi	0	0	2	0.0337025	0.0337025	No	No	0.033702	0.033703	No	No	0
124	PPNDH	0	0	2	0.1589	0.1589	No	No	0.1589	0.1589	No	No	0
125	PPND2	0	0	2	0.121044	0.121044	No	No	0.12104	0.12104	No	No	0
126	PHETA1	0	0	2	0.1589	0.1589	No	No	0.1589	0.1589	No	No	0
127	IGPS	0	0	2	0.0337025	0.0337025	No	No	0.033702	0.033703	No	No	0
128	DHQTi	0	0	2	0.313647	0.313647	No	No	0.31365	0.31365	No	No	0
129	DHQS	0	0	2	0.313647	0.313647	No	No	0.31365	0.31365	No	No	0
130	DDPA	0	0	2	0.313647	0.313647	No	No	0.31365	0.31365	No	No	0
131	CHORS	0	0	2	0.313647	0.313647	No	No	0.31365	0.31365	No	No	0
132	CHORM	0	0	2	0.279944	0.279944	No	No	0.27994	0.27994	No	No	0
133	ANPRT	0	0	2	0.0337025	0.0337025	No	No	0.033702	0.033703	No	No	0
134	ALDD2ym	0	0	0	0	3.16871e-05	No	No	0	0.00029641	No	No	0
135	ALDD2y	0	0	0	0.743721	0.743759	No	No	0.74345	0.74378	No	No	0
136	ALDD2xm	0	0	0	0	3.16871e-05	No	No	0	0.0003034	No	No	0
137	VALTA	0	0	2	0.314003	0.314003	No	No	0.314	0.314	No	No	0
138	OMCDC	0	0	2	0.35174	0.35174	No	No	0.35174	0.35174	No	No	0
139	LEUTA	0	0	2	0.35174	0.35174	No	No	0.35174	0.35174	No	No	0
140	KARA2im	0	0	2	0.228679	0.228679	No	No	0.22868	0.22868	No	No	0
141	KARA1im	0	0	2	0.665743	0.665743	No	No	0.66574	0.66574	No	No	0
142	IPPS	0	0	2	0.35174	0.35174	No	No	0.35174	0.35174	No	No	0
143	IPPMIb	0	0	2	0.35174	0.35174	No	No	0.35174	0.35174	No	No	0
144	IPPMIa	0	0	2	0.35174	0.35174	No	No	0.35174	0.35174	No	No	0
145	IPMD	0	0	2	0.35174	0.35174	No	No	0.35174	0.35174	No	No	0
146	ILETA	0	0	2	0.228679	0.228679	No	No	0.22868	0.22868	No	No	0
147	DHAD2m	0	0	2	0.228679	0.228679	No	No	0.22868	0.22868	No	No	0
148	DHAD1m	0	0	2	0.665743	0.665743	No	No	0.66574	0.66574	No	No	0
149	ACLSm	0	0	2	0.665743	0.665743	No	No	0.66574	0.66574	No	No	0
150	ACHBSm	0	0	2	0.228679	0.228679	No	No	0.22868	0.22868	No	No	0
151	GLUSxm	0	0	15	0	1.05624e-05	No	No	0	9.8031e-05	No	No	0
152	AGTm	0	0	16	0.534092	0.534124	No	No	0.53405	0.53435	No	No	0
153	HCITS	0	0	2	0.339636	0.339636	No	No	0.33964	0.33964	No	No	0
154	MALS	0	0	0	0	6.33742e-06	No	No	0	2.8223e-05	No	No	0
155	GLUDym	0	0	0	1.08509	1.08513	No	No	1.0848	1.0851	No	No	0
156	CSc	0	0	0	0	6.33742e-06	No	No	0	0	No	Yes	0
157	SUCCt2r	0	0	17	0	8.44989e-07	No	No	0	0	No	Yes	0
158	SO4ti	0	0	2	0.0917325	0.0917325	No	No	0.091732	0.091733	No	No	0
159	PYRt2	0	0	18	0	1.24263e-06	No	No	0	0	No	Yes	0
160	PIt2r	0	0	2	0.213348	0.213348	No	No	0.21335	0.21335	No	No	0
161	O2t	0	0	19	22.2605	22.2605	No	No	22.26	22.261	No	No	0
162	NH4t	0	0	2	6.62233	6.62233	No	No	6.6223	6.6223	No	No	0
163	H2Ot	0	0	20	-13.3822	-13.3822	No	No	-13.382	-13.382	No	No	0
164	GLYCt	0	0	21	0	7.82397e-07	No	No	0	0	No	Yes	0
165	GLCt1	0	0	10	10	10	No	No	10	10	No	No	0
166	ETOHt	0	0	22	0	1.05624e-06	No	No	0	0	No	Yes	0
167	CO2t	0	0	23	22.6344	22.6344	No	No	22.634	22.634	No	No	0
168	ATPS	0	0	0	0	1.05624e-05	No	No	0	0	No	Yes	0
169	ACt2r	0	0	24	0	1.58435e-06	No	No	0	0	No	Yes	0
170	THRt2m	0	0	2	0.220846	0.220846	No	No	0.22085	0.22085	No	No	0
171	SUCFUMtm	0	0	0	0	0.534124	Yes	No	0	0.53401	Yes	No	0
172	SUCCtm	0	0	0	0	0.534124	Yes	No	8.2877e-05	0.53435	Yes	No	0
173	PYRt2m	0	0	0	9.46976	9.46979	No	No	9.4697	9.47	No	No	0
174	PIt2m	0	0	0	69.2374	69.2375	No	No	69.237	69.237	No	No	0
175	ORNt3m	0	0	2	0.190704	0.190704	No	No	0.1907	0.1907	No	No	0
176	OAAt2m	1	1	0	0	0	No	Yes	0	0	No	Yes	0
177	O2tm	0	0	12	22.1667	22.1667	No	No	22.167	22.167	No	No	0
178	NH4tm	0	0	0	-1.30597	-1.30594	No	No	-1.306	-1.3057	No	No	0
179	MALtm	0	0	0	-3.22814	-2.69401	Yes	No	-3.2283	-2.6941	Yes	No	0
180	H2Otm	0	0	0	-80.5065	-79.9723	Yes	No	-80.506	-79.972	Yes	No	0
181	GLYt2m	0	0	16	-0.534124	-0.534092	No	No	-0.53435	-0.53405	No	No	0
182	GLUt2m	0	0	0	2.54508	2.54509	No	No	2.545	2.5451	No	No	0
183	ETOHtm	0	0	5	-23.62	14.5574	Yes	No	-23.615	14.557	Yes	No	1
184	CO2tm	0	0	0	17.1492	17.1492	No	No	17.149	17.149	No	No	0
185	CITtcm	1	1	0	-2.928	-2.928	No	No	-2.928	-2.928	No	No	0
186	CITtam	0	0	0	-4.43716	-4.43713	No	No	-4.4374	-4.4371	No	No	0
187	ATPtm-H	0	0	0	71.9315	71.9315	No	No	71.931	71.932	No	No	0
188	ACtm	0	0	0	-3.16871e-05	6.33742e-06	No	No	-0.0003034	1.654e-05	No	No	0
189	3MOPtm	0	0	2	0.228679	0.228679	No	No	0.22868	0.22868	No	No	0
190	3MOBtm	0	0	2	0.665743	0.665743	No	No	0.66574	0.66574	No	No	0
191	2OXOADPtim	0	0	2	0.339636	0.339636	No	No	0.33964	0.33964	No	No	0
192	GLNt2m	0	0	15	0	1.05624e-05	No	No	0	9.8031e-05	No	No	0
193	2OBUTtm	0	0	2	0.00783227	0.00783227	No	No	0.0078323	0.0078323	No	No	0
194	ALAt2m	0	0	0	-0.544462	-0.54443	No	No	-0.54446	-0.54417	No	No	0
195	HCITtm	0	0	2	0.339636	0.339636	No	No	0.33964	0.33964	No	No	0
196	GLXtm	0	0	16	0.534092	0.534124	No	No	0.53405	0.53435	No	No	0
197	ACALDtm	0	0	0	-14.5574	23.62	Yes	No	-14.557	23.615	Yes	No	1
198	ac[e]_EX	0	0	24	0	1.58435e-06	No	No	0	0	No	Yes	0
199	co2[e]_EX	0	0	23	22.6344	22.6344	No	No	22.634	22.634	No	No	0
200	etoh[e]_EX	0	0	22	0	1.05624e-06	No	No	0	0	No	Yes	0
201	glc-D[e]_EX	0	0	10	10	10	No	No	10	10	No	No	0
202	glyc[e]_EX	0	0	21	0	7.82397e-07	No	No	0	0	No	Yes	0
203	h2o[e]_EX	0	0	20	13.3822	13.3822	No	No	13.382	13.382	No	No	0
204	nh4[e]_EX	0	0	2	6.62233	6.62233	No	No	6.6223	6.6223	No	No	0
205	o2[e]_EX	0	0	19	22.2605	22.2605	No	No	22.26	22.261	No	No	0
206	pi[e]_EX	0	0	2	0.213348	0.213348	No	No	0.21335	0.21335	No	No	0
207	pyr[e]_EX	0	0	18	0	1.24263e-06	No	No	0	0	No	Yes	0
208	so4[e]_EX	0	0	2	0.0917325	0.0917325	No	No	0.091732	0.091733	No	No	0
209	succ[e]_EX	0	0	17	0	8.44989e-07	No	No	0	0	No	Yes	0
210	aicarSYN	0	0	2	0.116297	0.116297	No	No	0.1163	0.1163	No	No	0
211	ampSYN	0	0	2	0.137539	0.137539	No	No	0.13754	0.13754	No	No	0
212	dampSYN	0	0	2	0.00427215	0.00427215	No	No	0.0042721	0.0042721	No	No	0
213	gmpSYN	0	0	2	0.0574367	0.0574367	No	No	0.057437	0.057437	No	No	0
214	dgmpSYN	0	0	2	0.0028481	0.0028481	No	No	0.0028481	0.0028481	No	No	0
215	umpSYN	0	0	2	0.13125	0.13125	No	No	0.13125	0.13125	No	No	0
216	cmpSYN	0	0	2	0.0601661	0.0601661	No	No	0.060166	0.060166	No	No	0
217	dcmpSYN	0	0	2	0.00712025	0.00712025	No	No	0.0071202	0.0071202	No	No	0
218	dtmpSYN	0	0	2	0.00427215	0.00427215	No	No	0.0042721	0.0042721	No	No	0
219	13BDglcnSYN	0	0	2	1.34668	1.34668	No	No	1.3467	1.3467	No	No	0
220	mannanSYN	0	0	2	0.958741	0.958741	No	No	0.95874	0.95874	No	No	0
221	zymstSYN	0	0	2	0.00261076	0.00261076	No	No	0.0026108	0.0026108	No	No	0
222	ergstSYN	0	0	2	0.000830696	0.000830696	No	No	0.0008307	0.0008307	No	No	0
223	paSYN	0	0	2	0.000293117	0.000293117	No	No	0.00029312	0.00029312	No	No	0
224	psSYN	0	0	2	0.000144778	0.000144778	No	No	0.00014478	0.00014478	No	No	0
225	peSYN	0	0	2	0.000124604	0.000124604	No	No	0.0001246	0.0001246	No	No	0
226	pcSYN	0	0	2	7.12025e-05	7.12025e-05	No	No	7.1202e-05	7.1202e-05	No	No	0
227	ptd1inoSYN	0	0	2	6.28955e-05	6.28955e-05	No	No	6.2895e-05	6.2896e-05	No	No	0
228	triglycSYN	0	0	2	7.83227e-05	7.83227e-05	No	No	7.8323e-05	7.8323e-05	No	No	0
229	biomass	0	0	0	1.18671	1.18671	No	No	1.1867	1.1867	No	No	0
