# Supplementary material for: Characterizing the optimal flux space of genome-scale metabolic reconstructions through modified latin-hypercube sampling
Source: Royal Society of Chemistry journal article supplement (doi:10.1039/c5mb00457h), 2016-01-11
Supplement: c5mb00457h4.xlsx [file c5mb00457h4.xlsx]

## Sheet: iMO1086_PC loadings
2.22932e-35	2.74809e-34	-4.36604e-34	-1.24009e-33	-6.79801e-34	4.13741e-34	1.40039e-34	-2.73289e-34	9.62413e-34	1.29247e-32	-6.13119e-32	6.04524e-32	1.76958e-31	-7.53491e-32	-4.51001e-31	1.54717e-33	-2.28011e-30	1.1905e-29	-1.23455e-29	-9.32131e-30	-2.82958e-30	2.00183e-29	1.29205e-29	-2.78865e-29	-1.51491e-29	-3.78371e-29	1.33712e-28	1.59923e-30	-1.36245e-28	-8.70671e-29	2.13909e-28	2.50519e-29	1.16969e-29	1.28957e-28	1.39039e-29	-5.04168e-29	-2.53136e-28	-6.46946e-28	-4.71303e-28	5.54028e-28	-3.05546e-28	-1.42905e-28	-2.40299e-28	2.7735e-29	5.83938e-28	4.52672e-28	5.78603e-28	7.61282e-28	1.0481e-27	1.47692e-27
-9.97699e-17	-7.82118e-16	3.93153e-16	7.85757e-16	4.86628e-16	-1.47983e-16	-9.89169e-17	4.89154e-16	-5.99248e-15	-5.44719e-15	-1.0819e-14	5.35069e-14	-1.00426e-14	-7.03051e-14	-4.56153e-14	-1.04612e-13	-1.74208e-13	-3.01031e-13	3.49578e-13	-2.42125e-12	3.29783e-13	1.36166e-13	-8.86395e-13	5.30934e-12	-8.884e-12	3.72106e-12	7.65101e-12	6.10189e-12	-5.32676e-12	1.93524e-11	2.49901e-11	1.44146e-11	5.62475e-13	3.73354e-11	1.67654e-11	-1.84103e-11	-1.85499e-11	-2.05873e-11	2.80585e-11	4.4772e-11	-8.7091e-12	3.98572e-12	-1.78001e-11	-8.61539e-12	9.54993e-11	-8.5111e-11	1.80089e-10	1.05519e-10	1.0686e-10	1.92606e-10
-1.51392e-16	4.96785e-16	2.22745e-16	-5.02724e-16	-1.19604e-16	-3.19277e-17	9.51782e-18	5.35563e-16	3.57636e-14	-2.19487e-14	-2.75962e-14	-9.85613e-14	-1.35632e-16	5.1108e-14	1.09297e-13	5.76723e-13	-1.88067e-13	-1.71553e-12	-7.7367e-13	-2.89539e-12	5.14322e-12	4.74719e-12	-1.14993e-11	3.19498e-12	-5.31415e-12	6.47667e-12	8.74725e-12	1.57443e-11	4.9532e-12	-3.96037e-11	-7.63384e-11	-6.52783e-11	-6.06948e-11	-6.87657e-11	2.10269e-11	1.45465e-10	6.24876e-11	4.39445e-11	4.04192e-11	-2.04903e-11	-8.39791e-11	4.1532e-11	8.87421e-11	-3.83112e-11	-1.35826e-10	-2.72407e-10	7.67339e-10	2.52068e-10	2.80212e-10	2.33817e-10
-2.95516e-17	6.60762e-16	2.64411e-16	1.83172e-15	7.40505e-16	3.20927e-18	-6.02239e-16	4.6369e-16	7.39892e-15	-5.09393e-15	8.934e-15	-3.64955e-14	-8.23114e-15	2.68122e-14	-3.00226e-14	-1.05364e-13	-2.52737e-13	-4.29548e-14	5.68357e-13	1.09739e-12	4.64766e-13	-1.96657e-12	-9.09869e-13	2.31026e-12	-7.69751e-12	-5.15517e-12	9.56531e-12	1.02287e-12	2.06282e-11	-1.65696e-10	-6.26314e-11	-6.15413e-11	-3.82551e-11	-1.03066e-10	2.51391e-11	4.46318e-11	-7.19431e-12	-6.17038e-12	-4.3457e-11	1.08318e-10	-4.9817e-11	-6.18261e-11	-4.21351e-11	1.27594e-11	3.85979e-10	5.41854e-11	2.80047e-11	4.61573e-11	-2.1375e-10	8.67871e-11
-0.00016377	-9.62948e-05	-0.000996025	-0.00287817	0.00193282	-0.00122974	0.00501754	0.00315297	-0.498489	0.000849168	0.0380242	-9.1574e-05	0.00142237	0.00193693	-0.00239726	0.000424812	0.000748647	2.98401e-05	-1.58085e-05	-3.43123e-05	-4.1749e-05	4.19644e-05	-1.14028e-05	-8.054e-05	4.89629e-05	0.000100511	0.000108665	-5.21252e-05	4.14759e-05	-7.98145e-05	4.83503e-05	1.34011e-05	-0.00017701	-0.000243239	-0.000486873	0.000262244	-9.35005e-05	0.000216601	-0.000147441	0.00102676	0.00060509	-0.00118498	-0.000134496	-0.00100662	0.000391144	0.000286371	0.00131596	0.00238994	0.00160369	0.00105679
-2.04174e-21	4.18324e-18	9.21603e-18	-2.24709e-16	2.96147e-16	-2.36452e-16	-2.85026e-16	4.67568e-16	3.24327e-15	-5.46687e-17	-1.30843e-15	9.31886e-15	-6.03314e-16	-1.91619e-14	-2.30778e-15	6.44479e-15	2.56701e-14	2.45968e-13	5.86282e-13	-9.38715e-13	-9.07654e-13	6.34539e-13	-6.29481e-13	6.59001e-13	1.81641e-12	5.20191e-13	2.57963e-13	1.7749e-12	-5.7696e-12	-4.9847e-12	-1.07395e-11	-2.51998e-12	-8.41355e-13	-2.35924e-12	-1.54996e-12	6.7731e-12	9.40919e-12	2.50649e-12	-2.19086e-12	-2.04453e-11	8.84493e-12	1.50235e-13	4.24953e-12	4.65404e-13	1.34783e-12	3.47158e-11	5.29936e-12	1.69762e-11	1.96475e-11	1.81138e-11
-7.1961e-24	9.02848e-20	2.77248e-19	-5.32512e-17	1.15384e-16	-6.85844e-17	2.25324e-17	-3.43946e-16	-4.97557e-15	1.32304e-17	-4.84574e-15	-1.72454e-14	2.3007e-15	2.66452e-14	4.20766e-15	-3.6854e-16	-1.61625e-14	1.73614e-13	1.76156e-15	4.1966e-13	-7.79529e-13	-2.33447e-13	-2.97085e-13	-6.2246e-13	-2.36935e-13	1.0836e-12	3.2425e-12	-1.72854e-12	3.56904e-12	-4.4506e-12	-4.46807e-12	-8.31025e-12	-2.58783e-12	-9.07034e-12	-8.29166e-13	1.30596e-11	5.63453e-12	9.74497e-13	1.76732e-13	-5.18077e-12	-9.88095e-12	1.79261e-12	2.40861e-12	-3.04757e-12	-1.60121e-11	2.61014e-11	-1.75361e-11	-4.27676e-12	-1.44267e-11	-1.21812e-10
-1.24916e-26	9.92858e-22	4.32223e-21	-1.25688e-17	1.01961e-16	1.33358e-16	5.18571e-17	4.6822e-17	-3.21771e-15	-3.77454e-15	-7.38344e-16	-1.0688e-14	1.61382e-14	4.80764e-14	-4.87598e-15	-5.25723e-15	1.79058e-14	1.53122e-13	1.70692e-13	-2.99667e-13	4.10947e-13	-1.42862e-13	6.77551e-13	1.53646e-13	-1.12451e-12	-3.98943e-13	1.1761e-12	4.40833e-13	-5.26388e-12	1.67059e-11	9.52519e-12	5.86551e-12	3.01058e-12	1.3775e-11	-2.27979e-12	-3.64835e-12	9.04984e-13	1.74312e-12	9.42547e-12	-1.16933e-11	9.64494e-12	8.11289e-12	5.74334e-12	-3.08005e-12	-1.31496e-11	-2.83464e-11	6.28103e-12	-1.12611e-11	7.48369e-11	2.87582e-11
-3.74964e-29	1.35289e-23	6.84146e-23	2.78394e-18	-4.66639e-17	-9.2531e-17	1.606e-16	7.30851e-17	1.83821e-15	3.95692e-15	-7.04894e-15	-4.8401e-16	1.24671e-14	-4.6656e-14	1.47857e-14	1.11267e-14	1.66105e-13	1.81168e-12	-8.66188e-13	-1.28727e-12	9.43662e-14	1.07965e-12	1.77134e-12	-9.49793e-14	1.40585e-12	-3.69585e-12	-2.88844e-12	-2.27429e-12	-1.92316e-11	3.33457e-11	1.46253e-12	5.64942e-12	1.34951e-11	1.6874e-11	4.11857e-13	-2.93134e-12	-1.06991e-12	-2.54888e-11	3.45209e-11	-9.4724e-12	-7.88526e-12	2.42201e-11	2.21823e-11	-5.12124e-12	-1.49187e-11	-2.52879e-12	-6.74494e-11	3.39641e-11	1.29815e-10	-1.41608e-10
1.16035e-29	-3.9717e-24	-3.26492e-23	3.5464e-18	-5.12947e-17	-9.57658e-17	1.32724e-16	5.19995e-17	-1.89905e-15	-1.7413e-15	-6.2417e-15	-3.56021e-14	-1.48251e-15	2.31466e-14	-1.86313e-14	4.32686e-14	-1.00515e-15	-1.11405e-13	-6.38125e-13	-2.43335e-13	2.64212e-13	2.96215e-13	2.15409e-12	-1.52058e-12	-2.14293e-12	-4.23912e-12	-3.05507e-12	9.71928e-13	-6.35294e-12	4.04198e-11	2.02737e-11	1.52368e-11	4.52282e-12	2.37163e-11	-6.39094e-12	-1.13689e-11	4.12713e-12	-5.37494e-12	1.82481e-11	-1.69319e-11	3.37526e-12	1.53225e-11	2.15892e-11	-4.36216e-12	-8.231e-11	-5.32704e-11	1.48366e-12	-6.53194e-11	4.24647e-11	-1.25964e-10
-0.00368882	0.000206773	-0.00296971	0.0122693	-0.0142525	0.00618571	-0.00199251	0.2285	0.00126727	-0.000198403	-0.000332382	-1.14553e-05	0.000143436	-0.000296011	4.62198e-07	3.79793e-06	-5.41771e-05	-0.00822042	0.0379885	-0.022476	-0.00884588	0.0160856	0.0237315	0.011375	0.042281	-0.0850162	-0.0809045	0.0035946	-0.00105688	0.086219	-0.205528	0.0382529	0.0864134	-0.0200728	0.155447	-0.093488	0.0070414	-0.108504	-0.045326	-0.208847	-0.0680609	0.304495	-0.0942428	0.0336014	0.0710493	-0.00420283	-0.0032344	0.00158797	0.00308387	-0.0138795
9.26872e-29	2.87867e-28	1.91082e-28	-4.4672e-25	8.47127e-24	1.81377e-23	-5.22269e-23	-4.89936e-23	-1.51761e-15	4.74488e-15	1.646e-15	-3.42934e-16	-8.77302e-15	-1.07238e-14	1.46344e-14	1.65877e-14	5.3496e-14	7.5394e-13	-3.37387e-13	1.71728e-13	-4.89351e-13	-7.16244e-13	-7.03124e-13	7.61669e-13	1.86183e-12	3.93679e-13	-2.41306e-13	1.65895e-12	-3.29391e-12	5.84128e-12	-7.9942e-12	4.48775e-12	3.43202e-13	8.82397e-12	4.01085e-12	-1.05136e-11	1.10186e-12	-1.09329e-11	-5.97885e-12	8.45241e-12	4.05366e-12	-8.52677e-12	-6.40495e-12	1.10228e-11	-2.05903e-11	2.13228e-11	3.45759e-11	-2.11482e-12	-3.90387e-11	-2.19226e-11
-5.16751e-30	-1.59775e-29	-1.07007e-29	6.41877e-29	-1.67197e-28	-2.05303e-28	1.01107e-27	4.2752e-27	7.5939e-18	-6.21928e-17	-3.06039e-17	-1.21662e-14	-1.62391e-15	9.53505e-15	5.54907e-15	1.76579e-14	1.02063e-14	4.51913e-13	-1.16364e-13	2.52006e-13	-2.41832e-13	-1.30855e-13	-4.43142e-13	3.67145e-13	6.78552e-13	-6.79188e-13	3.01599e-13	-3.86653e-15	-2.58323e-12	1.84079e-11	2.87425e-12	2.22636e-12	1.24672e-12	1.10023e-11	7.96785e-13	2.90306e-12	-3.75035e-12	3.60895e-13	-5.59991e-13	-6.44293e-12	3.26121e-12	4.75141e-12	6.7086e-12	7.30959e-13	-1.98137e-11	-1.18979e-11	1.75165e-11	-1.80518e-12	-8.61575e-12	-9.35841e-12
-6.08976e-29	-1.90296e-28	-1.21014e-28	7.23515e-28	-7.44893e-28	4.29285e-28	2.47437e-28	3.44537e-26	1.20546e-22	-2.55893e-21	-1.77426e-21	1.92302e-15	-2.97986e-15	-5.09496e-15	-4.81018e-16	-1.47507e-14	1.83678e-15	1.57002e-14	1.20834e-13	-2.07148e-13	1.8073e-13	-1.06403e-13	3.01177e-13	-1.87142e-13	2.04801e-13	6.36175e-13	-2.0284e-13	-3.07067e-13	9.75412e-13	-1.24358e-11	-3.82345e-12	-1.99501e-12	-1.73016e-13	-7.14437e-12	-7.65124e-13	-3.12098e-12	2.61075e-12	-7.08343e-12	-4.45247e-12	1.10073e-11	-3.824e-12	-5.50477e-12	-5.74891e-12	2.02942e-12	1.04144e-11	3.04784e-11	-3.18994e-11	-1.92928e-14	-4.70821e-12	-3.35713e-11
-2.55985e-30	-7.99696e-30	-5.08952e-30	3.04097e-29	-3.13123e-29	1.80633e-29	1.0407e-29	1.44857e-27	1.17402e-24	-6.39795e-23	-6.21338e-23	-2.4335e-15	2.05174e-15	1.0942e-14	-2.10762e-15	1.1401e-14	5.41202e-15	3.89542e-14	-8.67097e-14	3.95119e-13	-2.79903e-13	1.30364e-13	-6.05837e-13	1.75251e-13	-2.725e-13	-8.74877e-13	8.31682e-13	1.23179e-13	4.1869e-13	1.20575e-11	3.62611e-12	1.02992e-12	-1.78697e-12	5.91157e-12	1.87529e-12	5.98633e-12	-3.15446e-12	5.9536e-12	-5.49483e-13	-9.33129e-12	9.66005e-13	3.7039e-12	6.03416e-12	-2.08688e-12	-9.49911e-12	-2.13848e-11	3.45417e-11	4.54978e-12	-1.0625e-11	-8.92668e-14
-1.57708e-30	1.37233e-30	-1.26178e-29	2.33815e-29	-1.66152e-29	-2.02022e-29	-1.14732e-29	-2.40761e-29	-1.60692e-27	1.53817e-25	2.09803e-25	2.15219e-15	-1.32015e-15	5.76711e-15	-1.61493e-15	3.88805e-14	1.96437e-15	-9.18838e-14	-5.02351e-13	1.53402e-13	-6.92949e-13	3.5348e-13	-9.8808e-13	-4.56982e-13	1.037e-12	-1.63809e-13	-1.08774e-12	-1.46826e-13	-1.22349e-12	-2.16304e-11	-8.30938e-12	-6.37121e-12	-8.25481e-12	-1.57632e-11	5.19211e-12	1.319e-11	3.86367e-12	-2.97758e-12	4.86579e-13	-3.38041e-12	-1.19389e-11	3.4536e-12	6.02919e-12	2.62831e-12	-8.03325e-12	-4.85348e-11	1.03892e-10	2.12046e-11	1.81455e-11	-4.05281e-12
8.6329e-06	7.313e-05	9.69821e-05	-0.000110646	-7.80002e-05	0.000150974	-0.000187234	-8.09884e-05	-0.00122323	-0.00173104	-0.00390156	0.464651	-0.065949	-0.171898	-0.00611521	-0.0125077	0.00222943	0.000120776	0.00185094	-0.000109438	-0.000405748	0.00249279	0.000506428	0.000262206	-0.000989326	-0.00570863	-0.000634844	0.00387954	-0.0193823	0.018517	-0.010325	0.00572268	0.00110489	-0.0275314	-0.0923648	0.0279166	-0.000674822	0.015174	0.0251739	0.0217022	-0.0235883	0.0615033	0.0223582	0.0178708	0.00814751	0.00101065	0.00802457	0.0107325	0.000874172	-0.00580256
-1.58365e-30	1.35476e-30	-1.26005e-29	2.32639e-29	-1.65738e-29	-2.01407e-29	-1.15347e-29	-2.4017e-29	-5.23429e-28	9.40394e-28	1.02267e-27	-2.83471e-17	6.41151e-17	3.57673e-16	-4.43879e-17	3.38835e-14	1.77894e-16	-5.33538e-15	-4.68156e-13	5.33057e-15	-4.43546e-13	2.55977e-13	-2.9934e-13	-1.19144e-14	8.10653e-13	-5.30835e-13	-1.37633e-12	2.73237e-13	-4.73427e-12	1.29355e-11	7.90965e-12	2.12059e-12	-1.86157e-12	7.38574e-12	1.26416e-12	9.8879e-12	-5.31809e-12	1.55336e-11	9.20206e-12	-2.14031e-11	7.83306e-12	6.46347e-12	1.43364e-11	-3.56308e-13	-2.29823e-11	-9.25693e-11	7.7519e-11	-2.25079e-11	2.38323e-11	1.94517e-11
2.40603e-09	1.3327e-08	-4.36319e-09	-6.74556e-09	-1.68906e-09	-4.77087e-09	1.05538e-08	-3.4827e-08	-1.27385e-08	4.94661e-07	1.37249e-07	1.10788e-06	-6.58204e-06	-3.72518e-06	2.77118e-06	6.39691e-07	6.38698e-06	-9.28266e-05	8.19563e-05	-2.0201e-05	5.89929e-05	-3.87081e-05	-0.000441318	-0.000201562	0.00172148	0.000337052	-0.000812903	-0.000549313	-0.00129523	0.00212924	-0.00530102	0.00220513	0.00290829	-0.00162193	0.000844152	-0.000424749	-0.000661069	-0.00506872	-0.000949494	-0.00429131	-0.00589901	0.00359503	0.000873095	0.00129651	-0.0586746	0.00710302	-0.00856867	0.00634641	0.0110774	-0.0114388
1.97502e-30	6.16846e-30	3.97134e-30	-2.33127e-29	2.41448e-29	-1.36471e-29	-7.84976e-30	-1.10964e-27	-1.14551e-27	-6.44968e-27	2.46915e-27	3.70339e-22	-1.18016e-21	-9.40931e-21	1.60235e-21	9.95055e-17	3.5873e-19	1.06625e-14	-1.15816e-13	-5.84038e-14	1.77612e-13	-3.17839e-13	-5.19919e-13	-1.58331e-13	4.6182e-13	8.52359e-14	-6.29428e-13	-2.64731e-13	-2.02939e-12	6.32907e-12	6.04093e-12	3.92752e-12	2.72813e-12	8.59332e-12	-4.389e-12	-3.85297e-12	-2.16339e-12	-6.87889e-12	-6.48522e-12	-2.96741e-12	2.45149e-12	-2.64161e-13	-2.80303e-12	4.35766e-13	-3.58326e-12	1.55137e-11	-3.48755e-11	-3.14251e-11	-1.2288e-11	4.99642e-12
1.70825e-30	5.33377e-30	3.38061e-30	-2.03602e-29	2.09145e-29	-1.22027e-29	-7.03413e-30	-9.70906e-28	-9.99585e-28	-5.6363e-27	2.16179e-27	-4.13182e-25	5.79795e-25	1.00261e-23	-1.89391e-24	-6.66368e-19	-3.90042e-21	-3.37516e-13	-8.16902e-13	1.28519e-13	3.43318e-13	-3.24369e-13	-8.39955e-13	-6.30433e-13	1.06761e-12	-2.62718e-12	-4.04156e-12	3.14869e-12	-1.88733e-12	-1.66093e-11	-4.70056e-12	-3.84541e-12	-1.25384e-12	-4.66443e-12	5.12089e-12	9.9935e-12	1.73276e-12	4.09145e-12	9.73512e-12	3.73829e-12	4.41854e-12	5.6899e-12	7.02659e-12	4.43986e-12	1.10145e-11	-2.84553e-11	1.46269e-11	-3.33782e-11	1.36411e-11	-1.16396e-11
-2.58941e-28	-8.1159e-28	-5.10036e-28	3.10065e-27	-3.17143e-27	1.85428e-27	1.0694e-27	1.47468e-25	1.51771e-25	8.55926e-25	-3.27916e-25	1.91616e-23	7.42033e-23	-3.36783e-24	-9.62707e-24	5.94653e-22	1.52261e-22	-8.75889e-15	-2.19427e-14	-3.11507e-14	2.85066e-15	3.53287e-14	-2.0171e-13	2.08693e-13	9.52437e-14	-2.65784e-13	7.65412e-13	1.01319e-12	2.4551e-12	-5.13812e-12	1.12832e-12	-1.56205e-12	-9.84463e-13	-1.30807e-12	4.26404e-12	7.90333e-15	1.18254e-12	7.1411e-13	-5.30195e-13	8.73186e-12	1.05226e-12	-5.29177e-12	1.71473e-13	2.89405e-12	1.63732e-11	1.07544e-11	-7.37587e-13	5.1985e-12	-7.2943e-13	-3.2643e-11
-4.91082e-29	-1.51718e-28	-1.02959e-28	5.61509e-28	-5.98349e-28	3.16289e-28	1.80596e-28	2.68543e-26	2.78986e-26	1.56532e-25	-5.99462e-26	3.48651e-24	1.35143e-23	-6.17216e-25	-1.75264e-24	1.26111e-22	2.79158e-23	1.4473e-14	8.49862e-14	-2.77693e-13	1.16987e-13	2.79278e-13	-6.93092e-13	5.13479e-13	1.58182e-13	4.95802e-13	3.15752e-12	-9.59343e-13	4.732e-12	9.51701e-12	-1.09208e-12	3.25165e-12	1.10545e-12	6.08681e-12	3.17562e-12	-4.71847e-12	-1.2061e-12	-6.82244e-12	-7.02e-12	8.55563e-12	-6.35811e-12	-5.92896e-12	-2.42959e-12	1.18029e-12	-1.8665e-11	6.33919e-11	-3.62581e-11	4.36681e-11	-2.07502e-11	-6.98383e-11
1.68038e-29	5.22665e-29	3.41156e-29	-1.95576e-28	2.04574e-28	-1.12464e-28	-6.45662e-29	-9.31418e-27	-9.6402e-27	-5.41983e-26	2.07408e-26	-1.20967e-24	-4.68706e-24	2.13545e-25	6.07781e-25	-4.36415e-23	-9.67869e-24	2.08502e-15	2.5415e-14	-3.78979e-13	1.88906e-12	-3.77262e-13	6.46917e-13	-8.94089e-13	1.87053e-12	-2.52768e-13	-3.95274e-12	4.12174e-12	-2.7417e-12	-1.59905e-11	9.79585e-12	-4.44458e-12	-2.69385e-12	-1.3414e-11	5.68276e-12	8.73713e-12	5.85923e-13	-2.13013e-11	-2.82259e-12	4.49144e-11	-1.48417e-11	1.2741e-12	-2.10825e-11	-1.4547e-11	5.69535e-11	3.38311e-11	-6.28416e-11	1.10617e-11	5.85195e-11	2.92638e-11
6.77555e-08	1.17983e-07	2.25518e-07	6.51235e-07	5.8694e-07	3.48701e-07	2.19632e-07	-2.4902e-07	-7.38564e-06	6.8731e-06	-4.32378e-08	-0.000310609	-0.000613597	0.000231709	-7.22025e-05	-0.00129872	-4.58616e-05	0.00150113	-0.00299174	0.0167262	-0.00516699	0.0172343	0.0472189	-0.0318261	0.107485	-0.153227	0.491553	0.00551377	-0.121566	0.0427206	-0.0578274	0.00725084	0.0884717	0.00907412	-0.0684548	-0.113196	0.0304726	-0.188049	-0.275819	0.215712	-0.0483206	-0.0176524	-0.0999211	0.0432788	0.0176172	-0.00557542	0.0127627	-0.005244	0.00102565	-0.00938261
-3.10805e-30	-9.64679e-30	-6.39959e-30	3.59242e-29	-3.78502e-29	2.04635e-29	1.1717e-29	1.71305e-27	1.77569e-27	9.97547e-27	-3.81805e-27	2.22446e-25	8.62055e-25	-3.93176e-26	-1.11786e-25	8.02624e-24	1.78031e-24	-6.03435e-18	-5.57568e-17	-3.89468e-15	1.33453e-13	1.05473e-13	-3.03753e-13	-4.98245e-14	-4.22952e-13	-2.65148e-12	-1.80262e-12	-3.13514e-13	1.46293e-12	-1.19678e-11	2.39373e-12	-5.62046e-12	-5.22075e-12	-9.65116e-12	4.01684e-12	1.10601e-11	5.21474e-12	3.78498e-12	4.38669e-12	9.90682e-13	-6.54423e-12	5.07566e-12	6.19988e-12	4.38781e-13	-1.17938e-12	-2.84664e-11	6.91545e-11	2.82195e-11	8.81006e-12	-4.04234e-11
1.70825e-30	5.33377e-30	3.38061e-30	-2.03602e-29	2.09145e-29	-1.22027e-29	-7.03413e-30	-9.70906e-28	-9.99585e-28	-5.6363e-27	2.16179e-27	-1.26155e-25	-4.88554e-25	2.21801e-26	6.34093e-26	-4.54975e-24	-1.00834e-24	1.48768e-18	4.54453e-17	-3.64888e-15	8.55923e-14	7.29651e-14	-3.37959e-13	-2.23998e-13	1.39343e-12	-4.28138e-12	-1.40057e-12	1.64955e-12	3.6345e-12	-1.64476e-11	-2.36497e-12	-5.0396e-12	-2.66555e-12	-1.27051e-11	1.00695e-11	1.46774e-11	1.64969e-12	-7.21701e-14	-9.45402e-14	7.83461e-12	-9.17015e-12	-1.65957e-12	4.10688e-13	-1.945e-12	2.79503e-11	3.86257e-12	2.77393e-11	2.99793e-11	2.36262e-11	-4.49975e-11
7.49497e-29	2.33597e-28	1.50985e-28	-8.84993e-28	9.17572e-28	-5.21838e-28	-3.00236e-28	-4.22213e-26	-4.35711e-26	-2.45358e-25	9.40461e-26	-5.48495e-24	-2.1246e-23	9.65978e-25	2.75673e-24	-1.97842e-22	-4.38587e-23	-1.34014e-18	-4.58853e-17	5.60316e-15	-1.59745e-13	-1.66374e-13	8.5448e-13	5.83133e-13	-2.80364e-12	4.59179e-12	7.34924e-13	-5.89231e-14	-3.8751e-12	7.17843e-12	2.33889e-12	3.90254e-12	1.7222e-12	1.14901e-11	-1.52065e-12	-1.28217e-11	-2.41677e-12	1.45244e-11	1.10315e-11	-1.39333e-11	1.33805e-11	-4.1649e-12	8.33048e-12	1.49651e-12	9.32945e-13	-4.18023e-11	5.37246e-11	-1.04341e-11	3.01453e-11	4.20461e-11
-6.08976e-29	-1.90296e-28	-1.21014e-28	7.23515e-28	-7.44893e-28	4.29285e-28	2.47437e-28	3.44537e-26	3.55142e-26	2.00107e-25	-7.66613e-26	4.47634e-24	1.73369e-23	-7.87644e-25	-2.24929e-24	1.61448e-22	3.57876e-23	1.33233e-19	-1.88415e-18	1.36422e-16	-4.62099e-15	-5.91029e-15	3.55786e-14	2.8222e-14	-1.70891e-13	7.16438e-15	-2.44584e-13	-8.48223e-13	-2.49951e-12	7.53206e-12	8.05144e-13	2.47371e-12	3.34127e-12	4.12694e-12	-8.72526e-12	-4.00064e-12	-4.60171e-13	-1.79628e-12	1.72417e-12	-2.7363e-12	1.58193e-12	5.33855e-12	-5.753e-12	-2.45954e-12	-2.17935e-11	9.82273e-13	-3.42329e-11	-3.05229e-11	-2.1033e-11	-1.66104e-11
7.49497e-29	2.33597e-28	1.50985e-28	-8.84993e-28	9.17572e-28	-5.21838e-28	-3.00236e-28	-4.22213e-26	-4.35711e-26	-2.45358e-25	9.40461e-26	-5.48495e-24	-2.1246e-23	9.65978e-25	2.75673e-24	-1.97842e-22	-4.38587e-23	-1.83493e-19	1.26734e-18	2.62775e-18	-8.1287e-17	-1.44429e-16	1.27497e-15	1.49992e-15	-3.24604e-14	3.52497e-13	2.39895e-13	1.89108e-13	5.69094e-13	4.64215e-12	4.72764e-12	1.96077e-12	-1.2884e-12	3.3835e-12	2.74568e-12	1.54042e-12	-7.6614e-13	4.72813e-12	1.33616e-12	-5.21485e-12	3.84873e-12	6.34408e-13	2.59564e-12	4.68462e-13	-5.11271e-12	-2.37667e-11	3.99168e-11	1.5831e-11	1.60301e-11	2.84346e-11
1.77065e-10	2.44493e-09	-2.16896e-09	2.24532e-09	-2.16429e-09	5.30057e-09	-2.49798e-09	3.06317e-09	7.96533e-08	7.77226e-10	-1.09954e-07	2.47052e-07	7.45101e-07	-2.6995e-07	7.80471e-07	1.75867e-07	1.10176e-05	1.84251e-05	2.15143e-05	-0.000141394	2.05364e-05	-0.000159204	-9.68366e-05	0.000187499	0.000968043	0.000137592	-0.000468764	0.000294124	-8.83576e-05	0.000613609	-0.00192937	0.000382597	-0.000273311	0.00110751	0.000972995	0.000422017	2.55437e-06	-0.000244399	0.000293086	-0.00102452	0.000376678	-0.000758106	0.00059451	0.00284664	-0.00387864	0.00194619	0.00991986	-0.00556678	-0.0152211	0.00239218
0.00385093	-0.317789	-0.0563263	-0.0180228	0.0420598	-0.0795917	0.0259761	0.00553144	-0.0023369	-0.00102286	-0.0432886	-0.000143208	0.00868512	-0.00659624	0.00275097	0.0402005	0.00203469	0.0285604	-0.0314706	-0.000197725	-0.128247	0.0765773	0.00744542	-0.150846	0.0122572	-0.014661	0.0358803	0.0932163	0.0799454	-0.223215	-0.3157	0.265075	-0.734344	-0.180523	0.0262315	0.0155744	-0.0799683	-0.0900954	-0.0762146	0.0477099	0.043093	0.0194197	0.0105065	-0.0423932	-0.00422696	0.00638042	-0.00207572	0.00337744	0.00527342	0.00338456
4.96145e-30	1.53883e-29	9.57814e-30	-5.75661e-29	5.96362e-29	-3.47659e-29	-1.95962e-29	-2.77422e-27	-2.85286e-27	-1.61301e-26	6.14446e-27	-3.60252e-25	-1.39584e-24	6.33143e-26	1.81108e-25	-1.2999e-23	-2.88138e-24	-1.20493e-20	8.37361e-20	5.32043e-20	-5.59845e-20	3.33693e-19	3.56052e-19	3.12538e-19	-7.40289e-18	3.7117e-16	5.31723e-16	1.13365e-13	2.59602e-14	-3.00171e-13	-1.67152e-13	-2.89667e-12	-3.91846e-12	1.86574e-12	4.99672e-12	5.19881e-12	5.91481e-12	-3.90982e-12	-1.43255e-12	-5.89816e-13	-2.85108e-12	-3.42734e-13	1.05861e-11	5.30676e-12	-2.16616e-11	3.87718e-12	3.28607e-11	9.05621e-12	-3.51643e-11	-6.33706e-11
0.0162592	-0.278275	-0.0622251	0.00866294	-0.218629	0.398993	-0.154958	-0.0265173	-0.00464774	0.00193622	-0.0161626	0.00382017	-0.0253601	0.0192809	0.00238136	0.0194536	0.00168978	0.0100285	-0.0170334	0.0139114	-0.0223185	0.0398163	-0.000293411	-0.0708262	-0.0180424	0.070457	0.0710435	0.716925	0.308087	0.176949	0.0927634	0.0253945	0.122152	0.0182291	-0.0112088	0.01441	0.00187204	0.0215063	-0.00595435	-0.0174117	0.00772274	0.0140849	-0.0142318	0.0222959	-0.00666894	0.00117516	-0.00471858	0.00358057	-0.00273939	-0.00199243
3.35565e-30	1.04128e-29	6.4085e-30	-3.89191e-29	4.02e-29	-2.36047e-29	-1.33107e-29	-1.87604e-27	-1.92517e-27	-1.09065e-26	4.1539e-27	-2.43626e-25	-9.4392e-25	4.27944e-26	1.22479e-25	-8.79069e-24	-1.94844e-24	-8.14834e-21	5.66265e-20	3.59763e-20	-3.76106e-20	2.26662e-19	2.24471e-19	1.73446e-19	-4.86697e-19	-4.26852e-18	-2.09377e-18	6.40503e-17	3.08128e-18	2.74571e-19	-7.38007e-19	-6.38685e-17	-6.72296e-17	7.00138e-17	2.23363e-17	2.69646e-16	1.36458e-17	6.55875e-17	1.55657e-16	2.37692e-16	-1.58756e-16	-5.34761e-17	2.2084e-16	-6.24634e-18	-3.28351e-16	3.99251e-16	3.229e-17	2.82e-17	4.33049e-16	-1.24922e-16
-5.55038e-29	-1.72434e-28	-1.06916e-28	6.45091e-28	-6.67005e-28	3.90671e-28	2.20907e-28	3.11004e-26	3.19353e-26	1.80803e-25	-6.88309e-26	4.03853e-24	1.56472e-23	-7.09564e-25	-2.03016e-24	1.45719e-22	3.22995e-23	1.35073e-19	-9.38682e-19	-5.96369e-19	6.23461e-19	-3.75731e-18	-3.72099e-18	-2.87517e-18	8.0679e-18	7.07507e-17	3.46921e-17	-7.5977e-17	-3.66287e-17	-9.17911e-18	2.91097e-17	-1.25833e-16	2.20492e-16	-3.66851e-17	-3.61796e-16	-3.2338e-16	-1.31189e-16	-2.87066e-16	6.21265e-17	-2.74018e-16	-1.06789e-16	-2.49804e-16	-2.69989e-16	8.31213e-17	8.76176e-17	7.49388e-16	1.67945e-16	-1.09772e-15	2.20076e-15	2.51253e-15
-5.07374e-30	-1.57599e-29	-9.77655e-30	5.89815e-29	-6.09873e-29	3.56414e-29	2.01427e-29	2.8401e-27	2.91744e-27	1.65116e-26	-6.29078e-27	3.68813e-25	1.42897e-24	-6.48164e-26	-1.85399e-25	1.33078e-23	2.94981e-24	1.23355e-20	-8.57248e-20	-5.44632e-20	5.69374e-20	-3.43136e-19	-3.39819e-19	-2.62574e-19	7.36798e-19	6.46128e-18	3.16822e-18	3.74955e-18	-3.16221e-18	-1.97497e-18	2.79095e-19	2.57846e-16	-7.57921e-17	-2.19425e-16	-1.41897e-17	-9.82748e-17	-3.21085e-16	-3.81816e-16	2.26494e-16	-1.53823e-16	6.02787e-16	4.38773e-18	5.10544e-16	-2.32077e-16	1.29294e-15	5.87614e-16	-7.42059e-17	2.21984e-15	2.15756e-15	2.84925e-15
3.47085e-29	1.07879e-28	6.69946e-29	-4.03992e-28	4.17772e-28	-2.44721e-28	-1.3852e-28	-1.94746e-26	-1.99901e-26	-1.1321e-25	4.31214e-26	-2.52898e-24	-9.79866e-24	4.44337e-25	1.27139e-24	-9.12544e-23	-2.02269e-23	-8.45861e-20	5.87827e-19	3.73462e-19	-3.90428e-19	2.35293e-18	2.33019e-18	1.80051e-18	-5.05233e-18	-4.43059e-17	-2.17249e-17	7.97869e-18	2.22967e-17	7.64908e-18	-1.62697e-17	-6.04343e-19	3.08685e-17	-1.02592e-17	-5.90614e-17	3.0405e-17	1.00745e-17	-1.49881e-16	3.0332e-16	-1.10525e-16	-1.26603e-16	1.94533e-16	4.74572e-17	2.66517e-16	-4.51788e-17	-1.12081e-15	-1.87266e-15	1.49311e-15	-3.23461e-16	1.08218e-15
-0.000138736	9.4917e-05	-0.000859258	-4.22403e-05	-0.000660544	0.000672665	6.28622e-05	-0.000446982	-0.0289923	-0.000619359	-0.37992	-0.0036046	-0.00121703	-0.000834094	0.0016096	0.00572152	0.000415975	0.00260469	-0.00241286	0.00126286	-0.021404	0.0172315	-0.00178707	-0.0276237	-0.00118147	-0.00343773	-0.0039485	-0.0221795	-0.0194455	0.0504155	0.0394441	0.0677287	0.00361248	0.0270516	0.0196799	-0.0207327	0.0853364	-0.0151096	0.0362662	0.00841108	-0.0300577	-0.0111641	0.00357929	-0.00887512	0.00860689	-0.0291377	-0.0190375	0.000169455	0.0206667	0.0655075
-1.89121e-29	-5.86402e-29	-3.61468e-29	2.18898e-28	-2.26386e-28	1.32158e-28	7.46435e-29	1.05423e-26	1.08284e-26	6.12917e-26	-2.33469e-26	1.36901e-24	5.30415e-24	-2.4062e-25	-6.88188e-25	4.93966e-23	1.09493e-23	4.57874e-20	-3.18197e-19	-2.02159e-19	2.11343e-19	-1.27367e-18	-1.26135e-18	-9.74635e-19	2.73488e-18	2.39833e-17	1.17599e-17	-4.01946e-18	-1.20642e-17	-4.17851e-18	8.73213e-18	-2.78085e-17	1.12764e-16	-2.0318e-17	-6.13164e-17	-2.13454e-16	-6.81502e-17	-6.18822e-18	-1.06363e-16	-2.4415e-16	-5.42025e-16	-1.38591e-16	2.74111e-16	-1.4664e-16	-1.58712e-16	2.89083e-16	7.14916e-16	-3.90766e-18	1.85725e-15	1.9793e-15
-1.6271e-29	-5.04369e-29	-3.12989e-29	1.88867e-28	-1.95415e-28	1.14276e-28	6.4545e-29	9.09944e-27	9.34827e-27	5.29033e-26	-2.01476e-26	1.18163e-24	4.57832e-24	-2.07695e-25	-5.94019e-25	4.26367e-23	9.45092e-24	3.95217e-20	-2.74654e-19	-1.74495e-19	1.82422e-19	-1.09937e-18	-1.08875e-18	-8.41264e-19	2.36063e-18	2.07014e-17	1.01507e-17	-3.46756e-18	-1.04132e-17	-3.6077e-18	7.53058e-18	2.34964e-18	1.1513e-18	3.67716e-20	-1.44885e-16	-1.03101e-17	2.08411e-16	-2.55884e-16	2.05841e-17	-1.77283e-16	-9.05454e-17	7.81523e-18	-1.27537e-16	2.11707e-16	-1.60407e-16	3.79465e-16	4.49882e-16	3.12874e-16	1.75891e-15	3.72631e-16
-2.93156e-29	-9.10167e-29	-5.6626e-29	3.40349e-28	-3.52606e-28	2.05341e-28	1.15912e-28	1.63944e-26	1.68602e-26	9.53285e-26	-3.63264e-26	2.12908e-24	8.24946e-24	-3.74218e-25	-1.07035e-24	7.68243e-23	1.70289e-23	7.12114e-20	-4.9488e-19	-3.14411e-19	3.28693e-19	-1.98088e-18	-1.96174e-18	-1.51581e-18	4.25346e-18	3.73003e-17	1.82898e-17	-6.24782e-18	-1.87629e-17	-6.50053e-18	1.35684e-17	4.4016e-18	2.58323e-18	-1.33969e-18	-3.13181e-16	-2.99027e-17	-2.18471e-16	1.78426e-17	7.89983e-17	5.43284e-17	-3.2472e-16	-1.4994e-16	3.92127e-16	7.75687e-17	1.8254e-16	1.34835e-15	6.89604e-16	-6.59348e-16	3.18081e-16	-9.9356e-16
-6.77555e-08	-1.17983e-07	-2.25518e-07	-6.51235e-07	-5.8694e-07	-3.48701e-07	-2.19632e-07	2.4902e-07	7.38564e-06	-6.8731e-06	4.32378e-08	0.000310609	0.000613597	-0.000231709	7.22025e-05	0.00129872	4.58616e-05	-0.00150113	0.00299174	-0.0167262	0.00516699	-0.0172343	-0.0472189	0.0318261	-0.107485	0.153227	-0.491553	-0.00551377	0.121566	-0.0427206	0.0578274	-0.00725084	-0.0884717	-0.00907412	0.0684548	0.113196	-0.0304726	0.188049	0.275819	-0.215712	0.0483206	0.0176524	0.0999211	-0.0432788	-0.0176172	0.00557542	-0.0127627	0.005244	-0.00102565	0.00938261
2.32662e-29	7.2309e-29	4.49549e-29	-2.71278e-28	2.80377e-28	-1.64285e-28	-9.28265e-29	-1.30656e-26	-1.34252e-26	-7.59572e-26	2.89383e-26	-1.69682e-24	-6.57432e-24	2.98165e-25	8.52986e-25	-6.12255e-23	-1.35709e-23	-5.67522e-20	3.94397e-19	2.50571e-19	-2.61954e-19	1.57867e-18	1.56341e-18	1.20803e-18	-3.38981e-18	-2.97266e-17	-1.45761e-17	4.97923e-18	1.49532e-17	5.18063e-18	-1.08134e-17	-3.05802e-18	-4.19861e-18	2.93832e-18	-1.13357e-17	-1.00109e-16	1.79903e-16	-3.57208e-17	-1.40801e-16	-2.63726e-16	-1.63472e-16	-1.82058e-17	1.0937e-16	2.81155e-17	-2.77133e-18	-1.23178e-15	-1.51449e-15	4.90705e-16	-1.02079e-15	1.89134e-16
1.89981e-28	5.88589e-28	3.61806e-28	-2.19973e-27	2.27293e-27	-1.33234e-27	-7.51614e-28	-1.05979e-25	-1.08867e-25	-6.16142e-25	2.34677e-25	-1.37616e-23	-5.33203e-23	2.41788e-24	6.9184e-24	-4.96567e-22	-1.10064e-22	-4.60283e-19	3.19872e-18	2.03223e-18	-2.12455e-18	1.28037e-17	1.26799e-17	9.79764e-18	-2.74927e-17	-2.41095e-16	-1.18218e-16	4.03836e-17	1.21276e-16	4.2017e-17	-8.7701e-17	-2.4846e-17	-3.38108e-17	2.32055e-17	3.51644e-16	-7.42593e-17	-1.91316e-17	3.28056e-16	1.80987e-16	-4.27009e-16	-1.42164e-16	2.37791e-16	2.0005e-16	6.26938e-16	-2.66984e-16	-7.2874e-15	-6.96423e-15	4.93173e-15	-5.99432e-15	5.59098e-16
-2.37988e-29	-7.38641e-29	-4.57187e-29	2.76477e-28	-2.85885e-28	1.67152e-28	9.45036e-29	1.33159e-26	1.36752e-26	7.74134e-26	-2.94887e-26	1.72927e-24	6.69996e-24	-3.03888e-25	-8.6927e-25	6.23957e-23	1.38306e-23	5.78367e-20	-4.01933e-19	-2.55359e-19	2.66959e-19	-1.60884e-18	-1.59329e-18	-1.23112e-18	3.45459e-18	3.02947e-17	1.48547e-17	-5.07437e-18	-1.52389e-17	-5.27962e-18	1.102e-17	3.12239e-18	4.24632e-18	-2.90944e-18	-4.87847e-17	2.19178e-18	7.20924e-18	-2.15801e-17	-9.389e-17	5.25653e-18	-4.27473e-17	9.07185e-17	-6.93933e-17	-2.78046e-16	3.70364e-17	1.03233e-15	9.84026e-16	-9.97279e-16	4.48506e-16	6.2169e-16
2.64318e-07	8.25456e-07	-1.94401e-07	7.85324e-07	2.24683e-07	1.29875e-06	-1.00157e-06	3.25878e-06	1.66489e-05	-9.14723e-06	6.33527e-06	6.70378e-05	0.000301953	-9.02909e-05	0.000392154	-0.000576641	0.00214851	9.65742e-05	-0.00493392	-0.0268354	0.0103851	-0.0689962	0.0198689	-0.0377635	0.572965	-0.110029	-0.0962089	-0.00349647	0.0589273	-0.0888621	0.334972	0.0463756	0.0902398	-0.674426	0.058377	-0.0570259	0.0754073	-0.10741	0.0625484	-0.00279462	0.118932	0.003202	0.00040733	-0.108115	-0.0122773	-0.00956074	0.00599633	0.00849243	0.00843554	-0.00811744
4.73714e-06	3.41527e-05	-5.6767e-06	1.39611e-05	-8.65592e-06	6.09347e-05	-1.79053e-05	-2.98584e-05	0.000204041	-0.000156592	-5.28183e-05	0.00736563	0.0205417	-0.0146707	0.0267882	0.353827	0.0227779	0.00232418	-0.00926067	-0.0344195	-0.0333986	-0.00185298	-0.0607407	0.119772	-0.0247125	0.0497811	-0.157927	-0.00835131	0.0428225	0.00720829	0.0158436	0.0126003	0.0174626	-0.00822207	-0.0458699	-0.0546144	0.0160344	-0.0898907	-0.134781	0.130599	-0.0373593	-0.00358065	-0.0490067	0.028254	0.00915477	-0.0268837	0.0434762	0.0182194	0.0139474	0.131334
-5.07374e-30	-1.57599e-29	-9.77655e-30	5.89815e-29	-6.09873e-29	3.56414e-29	2.01427e-29	2.8401e-27	2.91744e-27	1.65116e-26	-6.29078e-27	3.68813e-25	1.42897e-24	-6.48164e-26	-1.85399e-25	1.33078e-23	2.94981e-24	1.23355e-20	-8.57248e-20	-5.44632e-20	5.69374e-20	-3.43136e-19	-3.39819e-19	-2.62574e-19	7.36798e-19	6.46128e-18	3.16822e-18	-1.08227e-18	-3.25017e-18	-1.12604e-18	2.35037e-18	6.65937e-19	9.05715e-19	-6.20712e-19	-1.01337e-17	1.50859e-18	-1.69474e-17	4.8403e-17	-1.52238e-16	-8.33438e-17	-1.92672e-16	4.99186e-16	-1.94121e-16	-6.72406e-16	1.14913e-17	-3.15797e-16	1.2112e-17	-3.52553e-16	9.14268e-16	2.37571e-16
0.00016377	9.62948e-05	0.000996025	0.00287817	-0.00193282	0.00122974	-0.00501754	-0.00315297	0.498489	-0.000849168	-0.0380242	9.1574e-05	-0.00142237	-0.00193693	0.00239726	-0.000424812	-0.000748647	-2.98401e-05	1.58085e-05	3.43122e-05	4.1749e-05	-4.19644e-05	1.14028e-05	8.054e-05	-4.89629e-05	-0.000100511	-0.000108665	5.21252e-05	-4.14759e-05	7.98146e-05	-4.83503e-05	-1.34011e-05	0.00017701	0.000243239	0.000486873	-0.000262244	9.35005e-05	-0.000216601	0.000147441	-0.00102676	-0.00060509	0.00118498	0.000134496	0.00100662	-0.000391144	-0.000286371	-0.00131596	-0.00238994	-0.00160369	-0.00105679
2.58668e-30	8.02085e-30	4.95422e-30	-3.00333e-29	3.10492e-29	-1.82258e-29	-1.02702e-29	-1.44862e-27	-1.48841e-27	-8.42222e-27	3.20481e-27	-1.88125e-25	-7.28878e-25	3.30559e-26	9.45667e-26	-6.78797e-24	-1.50459e-24	-6.292e-21	4.37259e-20	2.77802e-20	-2.90422e-20	1.75024e-19	1.73332e-19	1.33932e-19	-3.75821e-19	-3.29573e-18	-1.61602e-18	5.52036e-19	1.65782e-18	5.74365e-19	-1.19886e-18	-3.39677e-19	-4.6198e-19	3.16585e-19	5.28865e-18	-1.99687e-19	-1.83276e-18	4.83583e-18	4.95079e-18	-3.19879e-18	7.90982e-19	9.99295e-19	2.06176e-18	6.30568e-18	-3.81315e-18	-7.56951e-17	3.76249e-17	-1.18565e-16	-2.93069e-16	5.40376e-16
1.58615e-30	-1.41155e-30	1.25737e-29	-2.33874e-29	1.65795e-29	2.01395e-29	1.15234e-29	2.40329e-29	5.24319e-28	-9.40762e-28	-1.02803e-27	1.34452e-26	-3.9012e-27	6.22495e-27	-1.20861e-26	-1.87029e-26	5.09797e-27	1.76011e-26	9.47789e-26	3.97782e-25	2.08518e-25	-7.34504e-25	-3.97378e-25	-3.97927e-26	1.2893e-24	-1.21988e-24	3.93834e-25	2.38563e-24	-7.73301e-25	-2.24973e-24	5.47583e-24	-8.08817e-25	2.83103e-24	-1.72429e-23	-7.14982e-25	-4.29835e-24	6.69517e-24	-1.04858e-23	9.11805e-24	4.6554e-24	2.67558e-23	-1.20953e-22	8.08605e-23	3.98788e-22	-6.55344e-23	2.56593e-17	-5.28662e-17	-3.10013e-17	1.16354e-16	-9.2548e-17
-3.39004e-29	-1.05281e-28	-6.48008e-29	3.93949e-28	-4.06901e-28	2.39765e-28	1.35092e-28	1.90028e-26	1.95053e-26	1.10468e-25	-4.20608e-26	2.46783e-24	9.56126e-24	-4.33433e-25	-1.24059e-24	8.90451e-23	1.97361e-23	8.25377e-20	-5.73592e-19	-3.64418e-19	3.80973e-19	-2.29595e-18	-2.27376e-18	-1.75691e-18	4.92998e-18	4.3233e-17	2.11988e-17	-7.24155e-18	-2.17472e-17	-7.53446e-18	1.57265e-17	4.45584e-18	6.0602e-18	-4.15292e-18	-6.93767e-17	2.61499e-18	2.41499e-17	-6.37721e-17	-6.40564e-17	4.25772e-17	-8.66511e-18	-1.81881e-17	-2.47061e-17	-7.32932e-17	4.98183e-17	1.21567e-15	1.39964e-15	-1.24684e-15	1.14558e-15	3.77109e-16
-4.39252e-29	-1.36517e-28	-8.50875e-29	5.10491e-28	-5.28821e-28	3.09265e-28	1.74214e-28	2.46337e-26	2.53253e-26	1.43237e-25	-5.45321e-26	3.19906e-24	1.2395e-23	-5.62149e-25	-1.60819e-24	1.15431e-22	2.55863e-23	1.06998e-19	-7.43576e-19	-4.72414e-19	4.93874e-19	-2.97635e-18	-2.94758e-18	-2.27757e-18	6.39098e-18	5.60451e-17	2.74811e-17	-9.38759e-18	-2.81919e-17	-9.76729e-18	2.0387e-17	5.77634e-18	7.85615e-18	-5.38364e-18	-8.99365e-17	3.38994e-18	3.13068e-17	-8.2671e-17	-8.30396e-17	5.51949e-17	-1.1233e-17	-2.35782e-17	-3.20278e-17	-9.50136e-17	6.45819e-17	1.6725e-15	1.4689e-15	-1.15364e-15	1.40073e-15	-5.97151e-17
-2.58668e-30	-8.02085e-30	-4.95422e-30	3.00333e-29	-3.10492e-29	1.82258e-29	1.02702e-29	1.44862e-27	1.48841e-27	8.42222e-27	-3.20481e-27	1.88125e-25	7.28878e-25	-3.30559e-26	-9.45667e-26	6.78797e-24	1.50459e-24	6.292e-21	-4.37259e-20	-2.77802e-20	2.90422e-20	-1.75024e-19	-1.73332e-19	-1.33932e-19	3.75821e-19	3.29573e-18	1.61602e-18	-5.52036e-19	-1.65782e-18	-5.74365e-19	1.19886e-18	3.39677e-19	4.6198e-19	-3.16585e-19	-5.28871e-18	1.99345e-19	1.84099e-18	-4.86146e-18	-4.88313e-18	3.24573e-18	-6.60556e-19	-1.38651e-18	-1.88339e-18	-5.58726e-18	3.79773e-18	1.09737e-16	2.0047e-17	1.43774e-16	-1.78311e-16	3.4618e-16
1.2498e-08	4.04008e-08	-5.6847e-08	-1.12727e-07	-1.35115e-08	4.22888e-09	6.71849e-08	-3.00817e-07	3.2972e-07	4.28034e-06	1.69036e-06	1.50728e-05	-1.7586e-05	-5.43326e-05	1.98237e-05	6.71767e-05	3.67221e-05	-0.0015817	0.00181161	-0.00258834	0.00128576	-0.00186086	-0.00448044	-0.00047511	0.0147151	0.00532301	-0.00712915	-0.00415842	-0.0118094	0.0171592	-0.0588264	0.0264692	0.025213	-0.0140666	-0.0164278	-0.0175051	0.0447914	-0.0264361	-0.00597827	-0.0272497	-0.0212958	0.0595345	0.0173205	0.0655049	-0.628625	0.00222468	-0.0230813	-0.179095	-0.206458	0.0616551
-4.80952e-29	-1.49024e-28	-9.20211e-29	5.57056e-28	-5.75937e-28	3.37316e-28	1.90723e-28	2.68546e-26	2.75727e-26	1.56127e-25	-5.94551e-26	3.4874e-24	1.35116e-23	-6.12826e-25	-1.75305e-24	1.25831e-22	2.78914e-23	1.16637e-19	-8.10565e-19	-5.14974e-19	5.38368e-19	-3.24449e-18	-3.21313e-18	-2.48275e-18	6.96675e-18	6.10942e-17	2.99569e-17	-1.02333e-17	-3.07317e-17	-1.06472e-17	2.22237e-17	6.29673e-18	8.56391e-18	-5.86866e-18	-9.80389e-17	3.69534e-18	3.41272e-17	-9.01188e-17	-9.05206e-17	6.01674e-17	-1.2245e-17	-2.57023e-17	-3.49132e-17	-1.03573e-16	7.04001e-17	1.82568e-15	1.58572e-15	-1.20302e-15	1.45285e-15	5.54243e-17
-2.7398e-28	-8.51239e-28	-5.27826e-28	3.18436e-27	-3.29448e-27	1.92978e-27	1.09218e-27	1.53567e-25	1.57531e-25	8.92887e-25	-3.40049e-25	1.99441e-23	7.72729e-23	-3.50507e-24	-1.00255e-23	7.19626e-22	1.59513e-22	6.67049e-19	-4.63563e-18	-2.94514e-18	3.07893e-18	-1.85553e-17	-1.83759e-17	-1.41989e-17	3.98429e-17	3.49398e-16	1.71324e-16	-5.85244e-17	-1.75755e-16	-6.08916e-17	1.27098e-16	3.6011e-17	4.89771e-17	-3.35629e-17	-5.60685e-16	2.11337e-17	1.95174e-16	-5.1539e-16	-5.17688e-16	3.44098e-16	-7.00292e-17	-1.46992e-16	-1.99669e-16	-5.92337e-16	4.02619e-16	1.04411e-14	9.06875e-15	-6.88009e-15	8.30895e-15	3.16192e-16
-1.00015e-29	-3.10459e-29	-1.92264e-29	1.16107e-28	-1.20127e-28	7.04555e-29	3.97345e-29	5.60388e-27	5.75804e-27	3.25811e-26	-1.24021e-26	7.2773e-25	2.81955e-24	-1.27849e-25	-3.6585e-25	2.62581e-23	5.82017e-24	2.43396e-20	-1.69147e-19	-1.07464e-19	1.12345e-19	-6.77054e-19	-6.70509e-19	-5.18095e-19	1.4538e-18	1.2749e-17	6.25133e-18	-2.13547e-18	-6.41303e-18	-2.22184e-18	4.63759e-18	1.31399e-18	1.7871e-18	-1.22466e-18	-2.04585e-17	7.71135e-19	7.12159e-18	-1.88058e-17	-1.88896e-17	1.25556e-17	-2.55526e-18	-5.3635e-18	-7.2856e-18	-2.16134e-17	1.46909e-17	3.80979e-16	3.30904e-16	-2.51044e-16	3.03181e-16	1.15367e-17
4.58046e-29	1.87978e-28	-1.78116e-28	4.16352e-29	4.29542e-28	-5.75591e-28	-1.2937e-28	-4.83098e-29	-5.75614e-27	4.28948e-27	-2.60186e-26	2.14375e-26	1.12155e-25	1.76877e-26	-5.14956e-26	-5.24868e-25	-2.0807e-25	3.08082e-24	-2.79856e-24	-3.02804e-24	-6.46581e-24	-1.58908e-24	4.52472e-24	-1.94504e-24	1.2499e-23	-1.1958e-23	4.021e-23	7.84653e-24	-3.24362e-23	5.93295e-24	-2.68411e-23	3.99481e-24	3.52889e-23	2.47625e-23	2.01702e-23	-1.40371e-23	2.9562e-23	-1.59464e-22	-1.32083e-22	1.26784e-22	1.29493e-23	-1.17899e-22	-4.19862e-23	4.77663e-23	5.58311e-22	-2.66748e-22	6.26308e-22	2.27725e-22	1.81293e-21	-3.94149e-22
-1.94658e-29	-4.51897e-29	3.14374e-29	6.3521e-30	-1.07065e-28	2.52945e-29	2.41963e-29	-7.38965e-29	1.45913e-27	1.5816e-27	1.09443e-27	2.2115e-26	1.07166e-26	1.91868e-27	8.12912e-28	1.18567e-25	-1.8554e-25	-1.011e-24	-7.51295e-25	-4.72465e-25	1.77805e-25	-4.16522e-26	-2.33681e-24	3.3446e-24	4.1681e-24	-2.54449e-24	-1.41877e-25	2.6627e-25	-6.54592e-24	9.10819e-24	1.61624e-23	2.68956e-24	1.43023e-23	-1.5182e-24	7.01645e-24	-5.63215e-24	-2.50129e-24	-2.13953e-23	1.61538e-23	-1.08655e-23	1.41403e-23	1.34754e-23	-1.60344e-23	-2.52419e-23	-3.458e-23	-8.89387e-23	1.13184e-22	2.29525e-22	-1.94446e-23	-3.17956e-22
-1.35957e-29	-4.22093e-29	-2.61679e-29	1.57877e-28	-1.63356e-28	9.53011e-29	5.37714e-29	7.60105e-27	7.8232e-27	4.41935e-26	-1.68424e-26	9.87117e-25	3.82459e-24	-1.73512e-25	-4.96241e-25	3.56175e-23	7.895e-24	3.30151e-20	-2.29437e-19	-1.45767e-19	1.52389e-19	-9.1838e-19	-9.09502e-19	-7.02763e-19	1.97199e-18	1.72932e-17	8.47953e-18	-2.89662e-18	-8.69886e-18	-3.01378e-18	6.2906e-18	1.78234e-18	2.42408e-18	-1.66117e-18	-2.77507e-17	1.04599e-18	9.65997e-18	-2.55088e-17	-2.56226e-17	1.70309e-17	-3.46604e-18	-7.27525e-18	-9.88245e-18	-2.93173e-17	1.99273e-17	5.16774e-16	4.4885e-16	-3.40525e-16	4.11245e-16	1.56499e-17
-3.06984e-30	-9.52271e-30	-5.83427e-30	3.55349e-29	-3.66905e-29	2.15459e-29	1.21732e-29	1.7129e-27	1.75808e-27	9.95851e-27	-3.79214e-27	2.2247e-25	8.61915e-25	-3.90868e-26	-1.11836e-25	8.02693e-24	1.77919e-24	7.44044e-21	-5.1707e-20	-3.28508e-20	3.43432e-20	-2.06971e-19	-2.0497e-19	-1.58378e-19	4.44418e-19	3.89728e-18	1.91099e-18	-6.52797e-19	-1.96042e-18	-6.79201e-19	1.41768e-18	4.01676e-19	5.46303e-19	-3.74369e-19	-6.25403e-18	2.3573e-19	2.17702e-18	-5.7488e-18	-5.77443e-18	3.83816e-18	-7.81125e-19	-1.63959e-18	-2.22716e-18	-6.60708e-18	4.49092e-18	1.16463e-16	1.01155e-16	-7.67423e-17	9.26802e-17	3.52693e-18
1.57974e-34	-3.27478e-34	-7.09332e-34	-3.39573e-34	-5.50015e-34	-1.25027e-33	-6.87586e-34	7.58461e-34	-2.68443e-32	-3.34119e-32	-1.68474e-32	5.37237e-31	1.01784e-31	-8.78056e-31	1.94895e-31	-1.81508e-31	7.94517e-31	-6.15689e-30	6.30682e-30	8.35232e-30	7.30744e-30	1.45652e-29	3.96467e-30	1.92413e-29	-2.82253e-29	-7.15869e-31	7.74933e-29	4.52736e-29	-6.81533e-29	-8.42886e-29	4.00318e-29	4.95972e-29	4.81978e-29	2.4387e-28	1.3028e-28	1.65017e-28	-2.45632e-28	-7.23531e-28	1.48561e-29	-1.86518e-28	-6.79874e-28	-7.62865e-28	1.16466e-28	-4.89638e-29	5.86133e-28	-1.26205e-27	1.01657e-27	-3.08189e-27	1.52931e-27	-1.78611e-27
-7.89392e-28	-2.45119e-27	-1.50317e-27	9.13376e-27	-9.4331e-27	5.52926e-27	3.12898e-27	4.40277e-25	4.51666e-25	2.55997e-24	-9.74753e-25	5.71798e-23	2.21545e-22	-1.0046e-23	-2.87445e-23	2.06322e-21	4.57322e-22	1.91247e-18	-1.32906e-17	-8.44387e-18	8.82745e-18	-5.3199e-17	-5.26848e-17	-4.0709e-17	1.14232e-16	1.00174e-15	4.91194e-16	-1.67793e-16	-5.03899e-16	-1.74579e-16	3.64396e-16	1.03245e-16	1.4042e-16	-9.62266e-17	-1.60751e-15	6.05913e-17	5.59573e-16	-1.47765e-15	-1.48424e-15	9.86547e-16	-2.00777e-16	-4.21433e-16	-5.72461e-16	-1.69826e-15	1.15433e-15	2.99352e-14	2.60006e-14	-1.97256e-14	2.38222e-14	9.0655e-16
-2.26826e-29	-7.03871e-29	-4.37871e-29	2.6373e-28	-2.72798e-28	1.59943e-28	9.05025e-29	1.27198e-26	1.30537e-26	7.3943e-26	-2.81606e-26	1.65178e-24	6.39983e-24	-2.90227e-25	-8.30375e-25	5.96008e-23	1.32107e-23	5.52461e-20	-3.8393e-19	-2.43921e-19	2.55002e-19	-1.53678e-18	-1.52192e-18	-1.17597e-18	3.29985e-18	2.89377e-17	1.41893e-17	-4.84708e-18	-1.45563e-17	-5.04314e-18	1.05264e-17	2.98249e-18	4.05635e-18	-2.77973e-18	-4.64368e-17	1.75032e-18	1.61646e-17	-4.26854e-17	-4.28757e-17	2.84987e-17	-5.79993e-18	-1.21741e-17	-1.65369e-17	-4.90582e-17	3.33455e-17	8.64748e-16	7.51087e-16	-5.69819e-16	6.8816e-16	2.61878e-17
-2.81563e-26	-8.73384e-26	-5.40517e-26	3.26252e-25	-3.37709e-25	1.97186e-25	1.11242e-25	1.5724e-23	1.61456e-23	9.14251e-23	-3.482e-23	2.04185e-21	7.91131e-21	-3.58805e-22	-1.02641e-21	7.36768e-20	1.6331e-20	6.82935e-17	-4.74603e-16	-3.01528e-16	3.15225e-16	-1.89972e-15	-1.88136e-15	-1.4537e-15	4.07918e-15	3.57719e-14	1.75404e-14	-5.99182e-15	-1.79941e-14	-6.23417e-15	1.30124e-14	3.68686e-15	5.01434e-15	-3.43622e-15	-5.74038e-14	2.1637e-15	1.99822e-14	-5.27664e-14	-5.30017e-14	3.52293e-14	-7.1697e-15	-1.50492e-14	-2.04424e-14	-6.06443e-14	4.12207e-14	1.06898e-12	9.28472e-13	-7.04394e-13	8.50682e-13	3.23726e-14
0.00368792	-0.000207245	0.00296973	-0.0122689	0.01425	-0.00618409	0.00199451	-0.228463	-0.00125852	0.000172697	0.000187385	-0.000691902	-0.000620154	3.66312e-05	-0.000564111	-0.000618987	-0.00478239	-0.0867189	0.475745	-0.207064	-0.0636996	0.239647	0.289343	0.0850354	-0.00314232	-0.113689	-0.0529949	0.0119314	0.0328698	0.00762082	-0.025049	-0.00412896	0.0107286	-0.000450226	0.00872386	0.0014722	0.00156888	0.00109236	-0.00508928	-0.000155615	0.0115764	-0.0123677	0.00141184	-0.00280554	-0.000887828	0.000173779	-0.000661602	0.000782196	-0.000229471	0.000689224
3.20534e-08	3.19879e-09	2.04958e-09	1.41128e-07	-1.49106e-07	-1.16666e-07	1.47872e-07	-1.09007e-07	1.43001e-06	5.47651e-06	3.86433e-06	-4.17985e-05	5.86556e-06	-1.92106e-05	2.67442e-05	-0.000171815	3.23897e-05	-0.000277614	-0.000210133	-0.000705086	0.00270206	-0.00359525	0.00507116	4.55677e-05	0.00128269	-0.00628096	-0.0100574	-0.00705233	0.0181227	-0.0651173	0.0998689	-0.0199544	-0.0552814	0.0926063	-0.315497	0.095762	0.251241	-0.145869	-0.227156	-0.397971	0.20383	-0.0260833	-0.0616922	-0.0740049	0.0135276	0.55681	0.310116	-0.247186	0.211591	0.0275185
-2.09057e-28	-6.48199e-28	-4.02044e-28	2.42171e-27	-2.50852e-27	1.4638e-27	8.2698e-28	1.16734e-25	1.19844e-25	6.78748e-25	-2.58619e-25	1.51594e-23	5.8737e-23	-2.66474e-24	-7.62084e-24	5.46998e-22	1.21247e-22	5.07035e-19	-3.52361e-18	-2.23865e-18	2.34034e-18	-1.41042e-17	-1.39678e-17	-1.07928e-17	3.02852e-17	2.65583e-16	1.30226e-16	-4.44853e-17	-1.33594e-16	-4.62847e-17	9.66089e-17	2.73725e-17	3.72282e-17	-2.55117e-17	-4.26186e-16	1.6064e-17	1.48355e-16	-3.91756e-16	-3.93503e-16	2.61554e-16	-5.32303e-17	-1.11731e-16	-1.51771e-16	-4.50245e-16	3.06037e-16	7.93644e-15	6.89329e-15	-5.22966e-15	6.31576e-15	2.40345e-16
-1.5756e-30	1.34212e-30	-1.26366e-29	2.32773e-29	-1.66435e-29	-2.01526e-29	-1.14911e-29	-2.40685e-29	-5.24429e-28	9.42149e-28	1.02149e-27	-1.34244e-26	3.90819e-27	-6.20376e-27	1.20978e-26	1.88286e-26	-5.12228e-27	-1.49815e-26	-9.52449e-26	-3.9782e-25	-2.11278e-25	7.37597e-25	3.95521e-25	3.85497e-26	-1.28346e-24	1.22012e-24	-3.96989e-25	-2.39254e-24	7.66201e-25	2.25353e-24	-5.46932e-24	7.98479e-25	-2.80501e-24	1.72617e-23	7.08201e-25	4.25352e-24	-5.70481e-24	6.96476e-24	1.24053e-24	3.67747e-24	8.2412e-24	-5.01955e-24	-2.04117e-24	2.0792e-24	5.539e-24	1.55602e-23	5.96651e-23	9.96418e-23	-5.38885e-23	5.08892e-23
-5.34735e-29	-1.65984e-28	-1.03132e-28	6.20934e-28	-6.42637e-28	3.76349e-28	2.12443e-28	2.99624e-26	3.07551e-26	1.74214e-25	-6.63201e-26	3.89098e-24	1.50747e-23	-6.83644e-25	-1.95587e-24	1.4039e-22	3.11184e-23	1.30132e-19	-9.0435e-19	-5.74557e-19	6.00658e-19	-3.61989e-18	-3.5849e-18	-2.77001e-18	7.77282e-18	6.8163e-17	3.3423e-17	-1.14173e-17	-3.42875e-17	-1.18791e-17	2.47951e-17	7.02527e-18	9.55477e-18	-6.54768e-18	-1.09382e-16	4.1229e-18	3.80758e-17	-1.00546e-16	-1.00994e-16	6.7129e-17	-1.36618e-17	-2.86762e-17	-3.89527e-17	-1.15557e-16	7.85456e-17	2.03692e-15	1.76919e-15	-1.34221e-15	1.62096e-15	6.16856e-17
-2.74878e-28	-8.53766e-28	-5.33128e-28	3.20375e-27	-3.3156e-27	1.93906e-27	1.0947e-27	1.54352e-25	1.58588e-25	8.97381e-25	-3.42041e-25	2.00444e-23	7.76642e-23	-3.52223e-24	-1.00769e-23	7.23272e-22	1.60317e-22	6.70423e-19	-4.65908e-18	-2.96003e-18	3.0945e-18	-1.86491e-17	-1.84689e-17	-1.42707e-17	4.00444e-17	3.51166e-16	1.7219e-16	-5.88204e-17	-1.76644e-16	-6.11996e-17	1.2774e-16	3.61932e-17	4.92248e-17	-3.37327e-17	-5.63521e-16	2.12406e-17	1.96161e-16	-5.17997e-16	-5.20306e-16	3.45839e-16	-7.03834e-17	-1.47735e-16	-2.00679e-16	-5.95333e-16	4.04655e-16	1.04939e-14	9.11461e-15	-6.91489e-15	8.35097e-15	3.17795e-16
5.34735e-29	1.65984e-28	1.03132e-28	-6.20934e-28	6.42637e-28	-3.76349e-28	-2.12443e-28	-2.99624e-26	-3.07551e-26	-1.74214e-25	6.63201e-26	-3.89098e-24	-1.50747e-23	6.83644e-25	1.95587e-24	-1.4039e-22	-3.11184e-23	-1.30132e-19	9.0435e-19	5.74557e-19	-6.00658e-19	3.61989e-18	3.5849e-18	2.77001e-18	-7.77282e-18	-6.8163e-17	-3.3423e-17	1.14173e-17	3.42875e-17	1.18791e-17	-2.47951e-17	-7.02527e-18	-9.55477e-18	6.54768e-18	1.09382e-16	-4.1229e-18	-3.80758e-17	1.00546e-16	1.00994e-16	-6.7129e-17	1.36618e-17	2.86762e-17	3.89527e-17	1.15557e-16	-7.85456e-17	-2.03692e-15	-1.76919e-15	1.34221e-15	-1.62096e-15	-6.16856e-17
-1.36215e-29	-4.22662e-29	-2.61e-29	1.57923e-28	-1.63325e-28	9.52904e-29	5.37664e-29	7.60104e-27	7.82257e-27	4.41949e-26	-1.68425e-26	9.87122e-25	3.82459e-24	-1.73512e-25	-4.96235e-25	3.56176e-23	7.89496e-24	3.30151e-20	-2.29437e-19	-1.45767e-19	1.52389e-19	-9.1838e-19	-9.09502e-19	-7.02763e-19	1.97199e-18	1.72932e-17	8.47953e-18	-2.89662e-18	-8.69886e-18	-3.01378e-18	6.2906e-18	1.78234e-18	2.42408e-18	-1.66117e-18	-2.77507e-17	1.04599e-18	9.65997e-18	-2.55088e-17	-2.56226e-17	1.70309e-17	-3.46604e-18	-7.27525e-18	-9.88245e-18	-2.93173e-17	1.99273e-17	5.16774e-16	4.4885e-16	-3.40525e-16	4.11245e-16	1.56499e-17
-7.11463e-29	-2.20761e-28	-1.36485e-28	8.25596e-28	-8.54065e-28	5.00986e-28	2.82249e-28	3.9837e-26	4.09127e-26	2.3163e-25	-8.81632e-26	5.17319e-24	2.00439e-23	-9.08982e-25	-2.60056e-24	1.86667e-22	4.13756e-23	1.73028e-19	-1.20245e-18	-7.63948e-19	7.98653e-19	-4.81311e-18	-4.76659e-18	-3.68309e-18	1.0335e-17	9.06315e-17	4.44402e-17	-1.51808e-17	-4.55897e-17	-1.57949e-17	3.29682e-17	9.34101e-18	1.27043e-17	-8.70598e-18	-1.45438e-16	5.48193e-18	5.06267e-17	-1.33689e-16	-1.34285e-16	8.92567e-17	-1.81651e-17	-3.81287e-17	-5.17927e-17	-1.53648e-16	1.04437e-16	2.70835e-15	2.35237e-15	-1.78465e-15	2.15528e-15	8.2019e-17
-4.96145e-30	-1.53883e-29	-9.57814e-30	5.75661e-29	-5.96362e-29	3.47659e-29	1.95962e-29	2.77422e-27	2.85286e-27	1.61301e-26	-6.14446e-27	3.60252e-25	1.39584e-24	-6.33143e-26	-1.81108e-25	1.2999e-23	2.88138e-24	1.20493e-20	-8.37361e-20	-5.31998e-20	5.56165e-20	-3.35175e-19	-3.31935e-19	-2.56483e-19	7.19705e-19	6.31139e-18	3.09472e-18	-1.05716e-18	-3.17477e-18	-1.09992e-18	2.29584e-18	6.50488e-19	8.84701e-19	-6.06266e-19	-1.0128e-17	3.8175e-19	3.52554e-18	-9.3098e-18	-9.3513e-18	6.21565e-18	-1.26498e-18	-2.6552e-18	-3.60673e-18	-1.06997e-17	7.27274e-18	1.88604e-16	1.63814e-16	-1.24279e-16	1.50089e-16	5.71163e-18
-2.93156e-29	-9.10167e-29	-5.6626e-29	3.40349e-28	-3.52606e-28	2.05341e-28	1.15912e-28	1.63944e-26	1.68602e-26	9.53285e-26	-3.63264e-26	2.12908e-24	8.24946e-24	-3.74218e-25	-1.07035e-24	7.68243e-23	1.70289e-23	7.12114e-20	-4.9488e-19	-3.14411e-19	3.28693e-19	-1.98088e-18	-1.96174e-18	-1.51581e-18	4.25346e-18	3.73003e-17	1.82898e-17	-6.24782e-18	-1.87629e-17	-6.50053e-18	1.35684e-17	3.84439e-18	5.22858e-18	-3.58303e-18	-5.98564e-17	2.25614e-18	2.08359e-17	-5.50209e-17	-5.52662e-17	3.67345e-17	-7.47603e-18	-1.56922e-17	-2.13158e-17	-6.32354e-17	4.29819e-17	1.11465e-15	9.68141e-16	-7.34489e-16	8.87028e-16	3.37557e-17
4.05168e-30	1.25547e-29	7.72148e-30	-4.68275e-29	4.84519e-29	-2.83291e-29	-1.5984e-29	-2.25741e-27	-2.3198e-27	-1.31262e-26	4.99806e-27	-2.93168e-25	-1.13585e-24	5.15216e-26	1.47371e-25	-1.0578e-23	-2.3447e-24	-9.80512e-21	6.81402e-20	4.32913e-20	-4.52579e-20	2.72749e-19	2.70112e-19	2.08713e-19	-5.8566e-19	-5.13589e-18	-2.51833e-18	8.60265e-19	2.58347e-18	8.9506e-19	-1.86824e-18	-5.29335e-19	-7.19926e-19	4.93349e-19	8.24165e-18	-3.10649e-19	-2.86891e-18	7.57585e-18	7.60962e-18	-5.05798e-18	1.02938e-18	2.16067e-18	2.93498e-18	8.7069e-18	-5.91819e-18	-1.53476e-16	-1.33304e-16	1.01132e-16	-1.22135e-16	-4.64784e-18
-7.5568e-29	-2.34546e-28	-1.44328e-28	8.7477e-28	-9.04536e-28	5.30921e-28	2.9924e-28	4.22231e-26	4.33644e-26	2.45508e-25	-9.3427e-26	5.48313e-24	2.12442e-23	-9.63309e-25	-2.75641e-24	1.97847e-22	4.38534e-23	1.8339e-19	-1.27446e-18	-8.097e-19	8.46483e-19	-5.10136e-18	-5.05205e-18	-3.90367e-18	1.09539e-17	9.60593e-17	4.71016e-17	-1.609e-17	-4.832e-17	-1.67408e-17	3.49427e-17	9.90043e-18	1.34652e-17	-9.22737e-18	-1.54148e-16	5.81023e-18	5.36587e-17	-1.41695e-16	-1.42327e-16	9.46021e-17	-1.9253e-17	-4.04121e-17	-5.48945e-17	-1.6285e-16	1.10691e-16	2.87055e-15	2.49325e-15	-1.89153e-15	2.28436e-15	8.6931e-17
7.89392e-28	2.45119e-27	1.50317e-27	-9.13376e-27	9.4331e-27	-5.52926e-27	-3.12898e-27	-4.40277e-25	-4.51666e-25	-2.55997e-24	9.74753e-25	-5.71798e-23	-2.21545e-22	1.0046e-23	2.87445e-23	-2.06322e-21	-4.57322e-22	-1.91247e-18	1.32906e-17	8.44387e-18	-8.82745e-18	5.3199e-17	5.26848e-17	4.0709e-17	-1.14232e-16	-1.00174e-15	-4.91194e-16	1.67793e-16	5.03899e-16	1.74579e-16	-3.64396e-16	-1.03245e-16	-1.4042e-16	9.62266e-17	1.60751e-15	-6.05913e-17	-5.59573e-16	1.47765e-15	1.48424e-15	-9.86547e-16	2.00777e-16	4.21433e-16	5.72461e-16	1.69826e-15	-1.15433e-15	-2.99352e-14	-2.60006e-14	1.97256e-14	-2.38222e-14	-9.0655e-16
4.78436e-06	3.41262e-05	-5.4894e-06	1.44211e-05	-8.45099e-06	6.13014e-05	-1.73189e-05	-2.99572e-05	0.000199262	-0.000156881	-6.03507e-05	0.00719147	0.0204726	-0.014545	0.0267898	0.353573	0.0230926	0.00311699	-0.00967417	-0.024795	-0.0333215	0.00540238	-0.0313981	0.0991896	0.030499	-0.0456044	0.143193	0.00352654	-0.0400284	-0.010423	-0.00589047	-0.0129414	-0.000701885	0.00190427	0.054397	0.0352045	-0.0182788	0.0625875	0.101334	-0.0867448	0.0109544	-0.00875271	0.0317923	-0.0390277	-0.0324641	0.533162	-0.464976	0.321949	-0.244095	-0.357191
2.48347e-31	7.70641e-31	4.74257e-31	-2.88038e-30	2.97609e-30	-1.74194e-30	-9.85969e-31	-1.38708e-28	-1.4252e-28	-8.06359e-28	3.07204e-28	-1.80137e-26	-6.97916e-26	3.16585e-27	9.05516e-27	-6.49952e-25	-1.44066e-25	-6.02465e-22	4.1868e-21	2.65999e-21	-2.78082e-21	1.67588e-20	1.65968e-20	1.28241e-20	-3.59853e-20	-3.15569e-19	-1.54736e-19	5.28581e-20	1.58738e-19	5.4996e-20	-1.14792e-19	-3.25244e-20	-4.42351e-20	3.03133e-20	5.06399e-19	-1.90875e-20	-1.76277e-19	4.6549e-19	4.67565e-19	-3.10782e-19	6.32489e-20	1.3276e-19	1.80337e-19	5.34986e-19	-3.63637e-19	-9.43018e-18	-8.1907e-18	6.21395e-18	-7.50447e-18	-2.85582e-19
-0.00624834	-0.0333448	0.0266189	0.510027	0.337947	-0.0510382	-0.185797	-0.00595634	-0.00376491	0.000716449	-0.00394486	0.0399101	-0.289241	0.216435	0.0116453	0.0270373	0.0107412	0.00280094	-0.00611692	0.00156423	-0.0116166	0.00678584	-0.00410234	-0.0172413	-0.000362472	0.0137278	0.000691599	0.0417047	0.0247824	0.0255815	-0.00431206	-0.0923631	0.00404153	0.0183573	0.0960224	-0.153683	0.113558	0.0647653	-0.169866	0.0575189	0.255729	0.135268	0.504247	0.139274	0.0336472	0.00935489	-0.00696691	0.00684174	-0.00114275	0.00371421
3.06984e-30	9.52271e-30	5.83427e-30	-3.55349e-29	3.66905e-29	-2.15459e-29	-1.21732e-29	-1.7129e-27	-1.75808e-27	-9.95851e-27	3.79214e-27	-2.2247e-25	-8.61915e-25	3.90868e-26	1.11836e-25	-8.02693e-24	-1.77919e-24	-7.44044e-21	5.1707e-20	3.28508e-20	-3.43432e-20	2.06971e-19	2.0497e-19	1.58378e-19	-4.44418e-19	-3.89728e-18	-1.91099e-18	6.52797e-19	1.96042e-18	6.79201e-19	-1.41768e-18	-4.01676e-19	-5.46303e-19	3.74369e-19	6.25403e-18	-2.3573e-19	-2.17702e-18	5.7488e-18	5.77443e-18	-3.83816e-18	7.81125e-19	1.63959e-18	2.22716e-18	6.60708e-18	-4.49092e-18	-1.16463e-16	-1.01155e-16	7.67423e-17	-9.26802e-17	-3.52693e-18
-3.34905e-30	-1.03987e-29	-6.42527e-30	3.89074e-29	-4.0205e-29	2.361e-29	1.3311e-29	1.87604e-27	1.92517e-27	1.09066e-26	-4.15384e-27	2.43628e-25	9.4392e-25	-4.27922e-26	-1.22477e-25	8.79067e-24	1.94843e-24	8.14834e-21	-5.66265e-20	-3.59763e-20	3.76106e-20	-2.26662e-19	-2.24471e-19	-1.73447e-19	4.86701e-19	4.26808e-18	2.0928e-18	-7.14905e-19	-2.14694e-18	-7.43821e-19	1.55256e-18	4.39893e-19	5.98279e-19	-4.09988e-19	-6.84905e-18	2.58158e-19	2.38414e-18	-6.29575e-18	-6.32382e-18	4.20333e-18	-8.55442e-19	-1.79558e-18	-2.43905e-18	-7.23569e-18	4.91819e-18	1.27543e-16	1.10779e-16	-8.40437e-17	1.01498e-16	3.86249e-18
0.00737778	-0.000413062	0.00593906	-0.0245383	0.0285051	-0.012371	0.00398523	-0.457004	-0.00252452	0.000385139	0.000675565	0.000177271	-0.000174278	-2.00119e-05	0.00017891	0.000361556	0.00143381	0.0095793	-0.0962278	0.0287479	-0.00189737	-0.0618002	-0.0815284	-0.0213175	0.139503	0.208557	-0.0325502	0.00394405	-0.0817567	0.15157	-0.353192	0.0739445	0.139059	-0.0597781	0.0207162	-0.00407712	0.0262572	-0.0447913	-0.0133169	-0.104424	0.0456124	-0.0335624	-0.00368545	-0.0404999	0.0467618	-0.0038804	-0.00233385	0.00795421	0.0124556	-0.00513063
-2.08802e-29	-6.47991e-29	-4.00272e-29	2.42528e-28	-2.50608e-28	1.4753e-28	8.31578e-29	1.17068e-26	1.20168e-26	6.80608e-26	-2.59065e-26	1.52031e-24	5.89032e-24	-2.67036e-25	-7.64276e-25	5.48565e-23	1.21587e-23	5.08481e-20	-3.53366e-19	-2.24503e-19	2.34702e-19	-1.41444e-18	-1.40077e-18	-1.08236e-18	3.03716e-18	2.66341e-17	1.30597e-17	-4.46122e-18	-1.33975e-17	-4.64166e-18	9.68844e-18	2.74506e-18	3.73344e-18	-2.55844e-18	-4.27401e-17	1.61098e-18	1.48778e-17	-3.92873e-17	-3.94625e-17	2.623e-17	-5.33821e-18	-1.12049e-17	-1.52204e-17	-4.51528e-17	3.0691e-17	7.95907e-16	6.91295e-16	-5.24458e-16	6.33377e-16	2.41031e-17
-5.07374e-30	-1.57599e-29	-9.77655e-30	5.89815e-29	-6.09873e-29	3.56414e-29	2.01427e-29	2.8401e-27	2.91744e-27	1.65116e-26	-6.29078e-27	3.68813e-25	1.42897e-24	-6.48164e-26	-1.85399e-25	1.33078e-23	2.94981e-24	1.23355e-20	-8.57248e-20	-5.44632e-20	5.69374e-20	-3.43136e-19	-3.39819e-19	-2.62574e-19	7.36798e-19	6.46128e-18	3.16822e-18	-1.08227e-18	-3.25017e-18	-1.12604e-18	2.35037e-18	6.65937e-19	9.05713e-19	-6.20665e-19	-1.03685e-17	3.90816e-19	3.60927e-18	-9.5309e-18	-9.5734e-18	6.36327e-18	-1.29502e-18	-2.71826e-18	-3.69239e-18	-1.09538e-17	7.44547e-18	1.93083e-16	1.67705e-16	-1.27231e-16	1.53654e-16	5.84728e-18
4.76282e-06	3.40944e-05	-5.50819e-06	1.43739e-05	-8.44488e-06	6.12533e-05	-1.74367e-05	-2.99298e-05	0.000199342	-0.000155932	-5.98008e-05	0.00718588	0.0204234	-0.0145204	0.0267543	0.353121	0.0231093	0.00360933	-0.00872974	-0.0246694	-0.0340593	0.00336629	-0.0314842	0.0999168	0.0296157	-0.0455996	0.133826	0.00931805	-0.0354343	-0.00675106	-0.00403637	-0.00797188	-0.00684678	0.00549561	0.0346264	0.0344553	-0.0103483	0.0610346	0.0996048	-0.102185	0.0252363	0.00906228	0.0316277	-0.0149077	0.00690701	-0.0673274	0.0892086	0.0373656	0.0331379	0.34749
5.56082e-29	1.72673e-28	1.06664e-28	-6.45298e-28	6.66846e-28	-3.90713e-28	-2.20878e-28	-3.11005e-26	-3.19282e-26	-1.80801e-25	6.88382e-26	-4.03854e-24	-1.56472e-23	7.09597e-25	2.0301e-24	-1.45721e-22	-3.22993e-23	-1.35073e-19	9.38682e-19	5.96369e-19	-6.23461e-19	3.75731e-18	3.72099e-18	2.87517e-18	-8.0679e-18	-7.07507e-17	-3.46918e-17	1.18508e-17	3.55891e-17	1.23301e-17	-2.57364e-17	-7.29197e-18	-9.9175e-18	6.79625e-18	1.13535e-16	-4.27941e-18	-3.95213e-17	1.04363e-16	1.04828e-16	-6.96774e-17	1.41804e-17	2.97648e-17	4.04315e-17	1.19944e-16	-8.15274e-17	-2.11425e-15	-1.83636e-15	1.39317e-15	-1.6825e-15	-6.40274e-17
1.35972e-05	3.69308e-05	5.51695e-06	-2.31624e-05	0.000118461	4.37832e-05	-6.76279e-05	-1.8451e-06	0.00252968	-0.00570486	-0.00209554	0.0164568	0.0242431	0.0504836	-0.495085	0.0367829	0.0155953	0.000140649	-0.00141989	0.00196424	0.00106121	-0.0028056	-0.000177137	0.000628659	0.00247496	0.00572969	0.0032114	-0.000497461	0.0191793	-0.0164354	0.00963165	-0.00280863	0.00323697	0.0269649	0.0994858	-0.0293441	-0.00166817	-0.0165417	-0.0297355	-0.0252999	0.0200272	-0.0597191	-0.0236764	-0.0122688	-0.00703435	0.0889779	0.127269	-0.0230384	-0.182802	0.060514
-4.59089e-09	4.20875e-09	1.23041e-08	8.09323e-09	-4.42618e-09	-1.86691e-09	1.18259e-08	2.54026e-08	-2.30706e-07	-3.81894e-07	3.32227e-07	-2.66538e-06	-3.12581e-06	7.71821e-06	8.80695e-06	3.38472e-06	-1.91111e-06	-2.6074e-05	0.000360788	0.000195616	-0.00034369	-8.04764e-05	0.000326903	0.000320519	4.1336e-05	0.000449436	0.0011345	-0.000272995	0.000443609	-0.000401244	-0.00292981	-0.0032578	0.000430631	-0.00119678	-0.00266414	0.000816325	0.00414753	0.00325716	0.000105899	0.00193431	0.00138195	-0.00138827	0.00183029	-0.00210856	-0.0113974	0.0107656	-0.013982	0.0013716	0.00205455	-0.0793544
3.88274e-37	5.6963e-37	6.00168e-37	-4.44027e-38	3.96281e-36	-7.03748e-36	2.55331e-36	2.02944e-37	-3.84241e-35	3.30094e-35	-1.17577e-34	8.77954e-34	9.28227e-34	-2.75696e-34	-5.73352e-34	-3.35193e-33	2.56474e-33	-8.04944e-32	-2.98704e-32	-4.32287e-32	5.98453e-32	-1.06403e-31	6.71119e-32	7.84239e-32	4.18584e-32	-8.49769e-35	-9.23625e-32	-1.21961e-31	-1.15098e-31	3.45346e-31	2.09139e-31	-2.37734e-31	1.78386e-31	-5.05495e-32	2.04615e-31	4.08288e-31	-6.4049e-31	3.9152e-32	-1.80855e-31	2.71725e-31	-8.05069e-32	-3.46916e-31	2.38083e-31	5.47062e-31	4.70681e-31	2.6417e-30	-1.71636e-30	-1.64059e-29	-2.20557e-29	3.31885e-30
-3.47085e-29	-1.07879e-28	-6.69946e-29	4.03992e-28	-4.17772e-28	2.44721e-28	1.3852e-28	1.94746e-26	1.99901e-26	1.1321e-25	-4.31214e-26	2.52898e-24	9.79866e-24	-4.44337e-25	-1.27139e-24	9.12544e-23	2.02269e-23	8.45861e-20	-5.87827e-19	-3.73462e-19	3.90428e-19	-2.35293e-18	-2.33019e-18	-1.80051e-18	5.05233e-18	4.43059e-17	2.17249e-17	-7.42127e-18	-2.22869e-17	-7.72144e-18	1.61168e-17	4.56643e-18	6.2106e-18	-4.25599e-18	-7.10984e-17	2.67988e-18	2.47493e-17	-6.53548e-17	-6.56461e-17	4.36338e-17	-8.88015e-18	-1.86395e-17	-2.53193e-17	-7.51121e-17	5.10546e-17	1.324e-15	1.14997e-15	-8.72439e-16	1.05363e-15	4.00957e-17
-9.8465e-29	-3.05962e-28	-1.88465e-28	1.14137e-27	-1.17926e-27	6.91312e-28	3.91133e-28	5.50346e-26	5.64693e-26	3.19997e-25	-1.21842e-25	7.14745e-24	2.7693e-23	-1.25572e-24	-3.59294e-24	2.57902e-22	5.71651e-23	2.39058e-19	-1.66132e-18	-1.05548e-18	1.10343e-18	-6.64987e-18	-6.58559e-18	-5.08862e-18	1.4279e-17	1.25218e-16	6.13992e-17	-2.09741e-17	-6.29874e-17	-2.18224e-17	4.55494e-17	1.29057e-17	1.75525e-17	-1.20283e-17	-2.00939e-16	7.57392e-18	6.99467e-17	-1.84706e-16	-1.8553e-16	1.23318e-16	-2.50972e-17	-5.26791e-17	-7.15576e-17	-2.12283e-16	1.44291e-16	3.7419e-15	3.25007e-15	-2.4657e-15	2.97777e-15	1.13319e-16
3.27077e-27	1.01568e-26	6.25253e-27	-3.79179e-26	3.91772e-26	-2.29368e-26	-1.29542e-26	-1.8269e-24	-1.87749e-24	-1.06218e-23	4.0455e-24	-2.37247e-22	-9.19238e-22	4.16822e-23	1.19265e-22	-8.56067e-21	-1.8975e-21	-7.93519e-18	5.51452e-17	3.50352e-17	-3.66268e-17	2.20733e-16	2.18599e-16	1.68909e-16	-4.73969e-16	-4.15643e-15	-2.03806e-15	6.96204e-16	2.09077e-15	7.24364e-16	-1.51195e-15	-4.28386e-16	-5.82629e-16	3.99263e-16	6.66988e-15	-2.51405e-16	-2.32178e-15	6.13106e-15	6.15839e-15	-4.09338e-15	8.33065e-16	1.74861e-15	2.37525e-15	7.04641e-15	-4.78954e-15	-1.24207e-13	-1.07881e-13	8.18452e-14	-9.88428e-14	-3.76145e-15
1.11918e-32	3.47364e-32	2.16038e-32	-1.29934e-31	1.34545e-31	-7.85373e-32	-4.43845e-32	-6.26474e-30	-6.43265e-30	-3.64289e-29	1.38723e-29	-8.13551e-28	-3.15219e-27	1.42968e-28	4.08973e-28	-2.93558e-26	-6.50703e-27	-2.7211e-23	1.89101e-22	1.20141e-22	-1.25599e-22	7.56926e-22	7.4961e-22	5.79215e-22	-1.62531e-21	-1.4253e-20	-6.98881e-21	2.38739e-21	7.16958e-21	2.48395e-21	-5.18469e-21	-1.469e-21	-1.99792e-21	1.36913e-21	2.2872e-20	-8.62106e-22	-7.96172e-21	2.10243e-20	2.11181e-20	-1.40368e-20	2.8567e-21	5.99624e-21	8.14509e-21	2.41632e-20	-1.6424e-20	-4.25924e-19	-3.69941e-19	2.80659e-19	-3.38947e-19	-1.28986e-20
0.000151977	0.000511186	0.000817895	0.000333946	-0.00155555	0.00137961	-0.000602302	-0.000519639	-0.0007582	-0.447101	0.000842172	-0.00268427	-0.00351732	-0.00153906	0.00471436	-0.000391951	0.000210856	0.000226501	-0.000911878	0.000915498	-0.000198416	-0.00119434	0.00257327	0.000177526	0.0021941	-0.000277719	-0.00166929	0.00347116	0.00146284	0.000505581	0.00200418	-0.00642216	0.00814976	0.0271592	-0.00956778	-0.0187519	-0.0289104	0.0123987	-0.0295883	0.0219487	-0.0151326	0.0519484	0.0358813	-0.203379	-0.0169324	-0.00248777	0.00404239	0.00678487	0.00906873	-0.00460299
-1.57773e-30	1.33796e-30	-1.26218e-29	2.32136e-29	-1.66162e-29	-2.01606e-29	-1.14953e-29	-2.40493e-29	-5.23696e-28	9.41714e-28	1.01996e-27	-1.34075e-26	3.89958e-27	-6.1995e-27	1.20773e-26	1.88437e-26	-5.08122e-27	-1.47695e-26	-9.4684e-26	-3.96817e-25	-2.11193e-25	7.35877e-25	3.95635e-25	3.84372e-26	-1.28198e-24	1.21955e-24	-3.97801e-25	-2.39203e-24	7.60463e-25	2.25821e-24	-5.46313e-24	7.97989e-25	-2.80874e-24	1.72553e-23	7.07934e-25	4.24264e-24	-5.69162e-24	6.96793e-24	1.24603e-24	3.68133e-24	8.23444e-24	-5.01493e-24	-2.0544e-24	2.08348e-24	5.57131e-24	1.55318e-23	5.96957e-23	9.95424e-23	-5.37574e-23	5.09521e-23
2.59381e-30	8.05245e-30	4.94475e-30	-3.00836e-29	3.10845e-29	-1.82301e-29	-1.02732e-29	-1.44944e-27	-1.4897e-27	-8.42732e-27	3.20932e-27	-1.8824e-25	-7.29307e-25	3.30745e-26	9.46254e-26	-6.79205e-24	-1.50547e-24	-6.29576e-21	4.37521e-20	2.77969e-20	-2.90596e-20	1.75129e-19	1.73436e-19	1.34012e-19	-3.76046e-19	-3.2977e-18	-1.61699e-18	5.52367e-19	1.65882e-18	5.74708e-19	-1.19958e-18	-3.3988e-19	-4.62256e-19	3.16774e-19	5.29187e-18	-1.99464e-19	-1.84209e-18	4.86437e-18	4.88606e-18	-3.24767e-18	6.60952e-19	1.38734e-18	1.88452e-18	5.59061e-18	-3.80001e-18	-9.85454e-17	-8.55928e-17	6.49358e-17	-7.84217e-17	-2.98433e-18
0.000138736	-9.4917e-05	0.000859258	4.22403e-05	0.000660544	-0.000672665	-6.28622e-05	0.000446982	0.0289923	0.000619359	0.37992	0.0036046	0.00121703	0.000834094	-0.0016096	-0.00572152	-0.000415975	-0.00260469	0.00241286	-0.00126286	0.021404	-0.0172315	0.00178707	0.0276237	0.00118147	0.00343773	0.0039485	0.0221795	0.0194455	-0.0504155	-0.0394441	-0.0677287	-0.00361248	-0.0270516	-0.0196799	0.0207327	-0.0853364	0.0151096	-0.0362662	-0.00841108	0.0300577	0.0111641	-0.00357929	0.00887512	-0.00860689	0.0291377	0.0190375	-0.000169455	-0.0206667	-0.0655075
-6.24503e-31	-1.9416e-30	-1.2059e-30	7.26134e-30	-7.51169e-30	4.38576e-30	2.48435e-30	3.49776e-28	3.591e-28	2.03365e-27	-7.74911e-28	4.54259e-26	1.76006e-25	-7.9826e-27	-2.28358e-26	1.6391e-24	3.6332e-25	1.51934e-21	-1.05586e-20	-6.70816e-21	7.01289e-21	-4.22635e-20	-4.1855e-20	-3.23409e-20	9.07504e-20	7.95826e-19	3.90225e-19	-1.33301e-19	-4.00318e-19	-1.38693e-19	2.89491e-19	8.20225e-20	1.11555e-19	-7.64464e-20	-1.27708e-18	4.81363e-20	4.44548e-19	-1.17391e-18	-1.17914e-18	7.83754e-19	-1.59506e-19	-3.34804e-19	-4.54786e-19	-1.34917e-18	9.17047e-19	2.37817e-17	2.06559e-17	-1.56708e-17	1.89253e-17	7.20201e-19
-1.5028e-29	-4.66688e-29	-2.87755e-29	1.74552e-28	-1.80349e-28	1.05611e-28	5.96681e-29	8.40591e-27	8.63488e-27	4.88689e-26	-1.86185e-26	1.0916e-24	4.22934e-24	-1.91786e-25	-5.48744e-25	3.93873e-23	8.7303e-24	3.65094e-20	-2.5372e-19	-1.61195e-19	1.68518e-19	-1.01558e-18	-1.00576e-18	-7.77143e-19	2.18071e-18	1.91235e-17	9.377e-18	-3.2032e-18	-9.61955e-18	-3.33276e-18	6.95639e-18	1.97098e-18	2.68064e-18	-1.83699e-18	-3.06878e-17	1.1567e-18	1.06824e-17	-2.82087e-17	-2.83344e-17	1.88334e-17	-3.83289e-18	-8.04525e-18	-1.09284e-17	-3.24202e-17	2.20364e-17	5.71469e-16	4.96357e-16	-3.76565e-16	4.54771e-16	1.73062e-17
-4.76532e-06	-3.41239e-05	5.49292e-06	-1.43971e-05	8.49332e-06	-6.13098e-05	1.74323e-05	2.99918e-05	-0.000198915	0.000156433	6.02487e-05	-0.00719344	-0.0204507	0.0145134	-0.0267895	-0.353224	-0.0231342	-0.00345023	0.00781693	0.0240248	0.0359615	-0.00343575	0.0305137	-0.101029	-0.0288092	0.0457682	-0.129766	-0.0122057	0.0357491	0.00606974	0.00163208	0.00913819	0.0196128	-0.0149691	-0.017267	-0.0596499	0.0142768	-0.0771069	-0.107943	0.104075	-0.05032	-0.00317536	-0.0527725	0.0163916	-0.00264013	0.32931	-0.17053	0.453803	-0.134017	0.650079
1.2498e-08	4.04008e-08	-5.6847e-08	-1.12727e-07	-1.35115e-08	4.22888e-09	6.71849e-08	-3.00817e-07	3.2972e-07	4.28034e-06	1.69036e-06	1.50728e-05	-1.7586e-05	-5.43326e-05	1.98237e-05	6.71767e-05	3.67221e-05	-0.0015817	0.00181161	-0.00258834	0.00128576	-0.00186086	-0.00448044	-0.00047511	0.0147151	0.00532301	-0.00712915	-0.00415842	-0.0118094	0.0171592	-0.0588264	0.0264692	0.025213	-0.0140666	-0.0164278	-0.0175051	0.0447914	-0.0264361	-0.00597827	-0.0272497	-0.0212958	0.0595345	0.0173205	0.0655049	-0.628625	0.00222468	-0.0230813	-0.179095	-0.206458	0.0616551
-1.35903e-05	-3.69343e-05	-5.50831e-06	2.31432e-05	-0.000118439	-4.37856e-05	6.75701e-05	1.8516e-06	-0.00252733	0.0057016	0.00209502	-0.016452	-0.0242265	-0.0504753	0.494899	-0.0368063	-0.0156225	-7.5387e-05	0.00114664	-0.00178727	0.000199598	0.00277762	-6.7863e-05	-0.000230261	-0.00111884	-0.00546052	-0.000348839	0.00461671	-0.0193629	0.019066	-0.0117896	0.00740261	0.00205001	-0.0270223	-0.0915479	0.0281952	-0.00271209	0.0141245	0.0267967	0.0209016	-0.0262126	0.0616258	0.0239676	0.0203459	0.00985732	0.0308249	0.04398	-0.000916462	-0.0613654	0.0237182
-5.9206e-28	-1.83415e-27	-1.13097e-27	6.8486e-27	-7.08968e-27	4.14549e-27	2.33855e-27	3.30238e-25	3.39434e-25	1.92018e-24	-7.3119e-25	4.28863e-23	1.6616e-22	-7.53601e-24	-2.15585e-23	1.54741e-21	3.42993e-22	1.43435e-18	-9.96794e-18	-6.3329e-18	6.62059e-18	-3.98992e-17	-3.95136e-17	-3.05317e-17	8.56737e-17	7.51308e-16	3.68395e-16	-1.25844e-16	-3.77924e-16	-1.30935e-16	2.73297e-16	7.74341e-17	1.05315e-16	-7.21699e-17	-1.20564e-15	4.54435e-17	4.1968e-16	-1.10824e-15	-1.11318e-15	7.3991e-16	-1.50583e-16	-3.16075e-16	-4.29345e-16	-1.2737e-15	8.65747e-16	2.24514e-14	1.95004e-14	-1.47942e-14	1.78666e-14	6.79913e-16
9.10209e-35	-1.88685e-34	-4.087e-34	-1.95654e-34	-3.16906e-34	-7.20375e-34	-3.9617e-34	4.37007e-34	-1.5467e-32	-1.92511e-32	-9.70705e-33	3.09543e-31	5.86457e-32	-5.05914e-31	1.12294e-31	-1.0458e-31	4.57781e-31	-3.54745e-30	3.63384e-30	4.8124e-30	4.21037e-30	8.3921e-30	2.28435e-30	1.10864e-29	-1.62627e-29	-4.12466e-31	4.46497e-29	2.60856e-29	-3.92683e-29	-4.8565e-29	2.30654e-29	2.85767e-29	2.77704e-29	1.40512e-28	7.50643e-29	9.5079e-29	-1.41527e-28	-4.16881e-28	8.55973e-30	-1.07467e-28	-3.91727e-28	-4.39544e-28	6.71049e-29	-2.82117e-29	3.37716e-28	-7.2716e-28	5.85722e-28	-1.77571e-27	8.81152e-28	-1.02912e-27
-2.58668e-30	-8.02085e-30	-4.95422e-30	3.00333e-29	-3.10492e-29	1.82258e-29	1.02702e-29	1.44862e-27	1.48841e-27	8.42222e-27	-3.20481e-27	1.88125e-25	7.28878e-25	-3.30559e-26	-9.45667e-26	6.78797e-24	1.50459e-24	6.292e-21	-4.37259e-20	-2.77802e-20	2.90422e-20	-1.75024e-19	-1.73332e-19	-1.33932e-19	3.75821e-19	3.29573e-18	1.61602e-18	-5.52036e-19	-1.65782e-18	-5.74365e-19	1.19886e-18	3.39677e-19	4.6198e-19	-3.16585e-19	-5.28871e-18	1.99345e-19	1.84099e-18	-4.86146e-18	-4.88313e-18	3.24573e-18	-6.60556e-19	-1.38651e-18	-1.88339e-18	-5.58726e-18	3.79773e-18	9.84865e-17	8.55416e-17	-6.4897e-17	7.83748e-17	2.98254e-18
1.00433e-27	3.11307e-27	1.90479e-27	-1.16317e-26	1.20036e-26	-7.0746e-27	-3.9977e-27	-5.61052e-25	-5.75546e-25	-3.26147e-24	1.24122e-24	-7.28607e-23	-2.82288e-22	1.27977e-23	3.66271e-23	-2.62895e-21	-5.82696e-22	-2.43685e-18	1.69348e-17	1.07591e-17	-1.12479e-17	6.77858e-17	6.71306e-17	5.18711e-17	-1.45553e-16	-1.27641e-15	-6.25876e-16	2.138e-16	6.42065e-16	2.22448e-16	-4.6431e-16	-1.31555e-16	-1.78922e-16	1.22611e-16	2.04828e-15	-7.72051e-17	-7.13005e-16	1.88281e-15	1.89121e-15	-1.25705e-15	2.55829e-16	5.36987e-16	7.29426e-16	2.16391e-15	-1.47084e-15	-3.81432e-14	-3.31298e-14	2.51342e-14	-3.03541e-14	-1.15512e-15
8.31959e-29	2.58587e-28	1.60963e-28	-9.67497e-28	1.00146e-27	-5.84892e-28	-3.31009e-28	-4.66325e-26	-4.78665e-26	-2.71138e-25	1.0329e-25	-6.05591e-24	-2.34638e-23	1.06435e-24	3.0443e-24	-2.18513e-22	-4.84363e-23	-2.02549e-19	1.4076e-18	8.94288e-19	-9.34913e-19	5.63429e-18	5.57983e-18	4.31148e-18	-1.20982e-17	-1.06094e-16	-5.20222e-17	1.77709e-17	5.33678e-17	1.84897e-17	-3.85931e-17	-1.09347e-17	-1.48718e-17	1.01913e-17	1.70251e-16	-6.41721e-18	-5.92643e-17	1.56498e-16	1.57195e-16	-1.04485e-16	2.12643e-17	4.46339e-17	6.06292e-17	1.79862e-16	-1.22255e-16	-3.17043e-15	-2.75371e-15	2.08913e-15	-2.523e-15	-9.60125e-17
-4.58118e-29	-1.87983e-28	1.78101e-28	-4.15735e-29	-4.29576e-28	5.75586e-28	1.29372e-28	4.82769e-29	5.75686e-27	-4.28918e-27	2.60161e-26	-2.14281e-26	-1.12153e-25	-1.76884e-26	5.14905e-26	5.24824e-25	2.07997e-25	-3.08056e-24	2.79882e-24	3.02941e-24	6.46431e-24	1.58922e-24	-4.52595e-24	1.94429e-24	-1.24979e-23	1.19575e-23	-4.02146e-23	-7.84555e-24	3.24367e-23	-5.93484e-24	2.68463e-23	-3.99969e-24	-3.52836e-23	-2.47605e-23	-2.01668e-23	1.40391e-23	-2.95634e-23	1.59462e-22	1.32087e-22	-1.26774e-22	-1.29405e-23	1.17897e-22	4.19828e-23	-4.77576e-23	-5.58263e-22	2.66784e-22	-6.2629e-22	-2.27817e-22	-1.81286e-21	3.92757e-22
-2.64897e-30	-8.22329e-30	-5.1203e-30	3.07985e-29	-3.18785e-29	1.86207e-29	1.05158e-29	1.48415e-27	1.52556e-27	8.62878e-27	-3.28756e-27	1.92744e-25	7.4677e-25	-3.38743e-26	-9.68925e-26	6.95453e-24	1.54153e-24	6.44638e-21	-4.47988e-20	-2.84619e-20	2.97548e-20	-1.79319e-19	-1.77585e-19	-1.37218e-19	3.85042e-19	3.37659e-18	1.65567e-18	-5.65581e-19	-1.6985e-18	-5.88457e-19	1.22827e-18	3.48011e-19	4.73315e-19	-3.24352e-19	-5.41847e-18	2.04236e-19	1.88616e-18	-4.98074e-18	-5.00295e-18	3.32537e-18	-6.76764e-19	-1.42053e-18	-1.9296e-18	-5.72435e-18	3.89092e-18	1.00903e-16	8.76405e-17	-6.64893e-17	8.02978e-17	3.05572e-18
-0.000152071	-0.000511546	-0.000818465	-0.000333784	0.00155662	-0.00138033	0.000602522	0.000519922	0.000757458	0.447374	-0.000855314	0.00267682	0.00362013	0.0015692	-0.00465239	0.000323364	0.000132297	0.00111874	-0.00331859	0.00357466	-0.000722022	-0.00472734	0.00982329	0.00062826	0.00898522	-0.00203029	-0.00712389	0.0144168	0.00708247	0.00101581	0.00725468	-0.0270558	0.0353523	0.109973	-0.0401052	-0.0739763	-0.116875	0.0519458	-0.11956	0.0929875	-0.0555877	0.206069	0.146655	-0.815789	-0.0692509	-0.0135539	0.0272947	0.00347318	-0.0128244	0.00534708
-1.69066e-31	-2.46835e-31	-6.71278e-31	-1.92872e-30	1.49328e-30	2.5296e-31	-8.55445e-31	7.55626e-31	-1.77588e-29	-4.09274e-29	1.11666e-28	8.84716e-29	2.86011e-28	9.98652e-28	-9.01213e-29	-2.40764e-28	-8.85286e-28	3.21259e-26	1.91133e-26	1.28571e-26	-2.01196e-26	1.3149e-26	-2.61405e-26	1.70828e-26	7.75002e-26	-2.86894e-26	2.82399e-26	-1.4624e-25	7.7597e-26	1.10748e-25	1.3387e-25	-2.28278e-25	-4.43897e-25	-2.19654e-25	2.04357e-25	9.54397e-25	-2.93749e-25	-1.08744e-25	-7.92663e-25	-2.85585e-25	-8.21503e-25	-6.47293e-26	4.79615e-25	-1.62555e-25	3.73678e-26	-1.56567e-25	1.47231e-24	1.56476e-24	-1.58037e-24	-6.41274e-24
3.25794e-17	-8.82e-18	1.42032e-17	-8.05734e-18	-3.38427e-17	4.25658e-17	8.06963e-18	-1.6483e-17	-3.34999e-16	-6.78749e-17	4.51621e-16	4.36854e-15	1.20095e-15	5.97067e-15	-7.05162e-15	1.65264e-14	-6.70854e-15	1.64159e-13	1.2202e-12	4.21656e-14	-4.86941e-13	1.30198e-13	-3.64135e-14	1.59959e-12	-2.6198e-12	-1.72625e-12	2.14321e-12	-2.73819e-12	-2.38183e-12	-5.96189e-12	-4.13867e-12	-9.37745e-13	2.03034e-12	1.03789e-11	-5.7353e-12	-1.25097e-11	-6.0398e-12	2.29829e-12	-3.7796e-12	-1.07989e-12	3.20201e-12	-1.12518e-11	6.03892e-12	6.49542e-12	-2.72343e-11	-1.76273e-11	-2.82831e-11	-3.29978e-11	-4.36185e-11	-1.55825e-10
1.19295e-33	-5.16254e-34	4.38802e-33	-1.07872e-32	7.54652e-33	-5.71771e-34	-3.55312e-33	8.34385e-33	-1.33097e-31	-1.32429e-31	4.80658e-31	-2.57527e-30	-1.31741e-30	-4.97479e-31	1.89164e-30	1.04031e-29	1.19297e-29	-5.73713e-29	-6.6126e-29	-3.00985e-28	3.73019e-28	-2.71785e-29	2.54043e-28	1.95562e-28	-3.05082e-28	1.59304e-28	5.23038e-28	-2.19884e-28	3.44267e-28	3.32676e-28	-7.75459e-28	1.14654e-27	-1.46407e-27	-6.70215e-29	-8.80631e-28	-4.7291e-28	5.58298e-28	1.19556e-27	-1.4268e-27	-8.9864e-28	-2.31929e-27	1.07288e-27	9.06718e-28	-4.66679e-28	-1.05436e-26	-7.84931e-27	5.85886e-28	8.95048e-27	2.33323e-26	-1.07026e-26
0.00384646	-0.317825	-0.0563218	-0.0180367	0.0420649	-0.0796445	0.0259957	0.00555872	-0.00256539	-0.0007873	-0.0432605	-0.00793443	-0.011309	0.0067433	-0.0236001	-0.312522	-0.0198431	0.00773198	-0.0657838	-0.185754	-0.239077	0.0105518	-0.306367	0.766494	0.0434294	-0.0292369	0.0617918	0.0131391	-0.0185148	-0.00910385	0.0283427	-0.00420919	0.0180302	0.00162407	0.00202193	0.00154309	-0.000733407	-0.00512103	0.00467905	-0.00148644	0.000616296	0.000479223	0.00327228	-0.00262879	-2.53139e-05	0.000645212	-0.000509477	-0.0010365	-0.000323888	0.000699732
1.19838e-28	3.71866e-28	2.30149e-28	-1.38874e-27	1.43754e-27	-8.38811e-28	-4.73112e-28	-6.69129e-26	-6.87906e-26	-3.89085e-25	1.48201e-25	-8.68939e-24	-3.36673e-23	1.5272e-24	4.36823e-24	-3.13537e-22	-6.94995e-23	-2.90629e-19	2.01971e-18	1.28318e-18	-1.34147e-18	8.08442e-18	8.00628e-18	6.18637e-18	-1.73593e-17	-1.52231e-16	-7.46446e-17	2.54987e-17	7.65754e-17	2.65301e-17	-5.53756e-17	-1.56898e-17	-2.1339e-17	1.46231e-17	2.44287e-16	-9.2078e-18	-8.5036e-17	2.24552e-16	2.25553e-16	-1.49921e-16	3.05113e-17	6.40434e-17	8.69944e-17	2.58077e-16	-1.75419e-16	-4.54912e-15	-3.95119e-15	2.99761e-15	-3.62015e-15	-1.37765e-16
0.000138739	-9.49242e-05	0.000859257	4.22331e-05	0.000660542	-0.000672686	-6.28401e-05	0.000446953	0.0289921	0.000619492	0.37992	0.00360266	0.00123348	0.000811247	-0.00160911	-0.00576069	-0.000423966	-0.00271215	0.00200707	-0.00145714	0.021358	-0.0178303	0.00134343	0.027115	0.0013643	0.00228218	0.00429818	0.0212312	0.0212329	-0.0487079	-0.0363423	-0.0587466	-0.0010243	-0.0283009	-0.0182339	-0.00162683	-0.0835267	0.0163657	-0.0330393	-0.00993703	0.0334759	0.00618004	-0.0261546	0.00846788	-0.00107331	0.0129298	-0.0251799	0.00671149	-0.00167239	0.0205747
7.12049e-28	2.21275e-27	1.37124e-27	-8.28382e-27	8.56731e-27	-5.0242e-27	-2.83486e-27	-3.99454e-25	-4.10452e-25	-2.32233e-24	8.84573e-25	-5.18787e-23	-2.00998e-22	9.11523e-24	2.60795e-23	-1.87186e-21	-4.14902e-22	-1.7351e-18	1.2058e-17	7.66076e-18	-8.00877e-18	4.82652e-17	4.77987e-17	3.69335e-17	-1.03638e-16	-9.0884e-16	-4.4564e-16	1.52231e-16	4.57167e-16	1.58389e-16	-3.30601e-16	-9.36703e-17	-1.27397e-16	8.73023e-17	1.45843e-15	-5.4972e-17	-5.07677e-16	1.34061e-15	1.34659e-15	-8.95053e-16	1.82157e-16	3.82349e-16	5.19369e-16	1.54076e-15	-1.04727e-15	-2.71589e-14	-2.35892e-14	1.78962e-14	-2.16129e-14	-8.22475e-16
-5.07374e-30	-1.57599e-29	-9.77655e-30	5.89815e-29	-6.09873e-29	3.56414e-29	2.01427e-29	2.8401e-27	2.91744e-27	1.65116e-26	-6.29078e-27	3.68813e-25	1.42897e-24	-6.48164e-26	-1.85399e-25	1.33078e-23	2.94981e-24	1.23355e-20	-8.57248e-20	-5.44632e-20	5.69374e-20	-3.43136e-19	-3.39819e-19	-2.62574e-19	7.36798e-19	6.46128e-18	3.16822e-18	-1.08227e-18	-3.25017e-18	-1.12604e-18	2.35037e-18	6.65937e-19	9.05713e-19	-6.20665e-19	-1.03685e-17	3.90816e-19	3.60927e-18	-9.5309e-18	-9.5734e-18	6.36327e-18	-1.29502e-18	-2.71826e-18	-3.69239e-18	-1.09538e-17	7.44547e-18	1.93083e-16	1.67705e-16	-1.27231e-16	1.53654e-16	5.84728e-18
-6.15617e-29	-1.91199e-28	-1.17991e-28	7.14694e-28	-7.38448e-28	4.3344e-28	2.44514e-28	3.44548e-26	3.53634e-26	2.00309e-25	-7.62818e-26	4.47461e-24	1.7336e-23	-7.86029e-25	-2.24926e-24	1.61449e-22	3.57853e-23	1.49652e-19	-1.04e-18	-6.60741e-19	6.90757e-19	-4.16287e-18	-4.12264e-18	-3.18552e-18	8.93874e-18	7.83874e-17	3.84364e-17	-1.31299e-17	-3.94306e-17	-1.3661e-17	2.85143e-17	8.07906e-18	1.0988e-17	-7.52983e-18	-1.2579e-16	4.74133e-18	4.37872e-17	-1.15628e-16	-1.16143e-16	7.71983e-17	-1.5711e-17	-3.29776e-17	-4.47956e-17	-1.32891e-16	9.03274e-17	2.34246e-15	2.03457e-15	-1.54355e-15	1.86411e-15	7.09385e-17
6.16684e-29	1.91422e-28	1.17721e-28	-7.14882e-28	7.38437e-28	-4.33255e-28	-2.44568e-28	-3.44548e-26	-3.5363e-26	-2.00307e-25	7.62763e-26	-4.47455e-24	-1.7336e-23	7.86e-25	2.24933e-24	-1.61449e-22	-3.57855e-23	-1.49652e-19	1.04e-18	6.60741e-19	-6.90757e-19	4.16287e-18	4.12264e-18	3.18552e-18	-8.93874e-18	-7.83874e-17	-3.84364e-17	1.31299e-17	3.94306e-17	1.3661e-17	-2.85143e-17	-8.07906e-18	-1.0988e-17	7.52983e-18	1.2579e-16	-4.74133e-18	-4.37872e-17	1.15628e-16	1.16143e-16	-7.71983e-17	1.5711e-17	3.29776e-17	4.47956e-17	1.32891e-16	-9.03274e-17	-2.34246e-15	-2.03457e-15	1.54355e-15	-1.86411e-15	-7.09385e-17
0.632013	0.0131256	-0.00668051	0.00203433	0.00996514	-0.010832	0.00173889	0.0109274	-4.90476e-05	0.000139147	-0.000172107	0.000431414	-0.0003206	-0.000293856	-0.000509132	-0.00175822	0.00100892	0.0860411	-0.132197	-0.252783	0.0681721	0.0181301	0.0730459	-0.0231914	-0.0130325	0.00877908	0.00559789	-0.00571957	0.00420631	0.00321324	0.000656079	0.00329527	0.00343168	0.00142411	0.00049706	-0.000197876	0.000648765	0.000471297	0.000390851	-0.000734388	-0.00026278	-0.000209791	0.000240882	-1.46937e-06	9.18914e-05	-0.000735872	-0.000255126	-0.000283252	-9.77285e-05	-0.00015413
-0.00398961	0.317884	0.0554671	0.017981	-0.0427214	0.0802652	-0.0259142	-0.0059782	-0.0266574	0.000421979	-0.336672	-0.00304677	-0.0101856	0.00576739	-0.00107053	-0.0340128	-0.0014229	-0.0146651	0.0117102	-0.00826206	0.128426	-0.104717	0.00987799	0.163353	0.00824274	0.0163294	0.0250719	0.132395	0.119668	-0.291315	-0.214868	-0.358236	-0.0161206	-0.162131	-0.110267	0.0409434	-0.511696	0.102242	-0.21428	-0.0612893	0.206594	0.0426401	-0.101065	0.0780285	-0.0331693	0.0011103	-0.00746563	-0.000160742	-0.000548623	0.00576283
-0.000754522	0.0040286	-0.0255584	-0.0398503	-0.393761	-0.44441	-0.241568	-0.012751	-0.0039423	0.00280153	-0.00269205	-0.0953958	-0.211916	-0.176018	-0.0300927	0.0127133	0.0178803	-0.00068084	-0.00210847	-0.00202505	-0.0132794	0.0104504	-0.00509989	-0.0208583	0.00104868	-0.00674793	0.00038787	0.0599397	0.040631	0.0402441	0.00107918	-0.0520383	-0.0426003	0.00647052	-0.215175	-0.608267	-0.0720159	0.0415354	0.126686	-0.144683	-0.0521791	-0.125186	0.0895257	0.0328016	0.0103271	-0.000345305	0.00290623	0.00320922	-0.000637666	-0.00977573
2.40603e-09	1.3327e-08	-4.36319e-09	-6.74556e-09	-1.68906e-09	-4.77087e-09	1.05538e-08	-3.4827e-08	-1.27385e-08	4.94661e-07	1.37249e-07	1.10788e-06	-6.58204e-06	-3.72518e-06	2.77118e-06	6.39691e-07	6.38698e-06	-9.28266e-05	8.19563e-05	-2.0201e-05	5.89929e-05	-3.87081e-05	-0.000441318	-0.000201562	0.00172148	0.000337052	-0.000812903	-0.000549313	-0.00129523	0.00212924	-0.00530102	0.00220513	0.00290829	-0.00162193	0.000844152	-0.000424749	-0.000661069	-0.00506872	-0.000949494	-0.00429131	-0.00589901	0.00359503	0.000873095	0.00129651	-0.0586746	0.00710302	-0.00856867	0.00634641	0.0110774	-0.0114388
-0.00385119	0.317793	0.0563285	0.0180209	-0.04206	0.0795927	-0.0259822	-0.00553649	0.00239979	0.00118727	0.0433076	0.00142373	-0.00885573	0.0050942	-0.00331274	-0.0382383	-0.00605218	-0.607959	-0.282574	-0.208609	-0.48456	0.297321	-0.18678	-0.166077	0.00356971	-0.0325955	0.00339317	0.0214037	0.0366951	-0.038576	0.00458037	0.00220976	-0.00288049	-0.0051247	0.00170567	0.00587596	0.0008593	-0.00322084	0.00155984	-3.88505e-05	-0.00293341	0.00130843	0.00433507	-0.00398608	-0.0015697	-0.000496014	0.000788002	0.000344598	0.000202492	0.000511442
3.35565e-30	1.04128e-29	6.4085e-30	-3.89191e-29	4.02e-29	-2.36047e-29	-1.33107e-29	-1.87604e-27	-1.92517e-27	-1.09065e-26	4.1539e-27	-2.43626e-25	-9.4392e-25	4.27944e-26	1.22479e-25	-8.79069e-24	-1.94844e-24	-8.14834e-21	5.66265e-20	3.59763e-20	-3.76106e-20	2.26662e-19	2.24471e-19	1.73447e-19	-4.86701e-19	-4.26808e-18	-2.0928e-18	7.14905e-19	2.14694e-18	7.43821e-19	-1.55256e-18	-4.39893e-19	-5.98279e-19	4.09988e-19	6.84905e-18	-2.58158e-19	-2.38414e-18	6.29575e-18	6.32382e-18	-4.20333e-18	8.55442e-19	1.79558e-18	2.43905e-18	7.23569e-18	-4.91819e-18	-1.27543e-16	-1.10779e-16	8.40437e-17	-1.01498e-16	-3.86249e-18
3.40043e-29	1.05498e-28	6.45132e-29	-3.94122e-28	4.06777e-28	-2.39818e-28	-1.35035e-28	-1.90028e-26	-1.95095e-26	-1.10473e-25	4.20636e-26	-2.46784e-24	-9.56125e-24	4.33429e-25	1.24058e-24	-8.90448e-23	-1.97361e-23	-8.25377e-20	5.73592e-19	3.64418e-19	-3.80973e-19	2.29595e-18	2.27376e-18	1.75691e-18	-4.92998e-18	-4.3233e-17	-2.11988e-17	7.24155e-18	2.17472e-17	7.53446e-18	-1.57265e-17	-4.45584e-18	-6.0602e-18	4.15292e-18	6.93767e-17	-2.61499e-18	-2.41499e-17	6.37721e-17	6.40564e-17	-4.25772e-17	8.66511e-18	1.81881e-17	2.47061e-17	7.32931e-17	-4.98183e-17	-1.29194e-15	-1.12213e-15	8.51311e-16	-1.02811e-15	-3.91247e-17
3.39004e-29	1.05281e-28	6.48008e-29	-3.93949e-28	4.06901e-28	-2.39765e-28	-1.35092e-28	-1.90028e-26	-1.95053e-26	-1.10468e-25	4.20608e-26	-2.46783e-24	-9.56126e-24	4.33433e-25	1.24059e-24	-8.90451e-23	-1.97361e-23	-8.25377e-20	5.73592e-19	3.64418e-19	-3.80973e-19	2.29595e-18	2.27376e-18	1.75691e-18	-4.92998e-18	-4.3233e-17	-2.11988e-17	7.24155e-18	2.17472e-17	7.53446e-18	-1.57265e-17	-4.45584e-18	-6.0602e-18	4.15292e-18	6.93767e-17	-2.61499e-18	-2.41499e-17	6.37721e-17	6.40564e-17	-4.25772e-17	8.66511e-18	1.81881e-17	2.47061e-17	7.32931e-17	-4.98183e-17	-1.29194e-15	-1.12213e-15	8.51311e-16	-1.02811e-15	-3.91247e-17
-6.15617e-29	-1.91199e-28	-1.17991e-28	7.14694e-28	-7.38448e-28	4.3344e-28	2.44514e-28	3.44548e-26	3.53634e-26	2.00309e-25	-7.62818e-26	4.47461e-24	1.7336e-23	-7.86029e-25	-2.24926e-24	1.61449e-22	3.57853e-23	1.49652e-19	-1.04e-18	-6.60741e-19	6.90757e-19	-4.16287e-18	-4.12264e-18	-3.18552e-18	8.93874e-18	7.83874e-17	3.84364e-17	-1.31299e-17	-3.94306e-17	-1.3661e-17	2.85143e-17	8.07906e-18	1.0988e-17	-7.52983e-18	-1.2579e-16	4.74133e-18	4.37872e-17	-1.15628e-16	-1.16143e-16	7.71983e-17	-1.5711e-17	-3.29776e-17	-4.47956e-17	-1.32891e-16	9.03274e-17	2.34246e-15	2.03457e-15	-1.54355e-15	1.86411e-15	7.09385e-17
3.06984e-30	9.52271e-30	5.83427e-30	-3.55349e-29	3.66905e-29	-2.15459e-29	-1.21732e-29	-1.7129e-27	-1.75808e-27	-9.95851e-27	3.79214e-27	-2.2247e-25	-8.61915e-25	3.90868e-26	1.11836e-25	-8.02693e-24	-1.77919e-24	-7.44044e-21	5.1707e-20	3.28508e-20	-3.43432e-20	2.06971e-19	2.0497e-19	1.58378e-19	-4.44418e-19	-3.89728e-18	-1.91099e-18	6.52797e-19	1.96042e-18	6.79201e-19	-1.41768e-18	-4.01676e-19	-5.46303e-19	3.74369e-19	6.25403e-18	-2.3573e-19	-2.17702e-18	5.7488e-18	5.77443e-18	-3.83816e-18	7.81125e-19	1.63959e-18	2.22716e-18	6.60708e-18	-4.49092e-18	-1.16463e-16	-1.01155e-16	7.67423e-17	-9.26802e-17	-3.52693e-18
-8.63303e-06	-7.31274e-05	-9.69762e-05	0.000110646	7.79977e-05	-0.000150974	0.000187233	8.0977e-05	0.00122332	0.00173083	0.00390163	-0.464635	0.0659483	0.171898	0.0061149	0.0125097	-0.00222506	-0.000218161	-0.0018898	0.000208831	0.000359989	-0.00245357	-0.000462553	-0.000372785	0.00108807	0.00538388	0.00102983	-0.00340943	0.0192	-0.0181224	0.0114545	-0.00667938	-0.000226166	0.0261621	0.0917659	-0.0282362	0.00309392	-0.0141283	-0.0283128	-0.0221138	0.0246411	-0.0596895	-0.024828	-0.0178897	-0.00936398	-0.0072868	0.00117157	-0.00103799	0.00283702	-0.0038885
-1.31414e-29	-4.08095e-29	-2.51129e-29	1.52259e-28	-1.57378e-28	9.20992e-29	5.20061e-29	7.33675e-27	7.53425e-27	4.26596e-26	-1.62533e-26	9.52906e-25	3.69196e-24	-1.67435e-25	-4.79043e-25	3.43825e-23	7.62102e-24	3.18704e-20	-2.21482e-19	-1.40713e-19	1.47106e-19	-8.86538e-19	-8.77969e-19	-6.78397e-19	1.90362e-18	1.66936e-17	8.18553e-18	-2.79619e-18	-8.39726e-18	-2.90929e-18	6.07249e-18	1.72054e-18	2.34003e-18	-1.60357e-18	-2.67885e-17	1.00973e-18	9.32505e-18	-2.46244e-17	-2.47342e-17	1.64404e-17	-3.34587e-18	-7.023e-18	-9.53981e-18	-2.83008e-17	1.92364e-17	4.98857e-16	4.33288e-16	-3.28718e-16	3.96986e-16	1.51073e-17
-1.98355e-30	-6.15794e-30	-3.80247e-30	2.30371e-29	-2.38133e-29	1.39339e-29	7.88976e-30	1.10966e-27	1.14015e-27	6.45082e-27	-2.45745e-27	1.44109e-25	5.58331e-25	-2.53255e-26	-7.24429e-26	5.19965e-24	1.15253e-24	4.81972e-21	-3.34944e-20	-2.12799e-20	2.22466e-20	-1.3407e-19	-1.32774e-19	-1.02593e-19	2.87882e-19	2.52455e-18	1.23789e-18	-4.22864e-19	-1.26991e-18	-4.39968e-19	9.18336e-19	2.60195e-19	3.5388e-19	-2.42507e-19	-4.05119e-18	1.527e-19	1.41022e-18	-3.72392e-18	-3.74052e-18	2.48626e-18	-5.05992e-19	-1.06208e-18	-1.44269e-18	-4.27989e-18	2.9091e-18	7.54415e-17	6.55256e-17	-4.97116e-17	6.00357e-17	2.28465e-18
-1.19838e-28	-3.71866e-28	-2.30149e-28	1.38874e-27	-1.43754e-27	8.38811e-28	4.73112e-28	6.69129e-26	6.87906e-26	3.89085e-25	-1.48201e-25	8.68939e-24	3.36673e-23	-1.5272e-24	-4.36823e-24	3.13537e-22	6.94995e-23	2.90629e-19	-2.01971e-18	-1.28318e-18	1.34147e-18	-8.08442e-18	-8.00628e-18	-6.18637e-18	1.73593e-17	1.52231e-16	7.46446e-17	-2.54987e-17	-7.65754e-17	-2.65301e-17	5.53756e-17	1.56898e-17	2.1339e-17	-1.46231e-17	-2.44287e-16	9.2078e-18	8.5036e-17	-2.24552e-16	-2.25553e-16	1.49921e-16	-3.05113e-17	-6.40434e-17	-8.69944e-17	-2.58077e-16	1.75419e-16	4.54912e-15	3.95119e-15	-2.99761e-15	3.62015e-15	1.37765e-16
-2.61321e-29	-8.10248e-29	-5.02555e-29	3.02714e-28	-3.13564e-28	1.82975e-28	1.03373e-28	1.45918e-26	1.49806e-26	8.48435e-26	-3.23274e-26	1.89493e-24	7.34212e-24	-3.33092e-25	-9.52605e-25	6.83747e-23	1.51559e-23	6.33793e-20	-4.40452e-19	-2.79831e-19	2.92543e-19	-1.76302e-18	-1.74598e-18	-1.3491e-18	3.78565e-18	3.31979e-17	1.62782e-17	-5.56067e-18	-1.66993e-17	-5.78558e-18	1.20761e-17	3.42157e-18	4.65353e-18	-3.18896e-18	-5.32732e-17	2.008e-18	1.85443e-17	-4.89695e-17	-4.91879e-17	3.26943e-17	-6.65379e-18	-1.39663e-17	-1.89714e-17	-5.62806e-17	3.82546e-17	9.92055e-16	8.61662e-16	-6.53708e-16	7.8947e-16	3.00432e-17
3.35565e-30	1.04128e-29	6.4085e-30	-3.89191e-29	4.02e-29	-2.36047e-29	-1.33107e-29	-1.87604e-27	-1.92517e-27	-1.09065e-26	4.1539e-27	-2.43626e-25	-9.4392e-25	4.27944e-26	1.22479e-25	-8.79069e-24	-1.94844e-24	-8.14834e-21	5.66265e-20	3.59763e-20	-3.76106e-20	2.26662e-19	2.24471e-19	1.73447e-19	-4.86701e-19	-4.26808e-18	-2.0928e-18	7.14905e-19	2.14694e-18	7.43821e-19	-1.55256e-18	-4.39893e-19	-5.98279e-19	4.09988e-19	6.84905e-18	-2.58158e-19	-2.38414e-18	6.29575e-18	6.32382e-18	-4.20333e-18	8.55442e-19	1.79558e-18	2.43905e-18	7.23569e-18	-4.91819e-18	-1.27543e-16	-1.10779e-16	8.40437e-17	-1.01498e-16	-3.86249e-18
1.69019e-31	2.46636e-31	6.71262e-31	1.9287e-30	-1.49343e-30	-2.52964e-31	8.54479e-31	-7.54696e-31	1.77651e-29	4.09312e-29	-1.11662e-28	-8.83589e-29	-2.85859e-28	-9.98794e-28	9.02958e-29	2.40917e-28	8.84914e-28	-3.21364e-26	-1.90988e-26	-1.28506e-26	2.01092e-26	-1.31487e-26	2.61501e-26	-1.70667e-26	-7.7482e-26	2.8764e-26	-2.82157e-26	1.46193e-25	-7.75765e-26	-1.10692e-25	-1.33821e-25	2.28263e-25	4.43897e-25	2.19669e-25	-2.04367e-25	-9.54416e-25	2.93739e-25	1.08658e-25	7.92707e-25	2.8548e-25	8.21404e-25	6.5225e-26	-4.79744e-25	1.62664e-25	-3.72897e-26	1.55696e-25	-1.47133e-24	-1.56544e-24	1.58114e-24	6.41204e-24
8.20443e-30	2.5519e-29	1.58127e-29	-9.53315e-29	9.86467e-29	-5.77798e-29	-3.26094e-29	-4.60148e-27	-4.72757e-27	-2.67569e-26	1.01839e-26	-5.97583e-25	-2.31531e-24	1.04981e-25	3.00409e-25	-2.15622e-23	-4.77936e-24	-1.99868e-20	1.38897e-19	8.82451e-20	-9.22538e-20	5.55972e-19	5.50598e-19	4.25441e-19	-1.19381e-18	-1.0469e-17	-5.13337e-18	1.75357e-18	5.26615e-18	1.82449e-18	-3.80822e-18	-1.079e-18	-1.4675e-18	1.00564e-18	1.67998e-17	-6.33227e-19	-5.84799e-18	1.54426e-17	1.55115e-17	-1.03102e-17	2.09828e-18	4.40431e-18	5.98267e-18	1.77482e-17	-1.20637e-17	-3.12846e-16	-2.71727e-16	2.06148e-16	-2.48961e-16	-9.47417e-18
-1.19838e-28	-3.71866e-28	-2.30149e-28	1.38874e-27	-1.43754e-27	8.38811e-28	4.73112e-28	6.69129e-26	6.87906e-26	3.89085e-25	-1.48201e-25	8.68939e-24	3.36673e-23	-1.5272e-24	-4.36823e-24	3.13537e-22	6.94995e-23	2.90629e-19	-2.01971e-18	-1.28318e-18	1.34147e-18	-8.08442e-18	-8.00628e-18	-6.18637e-18	1.73593e-17	1.52231e-16	7.46446e-17	-2.54987e-17	-7.65754e-17	-2.65301e-17	5.53756e-17	1.56898e-17	2.1339e-17	-1.46231e-17	-2.44287e-16	9.2078e-18	8.5036e-17	-2.24552e-16	-2.25553e-16	1.49921e-16	-3.05113e-17	-6.40434e-17	-8.69944e-17	-2.58077e-16	1.75419e-16	4.54912e-15	3.95119e-15	-2.99761e-15	3.62015e-15	1.37765e-16
1.23726e-29	3.84357e-29	2.38682e-29	-1.43844e-28	1.48925e-28	-8.69818e-29	-4.90146e-29	-6.92849e-27	-7.1256e-27	-4.02835e-26	1.53517e-26	-8.997e-25	-3.48607e-24	1.58113e-25	4.52317e-25	-3.24654e-23	-7.19612e-24	-3.00931e-20	2.09131e-19	1.32866e-19	-1.38902e-19	8.371e-19	8.29008e-19	6.40566e-19	-1.79746e-18	-1.57627e-17	-7.72906e-18	2.64026e-18	7.92898e-18	2.74705e-18	-5.73386e-18	-1.62459e-18	-2.20954e-18	1.51415e-18	2.52946e-17	-9.5342e-19	-8.80503e-18	2.32512e-17	2.33549e-17	-1.55236e-17	3.15928e-18	6.63136e-18	9.00781e-18	2.67226e-17	-1.81637e-17	-4.71038e-16	-4.09126e-16	3.10387e-16	-3.74848e-16	-1.42648e-17
-8.2304e-30	-2.55767e-29	-1.57462e-29	9.53785e-29	-9.86115e-29	5.77806e-29	3.25968e-29	4.60148e-27	4.72807e-27	2.67562e-26	-1.01852e-26	5.97585e-25	2.31531e-24	-1.04987e-25	-3.0041e-25	2.15622e-23	4.77935e-24	1.99868e-20	-1.38897e-19	-8.82451e-20	9.22538e-20	-5.55972e-19	-5.50598e-19	-4.25441e-19	1.19381e-18	1.0469e-17	5.13337e-18	-1.75357e-18	-5.26615e-18	-1.82449e-18	3.80822e-18	1.079e-18	1.4675e-18	-1.00564e-18	-1.67998e-17	6.33227e-19	5.84799e-18	-1.54426e-17	-1.55115e-17	1.03102e-17	-2.09828e-18	-4.40431e-18	-5.98267e-18	-1.77482e-17	1.20637e-17	3.12846e-16	2.71727e-16	-2.06148e-16	2.48961e-16	9.47417e-18
7.30906e-27	2.27035e-26	1.40275e-26	-8.48436e-26	8.772e-26	-5.12637e-26	-2.90055e-26	-4.08671e-24	-4.1976e-24	-2.3763e-23	9.05092e-24	-5.30773e-22	-2.05644e-21	9.32919e-23	2.66792e-22	-1.91513e-20	-4.24507e-21	-1.7752e-17	1.23367e-16	7.83781e-17	-8.19387e-17	4.93807e-16	4.89034e-16	3.77871e-16	-1.06033e-15	-9.29844e-15	-4.55939e-15	1.55749e-15	4.67732e-15	1.62049e-15	-3.38241e-15	-9.58351e-16	-1.30341e-15	8.932e-16	1.49214e-14	-5.62424e-16	-5.1941e-15	1.37159e-14	1.37771e-14	-9.15739e-15	1.86367e-15	3.91185e-15	5.31373e-15	1.57637e-14	-1.07148e-14	-2.77866e-13	-2.41344e-13	1.83098e-13	-2.21124e-13	-8.41483e-15
0.0162591	-0.278273	-0.0622253	0.00866262	-0.218629	0.398993	-0.154958	-0.0265183	-0.00465395	0.00188621	-0.0161232	0.00360565	-0.0255842	0.0188208	0.00221353	0.0184116	0.00168757	0.0108358	-0.0161856	-0.00805552	-0.0784228	0.0565509	-0.0141142	-0.0770881	-0.00297316	-0.0210218	-0.0565171	-0.344411	-0.18485	0.203404	-0.063336	-0.626755	-0.207319	-0.12022	0.02586	-0.0624341	0.0949099	-0.0028987	-0.00208004	0.00377102	-0.0334698	-0.0283167	-0.0184959	-0.0277661	-0.00950596	-0.0023518	0.0103869	-0.00236536	-0.00612208	0.000828824
-4.05168e-30	-1.25547e-29	-7.72148e-30	4.68275e-29	-4.84519e-29	2.83291e-29	1.5984e-29	2.25741e-27	2.3198e-27	1.31262e-26	-4.99806e-27	2.93168e-25	1.13585e-24	-5.15216e-26	-1.47371e-25	1.0578e-23	2.3447e-24	9.80512e-21	-6.81402e-20	-4.32913e-20	4.52579e-20	-2.72749e-19	-2.70112e-19	-2.08713e-19	5.8566e-19	5.13589e-18	2.51833e-18	-8.60265e-19	-2.58347e-18	-8.9506e-19	1.86824e-18	5.29335e-19	7.19926e-19	-4.93349e-19	-8.24165e-18	3.10649e-19	2.86891e-18	-7.57585e-18	-7.60962e-18	5.05798e-18	-1.02938e-18	-2.16067e-18	-2.93498e-18	-8.7069e-18	5.91819e-18	1.53476e-16	1.33304e-16	-1.01132e-16	1.22135e-16	4.64784e-18
2.14371e-29	6.65092e-29	4.09058e-29	-2.48697e-28	2.5699e-28	-1.50714e-28	-8.4966e-29	-1.19842e-26	-1.23267e-26	-6.96661e-26	2.65274e-26	-1.5564e-24	-6.02992e-24	2.73481e-25	7.82371e-25	-5.61561e-23	-1.24471e-23	-5.2053e-20	3.6174e-19	2.29823e-19	-2.40263e-19	1.44796e-18	1.43396e-18	1.10801e-18	-3.10913e-18	-2.72652e-17	-1.33692e-17	4.56694e-18	1.3715e-17	4.75166e-18	-9.91802e-18	-2.81011e-18	-3.82191e-18	2.61907e-18	4.37529e-17	-1.64916e-18	-1.52303e-17	4.02183e-17	4.03976e-17	-2.68516e-17	5.46471e-18	1.14705e-17	1.55811e-17	4.62228e-17	-3.14182e-17	-8.14768e-16	-7.07677e-16	5.36885e-16	-6.48386e-16	-2.46742e-17
-3.39004e-29	-1.05281e-28	-6.48008e-29	3.93949e-28	-4.06901e-28	2.39765e-28	1.35092e-28	1.90028e-26	1.95053e-26	1.10468e-25	-4.20608e-26	2.46783e-24	9.56126e-24	-4.33433e-25	-1.24059e-24	8.90451e-23	1.97361e-23	8.25377e-20	-5.73592e-19	-3.64418e-19	3.80973e-19	-2.29595e-18	-2.27376e-18	-1.75691e-18	4.92998e-18	4.3233e-17	2.11988e-17	-7.24155e-18	-2.17472e-17	-7.53446e-18	1.57265e-17	4.45584e-18	6.0602e-18	-4.15292e-18	-6.93767e-17	2.61499e-18	2.41499e-17	-6.37721e-17	-6.40564e-17	4.25772e-17	-8.66511e-18	-1.81881e-17	-2.47061e-17	-7.32931e-17	4.98183e-17	1.29194e-15	1.12213e-15	-8.51311e-16	1.02811e-15	3.91247e-17
-7.12049e-28	-2.21275e-27	-1.37124e-27	8.28382e-27	-8.56731e-27	5.0242e-27	2.83486e-27	3.99454e-25	4.10452e-25	2.32233e-24	-8.84573e-25	5.18787e-23	2.00998e-22	-9.11523e-24	-2.60795e-23	1.87186e-21	4.14902e-22	1.7351e-18	-1.2058e-17	-7.66076e-18	8.00877e-18	-4.82652e-17	-4.77987e-17	-3.69335e-17	1.03638e-16	9.0884e-16	4.4564e-16	-1.52231e-16	-4.57167e-16	-1.58389e-16	3.30601e-16	9.36703e-17	1.27397e-16	-8.73023e-17	-1.45843e-15	5.4972e-17	5.07677e-16	-1.34061e-15	-1.34659e-15	8.95053e-16	-1.82157e-16	-3.82349e-16	-5.19369e-16	-1.54076e-15	1.04727e-15	2.71589e-14	2.35892e-14	-1.78962e-14	2.16129e-14	8.22475e-16
-0.0036893	0.000207003	-0.00296865	0.0122702	-0.0142543	0.0061859	-0.00199577	0.228501	0.00130863	-0.000218258	-0.00032645	0.00053628	0.00105502	0.00159612	0.00127818	0.00217352	0.000202871	-0.0534842	-0.0893037	0.138326	-0.207181	0.094381	0.54768	0.185061	0.158068	0.692159	0.123754	-0.036121	-0.0802501	-0.0244621	0.0394508	-0.00126044	-0.0161884	0.00286433	-0.017753	-0.0143703	-0.00824825	-0.00367392	0.0165028	-0.00701416	-0.0105393	0.024651	-0.00428754	0.0106563	0.00425531	-0.000723969	-6.60173e-05	-0.000742158	-0.00116196	0.000587631
-0.00423996	0.0111261	0.0215142	-0.484737	0.369002	0.0166483	-0.197923	0.0470521	0.00295249	-0.00347059	-0.00766401	0.106904	0.126897	0.239206	0.0341178	0.00314008	-0.0142752	-0.000279629	-0.0075831	-0.0012524	-0.0147139	0.0123365	-0.00734501	-0.0212146	-0.00355345	0.00230798	-0.00522114	0.0532684	0.0210982	0.0590563	-0.0283	-0.0801286	-0.0323199	0.0998376	-0.0888006	-0.315994	0.0926814	0.0146625	0.249374	0.166363	0.457834	0.13704	-0.197453	-0.0134715	-0.00561896	0.00209323	-0.0106301	0.00351738	-0.00486604	-0.00134613
9.86739e-29	3.06398e-28	1.87896e-28	-1.14172e-27	1.17914e-27	-6.91157e-28	-3.91123e-28	-5.50346e-26	-5.64583e-26	-3.19997e-25	1.21844e-25	-7.14747e-24	-2.76931e-23	1.25575e-24	3.59306e-24	-2.57903e-22	-5.71652e-23	-2.39058e-19	1.66132e-18	1.05548e-18	-1.10343e-18	6.64987e-18	6.58559e-18	5.08862e-18	-1.4279e-17	-1.25218e-16	-6.13992e-17	2.09741e-17	6.29874e-17	2.18224e-17	-4.55494e-17	-1.29057e-17	-1.75525e-17	1.20283e-17	2.00939e-16	-7.57392e-18	-6.99467e-17	1.84706e-16	1.8553e-16	-1.23318e-16	2.50972e-17	5.26791e-17	7.15576e-17	2.12283e-16	-1.44291e-16	-3.7419e-15	-3.25007e-15	2.4657e-15	-2.97777e-15	-1.13319e-16
3.32495e-27	1.03356e-26	6.34629e-27	-3.863e-26	3.9886e-26	-2.34963e-26	-1.32546e-26	-1.86408e-24	-1.91271e-24	-1.08386e-23	4.12547e-24	-2.42094e-22	-9.37978e-22	4.25159e-23	1.21702e-22	-8.73546e-21	-1.93616e-21	-8.09713e-18	5.62707e-17	3.57502e-17	-3.73743e-17	2.25238e-16	2.2306e-16	1.72356e-16	-4.83642e-16	-4.24125e-15	-2.07965e-15	7.10412e-16	2.13344e-15	7.39147e-16	-1.5428e-15	-4.37128e-16	-5.94519e-16	4.07411e-16	6.806e-15	-2.56536e-16	-2.36916e-15	6.25618e-15	6.28408e-15	-4.17691e-15	8.50066e-16	1.78429e-15	2.42372e-15	7.19022e-15	-4.88728e-15	-1.26742e-13	-1.10083e-13	8.35155e-14	-1.0086e-13	-3.83822e-15
8.8425e-28	2.74727e-27	1.69901e-27	-1.02895e-26	1.06301e-26	-6.21941e-27	-3.51293e-27	-4.9529e-25	-5.09022e-25	-2.87961e-24	1.0972e-24	-6.43299e-23	-2.49238e-22	1.13045e-23	3.23368e-23	-2.32113e-21	-5.1449e-22	-2.15152e-18	1.49519e-17	9.49935e-18	-9.93088e-18	5.98489e-17	5.92704e-17	4.57976e-17	-1.28511e-16	-1.12696e-15	-5.52593e-16	1.88767e-16	5.66886e-16	1.96402e-16	-4.09945e-16	-1.16151e-16	-1.57972e-16	1.08255e-16	1.80845e-15	-6.81652e-17	-6.2952e-16	1.66236e-15	1.66977e-15	-1.10987e-15	2.25875e-16	4.74112e-16	6.44018e-16	1.91054e-15	-1.29862e-15	-3.36771e-14	-2.92506e-14	2.21913e-14	-2.67999e-14	-1.01987e-15
4.79897e-29	1.48798e-28	9.22886e-29	-5.56871e-28	5.76058e-28	-3.37333e-28	-1.90751e-28	-2.68546e-26	-2.757e-26	-1.56121e-25	5.94567e-26	-3.48738e-24	-1.35116e-23	6.12855e-25	1.75305e-24	-1.25831e-22	-2.78915e-23	-1.16637e-19	8.10565e-19	5.14974e-19	-5.38368e-19	3.24449e-18	3.21313e-18	2.48275e-18	-6.96675e-18	-6.10942e-17	-2.99569e-17	1.02333e-17	3.07317e-17	1.06472e-17	-2.22237e-17	-6.29673e-18	-8.56391e-18	5.86866e-18	9.80389e-17	-3.69534e-18	-3.41272e-17	9.01188e-17	9.05206e-17	-6.01674e-17	1.2245e-17	2.57023e-17	3.49132e-17	1.03573e-16	-7.04001e-17	-1.82568e-15	-1.58572e-15	1.20302e-15	-1.45286e-15	-5.52886e-17
9.00368e-30	2.79482e-29	1.73104e-29	-1.04571e-28	1.08128e-28	-6.32845e-29	-3.58067e-29	-5.03869e-27	-5.17072e-27	-2.92924e-26	1.11576e-26	-6.5431e-25	-2.53517e-24	1.14983e-25	3.28934e-25	-2.36098e-23	-5.23321e-24	-2.18845e-20	1.52086e-19	9.66241e-20	-1.01013e-19	6.08762e-19	6.02877e-19	4.65837e-19	-1.30717e-18	-1.14631e-17	-5.62078e-18	1.92007e-18	5.76617e-18	1.99773e-18	-4.16982e-18	-1.18145e-18	-1.60684e-18	1.10113e-18	1.83949e-17	-6.93353e-19	-6.40326e-18	1.69089e-17	1.69843e-17	-1.12892e-17	2.29752e-18	4.82251e-18	6.55073e-18	1.94334e-17	-1.32091e-17	-3.42551e-16	-2.97527e-16	2.25722e-16	-2.726e-16	-1.03737e-17
1.20217e-28	3.73628e-28	2.30413e-28	-1.39774e-27	1.44443e-27	-8.48997e-28	-4.79381e-28	-6.7412e-26	-6.91965e-26	-3.91897e-25	1.49199e-25	-8.75434e-24	-3.39181e-23	1.5377e-24	4.4008e-24	-3.1588e-22	-7.00139e-23	-2.92798e-19	2.03479e-18	1.29275e-18	-1.35148e-18	8.14475e-18	8.06603e-18	6.23253e-18	-1.74888e-17	-1.53367e-16	-7.52017e-17	2.5689e-17	7.71469e-17	2.67281e-17	-5.57889e-17	-1.58069e-17	-2.14982e-17	1.47323e-17	2.4611e-16	-9.27652e-18	-8.56706e-17	2.26228e-16	2.27237e-16	-1.5104e-16	3.0739e-17	6.45213e-17	8.76436e-17	2.60003e-16	-1.76728e-16	-4.58307e-15	-3.98068e-15	3.01998e-15	-3.64717e-15	-1.38793e-16
-4.73714e-06	-3.41527e-05	5.6767e-06	-1.39611e-05	8.65592e-06	-6.09347e-05	1.79053e-05	2.98584e-05	-0.000204041	0.000156592	5.28183e-05	-0.00736563	-0.0205417	0.0146707	-0.0267882	-0.353827	-0.0227779	-0.00232418	0.00926067	0.0344195	0.0333986	0.00185298	0.0607407	-0.119772	0.0247125	-0.0497811	0.157927	0.00835131	-0.0428225	-0.00720829	-0.0158436	-0.0126003	-0.0174626	0.00822207	0.0458699	0.0546144	-0.0160344	0.0898907	0.134781	-0.130599	0.0373593	0.00358065	0.0490067	-0.028254	-0.00915477	0.0268837	-0.0434762	-0.0182194	-0.0139474	-0.131334
1.84374e-28	5.7233e-28	3.55442e-28	-2.14377e-27	2.21844e-27	-1.29439e-27	-7.30886e-28	-1.03197e-25	-1.06159e-25	-5.99978e-25	2.28617e-25	-1.34015e-23	-5.19249e-23	2.35536e-24	6.73686e-24	-4.83563e-22	-1.07187e-22	-4.48234e-19	3.11498e-18	1.97903e-18	-2.06893e-18	1.24685e-17	1.2348e-17	9.54116e-18	-2.6773e-17	-2.34784e-16	-1.15124e-16	3.93264e-17	1.18101e-16	4.0917e-17	-8.54052e-17	-2.41982e-17	-3.29109e-17	2.25531e-17	3.76761e-16	-1.42011e-17	-1.3115e-16	3.46324e-16	3.47868e-16	-2.31222e-16	4.70572e-17	9.87734e-17	1.3417e-16	3.9803e-16	-2.70546e-16	-7.01606e-15	-6.09388e-15	4.62318e-15	-5.58332e-15	-2.12473e-16
4.41537e-34	-5.58118e-35	-9.23953e-34	1.23057e-33	4.00969e-33	6.39292e-33	3.66172e-33	-2.17898e-33	3.30281e-32	1.27432e-31	6.13585e-33	-1.01928e-30	1.44329e-30	8.35965e-31	1.78893e-31	-9.01797e-30	-8.66628e-30	-1.50267e-28	-3.80801e-29	5.51084e-29	8.21598e-29	-1.03542e-28	8.03498e-29	-1.93692e-28	9.70324e-29	-2.42464e-29	-1.00051e-28	-5.71589e-29	-4.92657e-28	2.94134e-28	5.95306e-29	-1.10709e-27	7.99767e-28	-6.08742e-28	6.73587e-28	1.54511e-27	-1.69125e-27	-1.19872e-27	1.75691e-28	-2.25798e-28	8.88654e-28	-9.87084e-28	-6.86728e-29	-1.77478e-28	-9.59882e-29	-8.20853e-27	1.65715e-26	3.58785e-27	-6.76484e-27	-2.2113e-27
3.27279e-30	1.01575e-29	6.2692e-30	-3.79792e-29	3.92469e-29	-2.30254e-29	-1.29918e-29	-1.83093e-27	-1.87908e-27	-1.0645e-26	4.05452e-27	-2.37785e-25	-9.21241e-25	4.17798e-26	1.19526e-25	-8.57939e-24	-1.90164e-24	-7.95254e-21	5.52658e-20	3.51118e-20	-3.67069e-20	2.21216e-19	2.19077e-19	1.69279e-19	-4.75006e-19	-4.16552e-18	-2.04251e-18	6.97726e-19	2.09535e-18	7.25948e-19	-1.51525e-18	-4.29322e-19	-5.83903e-19	4.00136e-19	6.68447e-18	-2.51955e-19	-2.32685e-18	6.14447e-18	6.17186e-18	-4.10233e-18	8.34886e-19	1.75243e-18	2.38044e-18	7.06182e-18	-4.80001e-18	-1.24478e-16	-1.08117e-16	8.20242e-17	-9.90589e-17	-3.76968e-18
-4.1366e-29	-1.28259e-28	-7.9175e-29	4.79853e-28	-4.95918e-28	2.91831e-28	1.64921e-28	2.31647e-26	2.3754e-26	1.34664e-25	-5.1249e-26	3.00814e-24	1.16551e-23	-5.28411e-25	-1.51219e-24	1.08544e-22	2.40581e-23	1.00612e-19	-6.99196e-19	-4.44218e-19	4.64398e-19	-2.79871e-18	-2.77166e-18	-2.14163e-18	6.00954e-18	5.27001e-17	2.58409e-17	-8.8273e-18	-2.65093e-17	-9.18434e-18	1.91703e-17	5.43158e-18	7.38725e-18	-5.06232e-18	-8.45687e-17	3.18761e-18	2.94382e-17	-7.77368e-17	-7.80834e-17	5.19006e-17	-1.05626e-17	-2.21709e-17	-3.01162e-17	-8.93427e-17	6.07274e-17	1.57484e-15	1.36785e-15	-1.03773e-15	1.25325e-15	4.76921e-17
-2.58668e-30	-8.02085e-30	-4.95422e-30	3.00333e-29	-3.10492e-29	1.82258e-29	1.02702e-29	1.44862e-27	1.48841e-27	8.42222e-27	-3.20481e-27	1.88125e-25	7.28878e-25	-3.30559e-26	-9.45667e-26	6.78797e-24	1.50459e-24	6.292e-21	-4.37259e-20	-2.77802e-20	2.90422e-20	-1.75024e-19	-1.73332e-19	-1.33932e-19	3.75821e-19	3.29573e-18	1.61602e-18	-5.52036e-19	-1.65782e-18	-5.74365e-19	1.19886e-18	3.39677e-19	4.6198e-19	-3.16585e-19	-5.28871e-18	1.99345e-19	1.84099e-18	-4.86146e-18	-4.88313e-18	3.24573e-18	-6.60556e-19	-1.38651e-18	-1.88339e-18	-5.58726e-18	3.79773e-18	9.84865e-17	8.55416e-17	-6.4897e-17	7.83748e-17	2.98254e-18
3.27925e-30	1.01718e-29	6.25239e-30	-3.79916e-29	3.92448e-29	-2.30158e-29	-1.29953e-29	-1.83093e-27	-1.87907e-27	-1.06449e-26	4.05422e-27	-2.37787e-25	-9.21243e-25	4.1777e-26	1.19525e-25	-8.57939e-24	-1.90163e-24	-7.95254e-21	5.52658e-20	3.51118e-20	-3.67069e-20	2.21216e-19	2.19077e-19	1.69279e-19	-4.75006e-19	-4.16552e-18	-2.04251e-18	6.97726e-19	2.09535e-18	7.25948e-19	-1.51525e-18	-4.29322e-19	-5.83903e-19	4.00136e-19	6.68447e-18	-2.51955e-19	-2.32685e-18	6.14447e-18	6.17186e-18	-4.10233e-18	8.34886e-19	1.75243e-18	2.38044e-18	7.06182e-18	-4.80001e-18	-1.24478e-16	-1.08117e-16	8.20242e-17	-9.9059e-17	-3.76968e-18
0.00385089	-0.317789	-0.0563265	-0.018023	0.0420607	-0.0795923	0.0259767	0.0055322	-0.00233599	-0.00105414	-0.043272	-0.00059791	0.0089229	-0.00681383	0.00264756	0.0394297	0.00242973	0.0142221	-0.0264845	0.00846464	-0.149227	0.124597	-0.0142821	-0.18966	-0.0224841	-0.0176297	-0.0589866	-0.177514	-0.173549	0.326473	0.262459	0.212237	0.126321	0.0116747	-0.042975	0.0398827	-0.56811	0.143215	-0.236052	-0.130676	0.266433	0.0167438	-0.080346	0.0804187	-0.037423	0.000931772	-0.0159305	0.000994672	0.00239303	0.00597673
-7.49263e-34	-6.91297e-35	-1.2991e-34	-8.28862e-35	1.87495e-33	-3.58192e-33	1.29033e-33	-1.36871e-33	-1.98148e-32	-1.22952e-31	4.53566e-32	-9.40766e-31	5.75889e-31	5.48718e-31	1.84609e-30	-1.88031e-30	-5.39292e-30	3.07196e-29	-2.24241e-29	-4.78576e-29	-6.17887e-29	-2.03738e-29	-1.6689e-29	-3.29912e-29	8.5548e-29	-2.55232e-29	-8.44901e-29	1.10593e-29	5.5204e-29	-8.09855e-29	1.70763e-28	3.30885e-28	2.38628e-28	3.20557e-28	3.93406e-28	2.68485e-28	-3.48669e-28	-5.77118e-28	1.91281e-28	-2.08857e-28	1.00401e-28	-1.97521e-28	9.27027e-29	-5.37052e-29	2.3797e-27	-8.37997e-28	-2.79426e-27	-3.80048e-27	-4.67269e-27	2.51025e-27
0.000743303	-0.00406438	0.0254784	0.0399981	0.393806	0.444367	0.241648	0.0128265	0.00208493	0.00186356	0.00665301	-0.107166	-0.127153	-0.239407	-0.033935	-0.00346366	0.014439	-0.00484601	0.0086747	-0.00184225	0.017904	-0.0135176	0.00126626	0.0178026	-0.00287044	-0.0181584	-0.00210268	-0.0477893	0.0149448	-0.0411481	0.0222783	0.0702284	-0.0052482	0.058714	-0.18648	-0.330236	-0.262206	-0.34863	0.233504	-0.16334	-0.143145	-0.172924	0.141113	-0.00231398	0.00119499	-0.00390394	2.72448e-05	0.00230836	0.00980207	-0.0056964
-1.07102e-33	-2.1015e-33	-2.88424e-34	-2.42696e-33	2.35936e-33	-6.9096e-33	4.90737e-33	1.20946e-33	-2.4295e-32	3.7521e-32	5.76952e-32	-1.37267e-30	1.27232e-31	-1.3476e-30	-7.08957e-31	8.76092e-31	1.03702e-30	-2.81598e-29	-5.52872e-29	7.84589e-29	2.55901e-29	7.65345e-29	1.98457e-29	-1.12681e-28	1.31272e-28	3.16824e-29	-1.48626e-28	2.84726e-28	2.64348e-29	3.08334e-28	8.67177e-28	2.60238e-28	1.82362e-28	3.12688e-28	-5.5287e-28	-1.61491e-27	-2.94173e-28	-6.44431e-28	6.40949e-28	-4.61202e-28	-8.37341e-28	-6.54961e-28	5.6726e-28	-1.5323e-28	5.60408e-28	2.96539e-27	-7.24779e-27	-1.49578e-27	3.66213e-28	8.58372e-28
-1.53053e-33	-1.75089e-34	-3.27336e-34	-3.59252e-34	3.93278e-33	-7.2078e-33	2.51695e-33	-2.68891e-33	-3.67414e-32	-2.52468e-31	1.01271e-31	-1.9231e-30	1.12587e-30	1.10892e-30	3.76733e-30	-3.87859e-30	-1.09624e-29	6.08533e-29	-4.45223e-29	-9.5582e-29	-1.23535e-28	-4.1644e-29	-3.44656e-29	-6.36898e-29	1.70042e-28	-5.18939e-29	-1.66464e-28	3.68701e-29	9.43934e-29	-1.76423e-28	3.44929e-28	6.67959e-28	4.77676e-28	6.59625e-28	8.07171e-28	5.423e-28	-7.18644e-28	-1.17569e-27	3.74458e-28	-4.49206e-28	1.947e-28	-3.99984e-28	1.98588e-28	-1.2728e-28	4.87814e-27	-1.6205e-27	-5.78304e-27	-7.87751e-27	-9.43732e-27	4.11195e-27
-7.13702e-28	-2.21632e-27	-1.36677e-27	8.2868e-27	-8.56667e-27	5.02227e-27	2.83529e-27	3.99454e-25	4.10538e-25	2.32247e-24	-8.84483e-25	5.1878e-23	2.00997e-22	-9.11498e-24	-2.60791e-23	1.87187e-21	4.14904e-22	1.7351e-18	-1.2058e-17	-7.66076e-18	8.00877e-18	-4.82652e-17	-4.77987e-17	-3.69335e-17	1.03638e-16	9.0884e-16	4.4564e-16	-1.52231e-16	-4.57167e-16	-1.58389e-16	3.30601e-16	9.36703e-17	1.27397e-16	-8.73023e-17	-1.45843e-15	5.4972e-17	5.07677e-16	-1.34061e-15	-1.34659e-15	8.95053e-16	-1.82157e-16	-3.82349e-16	-5.19369e-16	-1.54076e-15	1.04727e-15	2.71589e-14	2.35892e-14	-1.78962e-14	2.16129e-14	8.22475e-16
-8.62245e-34	4.43877e-35	-3.29717e-34	-1.64805e-35	1.98788e-33	-3.47279e-33	4.33662e-34	-1.75128e-33	-1.47801e-32	-1.40635e-31	5.9451e-32	-8.88894e-31	6.49995e-31	5.19707e-31	1.84352e-30	-2.03092e-30	-5.11261e-30	3.08066e-29	-1.69396e-29	-4.29604e-29	-7.13191e-29	-3.86017e-29	-1.98603e-29	-3.26032e-29	8.83686e-29	-3.3886e-29	-9.05331e-29	4.06659e-29	3.49055e-29	-9.11673e-29	1.91359e-28	3.45559e-28	2.39033e-28	2.86684e-28	4.08836e-28	2.88873e-28	-4.47502e-28	-6.06483e-28	1.54495e-28	-2.29184e-28	1.17632e-28	-2.98837e-28	9.78895e-29	-4.06436e-29	3.02217e-27	-4.37405e-31	-3.11124e-27	-4.18597e-27	-5.16722e-27	3.38173e-27
3.35565e-30	1.04128e-29	6.4085e-30	-3.89191e-29	4.02e-29	-2.36047e-29	-1.33107e-29	-1.87604e-27	-1.92517e-27	-1.09065e-26	4.1539e-27	-2.43626e-25	-9.4392e-25	4.27944e-26	1.22479e-25	-8.79069e-24	-1.94844e-24	-8.14834e-21	5.66265e-20	3.59763e-20	-3.76106e-20	2.26662e-19	2.24471e-19	1.73447e-19	-4.86701e-19	-4.26808e-18	-2.0928e-18	7.14905e-19	2.14694e-18	7.43821e-19	-1.55256e-18	-4.39893e-19	-5.98279e-19	4.09988e-19	6.84905e-18	-2.58158e-19	-2.38414e-18	6.29575e-18	6.32382e-18	-4.20333e-18	8.55442e-19	1.79558e-18	2.43905e-18	7.23569e-18	-4.91819e-18	-1.27543e-16	-1.10779e-16	8.40437e-17	-1.01498e-16	-3.86249e-18
4.04509e-30	1.25401e-29	7.73753e-30	-4.68147e-29	4.84588e-29	-2.833e-29	-1.59847e-29	-2.25741e-27	-2.31957e-27	-1.31258e-26	4.99808e-27	-2.93166e-25	-1.13585e-24	5.15206e-26	1.47374e-25	-1.0578e-23	-2.34471e-24	-9.80512e-21	6.81402e-20	4.32913e-20	-4.52579e-20	2.72749e-19	2.70112e-19	2.08713e-19	-5.8566e-19	-5.13589e-18	-2.51833e-18	8.60265e-19	2.58347e-18	8.9506e-19	-1.86824e-18	-5.29335e-19	-7.19925e-19	4.93349e-19	8.24165e-18	-3.10649e-19	-2.86891e-18	7.57585e-18	7.60962e-18	-5.05798e-18	1.02938e-18	2.16067e-18	2.93498e-18	8.7069e-18	-5.91819e-18	-1.53476e-16	-1.33304e-16	1.01132e-16	-1.22135e-16	-4.64784e-18
-1.69244e-32	-5.2508e-32	-3.24744e-32	1.96511e-31	-2.0316e-31	1.19389e-31	6.74213e-32	9.48225e-30	9.72569e-30	5.51222e-29	-2.09833e-29	1.23142e-27	4.77084e-27	-2.16345e-28	-6.19001e-28	4.44307e-26	9.84797e-27	4.11841e-23	-2.86207e-22	-1.81835e-22	1.90095e-22	-1.14562e-21	-1.13454e-21	-8.7665e-22	2.45993e-21	2.15721e-20	1.05777e-20	-3.61334e-21	-1.08513e-20	-3.75949e-21	7.84711e-21	2.22335e-21	3.02388e-21	-2.0722e-21	-3.46171e-20	1.30481e-21	1.20502e-20	-3.18206e-20	-3.19625e-20	2.12449e-20	-4.32366e-21	-9.07539e-21	-1.23277e-20	-3.65713e-20	2.4858e-20	6.44641e-19	5.59911e-19	-4.24782e-19	5.13001e-19	1.95222e-20
-5.08673e-30	-1.5786e-29	-9.7392e-30	5.9002e-29	-6.0984e-29	3.56275e-29	2.01457e-29	2.8401e-27	2.91755e-27	1.65115e-26	-6.29047e-27	3.6881e-25	1.42898e-24	-6.48153e-26	-1.854e-25	1.33079e-23	2.94981e-24	1.23355e-20	-8.57248e-20	-5.44632e-20	5.69374e-20	-3.43136e-19	-3.39819e-19	-2.62574e-19	7.36798e-19	6.46128e-18	3.16822e-18	-1.08227e-18	-3.25017e-18	-1.12604e-18	2.35037e-18	6.65937e-19	9.05713e-19	-6.20665e-19	-1.03685e-17	3.90816e-19	3.60927e-18	-9.5309e-18	-9.5734e-18	6.36327e-18	-1.29502e-18	-2.71826e-18	-3.69239e-18	-1.09538e-17	7.44547e-18	1.93083e-16	1.67705e-16	-1.27231e-16	1.53654e-16	5.84728e-18
-2.56873e-30	1.11163e-30	-9.44851e-30	2.32275e-29	-1.62496e-29	1.23117e-30	7.65076e-30	-1.79664e-29	2.86591e-28	2.85152e-28	-1.03498e-27	5.5452e-27	2.83671e-27	1.0712e-27	-4.07317e-27	-2.24005e-26	-2.56876e-26	1.23535e-25	1.42386e-25	6.48098e-25	-8.03203e-25	5.85222e-26	-5.47018e-25	-4.21095e-25	6.5692e-25	-3.43021e-25	-1.12623e-24	4.73466e-25	-7.41293e-25	-7.16336e-25	1.66976e-24	-2.46878e-24	3.15252e-24	1.44314e-25	1.89622e-24	1.01829e-24	-1.20216e-24	-2.57434e-24	3.07227e-24	1.935e-24	4.99401e-24	-2.31018e-24	-1.95239e-24	1.00488e-24	2.27029e-23	1.69015e-23	-1.26156e-24	-1.92726e-23	-5.02403e-23	2.30455e-23
8.09322e-37	-2.94841e-35	-2.21554e-35	-1.08524e-35	1.01793e-34	-1.72673e-34	5.15753e-35	-1.30214e-35	-8.42083e-34	2.94782e-34	1.68858e-33	1.55316e-32	-1.47074e-32	-6.71909e-32	4.30036e-34	5.68534e-32	1.5075e-31	-1.50517e-30	-7.92689e-31	-6.741e-31	-1.7944e-30	9.21606e-31	1.78554e-30	-3.29837e-30	-1.02647e-29	-4.70853e-31	2.59259e-30	-8.45474e-31	-5.51059e-31	-1.16519e-29	4.10451e-30	-1.69574e-29	-1.08774e-29	-3.8931e-30	4.46292e-30	3.13057e-29	-9.12823e-29	2.36712e-29	-5.53011e-29	1.97287e-29	5.41113e-29	7.78189e-30	-3.71747e-29	1.1905e-29	-1.2697e-29	6.01203e-29	1.24918e-28	9.79711e-29	4.41616e-30	1.88169e-28
0.00115329	0.0213172	0.0166041	0.0121459	0.0525236	-9.08691e-05	-0.805939	-0.00422049	-0.00728811	0.000589082	0.00998028	-0.0122334	0.0853672	-0.0637974	-0.00402791	-0.0161306	-0.00342785	-0.00416241	0.0107858	0.000172777	0.0311904	-0.0239688	0.00636642	0.0386648	-0.0039184	-0.0114128	-0.0024884	-0.107728	-0.0256885	-0.0813911	0.0211988	0.122267	0.0373527	0.0522437	0.0286942	0.27803	-0.19019	-0.390165	0.106819	-0.0186581	-0.0909658	-0.0477387	0.051588	-0.0351155	-0.00913201	-0.00355852	-0.00287902	-0.000900824	0.0104398	0.00407924
1.2342e-05	8.48931e-06	7.14384e-05	-2.15751e-05	-2.6265e-05	-0.000123901	-0.000283853	0.000515764	0.000200895	0.00240101	0.00284677	0.0676576	-0.493546	0.369151	0.0189947	0.0376663	0.0181303	-0.0014484	0.00310759	-0.00107808	0.00555404	-0.00267739	0.000817036	0.00884627	0.000397522	-0.00666139	-0.00117291	-0.0206551	-0.0128407	-0.0132832	0.00242228	0.0460674	-0.00245714	-0.00880437	-0.0471546	0.0773938	-0.0571413	-0.0318086	0.0854509	-0.0299134	-0.127822	-0.0681314	-0.25254	-0.0688472	-0.0155572	-0.00683679	0.00833698	-0.00613405	-0.00155092	0.00131679
3.27925e-30	1.01718e-29	6.25239e-30	-3.79916e-29	3.92448e-29	-2.30158e-29	-1.29953e-29	-1.83093e-27	-1.87907e-27	-1.06449e-26	4.05422e-27	-2.37787e-25	-9.21243e-25	4.1777e-26	1.19525e-25	-8.57939e-24	-1.90163e-24	-7.95254e-21	5.52658e-20	3.51118e-20	-3.67069e-20	2.21216e-19	2.19077e-19	1.69279e-19	-4.75006e-19	-4.16552e-18	-2.04251e-18	6.97726e-19	2.09535e-18	7.25948e-19	-1.51525e-18	-4.29322e-19	-5.83903e-19	4.00136e-19	6.68447e-18	-2.51955e-19	-2.32685e-18	6.14447e-18	6.17186e-18	-4.10233e-18	8.34886e-19	1.75243e-18	2.38044e-18	7.06182e-18	-4.80001e-18	-1.24478e-16	-1.08117e-16	8.20242e-17	-9.9059e-17	-3.76968e-18
-5.29307e-10	-2.04275e-09	-4.74409e-10	-7.83086e-10	-3.36301e-09	1.10497e-08	-4.47454e-09	1.84711e-08	-1.94598e-08	-8.65067e-08	-8.03997e-08	-2.4931e-06	-1.00845e-06	-3.8356e-06	6.59372e-07	-3.1647e-06	-2.52547e-07	3.99399e-05	7.50139e-06	-6.67006e-05	0.000104325	4.19733e-05	-9.25632e-05	-7.35113e-05	9.88463e-05	-0.000192503	0.000843191	-4.679e-05	-0.000104692	0.000212096	0.00128316	-0.000864454	0.000267114	-0.000414867	-0.00193825	0.00112177	-0.00142908	0.00124181	-0.000909585	0.00103798	-0.00184129	0.00176	0.000404838	-0.00194135	0.00953458	0.00197898	-0.00614486	0.00531196	-0.0197528	0.00365071
4.20178e-36	-1.41837e-35	-1.91033e-35	-1.42975e-36	6.50198e-36	-3.13953e-35	1.48136e-35	-8.99733e-36	8.49993e-34	2.79928e-34	3.35688e-34	1.36504e-32	-2.13437e-32	9.17013e-33	-5.63568e-33	6.15672e-32	1.43983e-33	5.07285e-31	1.11456e-31	3.37509e-31	-9.69833e-32	-2.2824e-32	4.43195e-31	-1.18162e-30	1.29104e-30	-3.4832e-32	-1.80109e-30	1.84851e-31	-1.58403e-30	-4.98003e-30	-3.7098e-30	-1.28642e-29	-1.90963e-30	-6.96525e-30	4.67055e-30	2.24786e-29	6.13639e-30	-5.67983e-30	-4.93365e-30	3.75268e-30	-1.54196e-29	1.05392e-29	3.16794e-29	-2.21864e-31	-2.7569e-30	1.40794e-29	-1.66163e-29	3.26419e-31	1.74725e-30	-8.13424e-29
-5.01207e-29	-1.55731e-28	-9.65776e-29	5.81767e-28	-6.02092e-28	3.52573e-28	1.99066e-28	2.8073e-26	2.88277e-26	1.63227e-25	-6.21371e-26	3.64571e-24	1.41257e-23	-6.40534e-25	-1.83278e-24	1.31551e-22	2.91587e-23	1.21939e-19	-8.47409e-19	-5.38382e-19	5.62839e-19	-3.39197e-18	-3.35918e-18	-2.59561e-18	7.28342e-18	6.38712e-17	3.13186e-17	-1.06985e-17	-3.21286e-17	-1.11312e-17	2.32339e-17	6.58294e-18	8.95317e-18	-6.13541e-18	-1.02495e-16	3.86331e-18	3.56784e-17	-9.42151e-17	-9.46352e-17	6.29023e-17	-1.28016e-17	-2.68706e-17	-3.65001e-17	-1.08281e-16	7.36001e-17	1.90867e-15	1.6578e-15	-1.2577e-15	1.5189e-15	5.78017e-17
3.47085e-29	1.07879e-28	6.69946e-29	-4.03992e-28	4.17772e-28	-2.44721e-28	-1.3852e-28	-1.94746e-26	-1.99901e-26	-1.1321e-25	4.31214e-26	-2.52898e-24	-9.79866e-24	4.44337e-25	1.27139e-24	-9.12544e-23	-2.02269e-23	-8.45861e-20	5.87827e-19	3.73462e-19	-3.90428e-19	2.35293e-18	2.33019e-18	1.80051e-18	-5.05233e-18	-4.43059e-17	-2.17249e-17	7.42127e-18	2.22869e-17	7.72144e-18	-1.61168e-17	-4.56643e-18	-6.2106e-18	4.25599e-18	7.10984e-17	-2.67988e-18	-2.47493e-17	6.53548e-17	6.56461e-17	-4.36338e-17	8.88015e-18	1.86395e-17	2.53193e-17	7.51121e-17	-5.10546e-17	-1.324e-15	-1.14997e-15	8.72439e-16	-1.05363e-15	-4.00957e-17
-4.12626e-29	-1.28044e-28	-7.94662e-29	4.7969e-28	-4.96024e-28	2.91855e-28	1.64943e-28	2.31647e-26	2.37537e-26	1.3466e-25	-5.12497e-26	3.00815e-24	1.16551e-23	-5.28391e-25	-1.51221e-24	1.08544e-22	2.4058e-23	1.00612e-19	-6.99196e-19	-4.44218e-19	4.64398e-19	-2.79871e-18	-2.77166e-18	-2.14163e-18	6.00954e-18	5.27001e-17	2.58409e-17	-8.8273e-18	-2.65093e-17	-9.18434e-18	1.91703e-17	5.43158e-18	7.38725e-18	-5.06232e-18	-8.45687e-17	3.18761e-18	2.94382e-17	-7.77368e-17	-7.80834e-17	5.19006e-17	-1.05626e-17	-2.21709e-17	-3.01162e-17	-8.93427e-17	6.07274e-17	1.57484e-15	1.36785e-15	-1.03773e-15	1.25325e-15	4.76921e-17
1.69024e-31	2.46644e-31	6.71261e-31	1.9287e-30	-1.49336e-30	-2.52903e-31	8.54552e-31	-7.54776e-31	1.77647e-29	4.09316e-29	-1.11661e-28	-8.83791e-29	-2.85866e-28	-9.98773e-28	9.03312e-29	2.40846e-28	8.84976e-28	-3.21362e-26	-1.91002e-26	-1.2851e-26	2.01108e-26	-1.31467e-26	2.61486e-26	-1.70665e-26	-7.74821e-26	2.87581e-26	-2.82154e-26	1.46199e-25	-7.75828e-26	-1.10695e-25	-1.33825e-25	2.28265e-25	4.43893e-25	2.19661e-25	-2.04356e-25	-9.54404e-25	2.93737e-25	1.0864e-25	7.92711e-25	2.85475e-25	8.21408e-25	6.51789e-26	-4.79726e-25	1.6264e-25	-3.73109e-26	1.55887e-25	-1.47152e-24	-1.56521e-24	1.58099e-24	6.41248e-24
-1.74769e-33	-4.70568e-33	-1.68737e-32	7.8262e-33	-4.55037e-32	2.28389e-32	-3.29324e-32	-2.88257e-32	-3.15681e-32	1.47377e-30	-2.68801e-30	7.44039e-31	-1.05826e-30	1.62023e-29	1.12538e-30	3.33569e-29	-3.39079e-29	-2.57652e-28	2.63686e-29	2.08605e-28	-8.93439e-28	-6.86579e-28	-7.6963e-28	-4.63493e-28	-2.22386e-27	-3.97961e-28	2.02044e-27	1.57092e-27	1.25405e-27	-4.78486e-27	1.4997e-27	-2.08265e-27	-1.35163e-27	4.16758e-27	1.4682e-26	1.06261e-27	-2.2981e-27	1.59917e-26	-2.74051e-26	-7.72068e-27	3.70381e-27	-2.68691e-26	-5.10925e-27	-2.49582e-27	-9.38972e-27	-3.50467e-26	3.14071e-26	3.06116e-26	-2.61542e-26	7.54926e-26
-1.02721e-29	-3.19019e-29	-1.97189e-29	1.19355e-28	-1.23381e-28	7.23799e-29	4.08914e-29	5.75621e-27	5.90816e-27	3.34669e-26	-1.27421e-26	7.47564e-25	2.8963e-24	-1.31345e-25	-3.75791e-25	2.69731e-23	5.97869e-24	2.50023e-20	-1.73752e-19	-1.10389e-19	1.15404e-19	-6.95488e-19	-6.88766e-19	-5.32202e-19	1.49339e-18	1.30961e-17	6.42154e-18	-2.19361e-18	-6.58764e-18	-2.28234e-18	4.76387e-18	1.34976e-18	1.83575e-18	-1.258e-18	-2.10156e-17	7.92131e-19	7.31549e-18	-1.93178e-17	-1.9404e-17	1.28975e-17	-2.62483e-18	-5.50954e-18	-7.48397e-18	-2.22019e-17	1.50909e-17	3.91353e-16	3.39914e-16	-2.57879e-16	3.11435e-16	1.18516e-17
3.40043e-29	1.05498e-28	6.45132e-29	-3.94122e-28	4.06777e-28	-2.39818e-28	-1.35035e-28	-1.90028e-26	-1.95095e-26	-1.10473e-25	4.20636e-26	-2.46784e-24	-9.56125e-24	4.33429e-25	1.24058e-24	-8.90448e-23	-1.97361e-23	-8.25377e-20	5.73592e-19	3.64418e-19	-3.80973e-19	2.29595e-18	2.27376e-18	1.75691e-18	-4.92998e-18	-4.3233e-17	-2.11988e-17	7.24155e-18	2.17472e-17	7.53446e-18	-1.57265e-17	-4.45584e-18	-6.0602e-18	4.15292e-18	6.93767e-17	-2.61499e-18	-2.41499e-17	6.37721e-17	6.40564e-17	-4.25772e-17	8.66511e-18	1.81881e-17	2.47061e-17	7.32931e-17	-4.98183e-17	-1.29194e-15	-1.12213e-15	8.51311e-16	-1.02811e-15	-3.91247e-17
-1.23726e-29	-3.84357e-29	-2.38682e-29	1.43844e-28	-1.48925e-28	8.69818e-29	4.90146e-29	6.92849e-27	7.1256e-27	4.02835e-26	-1.53517e-26	8.997e-25	3.48607e-24	-1.58113e-25	-4.52317e-25	3.24654e-23	7.19612e-24	3.00931e-20	-2.09131e-19	-1.32866e-19	1.38902e-19	-8.371e-19	-8.29008e-19	-6.40566e-19	1.79746e-18	1.57627e-17	7.72906e-18	-2.64026e-18	-7.92898e-18	-2.74705e-18	5.73386e-18	1.62459e-18	2.20954e-18	-1.51415e-18	-2.52946e-17	9.5342e-19	8.80503e-18	-2.32512e-17	-2.33549e-17	1.55236e-17	-3.15928e-18	-6.63136e-18	-9.00781e-18	-2.67226e-17	1.81637e-17	4.71038e-16	4.09126e-16	-3.10387e-16	3.74848e-16	1.42648e-17
3.06338e-30	9.508e-30	5.85052e-30	-3.55226e-29	3.67015e-29	-2.1543e-29	-1.21762e-29	-1.7129e-27	-1.75825e-27	-9.9586e-27	3.79164e-27	-2.2247e-25	-8.61914e-25	3.90871e-26	1.11833e-25	-8.02691e-24	-1.77919e-24	-7.44044e-21	5.1707e-20	3.28508e-20	-3.43432e-20	2.06971e-19	2.0497e-19	1.58378e-19	-4.44418e-19	-3.89728e-18	-1.91099e-18	6.52797e-19	1.96042e-18	6.79201e-19	-1.41768e-18	-4.01676e-19	-5.46303e-19	3.74369e-19	6.25403e-18	-2.3573e-19	-2.17702e-18	5.7488e-18	5.77443e-18	-3.83816e-18	7.81125e-19	1.63959e-18	2.22716e-18	6.60708e-18	-4.49092e-18	-1.16463e-16	-1.01155e-16	7.67423e-17	-9.26802e-17	-3.52693e-18
3.85143e-29	1.19553e-28	7.38994e-29	-4.46993e-28	4.62367e-28	-2.70744e-28	-1.52647e-28	-2.15546e-26	-2.21445e-26	-1.25322e-25	4.7706e-26	-2.79926e-24	-1.08455e-23	4.91875e-25	1.40716e-24	-1.01003e-22	-2.23879e-23	-9.36231e-20	6.50629e-19	4.13362e-19	-4.3214e-19	2.60431e-18	2.57914e-18	1.99287e-18	-5.59211e-18	-4.90395e-17	-2.4046e-17	8.21414e-18	2.46679e-17	8.54638e-18	-1.78387e-17	-5.05429e-18	-6.87413e-18	4.71069e-18	7.86944e-17	-2.9662e-18	-2.73934e-17	7.23371e-17	7.26596e-17	-4.82956e-17	9.82889e-18	2.06309e-17	2.80243e-17	8.31369e-17	-5.65092e-17	-1.46545e-15	-1.27284e-15	9.65648e-16	-1.16619e-15	-4.43794e-17
-5.7455e-29	-1.78008e-28	-1.09273e-28	6.65999e-28	-6.87703e-28	4.03829e-28	2.27145e-28	3.20716e-26	3.29837e-26	1.86439e-25	-7.10124e-26	4.1647e-24	1.61356e-23	-7.3175e-25	-2.09354e-24	1.5027e-22	3.33075e-23	1.3929e-19	-9.67989e-19	-6.14989e-19	6.42927e-19	-3.87462e-18	-3.83717e-18	-2.96494e-18	8.31979e-18	7.29596e-17	3.5775e-17	-1.22208e-17	-3.67003e-17	-1.27151e-17	2.65399e-17	7.51964e-18	1.02271e-17	-7.00844e-18	-1.17079e-16	4.41303e-18	4.07552e-17	-1.07621e-16	-1.08101e-16	7.18529e-17	-1.46232e-17	-3.06941e-17	-4.16938e-17	-1.23689e-16	8.40729e-17	2.18026e-15	1.89369e-15	-1.43667e-15	1.73503e-15	6.60265e-17
1.549e-27	4.80712e-27	2.95593e-27	-1.79423e-26	1.85492e-26	-1.08605e-26	-6.13697e-27	-8.6466e-25	-8.87726e-25	-5.02756e-24	1.91503e-24	-1.12282e-22	-4.35049e-22	1.97274e-23	5.64445e-23	-4.05157e-21	-8.98055e-22	-3.75553e-18	2.60989e-17	1.65813e-17	-1.73345e-17	1.04467e-16	1.03458e-16	7.99406e-17	-2.24318e-16	-1.96713e-15	-9.64562e-16	3.29496e-16	9.89512e-16	3.42823e-16	-7.15567e-16	-2.02744e-16	-2.75744e-16	1.88961e-16	3.15669e-15	-1.18984e-16	-1.09884e-15	2.90168e-15	2.91461e-15	-1.93729e-15	3.94269e-16	8.27572e-16	1.12415e-15	3.33489e-15	-2.26677e-15	-5.8784e-14	-5.10576e-14	3.87353e-14	-4.67798e-14	-1.7802e-15
-2.58668e-30	-8.02085e-30	-4.95422e-30	3.00333e-29	-3.10492e-29	1.82258e-29	1.02702e-29	1.44862e-27	1.48841e-27	8.42222e-27	-3.20481e-27	1.88125e-25	7.28878e-25	-3.30559e-26	-9.45667e-26	6.78797e-24	1.50459e-24	6.292e-21	-4.37259e-20	-2.77802e-20	2.90422e-20	-1.75024e-19	-1.73332e-19	-1.33932e-19	3.75821e-19	3.29573e-18	1.61602e-18	-5.52036e-19	-1.65782e-18	-5.74365e-19	1.19886e-18	3.39677e-19	4.6198e-19	-3.16585e-19	-5.28871e-18	1.99345e-19	1.84099e-18	-4.86146e-18	-4.88313e-18	3.24573e-18	-6.60556e-19	-1.38651e-18	-1.88339e-18	-5.58726e-18	3.79773e-18	9.84865e-17	8.55416e-17	-6.4897e-17	7.83748e-17	2.98254e-18
-2.86131e-34	-5.03188e-34	-1.08388e-33	-6.47659e-34	-4.93608e-34	-3.12694e-33	3.14494e-33	1.23619e-33	-1.53546e-32	-8.1351e-32	-9.12845e-32	2.75718e-31	3.74207e-31	-1.01082e-30	-1.62744e-31	-2.80889e-31	-6.16009e-33	-2.4925e-29	-2.68739e-29	3.12263e-29	6.74363e-29	-2.44265e-29	4.01043e-29	-2.61838e-29	1.22407e-28	8.84942e-30	1.30961e-28	1.2916e-28	1.55764e-28	1.5088e-28	6.85512e-28	-2.70796e-28	-2.68542e-28	5.48155e-29	-2.48502e-28	-9.94011e-29	-6.18794e-28	4.92426e-28	1.22788e-27	-1.33113e-27	-9.63449e-29	-1.96139e-28	5.39859e-28	1.04582e-28	-3.97237e-28	1.28696e-27	-7.96558e-28	1.0769e-27	-4.64029e-27	1.86032e-27
-1.65532e-34	-5.14332e-34	-3.1855e-34	1.92195e-33	-1.98919e-33	1.16349e-33	6.56975e-34	9.2693e-32	9.52281e-32	5.38992e-31	-2.05278e-31	1.2039e-29	4.66438e-29	-2.1156e-30	-6.05201e-30	4.34386e-28	9.62851e-29	4.02649e-25	-2.79819e-24	-1.77776e-24	1.85852e-24	-1.12005e-23	-1.10922e-23	-8.57082e-24	2.40502e-23	2.10906e-22	1.03415e-22	-3.53269e-23	-1.0609e-22	-3.67558e-23	7.67195e-23	2.17372e-23	2.95638e-23	-2.02594e-23	-3.38444e-22	1.27568e-23	1.17812e-22	-3.11103e-22	-3.1249e-22	2.07707e-22	-4.22715e-23	-8.87281e-23	-1.20525e-22	-3.5755e-22	2.43031e-22	6.30252e-21	5.47413e-21	-4.153e-21	5.0155e-21	1.90864e-22
-1.76778e-32	-5.48169e-32	-3.3731e-32	2.05288e-31	-2.11999e-31	1.2485e-31	7.03123e-32	9.90237e-30	1.01686e-29	5.75658e-29	-2.1908e-29	1.28596e-27	4.9821e-27	-2.2592e-28	-6.46394e-28	4.63984e-26	1.02841e-26	4.3008e-23	-2.98882e-22	-1.89888e-22	1.98514e-22	-1.19635e-21	-1.18479e-21	-9.15473e-22	2.56887e-21	2.25275e-20	1.10461e-20	-3.77336e-21	-1.13318e-20	-3.92599e-21	8.19462e-21	2.32181e-21	3.1578e-21	-2.16397e-21	-3.61502e-20	1.36259e-21	1.25838e-20	-3.32298e-20	-3.33779e-20	2.21857e-20	-4.51513e-21	-9.4773e-21	-1.28736e-20	-3.81909e-20	2.59589e-20	6.7319e-19	5.84707e-19	-4.43594e-19	5.35719e-19	2.03867e-20
-8.31959e-29	-2.58587e-28	-1.60963e-28	9.67497e-28	-1.00146e-27	5.84892e-28	3.31009e-28	4.66325e-26	4.78665e-26	2.71138e-25	-1.0329e-25	6.05591e-24	2.34638e-23	-1.06435e-24	-3.0443e-24	2.18513e-22	4.84363e-23	2.02549e-19	-1.4076e-18	-8.94288e-19	9.34913e-19	-5.63429e-18	-5.57983e-18	-4.31148e-18	1.20982e-17	1.06094e-16	5.20222e-17	-1.77709e-17	-5.33678e-17	-1.84897e-17	3.85931e-17	1.09347e-17	1.48718e-17	-1.01913e-17	-1.70251e-16	6.41721e-18	5.92643e-17	-1.56498e-16	-1.57195e-16	1.04485e-16	-2.12643e-17	-4.46339e-17	-6.06292e-17	-1.79862e-16	1.22255e-16	3.17043e-15	2.75371e-15	-2.08913e-15	2.523e-15	9.60125e-17
-1.65532e-34	-5.14332e-34	-3.1855e-34	1.92195e-33	-1.98919e-33	1.16349e-33	6.56975e-34	9.2693e-32	9.52281e-32	5.38992e-31	-2.05278e-31	1.2039e-29	4.66438e-29	-2.1156e-30	-6.05201e-30	4.34386e-28	9.62851e-29	4.02649e-25	-2.79819e-24	-1.77776e-24	1.85852e-24	-1.12005e-23	-1.10922e-23	-8.57082e-24	2.40502e-23	2.10906e-22	1.03415e-22	-3.53269e-23	-1.0609e-22	-3.67558e-23	7.67195e-23	2.17372e-23	2.95638e-23	-2.02594e-23	-3.38444e-22	1.27568e-23	1.17812e-22	-3.11103e-22	-3.1249e-22	2.07707e-22	-4.22715e-23	-8.87281e-23	-1.20525e-22	-3.5755e-22	2.43031e-22	6.30252e-21	5.47413e-21	-4.153e-21	5.0155e-21	1.90864e-22
-4.79897e-29	-1.48798e-28	-9.22886e-29	5.56871e-28	-5.76058e-28	3.37333e-28	1.90751e-28	2.68546e-26	2.757e-26	1.56121e-25	-5.94567e-26	3.48738e-24	1.35116e-23	-6.12855e-25	-1.75305e-24	1.25831e-22	2.78915e-23	1.16637e-19	-8.10565e-19	-5.14974e-19	5.38368e-19	-3.24449e-18	-3.21313e-18	-2.48275e-18	6.96675e-18	6.10942e-17	2.99569e-17	-1.02333e-17	-3.07317e-17	-1.06472e-17	2.22237e-17	6.29673e-18	8.56391e-18	-5.86866e-18	-9.80389e-17	3.69534e-18	3.41272e-17	-9.01188e-17	-9.05206e-17	6.01674e-17	-1.2245e-17	-2.57023e-17	-3.49132e-17	-1.03573e-16	7.04001e-17	1.82568e-15	1.58572e-15	-1.20302e-15	1.45286e-15	5.52886e-17
-2.58668e-30	-8.02085e-30	-4.95422e-30	3.00333e-29	-3.10492e-29	1.82258e-29	1.02702e-29	1.44862e-27	1.48841e-27	8.42222e-27	-3.20481e-27	1.88125e-25	7.28878e-25	-3.30559e-26	-9.45667e-26	6.78797e-24	1.50459e-24	6.292e-21	-4.37259e-20	-2.77802e-20	2.90422e-20	-1.75024e-19	-1.73332e-19	-1.33932e-19	3.75821e-19	3.29573e-18	1.61602e-18	-5.52036e-19	-1.65782e-18	-5.74365e-19	1.19886e-18	3.39677e-19	4.6198e-19	-3.16585e-19	-5.28871e-18	1.99345e-19	1.84099e-18	-4.86146e-18	-4.88313e-18	3.24573e-18	-6.60556e-19	-1.38651e-18	-1.88339e-18	-5.58726e-18	3.79773e-18	9.84865e-17	8.55416e-17	-6.4897e-17	7.83748e-17	2.98254e-18
-8.31959e-29	-2.58587e-28	-1.60963e-28	9.67497e-28	-1.00146e-27	5.84892e-28	3.31009e-28	4.66325e-26	4.78665e-26	2.71138e-25	-1.0329e-25	6.05591e-24	2.34638e-23	-1.06435e-24	-3.0443e-24	2.18513e-22	4.84363e-23	2.02549e-19	-1.4076e-18	-8.94288e-19	9.34913e-19	-5.63429e-18	-5.57983e-18	-4.31148e-18	1.20982e-17	1.06094e-16	5.20222e-17	-1.77709e-17	-5.33678e-17	-1.84897e-17	3.85931e-17	1.09347e-17	1.48718e-17	-1.01913e-17	-1.70251e-16	6.41721e-18	5.92643e-17	-1.56498e-16	-1.57195e-16	1.04485e-16	-2.12643e-17	-4.46339e-17	-6.06292e-17	-1.79862e-16	1.22255e-16	3.17043e-15	2.75371e-15	-2.08913e-15	2.523e-15	9.60125e-17
-6.16684e-29	-1.91422e-28	-1.17721e-28	7.14882e-28	-7.38437e-28	4.33255e-28	2.44568e-28	3.44548e-26	3.5363e-26	2.00307e-25	-7.62763e-26	4.47455e-24	1.7336e-23	-7.86e-25	-2.24933e-24	1.61449e-22	3.57855e-23	1.49652e-19	-1.04e-18	-6.60741e-19	6.90757e-19	-4.16287e-18	-4.12264e-18	-3.18552e-18	8.93874e-18	7.83874e-17	3.84364e-17	-1.31299e-17	-3.94306e-17	-1.3661e-17	2.85143e-17	8.07906e-18	1.0988e-17	-7.52983e-18	-1.2579e-16	4.74133e-18	4.37872e-17	-1.15628e-16	-1.16143e-16	7.71983e-17	-1.5711e-17	-3.29776e-17	-4.47956e-17	-1.32891e-16	9.03274e-17	2.34246e-15	2.03457e-15	-1.54355e-15	1.86411e-15	7.09385e-17
-5.08673e-30	-1.5786e-29	-9.7392e-30	5.9002e-29	-6.0984e-29	3.56275e-29	2.01457e-29	2.8401e-27	2.91755e-27	1.65115e-26	-6.29047e-27	3.6881e-25	1.42898e-24	-6.48153e-26	-1.854e-25	1.33079e-23	2.94981e-24	1.23355e-20	-8.57248e-20	-5.44632e-20	5.69374e-20	-3.43136e-19	-3.39819e-19	-2.62574e-19	7.36798e-19	6.46128e-18	3.16822e-18	-1.08227e-18	-3.25017e-18	-1.12604e-18	2.35037e-18	6.65937e-19	9.05713e-19	-6.20665e-19	-1.03685e-17	3.90816e-19	3.60927e-18	-9.5309e-18	-9.5734e-18	6.36327e-18	-1.29502e-18	-2.71826e-18	-3.69239e-18	-1.09538e-17	7.44547e-18	1.93083e-16	1.67705e-16	-1.27231e-16	1.53654e-16	5.84728e-18
-2.58668e-30	-8.02085e-30	-4.95422e-30	3.00333e-29	-3.10492e-29	1.82258e-29	1.02702e-29	1.44862e-27	1.48841e-27	8.42222e-27	-3.20481e-27	1.88125e-25	7.28878e-25	-3.30559e-26	-9.45667e-26	6.78797e-24	1.50459e-24	6.292e-21	-4.37259e-20	-2.77802e-20	2.90422e-20	-1.75024e-19	-1.73332e-19	-1.33932e-19	3.75821e-19	3.29573e-18	1.61602e-18	-5.52036e-19	-1.65782e-18	-5.74365e-19	1.19886e-18	3.39677e-19	4.6198e-19	-3.16585e-19	-5.28871e-18	1.99345e-19	1.84099e-18	-4.86146e-18	-4.88313e-18	3.24573e-18	-6.60556e-19	-1.38651e-18	-1.88339e-18	-5.58726e-18	3.79773e-18	9.84865e-17	8.55416e-17	-6.4897e-17	7.83748e-17	2.98254e-18
2.26826e-29	7.03871e-29	4.37871e-29	-2.6373e-28	2.72798e-28	-1.59943e-28	-9.05025e-29	-1.27198e-26	-1.30537e-26	-7.3943e-26	2.81606e-26	-1.65178e-24	-6.39983e-24	2.90227e-25	8.30375e-25	-5.96008e-23	-1.32107e-23	-5.52461e-20	3.8393e-19	2.43921e-19	-2.55002e-19	1.53678e-18	1.52192e-18	1.17597e-18	-3.29985e-18	-2.89377e-17	-1.41893e-17	4.84708e-18	1.45563e-17	5.04314e-18	-1.05264e-17	-2.98249e-18	-4.05635e-18	2.77973e-18	4.64368e-17	-1.75032e-18	-1.61646e-17	4.26854e-17	4.28757e-17	-2.84987e-17	5.79993e-18	1.21741e-17	1.65369e-17	4.90582e-17	-3.33455e-17	-8.64748e-16	-7.51087e-16	5.69819e-16	-6.8816e-16	-2.61878e-17
2.26826e-29	7.03871e-29	4.37871e-29	-2.6373e-28	2.72798e-28	-1.59943e-28	-9.05025e-29	-1.27198e-26	-1.30537e-26	-7.3943e-26	2.81606e-26	-1.65178e-24	-6.39983e-24	2.90227e-25	8.30375e-25	-5.96008e-23	-1.32107e-23	-5.52461e-20	3.8393e-19	2.43921e-19	-2.55002e-19	1.53678e-18	1.52192e-18	1.17597e-18	-3.29985e-18	-2.89377e-17	-1.41893e-17	4.84708e-18	1.45563e-17	5.04314e-18	-1.05264e-17	-2.98249e-18	-4.05635e-18	2.77973e-18	4.64368e-17	-1.75032e-18	-1.61646e-17	4.26854e-17	4.28757e-17	-2.84987e-17	5.79993e-18	1.21741e-17	1.65369e-17	4.90582e-17	-3.33455e-17	-8.64748e-16	-7.51087e-16	5.69819e-16	-6.8816e-16	-2.61878e-17
-2.32567e-33	-7.22187e-33	-4.47293e-33	2.70487e-32	-2.79653e-32	1.64343e-32	9.26144e-33	1.30544e-30	1.34083e-30	7.5898e-30	-2.88819e-30	1.69529e-28	6.56842e-28	-2.97809e-29	-8.5222e-29	6.11713e-27	1.35589e-27	5.67017e-24	-3.94046e-23	-2.50348e-23	2.61721e-23	-1.57727e-22	-1.56202e-22	-1.20696e-22	3.3868e-22	2.97002e-21	1.45632e-21	-4.9748e-22	-1.49399e-21	-5.17602e-22	1.08038e-21	3.06107e-22	4.16324e-22	-2.85297e-22	-4.76604e-21	1.79644e-22	1.65905e-21	-4.38101e-21	-4.40055e-21	2.92497e-21	-5.95275e-22	-1.24949e-21	-1.69726e-21	-5.03509e-21	3.42241e-21	8.87533e-20	7.70878e-20	-5.84834e-20	7.06292e-20	2.68779e-21
4.55112e-34	-5.69411e-35	-9.24632e-34	1.21809e-33	4.1212e-33	6.5276e-33	3.73681e-33	-2.19871e-33	3.29058e-32	1.29515e-31	8.34008e-33	-1.05605e-30	1.47116e-30	8.537e-31	1.92149e-31	-9.17035e-30	-8.81585e-30	-1.53568e-28	-3.91595e-29	5.50847e-29	8.52865e-29	-1.05897e-28	8.30437e-29	-1.96241e-28	9.80316e-29	-2.40933e-29	-1.02227e-28	-6.09476e-29	-5.0092e-28	3.01411e-28	5.69613e-29	-1.12374e-27	8.10984e-28	-6.22322e-28	6.86093e-28	1.57433e-27	-1.71791e-27	-1.224e-27	1.75478e-28	-2.32149e-28	8.9298e-28	-1.00442e-27	-6.43625e-29	-1.84385e-28	-1.40004e-28	-8.39376e-27	1.69211e-26	3.74797e-27	-6.84715e-27	-2.3072e-27
-4.12626e-29	-1.28044e-28	-7.94662e-29	4.7969e-28	-4.96024e-28	2.91855e-28	1.64943e-28	2.31647e-26	2.37537e-26	1.3466e-25	-5.12497e-26	3.00815e-24	1.16551e-23	-5.28391e-25	-1.51221e-24	1.08544e-22	2.4058e-23	1.00612e-19	-6.99196e-19	-4.44218e-19	4.64398e-19	-2.79871e-18	-2.77166e-18	-2.14163e-18	6.00954e-18	5.27001e-17	2.58409e-17	-8.8273e-18	-2.65093e-17	-9.18434e-18	1.91703e-17	5.43158e-18	7.38725e-18	-5.06232e-18	-8.45687e-17	3.18761e-18	2.94382e-17	-7.77368e-17	-7.80834e-17	5.19006e-17	-1.05626e-17	-2.21709e-17	-3.01162e-17	-8.93427e-17	6.07274e-17	1.57484e-15	1.36785e-15	-1.03773e-15	1.25325e-15	4.76921e-17
4.59567e-29	1.42484e-28	8.72989e-29	-5.31972e-28	5.49301e-28	-3.22462e-28	-1.81677e-28	-2.5634e-26	-2.63443e-26	-1.49027e-25	5.67353e-26	-3.32872e-24	-1.28974e-23	5.84693e-25	1.67333e-24	-1.20112e-22	-2.6623e-23	-1.11336e-19	7.73721e-19	4.91566e-19	-5.13896e-19	3.09702e-18	3.06708e-18	2.3699e-18	-6.65008e-18	-5.83172e-17	-2.85952e-17	9.76817e-18	2.93349e-17	1.01633e-17	-2.12136e-17	-6.01051e-18	-8.17464e-18	5.6019e-18	9.35826e-17	-3.52737e-18	-3.2576e-17	8.60225e-17	8.6406e-17	-5.74326e-17	1.16884e-17	2.4534e-17	3.33262e-17	9.88655e-17	-6.72001e-17	-1.7427e-15	-1.51364e-15	1.14834e-15	-1.38683e-15	-5.27755e-17
-1.98355e-30	-6.15794e-30	-3.80247e-30	2.30371e-29	-2.38133e-29	1.39339e-29	7.88976e-30	1.10966e-27	1.14015e-27	6.45082e-27	-2.45745e-27	1.44109e-25	5.58331e-25	-2.53255e-26	-7.24429e-26	5.19965e-24	1.15253e-24	4.81972e-21	-3.34944e-20	-2.12799e-20	2.22466e-20	-1.3407e-19	-1.32774e-19	-1.02593e-19	2.87882e-19	2.52455e-18	1.23789e-18	-4.22864e-19	-1.26991e-18	-4.39968e-19	9.18336e-19	2.60195e-19	3.5388e-19	-2.42507e-19	-4.05119e-18	1.527e-19	1.41022e-18	-3.72392e-18	-3.74052e-18	2.48626e-18	-5.05992e-19	-1.06208e-18	-1.44269e-18	-4.27989e-18	2.9091e-18	7.54415e-17	6.55256e-17	-4.97116e-17	6.00357e-17	2.28465e-18
-0.000138741	9.49289e-05	-0.000859251	-4.22101e-05	-0.000660548	0.000672674	6.28416e-05	-0.000446952	-0.0289923	-0.000618865	-0.379919	-0.00360227	-0.00122912	-0.000813	0.00161123	0.00574935	0.000446822	0.00263211	-0.0018075	0.00126672	-0.0218133	0.0173336	-0.0018265	-0.0270985	-0.0015831	-0.00245113	-0.0043226	-0.0228219	-0.0191233	0.046533	0.0316458	0.0526353	0.00345706	0.0257142	0.0172179	-0.00135387	0.0870183	-0.0196508	0.0378452	0.0123079	-0.0397596	-0.0039777	0.0207902	-0.0216605	0.00690346	0.0415147	-0.00240768	0.00661967	-0.0220682	-0.0478136
2.26826e-29	7.03871e-29	4.37871e-29	-2.6373e-28	2.72798e-28	-1.59943e-28	-9.05025e-29	-1.27198e-26	-1.30537e-26	-7.3943e-26	2.81606e-26	-1.65178e-24	-6.39983e-24	2.90227e-25	8.30375e-25	-5.96008e-23	-1.32107e-23	-5.52461e-20	3.8393e-19	2.43921e-19	-2.55002e-19	1.53678e-18	1.52192e-18	1.17597e-18	-3.29985e-18	-2.89377e-17	-1.41893e-17	4.84708e-18	1.45563e-17	5.04314e-18	-1.05264e-17	-2.98249e-18	-4.05635e-18	2.77973e-18	4.64368e-17	-1.75032e-18	-1.61646e-17	4.26854e-17	4.28757e-17	-2.84987e-17	5.79993e-18	1.21741e-17	1.65369e-17	4.90582e-17	-3.33455e-17	-8.64748e-16	-7.51087e-16	5.69819e-16	-6.8816e-16	-2.61878e-17
3.39004e-29	1.05281e-28	6.48008e-29	-3.93949e-28	4.06901e-28	-2.39765e-28	-1.35092e-28	-1.90028e-26	-1.95053e-26	-1.10468e-25	4.20608e-26	-2.46783e-24	-9.56126e-24	4.33433e-25	1.24059e-24	-8.90451e-23	-1.97361e-23	-8.25377e-20	5.73592e-19	3.64418e-19	-3.80973e-19	2.29595e-18	2.27376e-18	1.75691e-18	-4.92998e-18	-4.3233e-17	-2.11988e-17	7.24155e-18	2.17472e-17	7.53446e-18	-1.57265e-17	-4.45584e-18	-6.0602e-18	4.15292e-18	6.93767e-17	-2.61499e-18	-2.41499e-17	6.37721e-17	6.40564e-17	-4.25772e-17	8.66511e-18	1.81881e-17	2.47061e-17	7.32931e-17	-4.98183e-17	-1.29194e-15	-1.12213e-15	8.51311e-16	-1.02811e-15	-3.91247e-17
-1.91459e-29	-5.95243e-29	-3.68538e-29	2.22133e-28	-2.29905e-28	1.34283e-28	7.59163e-29	1.07077e-26	1.09985e-26	6.22635e-26	-2.37178e-26	1.39057e-24	5.3879e-24	-2.44377e-25	-6.9905e-25	5.01765e-23	1.11221e-23	4.65103e-20	-3.23221e-19	-2.05351e-19	2.1468e-19	-1.29378e-18	-1.28127e-18	-9.90024e-19	2.77806e-18	2.4362e-17	1.19456e-17	-4.08064e-18	-1.22546e-17	-4.24569e-18	8.86194e-18	2.51088e-18	3.41495e-18	-2.34019e-18	-3.9094e-17	1.47355e-18	1.36086e-17	-3.59358e-17	-3.6096e-17	2.39924e-17	-4.88282e-18	-1.02491e-17	-1.3922e-17	-4.13009e-17	2.80728e-17	7.2801e-16	6.32322e-16	-4.79717e-16	5.79345e-16	2.20469e-17
-1.98678e-30	-6.16513e-30	-3.79406e-30	2.30431e-29	-2.38088e-29	1.39355e-29	7.88775e-30	1.10966e-27	1.14016e-27	6.45088e-27	-2.45763e-27	1.4411e-25	5.58333e-25	-2.53268e-26	-7.24412e-26	5.19962e-24	1.15253e-24	4.81972e-21	-3.34944e-20	-2.12799e-20	2.22466e-20	-1.3407e-19	-1.32774e-19	-1.02593e-19	2.87882e-19	2.52455e-18	1.23789e-18	-4.22864e-19	-1.26991e-18	-4.39968e-19	9.18336e-19	2.60195e-19	3.5388e-19	-2.42507e-19	-4.05119e-18	1.527e-19	1.41022e-18	-3.72392e-18	-3.74052e-18	2.48626e-18	-5.05992e-19	-1.06208e-18	-1.44269e-18	-4.27989e-18	2.9091e-18	7.54415e-17	6.55256e-17	-4.97116e-17	6.00357e-17	2.28465e-18
1.11918e-32	3.47364e-32	2.16038e-32	-1.29934e-31	1.34545e-31	-7.85373e-32	-4.43845e-32	-6.26474e-30	-6.43265e-30	-3.64289e-29	1.38723e-29	-8.13551e-28	-3.15219e-27	1.42968e-28	4.08973e-28	-2.93558e-26	-6.50703e-27	-2.7211e-23	1.89101e-22	1.20141e-22	-1.25599e-22	7.56926e-22	7.4961e-22	5.79215e-22	-1.62531e-21	-1.4253e-20	-6.98881e-21	2.38739e-21	7.16958e-21	2.48395e-21	-5.18469e-21	-1.469e-21	-1.99792e-21	1.36913e-21	2.2872e-20	-8.62106e-22	-7.96172e-21	2.10243e-20	2.11181e-20	-1.40368e-20	2.8567e-21	5.99624e-21	8.14509e-21	2.41632e-20	-1.6424e-20	-4.25924e-19	-3.69941e-19	2.80659e-19	-3.38947e-19	-1.28986e-20
-0.00385088	0.31779	0.0563262	0.0180231	-0.0420607	0.079593	-0.0259765	-0.0055323	0.00232927	0.00101822	0.0432589	0.000140679	-0.00875499	0.00678199	-0.00290613	-0.0397941	-0.0025834	-0.0184747	0.0286315	-0.012364	0.112783	-0.0790517	-0.00338565	0.174421	-0.0181675	0.00461462	0.0173917	0.0648305	-0.0842387	0.417095	0.107503	0.112689	-0.331609	-0.0517766	0.0562399	-0.018411	-0.0193793	-0.0158599	-0.0529644	-0.0169698	0.039478	-0.011267	-0.00148229	-0.021943	-0.0103279	0.00292902	-0.00271749	0.00212222	-0.0003321	0.00101256
-5.55038e-29	-1.72434e-28	-1.06916e-28	6.45091e-28	-6.67005e-28	3.90671e-28	2.20907e-28	3.11004e-26	3.19353e-26	1.80803e-25	-6.88309e-26	4.03853e-24	1.56472e-23	-7.09564e-25	-2.03016e-24	1.45719e-22	3.22995e-23	1.35073e-19	-9.38682e-19	-5.96369e-19	6.23461e-19	-3.75731e-18	-3.72099e-18	-2.87517e-18	8.0679e-18	7.07507e-17	3.46918e-17	-1.18508e-17	-3.55891e-17	-1.23301e-17	2.57364e-17	7.29197e-18	9.9175e-18	-6.79625e-18	-1.13535e-16	4.27941e-18	3.95213e-17	-1.04363e-16	-1.04828e-16	6.96774e-17	-1.41804e-17	-2.97648e-17	-4.04315e-17	-1.19944e-16	8.15274e-17	2.11425e-15	1.83636e-15	-1.39317e-15	1.6825e-15	6.40274e-17
-1.14171e-07	-5.11437e-07	1.82122e-07	-1.29606e-06	-1.97585e-07	-1.10766e-06	7.63029e-07	-1.91222e-06	-1.36394e-05	6.65524e-06	4.41371e-07	-3.78091e-05	-0.000108715	2.01417e-05	-0.000299177	0.000374873	-0.00245626	0.00354214	0.00318824	0.025588	-0.00518588	0.0409364	0.00368664	0.0214096	-0.406492	0.0579989	0.0946703	-0.0230959	-0.0161904	-0.0110328	-0.00228888	0.0492087	0.096861	-0.313339	0.0326702	-0.0351431	0.0489856	-0.0596812	0.0140197	-0.0398236	0.0683282	-0.0101502	-0.00346354	-0.0640824	-0.00287793	-0.0102444	0.108995	0.0691451	-0.0663942	-0.0363286
-8.62245e-34	4.43877e-35	-3.29717e-34	-1.64805e-35	1.98788e-33	-3.47279e-33	4.33662e-34	-1.75128e-33	-1.47801e-32	-1.40635e-31	5.9451e-32	-8.88894e-31	6.49995e-31	5.19707e-31	1.84352e-30	-2.03092e-30	-5.11261e-30	3.08066e-29	-1.69396e-29	-4.29604e-29	-7.13191e-29	-3.86017e-29	-1.98603e-29	-3.26032e-29	8.83686e-29	-3.3886e-29	-9.05331e-29	4.06659e-29	3.49055e-29	-9.11673e-29	1.91359e-28	3.45559e-28	2.39033e-28	2.86684e-28	4.08836e-28	2.88873e-28	-4.47502e-28	-6.06483e-28	1.54495e-28	-2.29184e-28	1.17632e-28	-2.98837e-28	9.78895e-29	-4.06436e-29	3.02217e-27	-4.37405e-31	-3.11124e-27	-4.18597e-27	-5.16722e-27	3.38173e-27
0.00016377	9.6295e-05	0.000996022	0.00287817	-0.00193282	0.00122975	-0.00501753	-0.00315297	0.498489	-0.000848986	-0.0380244	9.02991e-05	-0.00142424	-0.00193654	0.00239484	-0.00042615	-0.00075785	0.000126873	1.07126e-05	1.86404e-05	-7.38864e-05	1.21725e-05	-0.000110765	-0.000196655	8.78486e-05	0.000261093	0.00035242	-0.000152433	7.90466e-05	-0.000233594	0.000154763	3.85818e-05	-0.00054101	-0.000733467	-0.00145653	0.000804574	-0.000281183	0.000647747	-0.000440181	0.00308789	0.00181008	-0.00354217	-0.000410176	-0.00302219	0.00117329	0.000859952	0.00394774	0.00716867	0.00481184	0.00316979
-1.20304e-09	-6.66353e-09	2.18153e-09	3.37275e-09	8.44332e-10	2.38556e-09	-5.27665e-09	1.74136e-08	6.37056e-09	-2.47328e-07	-6.86235e-08	-5.53997e-07	3.29122e-06	1.86259e-06	-1.38547e-06	-3.19822e-07	-3.19304e-06	4.64127e-05	-4.09789e-05	1.00977e-05	-2.95003e-05	1.93587e-05	0.000220658	0.000100778	-0.000860758	-0.000168518	0.000406437	0.000274666	0.000647614	-0.00106463	0.00265053	-0.0011026	-0.00145418	0.000810983	-0.000422053	0.000212414	0.000330508	0.00253438	0.000474852	0.00214558	0.0029495	-0.00179754	-0.000436514	-0.000648296	0.0293375	-0.0035515	0.00428419	-0.00317333	-0.00553857	0.00571922
-1.02721e-29	-3.19019e-29	-1.97189e-29	1.19355e-28	-1.23381e-28	7.23799e-29	4.08914e-29	5.75621e-27	5.90816e-27	3.34669e-26	-1.27421e-26	7.47564e-25	2.8963e-24	-1.31345e-25	-3.75791e-25	2.69731e-23	5.97869e-24	2.50023e-20	-1.73752e-19	-1.10389e-19	1.15404e-19	-6.95488e-19	-6.88766e-19	-5.32202e-19	1.49339e-18	1.30961e-17	6.42154e-18	-2.19361e-18	-6.58764e-18	-2.28234e-18	4.76387e-18	1.34976e-18	1.83575e-18	-1.258e-18	-2.10156e-17	7.92131e-19	7.31549e-18	-1.93178e-17	-1.9404e-17	1.28975e-17	-2.62483e-18	-5.50954e-18	-7.48397e-18	-2.22019e-17	1.50909e-17	3.91353e-16	3.39914e-16	-2.57879e-16	3.11435e-16	1.18516e-17
-2.99524e-34	-9.30258e-34	-5.74999e-34	3.47261e-33	-3.59245e-33	2.10622e-33	1.1916e-33	1.67633e-31	1.71923e-31	9.74751e-31	-3.70964e-31	2.17675e-29	8.43419e-29	-3.82477e-30	-1.09426e-29	7.85466e-28	1.74105e-28	7.28077e-25	-5.05974e-24	-3.21458e-24	3.36061e-24	-2.02529e-23	-2.00571e-23	-1.54979e-23	4.34881e-23	3.81364e-22	1.86998e-22	-6.38788e-23	-1.91835e-22	-6.64625e-23	1.38726e-22	3.93056e-23	5.34579e-23	-3.66335e-23	-6.11981e-22	2.30672e-23	2.1303e-22	-5.62543e-22	-5.65051e-22	3.75579e-22	-7.64361e-23	-1.6044e-22	-2.17936e-22	-6.46529e-22	4.39454e-22	1.13963e-20	9.89843e-21	-7.50954e-21	9.06912e-21	3.45124e-22
-2.58668e-30	-8.02085e-30	-4.95422e-30	3.00333e-29	-3.10492e-29	1.82258e-29	1.02702e-29	1.44862e-27	1.48841e-27	8.42222e-27	-3.20481e-27	1.88125e-25	7.28878e-25	-3.30559e-26	-9.45667e-26	6.78797e-24	1.50459e-24	6.292e-21	-4.37259e-20	-2.77802e-20	2.90422e-20	-1.75024e-19	-1.73332e-19	-1.33932e-19	3.75821e-19	3.29573e-18	1.61602e-18	-5.52036e-19	-1.65782e-18	-5.74365e-19	1.19886e-18	3.39677e-19	4.6198e-19	-3.16585e-19	-5.28871e-18	1.99345e-19	1.84099e-18	-4.86146e-18	-4.88313e-18	3.24573e-18	-6.60556e-19	-1.38651e-18	-1.88339e-18	-5.58726e-18	3.79773e-18	9.84865e-17	8.55416e-17	-6.4897e-17	7.83748e-17	2.98254e-18
-5.55038e-29	-1.72434e-28	-1.06916e-28	6.45091e-28	-6.67005e-28	3.90671e-28	2.20907e-28	3.11004e-26	3.19353e-26	1.80803e-25	-6.88309e-26	4.03853e-24	1.56472e-23	-7.09564e-25	-2.03016e-24	1.45719e-22	3.22995e-23	1.35073e-19	-9.38682e-19	-5.96369e-19	6.23461e-19	-3.75731e-18	-3.72099e-18	-2.87517e-18	8.0679e-18	7.07507e-17	3.46918e-17	-1.18508e-17	-3.55891e-17	-1.23301e-17	2.57364e-17	7.29197e-18	9.9175e-18	-6.79625e-18	-1.13535e-16	4.27941e-18	3.95213e-17	-1.04363e-16	-1.04828e-16	6.96774e-17	-1.41804e-17	-2.97648e-17	-4.04315e-17	-1.19944e-16	8.15274e-17	2.11425e-15	1.83636e-15	-1.39317e-15	1.6825e-15	6.40274e-17
0.000151977	0.000511183	0.000817897	0.000333949	-0.00155555	0.00137961	-0.000602306	-0.000519637	-0.000758249	-0.447101	0.000842065	-0.00268392	-0.00351747	-0.00154051	0.00471534	-0.000397746	0.000208563	0.000204179	-0.000834706	0.000800537	-0.000256041	-0.00116841	0.00226842	0.000166218	0.00227198	-0.000745595	-0.00187057	0.00377302	0.00212139	-3.80149e-05	0.0016323	-0.0071014	0.00954192	0.0278675	-0.0104886	-0.0182574	-0.0295502	0.0135869	-0.0302333	0.0245733	-0.012679	0.0511528	0.0374843	-0.204765	-0.0177219	-0.00429396	0.00961261	-0.00504854	-0.0154853	0.00727883
-1.26052e-08	-2.27759e-08	1.66284e-09	-6.43155e-08	4.27864e-08	7.88601e-08	-2.42742e-08	7.76621e-08	-1.08016e-06	-3.54437e-06	-1.72172e-07	2.75174e-05	-1.15781e-05	2.4584e-05	-6.71613e-06	8.67629e-05	-7.52383e-05	0.000533726	-0.000313753	-0.000734603	-0.00110124	0.0029794	-0.00252689	-0.000718186	0.00129925	0.00462312	0.00554691	0.00391834	-0.00677782	0.0432628	-0.0603049	0.0130204	0.0386762	-0.0576902	0.190496	-0.0589438	-0.154038	0.0861139	0.141866	0.232046	-0.113656	0.0207991	0.0323896	0.0409279	-0.0102103	0.295999	0.187809	-0.142175	0.128087	0.0131744
-1.13446e-27	-3.52236e-27	-2.19378e-27	1.32138e-26	-1.36689e-26	7.99042e-27	4.51239e-27	6.36503e-25	6.54644e-25	3.70028e-24	-1.40961e-24	8.26572e-23	3.2026e-22	-1.45267e-23	-4.15532e-23	2.98252e-21	6.61098e-22	2.76459e-18	-1.92124e-17	-1.22062e-17	1.27606e-17	-7.69026e-17	-7.61592e-17	-5.88474e-17	1.65129e-16	1.44808e-15	7.10052e-16	-2.42555e-16	-7.28419e-16	-2.52366e-16	5.26757e-16	1.49248e-16	2.02986e-16	-1.39102e-16	-2.32376e-15	8.75887e-17	8.08899e-16	-2.13604e-15	-2.14556e-15	1.42612e-15	-2.90237e-16	-6.09209e-16	-8.27529e-16	-2.45495e-15	1.66866e-15	4.32732e-14	3.75855e-14	-2.85146e-14	3.44365e-14	1.31048e-15
-2.58668e-30	-8.02085e-30	-4.95422e-30	3.00333e-29	-3.10492e-29	1.82258e-29	1.02702e-29	1.44862e-27	1.48841e-27	8.42222e-27	-3.20481e-27	1.88125e-25	7.28878e-25	-3.30559e-26	-9.45667e-26	6.78797e-24	1.50459e-24	6.292e-21	-4.37259e-20	-2.77802e-20	2.90422e-20	-1.75024e-19	-1.73332e-19	-1.33932e-19	3.75821e-19	3.29573e-18	1.61602e-18	-5.52036e-19	-1.65782e-18	-5.74365e-19	1.19886e-18	3.39677e-19	4.6198e-19	-3.16585e-19	-5.28871e-18	1.99345e-19	1.84099e-18	-4.86146e-18	-4.88313e-18	3.24573e-18	-6.60556e-19	-1.38651e-18	-1.88339e-18	-5.58726e-18	3.79773e-18	9.84865e-17	8.55416e-17	-6.4897e-17	7.83748e-17	2.98254e-18
-8.16553e-34	-2.62488e-35	-2.69602e-34	-1.55204e-34	1.9921e-33	-3.51173e-33	7.80827e-34	-1.5413e-33	-1.53743e-32	-1.34129e-31	5.66628e-32	-9.26174e-31	5.99361e-31	5.42295e-31	1.85704e-30	-2.01927e-30	-5.27972e-30	3.00552e-29	-1.93864e-29	-4.50499e-29	-6.68099e-29	-3.01619e-29	-1.91182e-29	-3.12439e-29	8.57788e-29	-3.01356e-29	-8.58357e-29	3.55549e-29	3.70102e-29	-9.14713e-29	1.79766e-28	3.4222e-28	2.29271e-28	3.11413e-28	4.06637e-28	2.79449e-28	-4.00931e-28	-5.99766e-28	1.7304e-28	-2.29626e-28	1.00602e-28	-2.50971e-28	9.36558e-29	-6.27838e-29	2.77204e-27	-3.90543e-28	-2.98977e-27	-4.13355e-27	-4.89217e-27	2.39573e-27
3.23506e-28	1.00511e-27	6.22383e-28	-3.76097e-27	3.89003e-27	-2.27184e-27	-1.28552e-27	-1.81096e-25	-1.86034e-25	-1.05288e-24	4.0119e-25	-2.35178e-23	-9.11195e-23	4.13277e-24	1.1822e-23	-8.4858e-22	-1.88093e-22	-7.86579e-19	5.46629e-18	3.47288e-18	-3.63064e-18	2.18802e-17	2.16687e-17	1.67432e-17	-4.69824e-17	-4.12007e-16	-2.02023e-16	6.90115e-17	2.07249e-16	7.18028e-17	-1.49872e-16	-4.24639e-17	-5.77533e-17	3.95771e-17	6.61155e-16	-2.49206e-17	-2.30147e-16	6.07744e-16	6.10453e-16	-4.05757e-16	8.25778e-17	1.73331e-16	2.35447e-16	6.98478e-16	-4.74765e-16	-1.2312e-14	-1.06938e-14	8.11294e-15	-9.79783e-15	-3.72855e-16
1.73398e-30	5.39046e-30	3.33478e-30	-2.01506e-29	2.08421e-29	-1.2181e-29	-6.87581e-30	-9.70855e-28	-9.98074e-28	-5.64544e-27	2.15095e-27	-1.26092e-25	-4.88539e-25	2.21563e-26	6.33873e-26	-4.5497e-24	-1.00846e-24	-4.21726e-21	2.93076e-20	1.86199e-20	-1.94658e-20	1.17311e-19	1.16177e-19	8.9769e-20	-2.51897e-19	-2.20899e-18	-1.08315e-18	3.70006e-19	1.11117e-18	3.84972e-19	-8.03544e-19	-2.27671e-19	-3.09645e-19	2.12193e-19	3.54479e-18	-1.33612e-19	-1.23394e-18	3.25843e-18	3.27296e-18	-2.17548e-18	4.42743e-19	9.2932e-19	1.26236e-18	3.7449e-18	-2.54546e-18	-6.60113e-17	-5.73349e-17	4.34977e-17	-5.25313e-17	-1.99907e-18
-5.08673e-30	-1.5786e-29	-9.7392e-30	5.9002e-29	-6.0984e-29	3.56275e-29	2.01457e-29	2.8401e-27	2.91755e-27	1.65115e-26	-6.29047e-27	3.6881e-25	1.42898e-24	-6.48153e-26	-1.854e-25	1.33079e-23	2.94981e-24	1.23355e-20	-8.57248e-20	-5.44632e-20	5.69374e-20	-3.43136e-19	-3.39819e-19	-2.62574e-19	7.36798e-19	6.46128e-18	3.16822e-18	-1.08227e-18	-3.25017e-18	-1.12604e-18	2.35037e-18	6.65937e-19	9.05713e-19	-6.20665e-19	-1.03685e-17	3.90816e-19	3.60927e-18	-9.5309e-18	-9.5734e-18	6.36327e-18	-1.29502e-18	-2.71826e-18	-3.69239e-18	-1.09538e-17	7.44547e-18	1.93083e-16	1.67705e-16	-1.27231e-16	1.53654e-16	5.84728e-18
1.1217e-32	3.47941e-32	2.15405e-32	-1.29983e-31	1.34521e-31	-7.8517e-32	-4.43813e-32	-6.26473e-30	-6.4332e-30	-3.64283e-29	1.38719e-29	-8.1355e-28	-3.15218e-27	1.42977e-28	4.08966e-28	-2.93558e-26	-6.50706e-27	-2.7211e-23	1.89101e-22	1.20141e-22	-1.25599e-22	7.56926e-22	7.4961e-22	5.79215e-22	-1.62531e-21	-1.4253e-20	-6.98881e-21	2.38739e-21	7.16958e-21	2.48395e-21	-5.18469e-21	-1.469e-21	-1.99792e-21	1.36913e-21	2.2872e-20	-8.62106e-22	-7.96173e-21	2.10243e-20	2.11181e-20	-1.40368e-20	2.8567e-21	5.99624e-21	8.14509e-21	2.41632e-20	-1.6424e-20	-4.25924e-19	-3.69941e-19	2.80659e-19	-3.38947e-19	-1.28986e-20
0.00626073	0.0333533	-0.0265473	-0.510049	-0.337973	0.0509144	0.185513	0.00647227	0.00397109	0.00168356	0.00679184	0.0277821	-0.204363	0.15276	0.00741457	0.0109984	0.00744048	-0.00136088	0.00466902	0.0017464	0.0195682	-0.0171818	0.00225962	0.0214189	-0.0042761	0.00231833	-0.00179553	-0.0660234	-0.000904704	-0.0558102	0.0168876	0.0299033	0.0413934	0.0706018	0.124716	0.124346	-0.0766329	-0.3254	-0.063048	0.038861	0.164763	0.0875293	0.555835	0.104158	0.0245155	0.00579623	-0.0098459	0.00594091	0.009297	0.00779347
3.39004e-29	1.05281e-28	6.48008e-29	-3.93949e-28	4.06901e-28	-2.39765e-28	-1.35092e-28	-1.90028e-26	-1.95053e-26	-1.10468e-25	4.20608e-26	-2.46783e-24	-9.56126e-24	4.33433e-25	1.24059e-24	-8.90451e-23	-1.97361e-23	-8.25377e-20	5.73592e-19	3.64418e-19	-3.80973e-19	2.29595e-18	2.27376e-18	1.75691e-18	-4.92998e-18	-4.3233e-17	-2.11988e-17	7.24155e-18	2.17472e-17	7.53446e-18	-1.57265e-17	-4.45584e-18	-6.0602e-18	4.15292e-18	6.93767e-17	-2.61499e-18	-2.41499e-17	6.37721e-17	6.40564e-17	-4.25772e-17	8.66511e-18	1.81881e-17	2.47061e-17	7.32931e-17	-4.98183e-17	-1.29194e-15	-1.12213e-15	8.51311e-16	-1.02811e-15	-3.91247e-17
-1.23987e-29	-3.84885e-29	-2.37944e-29	1.43885e-28	-1.48909e-28	8.69692e-29	4.90104e-29	6.9285e-27	7.12642e-27	4.02841e-26	-1.53509e-26	8.997e-25	3.48607e-24	-1.58114e-25	-4.52319e-25	3.24653e-23	7.19612e-24	3.00931e-20	-2.09131e-19	-1.32866e-19	1.38902e-19	-8.371e-19	-8.29008e-19	-6.40566e-19	1.79746e-18	1.57627e-17	7.72906e-18	-2.64026e-18	-7.92898e-18	-2.74705e-18	5.73386e-18	1.62459e-18	2.20954e-18	-1.51415e-18	-2.52946e-17	9.5342e-19	8.80503e-18	-2.32512e-17	-2.33549e-17	1.55236e-17	-3.15928e-18	-6.63136e-18	-9.00781e-18	-2.67226e-17	1.81637e-17	4.71038e-16	4.09126e-16	-3.10387e-16	3.74848e-16	1.42648e-17
-2.58668e-30	-8.02085e-30	-4.95422e-30	3.00333e-29	-3.10492e-29	1.82258e-29	1.02702e-29	1.44862e-27	1.48841e-27	8.42222e-27	-3.20481e-27	1.88125e-25	7.28878e-25	-3.30559e-26	-9.45667e-26	6.78797e-24	1.50459e-24	6.292e-21	-4.37259e-20	-2.77802e-20	2.90422e-20	-1.75024e-19	-1.73332e-19	-1.33932e-19	3.75821e-19	3.29573e-18	1.61602e-18	-5.52036e-19	-1.65782e-18	-5.74365e-19	1.19886e-18	3.39677e-19	4.6198e-19	-3.16585e-19	-5.28871e-18	1.99345e-19	1.84099e-18	-4.86146e-18	-4.88313e-18	3.24573e-18	-6.60556e-19	-1.38651e-18	-1.88339e-18	-5.58726e-18	3.79773e-18	9.84865e-17	8.55416e-17	-6.4897e-17	7.83748e-17	2.98254e-18
-8.00952e-34	-3.34842e-35	-2.18267e-34	-5.34285e-35	1.94801e-33	-3.49254e-33	8.75505e-34	-1.56086e-33	-1.5373e-32	-1.31069e-31	5.17252e-32	-9.25282e-31	5.83949e-31	4.9095e-31	1.88884e-30	-2.00736e-30	-5.30972e-30	2.89603e-29	-2.03117e-29	-4.53725e-29	-6.45753e-29	-3.03207e-29	-1.75991e-29	-3.06639e-29	8.30335e-29	-2.83887e-29	-8.72869e-29	4.05614e-29	3.62606e-29	-9.62018e-29	1.72116e-28	3.52523e-28	2.51678e-28	3.19625e-28	3.95751e-28	2.339e-28	-3.87395e-28	-5.9311e-28	2.16966e-28	-2.18471e-28	1.47119e-28	-2.42469e-28	6.99511e-29	-5.45702e-29	2.71549e-27	-3.94626e-28	-3.0984e-27	-4.17837e-27	-4.88597e-27	2.62767e-27
4.59567e-29	1.42484e-28	8.72989e-29	-5.31972e-28	5.49301e-28	-3.22462e-28	-1.81677e-28	-2.5634e-26	-2.63443e-26	-1.49027e-25	5.67353e-26	-3.32872e-24	-1.28974e-23	5.84693e-25	1.67333e-24	-1.20112e-22	-2.6623e-23	-1.11336e-19	7.73721e-19	4.91566e-19	-5.13896e-19	3.09702e-18	3.06708e-18	2.3699e-18	-6.65008e-18	-5.83172e-17	-2.85952e-17	9.76817e-18	2.93349e-17	1.01633e-17	-2.12136e-17	-6.01051e-18	-8.17464e-18	5.6019e-18	9.35826e-17	-3.52737e-18	-3.2576e-17	8.60225e-17	8.6406e-17	-5.74326e-17	1.16884e-17	2.4534e-17	3.33262e-17	9.88655e-17	-6.72001e-17	-1.7427e-15	-1.51364e-15	1.14834e-15	-1.38683e-15	-5.27755e-17
-1.1198e-05	-3.57106e-05	-8.00402e-05	0.000146871	4.28302e-05	-4.45022e-05	7.97887e-05	7.52532e-05	-0.00186796	0.00466906	0.0039866	-0.20231	-0.338684	-0.415099	-0.0640113	0.00961031	0.0321368	0.000482454	-0.00380148	0.00265008	-0.000704517	0.00139587	0.000773182	0.000344554	-0.00228827	0.00474243	-0.00359041	-0.0029237	-0.0100676	0.00924111	-0.0144826	-0.014031	0.00478225	0.0464982	0.0637542	0.146524	0.0820869	-0.0123211	0.061173	0.155651	0.254707	0.131593	-0.143912	-0.0234736	-0.00763267	0.00275807	-0.00984446	-0.000371413	0.00149661	0.00610042
-2.5682e-30	1.1114e-30	-9.44656e-30	2.32227e-29	-1.62462e-29	1.23091e-30	7.64918e-30	-1.79627e-29	2.86532e-28	2.85093e-28	-1.03476e-27	5.54405e-27	2.83613e-27	1.07098e-27	-4.07233e-27	-2.23959e-26	-2.56823e-26	1.23509e-25	1.42357e-25	6.47964e-25	-8.03037e-25	5.85101e-26	-5.46905e-25	-4.21008e-25	6.56784e-25	-3.4295e-25	-1.126e-24	4.73368e-25	-7.4114e-25	-7.16188e-25	1.66941e-24	-2.46827e-24	3.15187e-24	1.44284e-25	1.89583e-24	1.01808e-24	-1.20191e-24	-2.57381e-24	3.07163e-24	1.9346e-24	4.99298e-24	-2.3097e-24	-1.95199e-24	1.00467e-24	2.26983e-23	1.6898e-23	-1.2613e-24	-1.92687e-23	-5.02299e-23	2.30407e-23
1.11918e-32	3.47364e-32	2.16038e-32	-1.29934e-31	1.34545e-31	-7.85373e-32	-4.43845e-32	-6.26474e-30	-6.43265e-30	-3.64289e-29	1.38723e-29	-8.13551e-28	-3.15219e-27	1.42968e-28	4.08973e-28	-2.93558e-26	-6.50703e-27	-2.7211e-23	1.89101e-22	1.20141e-22	-1.25599e-22	7.56926e-22	7.4961e-22	5.79215e-22	-1.62531e-21	-1.4253e-20	-6.98881e-21	2.38739e-21	7.16958e-21	2.48395e-21	-5.18469e-21	-1.469e-21	-1.99792e-21	1.36913e-21	2.2872e-20	-8.62106e-22	-7.96172e-21	2.10243e-20	2.11181e-20	-1.40368e-20	2.8567e-21	5.99624e-21	8.14509e-21	2.41632e-20	-1.6424e-20	-4.25924e-19	-3.69941e-19	2.80659e-19	-3.38947e-19	-1.28986e-20
1.35464e-31	4.20311e-31	2.59434e-31	-1.57006e-30	1.62363e-30	-9.48972e-31	-5.35774e-31	-7.56413e-29	-7.76725e-29	-4.39804e-28	1.67476e-28	-9.82303e-27	-3.8058e-26	1.72624e-27	4.93758e-27	-3.54428e-25	-7.8562e-26	-3.28532e-22	2.28312e-21	1.45052e-21	-1.51642e-21	9.13876e-21	9.05042e-21	6.99316e-21	-1.96232e-20	-1.72084e-19	-8.43795e-20	2.88242e-20	8.6562e-20	2.999e-20	-6.25975e-20	-1.7736e-20	-2.41219e-20	1.65302e-20	2.76146e-19	-1.04086e-20	-9.6126e-20	2.53837e-19	2.54969e-19	-1.69473e-19	3.44904e-20	7.23957e-20	9.83398e-20	2.91735e-19	-1.98296e-19	-5.1424e-18	-4.46649e-18	3.38855e-18	-4.09228e-18	-1.55731e-19
-6.15617e-29	-1.91199e-28	-1.17991e-28	7.14694e-28	-7.38448e-28	4.3344e-28	2.44514e-28	3.44548e-26	3.53634e-26	2.00309e-25	-7.62818e-26	4.47461e-24	1.7336e-23	-7.86029e-25	-2.24926e-24	1.61449e-22	3.57853e-23	1.49652e-19	-1.04e-18	-6.60741e-19	6.90757e-19	-4.16287e-18	-4.12264e-18	-3.18552e-18	8.93874e-18	7.83874e-17	3.84364e-17	-1.31299e-17	-3.94306e-17	-1.3661e-17	2.85143e-17	8.07906e-18	1.0988e-17	-7.52983e-18	-1.2579e-16	4.74133e-18	4.37872e-17	-1.15628e-16	-1.16143e-16	7.71983e-17	-1.5711e-17	-3.29776e-17	-4.47956e-17	-1.32891e-16	9.03274e-17	2.34246e-15	2.03457e-15	-1.54355e-15	1.86411e-15	7.09385e-17
-0.632013	-0.0131256	0.00668051	-0.00203433	-0.00996514	0.010832	-0.00173889	-0.0109274	4.90476e-05	-0.000139147	0.000172107	-0.000431414	0.0003206	0.000293856	0.000509132	0.00175822	-0.00100892	-0.0860411	0.132197	0.252783	-0.0681721	-0.0181301	-0.0730459	0.0231914	0.0130325	-0.00877908	-0.00559789	0.00571957	-0.00420631	-0.00321324	-0.000656079	-0.00329527	-0.00343168	-0.00142411	-0.00049706	0.000197876	-0.000648766	-0.000471297	-0.000390851	0.000734388	0.00026278	0.00020979	-0.000240882	1.4697e-06	-9.18914e-05	0.000735873	0.000255124	0.000283252	9.77275e-05	0.00015413
3.47085e-29	1.07879e-28	6.69946e-29	-4.03992e-28	4.17772e-28	-2.44721e-28	-1.3852e-28	-1.94746e-26	-1.99901e-26	-1.1321e-25	4.31214e-26	-2.52898e-24	-9.79866e-24	4.44337e-25	1.27139e-24	-9.12544e-23	-2.02269e-23	-8.45861e-20	5.87827e-19	3.73462e-19	-3.90428e-19	2.35293e-18	2.33019e-18	1.80051e-18	-5.05233e-18	-4.43059e-17	-2.17249e-17	7.42127e-18	2.22869e-17	7.72144e-18	-1.61168e-17	-4.56643e-18	-6.2106e-18	4.25599e-18	7.10984e-17	-2.67988e-18	-2.47493e-17	6.53548e-17	6.56461e-17	-4.36338e-17	8.88015e-18	1.86395e-17	2.53193e-17	7.51121e-17	-5.10546e-17	-1.324e-15	-1.14997e-15	8.72439e-16	-1.05363e-15	-4.00957e-17
1.80805e-36	-5.63442e-36	-7.38652e-36	-4.35489e-37	1.4675e-35	-1.0624e-35	2.11923e-36	-1.13182e-35	5.26877e-34	2.82501e-34	-1.38402e-35	4.23332e-33	-8.70224e-33	5.40447e-33	-5.67264e-33	2.32493e-32	1.87907e-32	2.69217e-31	1.60412e-33	2.34464e-31	-1.14575e-31	7.16972e-32	3.59259e-31	-1.12969e-30	1.06499e-30	-3.12969e-31	-2.86152e-31	8.16162e-31	-1.17132e-30	-2.0471e-30	-2.81319e-30	-7.32176e-30	-5.36538e-31	-5.63174e-30	2.68916e-30	1.15834e-29	4.2243e-30	-4.8047e-30	-2.01037e-30	-5.86898e-33	-8.98045e-30	3.5575e-30	2.01979e-29	-3.24351e-31	-2.40716e-30	1.88129e-29	-8.97809e-30	4.15337e-31	-8.88671e-30	-3.89846e-29
-2.56926e-30	1.11186e-30	-9.45047e-30	2.32323e-29	-1.62529e-29	1.23142e-30	7.65234e-30	-1.79701e-29	2.8665e-28	2.85211e-28	-1.03519e-27	5.54635e-27	2.8373e-27	1.07142e-27	-4.07402e-27	-2.24051e-26	-2.56929e-26	1.2356e-25	1.42416e-25	6.48232e-25	-8.03369e-25	5.85343e-26	-5.47131e-25	-4.21182e-25	6.57055e-25	-3.43092e-25	-1.12647e-24	4.73564e-25	-7.41446e-25	-7.16484e-25	1.6701e-24	-2.46929e-24	3.15317e-24	1.44344e-25	1.89661e-24	1.0185e-24	-1.2024e-24	-2.57488e-24	3.0729e-24	1.9354e-24	4.99504e-24	-2.31066e-24	-1.9528e-24	1.00508e-24	2.27076e-23	1.6905e-23	-1.26182e-24	-1.92766e-23	-5.02507e-23	2.30502e-23
-5.56082e-29	-1.72673e-28	-1.06664e-28	6.45298e-28	-6.66846e-28	3.90713e-28	2.20878e-28	3.11005e-26	3.19282e-26	1.80801e-25	-6.88382e-26	4.03854e-24	1.56472e-23	-7.09597e-25	-2.0301e-24	1.45721e-22	3.22993e-23	1.35073e-19	-9.38682e-19	-5.96369e-19	6.23461e-19	-3.75731e-18	-3.72099e-18	-2.87517e-18	8.0679e-18	7.07507e-17	3.46918e-17	-1.18508e-17	-3.55891e-17	-1.23301e-17	2.57364e-17	7.29197e-18	9.9175e-18	-6.79625e-18	-1.13535e-16	4.27941e-18	3.95213e-17	-1.04363e-16	-1.04828e-16	6.96774e-17	-1.41804e-17	-2.97648e-17	-4.04315e-17	-1.19944e-16	8.15274e-17	2.11425e-15	1.83636e-15	-1.39317e-15	1.6825e-15	6.40274e-17
1.14094e-07	5.1116e-07	-1.82017e-07	1.29568e-06	1.97534e-07	1.10711e-06	-7.62471e-07	1.9113e-06	1.3635e-05	-6.64931e-06	-4.47514e-07	3.77782e-05	0.000108559	-2.01948e-05	0.000299069	-0.000374693	0.00245583	-0.00353525	-0.0031896	-0.0255818	0.00517327	-0.0409343	-0.00369208	-0.0214018	0.406367	-0.0579594	-0.0946391	0.0230903	0.0161285	0.0110637	0.00211952	-0.0491192	-0.0969028	0.313314	-0.032628	0.0353453	-0.0489246	0.0596239	-0.0140602	0.0398363	-0.0679678	0.0100304	0.00335689	0.0641608	0.00287817	0.0104536	-0.10807	-0.0686136	0.0658562	0.0353649
-2.58668e-30	-8.02085e-30	-4.95422e-30	3.00333e-29	-3.10492e-29	1.82258e-29	1.02702e-29	1.44862e-27	1.48841e-27	8.42222e-27	-3.20481e-27	1.88125e-25	7.28878e-25	-3.30559e-26	-9.45667e-26	6.78797e-24	1.50459e-24	6.292e-21	-4.37259e-20	-2.77802e-20	2.90422e-20	-1.75024e-19	-1.73332e-19	-1.33932e-19	3.75821e-19	3.29573e-18	1.61602e-18	-5.52036e-19	-1.65782e-18	-5.74365e-19	1.19886e-18	3.39677e-19	4.6198e-19	-3.16585e-19	-5.28871e-18	1.99345e-19	1.84099e-18	-4.86146e-18	-4.88313e-18	3.24573e-18	-6.60556e-19	-1.38651e-18	-1.88339e-18	-5.58726e-18	3.79773e-18	9.84865e-17	8.55416e-17	-6.4897e-17	7.83748e-17	2.98254e-18
-0.00384946	0.317806	0.0563306	0.0180256	-0.0420624	0.0795992	-0.0259836	-0.00552375	0.00240095	0.000992496	0.0438153	-0.000391331	-0.0080904	0.00695757	-0.0032711	-0.0434374	0.000511142	0.730922	0.0566416	0.0699564	-0.486693	0.273573	-0.143929	-0.0680337	0.0367037	-0.00505291	-0.0100356	0.0178972	0.0232327	-0.0297919	-0.000190389	0.00239128	0.0070625	0.00159439	-0.0039886	-0.00102109	-0.00243482	-0.000693838	0.00302729	-0.00282542	0.00177739	0.000996684	0.000400147	-0.0002298	-0.00245525	0.00030849	-0.000734728	0.000122503	-0.000508529	0.000598035
5.69305e-34	1.7673e-33	1.09159e-33	-6.59527e-33	6.82497e-33	-3.99912e-33	-2.25771e-33	-3.18314e-31	-3.26721e-31	-1.85097e-30	7.04567e-31	-4.13358e-29	-1.60165e-28	7.26278e-30	2.07801e-29	-1.4916e-27	-3.30622e-28	-1.38261e-24	9.60839e-24	6.10446e-24	-6.38177e-24	3.846e-23	3.80883e-23	2.94304e-23	-8.25834e-23	-7.24207e-22	-3.55107e-22	1.21305e-22	3.64292e-22	1.26212e-22	-2.63439e-22	-7.4641e-23	-1.01516e-22	6.95667e-23	1.16215e-21	-4.38043e-23	-4.04542e-22	1.06826e-21	1.07303e-21	-7.13221e-22	1.45151e-22	3.04674e-22	4.13858e-22	1.22775e-21	-8.34519e-22	-2.16415e-20	-1.8797e-20	1.42605e-20	-1.72222e-20	-6.55387e-22
-1.02721e-29	-3.19019e-29	-1.97189e-29	1.19355e-28	-1.23381e-28	7.23799e-29	4.08914e-29	5.75621e-27	5.90816e-27	3.34669e-26	-1.27421e-26	7.47564e-25	2.8963e-24	-1.31345e-25	-3.75791e-25	2.69731e-23	5.97869e-24	2.50023e-20	-1.73752e-19	-1.10389e-19	1.15404e-19	-6.95488e-19	-6.88766e-19	-5.32202e-19	1.49339e-18	1.30961e-17	6.42154e-18	-2.19361e-18	-6.58764e-18	-2.28234e-18	4.76387e-18	1.34976e-18	1.83575e-18	-1.258e-18	-2.10156e-17	7.92131e-19	7.31549e-18	-1.93178e-17	-1.9404e-17	1.28975e-17	-2.62483e-18	-5.50954e-18	-7.48397e-18	-2.22019e-17	1.50909e-17	3.91353e-16	3.39914e-16	-2.57879e-16	3.11435e-16	1.18516e-17
-1.02721e-29	-3.19019e-29	-1.97189e-29	1.19355e-28	-1.23381e-28	7.23799e-29	4.08914e-29	5.75621e-27	5.90816e-27	3.34669e-26	-1.27421e-26	7.47564e-25	2.8963e-24	-1.31345e-25	-3.75791e-25	2.69731e-23	5.97869e-24	2.50023e-20	-1.73752e-19	-1.10389e-19	1.15404e-19	-6.95488e-19	-6.88766e-19	-5.32202e-19	1.49339e-18	1.30961e-17	6.42154e-18	-2.19361e-18	-6.58764e-18	-2.28234e-18	4.76387e-18	1.34976e-18	1.83575e-18	-1.258e-18	-2.10156e-17	7.92131e-19	7.31549e-18	-1.93178e-17	-1.9404e-17	1.28975e-17	-2.62483e-18	-5.50954e-18	-7.48397e-18	-2.22019e-17	1.50909e-17	3.91353e-16	3.39914e-16	-2.57879e-16	3.11435e-16	1.18516e-17
-2.04037e-30	-6.31862e-30	-3.89507e-30	2.36204e-29	-2.44229e-29	1.42817e-29	8.0669e-30	1.13743e-27	1.16883e-27	6.61284e-27	-2.51842e-27	1.47705e-25	5.72289e-25	-2.5962e-26	-7.4252e-26	5.32962e-24	1.18136e-24	4.94021e-21	-3.43318e-20	-2.18119e-20	2.28028e-20	-1.37422e-19	-1.36093e-19	-1.05158e-19	2.95079e-19	2.58767e-18	1.26884e-18	-4.33436e-19	-1.30165e-18	-4.50967e-19	9.41294e-19	2.667e-19	3.62727e-19	-2.48569e-19	-4.15247e-18	1.56517e-19	1.44547e-18	-3.81702e-18	-3.83403e-18	2.54841e-18	-5.18641e-19	-1.08863e-18	-1.47876e-18	-4.38689e-18	2.98182e-18	7.73275e-17	6.71638e-17	-5.09544e-17	6.15366e-17	2.34177e-18
-7.88645e-34	-5.89437e-35	-2.20356e-34	-1.0236e-34	1.96181e-33	-3.46057e-33	9.29687e-34	-1.52358e-33	-1.61162e-32	-1.29411e-31	5.2339e-32	-9.32421e-31	5.8434e-31	5.11839e-31	1.88834e-30	-2.01074e-30	-5.32907e-30	2.93856e-29	-2.04555e-29	-4.54895e-29	-6.39697e-29	-2.91424e-29	-1.78344e-29	-2.85613e-29	8.44251e-29	-2.78269e-29	-8.6726e-29	3.78875e-29	3.89608e-29	-9.23053e-29	1.70363e-28	3.492e-28	2.37709e-28	3.18411e-28	3.91653e-28	2.44148e-28	-4.03695e-28	-5.91593e-28	2.03614e-28	-2.2845e-28	1.23176e-28	-2.48447e-28	7.88591e-29	-5.50311e-29	2.70338e-27	-5.17865e-28	-2.99085e-27	-4.19394e-27	-4.83452e-27	2.28132e-27
4.04509e-30	1.25401e-29	7.73753e-30	-4.68147e-29	4.84588e-29	-2.833e-29	-1.59847e-29	-2.25741e-27	-2.31957e-27	-1.31258e-26	4.99808e-27	-2.93166e-25	-1.13585e-24	5.15206e-26	1.47374e-25	-1.0578e-23	-2.34471e-24	-9.80512e-21	6.81402e-20	4.32913e-20	-4.52579e-20	2.72749e-19	2.70112e-19	2.08713e-19	-5.8566e-19	-5.13589e-18	-2.51833e-18	8.60265e-19	2.58347e-18	8.9506e-19	-1.86824e-18	-5.29335e-19	-7.19925e-19	4.93349e-19	8.24165e-18	-3.10649e-19	-2.86891e-18	7.57585e-18	7.60962e-18	-5.05798e-18	1.02938e-18	2.16067e-18	2.93498e-18	8.7069e-18	-5.91819e-18	-1.53476e-16	-1.33304e-16	1.01132e-16	-1.22135e-16	-4.64784e-18
-0.000138741	9.49289e-05	-0.000859251	-4.22101e-05	-0.000660548	0.000672674	6.28416e-05	-0.000446952	-0.0289923	-0.000618865	-0.379919	-0.00360227	-0.00122912	-0.000813	0.00161123	0.00574935	0.000446822	0.00263211	-0.0018075	0.00126672	-0.0218133	0.0173336	-0.0018265	-0.0270985	-0.0015831	-0.00245113	-0.0043226	-0.0228219	-0.0191233	0.046533	0.0316458	0.0526353	0.00345706	0.0257142	0.0172179	-0.00135387	0.0870183	-0.0196508	0.0378452	0.0123079	-0.0397596	-0.0039777	0.0207902	-0.0216605	0.00690346	0.0415147	-0.00240768	0.00661967	-0.0220682	-0.0478136
-5.08673e-30	-1.5786e-29	-9.7392e-30	5.9002e-29	-6.0984e-29	3.56275e-29	2.01457e-29	2.8401e-27	2.91755e-27	1.65115e-26	-6.29047e-27	3.6881e-25	1.42898e-24	-6.48153e-26	-1.854e-25	1.33079e-23	2.94981e-24	1.23355e-20	-8.57248e-20	-5.44632e-20	5.69374e-20	-3.43136e-19	-3.39819e-19	-2.62574e-19	7.36798e-19	6.46128e-18	3.16822e-18	-1.08227e-18	-3.25017e-18	-1.12604e-18	2.35037e-18	6.65937e-19	9.05713e-19	-6.20665e-19	-1.03685e-17	3.90816e-19	3.60927e-18	-9.5309e-18	-9.5734e-18	6.36327e-18	-1.29502e-18	-2.71826e-18	-3.69239e-18	-1.09538e-17	7.44547e-18	1.93083e-16	1.67705e-16	-1.27231e-16	1.53654e-16	5.84728e-18
-2.29784e-29	-7.12422e-29	-4.36495e-29	2.65986e-28	-2.7465e-28	1.61231e-28	9.08385e-29	1.2817e-26	1.31722e-26	7.45137e-26	-2.83677e-26	1.66436e-24	6.44868e-24	-2.92347e-25	-8.36667e-25	6.00561e-23	1.33115e-23	5.56678e-20	-3.86861e-19	-2.45783e-19	2.56948e-19	-1.54851e-18	-1.53354e-18	-1.18495e-18	3.32504e-18	2.91586e-17	1.42976e-17	-4.88408e-18	-1.46674e-17	-5.08163e-18	1.06068e-17	3.00526e-18	4.08732e-18	-2.80095e-18	-4.67913e-17	1.76368e-18	1.6288e-17	-4.30113e-17	-4.3203e-17	2.87163e-17	-5.8442e-18	-1.2267e-17	-1.66631e-17	-4.94327e-17	3.36001e-17	8.71349e-16	7.56821e-16	-5.74169e-16	6.93413e-16	2.63877e-17
3.27279e-30	1.01575e-29	6.2692e-30	-3.79792e-29	3.92469e-29	-2.30254e-29	-1.29918e-29	-1.83093e-27	-1.87908e-27	-1.0645e-26	4.05452e-27	-2.37785e-25	-9.21241e-25	4.17798e-26	1.19526e-25	-8.57939e-24	-1.90164e-24	-7.95254e-21	5.52658e-20	3.51118e-20	-3.67069e-20	2.21216e-19	2.19077e-19	1.69279e-19	-4.75006e-19	-4.16552e-18	-2.04251e-18	6.97726e-19	2.09535e-18	7.25948e-19	-1.51525e-18	-4.29322e-19	-5.83903e-19	4.00136e-19	6.68447e-18	-2.51955e-19	-2.32685e-18	6.14447e-18	6.17186e-18	-4.10233e-18	8.34886e-19	1.75243e-18	2.38044e-18	7.06182e-18	-4.80001e-18	-1.24478e-16	-1.08117e-16	8.20242e-17	-9.90589e-17	-3.76968e-18
7.53602e-29	2.34073e-28	1.44842e-28	-8.74368e-28	9.04803e-28	-5.30976e-28	-2.99272e-28	-4.22231e-26	-4.33563e-26	-2.45515e-25	9.34197e-26	-5.48314e-24	-2.12443e-23	9.6328e-25	2.75639e-24	-1.97846e-22	-4.38533e-23	-1.8339e-19	1.27446e-18	8.097e-19	-8.46483e-19	5.10136e-18	5.05205e-18	3.90367e-18	-1.09539e-17	-9.60593e-17	-4.71016e-17	1.609e-17	4.832e-17	1.67408e-17	-3.49427e-17	-9.90043e-18	-1.34652e-17	9.22737e-18	1.54148e-16	-5.81023e-18	-5.36587e-17	1.41695e-16	1.42327e-16	-9.46021e-17	1.9253e-17	4.04121e-17	5.48945e-17	1.6285e-16	-1.10691e-16	-2.87055e-15	-2.49325e-15	1.89153e-15	-2.28436e-15	-8.6931e-17
-4.79897e-29	-1.48798e-28	-9.22886e-29	5.56871e-28	-5.76058e-28	3.37333e-28	1.90751e-28	2.68546e-26	2.757e-26	1.56121e-25	-5.94567e-26	3.48738e-24	1.35116e-23	-6.12855e-25	-1.75305e-24	1.25831e-22	2.78915e-23	1.16637e-19	-8.10565e-19	-5.14974e-19	5.38368e-19	-3.24449e-18	-3.21313e-18	-2.48275e-18	6.96675e-18	6.10942e-17	2.99569e-17	-1.02333e-17	-3.07317e-17	-1.06472e-17	2.22237e-17	6.29673e-18	8.56391e-18	-5.86866e-18	-9.80389e-17	3.69534e-18	3.41272e-17	-9.01188e-17	-9.05206e-17	6.01674e-17	-1.2245e-17	-2.57023e-17	-3.49132e-17	-1.03573e-16	7.04001e-17	1.82568e-15	1.58572e-15	-1.20302e-15	1.45286e-15	5.52886e-17
-2.58668e-30	-8.02085e-30	-4.95422e-30	3.00333e-29	-3.10492e-29	1.82258e-29	1.02702e-29	1.44862e-27	1.48841e-27	8.42222e-27	-3.20481e-27	1.88125e-25	7.28878e-25	-3.30559e-26	-9.45667e-26	6.78797e-24	1.50459e-24	6.292e-21	-4.37259e-20	-2.77802e-20	2.90422e-20	-1.75024e-19	-1.73332e-19	-1.33932e-19	3.75821e-19	3.29573e-18	1.61602e-18	-5.52036e-19	-1.65782e-18	-5.74365e-19	1.19886e-18	3.39677e-19	4.6198e-19	-3.16585e-19	-5.28871e-18	1.99345e-19	1.84099e-18	-4.86146e-18	-4.88313e-18	3.24573e-18	-6.60556e-19	-1.38651e-18	-1.88339e-18	-5.58726e-18	3.79773e-18	9.84865e-17	8.55416e-17	-6.4897e-17	7.83748e-17	2.98254e-18
-4.69599e-31	-1.45949e-30	-9.00051e-31	5.45991e-30	-5.64229e-30	3.31639e-30	1.87258e-30	2.63328e-28	2.70299e-28	1.53085e-27	-5.8281e-28	3.41967e-26	1.32492e-25	-6.00665e-27	-1.71906e-26	1.23391e-24	2.73492e-25	1.14374e-21	-7.94839e-21	-5.04982e-21	5.27922e-21	-3.18154e-20	-3.15079e-20	-2.43458e-20	6.83158e-20	5.99089e-19	2.93757e-19	-1.00348e-19	-3.01355e-19	-1.04407e-19	2.17925e-19	6.17456e-20	8.39775e-20	-5.75479e-20	-9.61367e-19	3.62364e-20	3.34651e-19	-8.83703e-19	-8.87643e-19	5.90001e-19	-1.20074e-19	-2.52036e-19	-3.42358e-19	-1.01564e-18	6.90342e-19	1.79026e-17	1.55495e-17	-1.17968e-17	1.42468e-17	5.42159e-19
7.39528e-30	2.29399e-29	1.40946e-29	-8.57462e-29	8.86174e-29	-5.2036e-29	-2.92462e-29	-4.13358e-27	-4.25072e-27	-2.40335e-26	9.14914e-27	-5.36822e-25	-2.07975e-24	9.43156e-26	2.6984e-25	-1.93688e-23	-4.29315e-24	-1.79535e-20	1.24767e-19	7.92676e-20	-8.28686e-20	4.99411e-19	4.94583e-19	3.82159e-19	-1.07236e-18	-9.40397e-18	-4.61113e-18	1.57517e-18	4.7304e-18	1.63888e-18	-3.4208e-18	-9.69227e-19	-1.3182e-18	9.03337e-19	1.50907e-17	-5.68807e-19	-5.25305e-18	1.38716e-17	1.39334e-17	-9.26131e-18	1.88482e-18	3.95625e-18	5.37403e-18	1.59426e-17	-1.08364e-17	-2.81019e-16	-2.44083e-16	1.85176e-16	-2.23633e-16	-8.51033e-18
3.85143e-29	1.19553e-28	7.38994e-29	-4.46993e-28	4.62367e-28	-2.70744e-28	-1.52647e-28	-2.15546e-26	-2.21445e-26	-1.25322e-25	4.7706e-26	-2.79926e-24	-1.08455e-23	4.91875e-25	1.40716e-24	-1.01003e-22	-2.23879e-23	-9.36231e-20	6.50629e-19	4.13362e-19	-4.3214e-19	2.60431e-18	2.57914e-18	1.99287e-18	-5.59211e-18	-4.90395e-17	-2.4046e-17	8.21414e-18	2.46679e-17	8.54638e-18	-1.78387e-17	-5.05429e-18	-6.87413e-18	4.71069e-18	7.86944e-17	-2.9662e-18	-2.73934e-17	7.23371e-17	7.26596e-17	-4.82956e-17	9.82889e-18	2.06309e-17	2.80243e-17	8.31369e-17	-5.65092e-17	-1.46545e-15	-1.27284e-15	9.65648e-16	-1.16619e-15	-4.43794e-17
-2.58668e-30	-8.02085e-30	-4.95422e-30	3.00333e-29	-3.10492e-29	1.82258e-29	1.02702e-29	1.44862e-27	1.48841e-27	8.42222e-27	-3.20481e-27	1.88125e-25	7.28878e-25	-3.30559e-26	-9.45667e-26	6.78797e-24	1.50459e-24	6.292e-21	-4.37259e-20	-2.77802e-20	2.90422e-20	-1.75024e-19	-1.73332e-19	-1.33932e-19	3.75821e-19	3.29573e-18	1.61602e-18	-5.52036e-19	-1.65782e-18	-5.74365e-19	1.19886e-18	3.39677e-19	4.6198e-19	-3.16585e-19	-5.28871e-18	1.99345e-19	1.84099e-18	-4.86146e-18	-4.88313e-18	3.24573e-18	-6.60556e-19	-1.38651e-18	-1.88339e-18	-5.58726e-18	3.79773e-18	9.84865e-17	8.55416e-17	-6.4897e-17	7.83748e-17	2.98254e-18
1.14153e-06	-1.26223e-05	-2.77661e-05	-5.55183e-05	1.46649e-05	-2.17919e-05	1.10924e-05	-6.55724e-05	-0.000762906	-7.6862e-05	7.88628e-06	-0.00490367	-0.025761	-0.0118996	-0.0157283	0.0345126	-0.497677	0.00326116	-0.00388013	0.00111755	0.00144472	-2.85177e-05	-0.000151267	0.000535918	0.00250501	-0.000369172	-0.000519769	3.95488e-05	-0.000498804	-0.000120622	-6.65281e-05	0.000277743	5.82908e-05	0.000659264	0.000119244	-0.000201695	0.000134805	-0.000688226	-0.000203975	-7.89763e-05	0.000247978	-0.000237468	-0.000440777	0.000142655	-5.24053e-06	-0.000195643	-0.00169814	-1.78866e-05	-0.00131251	-0.000582204
-1.65973e-29	-5.15864e-29	-3.23019e-29	1.93203e-28	-2.00197e-28	1.16615e-28	6.59555e-29	9.31398e-27	9.57144e-27	5.41594e-26	-2.06316e-26	1.20954e-24	4.68652e-24	-2.1261e-25	-6.08037e-25	4.36444e-23	9.67443e-24	4.04555e-20	-2.81144e-19	-1.78618e-19	1.86732e-19	-1.12535e-18	-1.11447e-18	-8.61141e-19	2.41641e-18	2.11905e-17	1.03905e-17	-3.54942e-18	-1.06593e-17	-3.69298e-18	7.70828e-18	2.18401e-18	2.97038e-18	-2.03554e-18	-3.40047e-17	1.28172e-18	1.1837e-17	-3.12576e-17	-3.1397e-17	2.0869e-17	-4.24717e-18	-8.91483e-18	-1.21096e-17	-3.59243e-17	2.44182e-17	6.33237e-16	5.50006e-16	-4.17267e-16	5.03925e-16	1.91768e-17
2.26826e-29	7.03871e-29	4.37871e-29	-2.6373e-28	2.72798e-28	-1.59943e-28	-9.05025e-29	-1.27198e-26	-1.30537e-26	-7.3943e-26	2.81606e-26	-1.65178e-24	-6.39983e-24	2.90227e-25	8.30375e-25	-5.96008e-23	-1.32107e-23	-5.52461e-20	3.8393e-19	2.43921e-19	-2.55002e-19	1.53678e-18	1.52192e-18	1.17597e-18	-3.29985e-18	-2.89377e-17	-1.41893e-17	4.84708e-18	1.45563e-17	5.04314e-18	-1.05264e-17	-2.98249e-18	-4.05635e-18	2.77973e-18	4.64368e-17	-1.75032e-18	-1.61646e-17	4.26854e-17	4.28757e-17	-2.84987e-17	5.79993e-18	1.21741e-17	1.65369e-17	4.90582e-17	-3.33455e-17	-8.64748e-16	-7.51087e-16	5.69819e-16	-6.8816e-16	-2.61878e-17
-0.00609092	0.0732109	-0.400569	0.0061146	0.0271308	0.00161482	-0.00444697	-0.00409319	0.00084244	-0.000732472	0.000812967	4.58888e-05	0.000288028	0.000131288	-9.96538e-05	0.000284001	0.000295819	0.000182247	0.00310872	-0.00965079	0.00133113	0.00481709	-0.00224233	-0.00682715	-0.0111183	-0.00538162	-0.0611908	0.124798	-0.238173	-0.0713215	0.0225147	-0.0133199	-0.00267937	0.004024	0.0222879	-0.0161694	0.00170799	-0.0179428	-0.00467028	-0.000215138	-0.00130819	-0.00600137	-0.00345356	-0.000958438	-0.000729028	0.000735717	0.000189675	-0.001294	0.00154024	0.000219888
-7.91848e-34	-2.85985e-35	-2.22984e-34	-7.74373e-35	1.91694e-33	-3.52425e-33	9.31203e-34	-1.53059e-33	-1.76662e-32	-1.29677e-31	5.11381e-32	-9.27502e-31	6.04157e-31	5.46037e-31	1.84179e-30	-1.96302e-30	-5.27677e-30	3.05784e-29	-2.03577e-29	-4.60261e-29	-6.58863e-29	-2.80161e-29	-1.81959e-29	-3.17591e-29	8.68982e-29	-2.86518e-29	-8.75161e-29	2.69378e-29	4.61229e-29	-8.46099e-29	1.7702e-28	3.39964e-28	2.3114e-28	3.07882e-28	3.95155e-28	2.72677e-28	-3.99514e-28	-5.85316e-28	1.77448e-28	-2.22746e-28	9.86367e-29	-2.47958e-28	8.65089e-29	-5.22312e-29	2.68917e-27	-5.94746e-28	-2.8451e-27	-4.11227e-27	-4.81649e-27	2.57783e-27
6.24517e-29	1.937e-28	1.1928e-28	-7.2306e-28	7.47667e-28	-4.36918e-28	-2.46961e-28	-3.48439e-26	-3.5812e-26	-2.02596e-25	7.71459e-26	-4.52474e-24	-1.75316e-23	7.95127e-25	2.27462e-24	-1.63268e-22	-3.61896e-23	-1.51339e-19	1.05173e-18	6.68189e-19	-6.98543e-19	4.2098e-18	4.16911e-18	3.22142e-18	-9.0395e-18	-7.9271e-17	-3.88697e-17	1.32779e-17	3.98751e-17	1.3815e-17	-2.88357e-17	-8.17013e-18	-1.11118e-17	7.6147e-18	1.27207e-16	-4.79478e-18	-4.42808e-17	1.16931e-16	1.17452e-16	-7.80685e-17	1.58881e-17	3.33493e-17	4.53006e-17	1.34389e-16	-9.13456e-17	-2.36886e-15	-2.0575e-15	1.56094e-15	-1.88512e-15	-7.17381e-17
-1.98355e-30	-6.15794e-30	-3.80247e-30	2.30371e-29	-2.38133e-29	1.39339e-29	7.88976e-30	1.10966e-27	1.14015e-27	6.45082e-27	-2.45745e-27	1.44109e-25	5.58331e-25	-2.53255e-26	-7.24429e-26	5.19965e-24	1.15253e-24	4.81972e-21	-3.34944e-20	-2.12799e-20	2.22466e-20	-1.3407e-19	-1.32774e-19	-1.02593e-19	2.87882e-19	2.52455e-18	1.23789e-18	-4.22864e-19	-1.26991e-18	-4.39968e-19	9.18336e-19	2.60195e-19	3.5388e-19	-2.42507e-19	-4.05119e-18	1.527e-19	1.41022e-18	-3.72392e-18	-3.74052e-18	2.48626e-18	-5.05992e-19	-1.06208e-18	-1.44269e-18	-4.27989e-18	2.9091e-18	7.54415e-17	6.55256e-17	-4.97116e-17	6.00357e-17	2.28465e-18
3.39004e-29	1.05281e-28	6.48008e-29	-3.93949e-28	4.06901e-28	-2.39765e-28	-1.35092e-28	-1.90028e-26	-1.95053e-26	-1.10468e-25	4.20608e-26	-2.46783e-24	-9.56126e-24	4.33433e-25	1.24059e-24	-8.90451e-23	-1.97361e-23	-8.25377e-20	5.73592e-19	3.64418e-19	-3.80973e-19	2.29595e-18	2.27376e-18	1.75691e-18	-4.92998e-18	-4.3233e-17	-2.11988e-17	7.24155e-18	2.17472e-17	7.53446e-18	-1.57265e-17	-4.45584e-18	-6.0602e-18	4.15292e-18	6.93767e-17	-2.61499e-18	-2.41499e-17	6.37721e-17	6.40564e-17	-4.25772e-17	8.66511e-18	1.81881e-17	2.47061e-17	7.32931e-17	-4.98183e-17	-1.29194e-15	-1.12213e-15	8.51311e-16	-1.02811e-15	-3.91247e-17
-2.58668e-30	-8.02085e-30	-4.95422e-30	3.00333e-29	-3.10492e-29	1.82258e-29	1.02702e-29	1.44862e-27	1.48841e-27	8.42222e-27	-3.20481e-27	1.88125e-25	7.28878e-25	-3.30559e-26	-9.45667e-26	6.78797e-24	1.50459e-24	6.292e-21	-4.37259e-20	-2.77802e-20	2.90422e-20	-1.75024e-19	-1.73332e-19	-1.33932e-19	3.75821e-19	3.29573e-18	1.61602e-18	-5.52036e-19	-1.65782e-18	-5.74365e-19	1.19886e-18	3.39677e-19	4.6198e-19	-3.16585e-19	-5.28871e-18	1.99345e-19	1.84099e-18	-4.86146e-18	-4.88313e-18	3.24573e-18	-6.60556e-19	-1.38651e-18	-1.88339e-18	-5.58726e-18	3.79773e-18	9.84865e-17	8.55416e-17	-6.4897e-17	7.83748e-17	2.98254e-18
0.00425117	-0.0110901	-0.0214338	0.484591	-0.369046	-0.0166039	0.197843	-0.0471276	-0.00108367	-0.00119906	0.00369365	0.0954131	0.211933	0.175873	0.0297351	-0.012932	-0.0177798	-0.00444131	0.00319893	-0.00108173	0.0164722	-0.0116276	-0.000979763	0.0174448	-0.00747057	-0.00910334	-0.00771065	-0.0544605	-0.0045889	-0.0223358	-0.00710007	0.0421384	0.00503298	0.152081	-0.0601055	-0.0379641	-0.0975088	-0.375503	0.356192	0.147705	0.366868	0.0893007	-0.145865	-0.048587	-0.014751	-0.00146554	-0.0135091	0.00261655	0.00557367	0.00273318
-1.23987e-29	-3.84885e-29	-2.37944e-29	1.43885e-28	-1.48909e-28	8.69692e-29	4.90104e-29	6.9285e-27	7.12642e-27	4.02841e-26	-1.53509e-26	8.997e-25	3.48607e-24	-1.58114e-25	-4.52319e-25	3.24653e-23	7.19612e-24	3.00931e-20	-2.09131e-19	-1.32866e-19	1.38902e-19	-8.371e-19	-8.29008e-19	-6.40566e-19	1.79746e-18	1.57627e-17	7.72906e-18	-2.64026e-18	-7.92898e-18	-2.74705e-18	5.73386e-18	1.62459e-18	2.20954e-18	-1.51415e-18	-2.52946e-17	9.5342e-19	8.80503e-18	-2.32512e-17	-2.33549e-17	1.55236e-17	-3.15928e-18	-6.63136e-18	-9.00781e-18	-2.67226e-17	1.81637e-17	4.71038e-16	4.09126e-16	-3.10387e-16	3.74848e-16	1.42648e-17
-4.1366e-29	-1.28259e-28	-7.9175e-29	4.79853e-28	-4.95918e-28	2.91831e-28	1.64921e-28	2.31647e-26	2.3754e-26	1.34664e-25	-5.1249e-26	3.00814e-24	1.16551e-23	-5.28411e-25	-1.51219e-24	1.08544e-22	2.40581e-23	1.00612e-19	-6.99196e-19	-4.44218e-19	4.64398e-19	-2.79871e-18	-2.77166e-18	-2.14163e-18	6.00954e-18	5.27001e-17	2.58409e-17	-8.8273e-18	-2.65093e-17	-9.18434e-18	1.91703e-17	5.43158e-18	7.38725e-18	-5.06232e-18	-8.45687e-17	3.18761e-18	2.94382e-17	-7.77368e-17	-7.80834e-17	5.19006e-17	-1.05626e-17	-2.21709e-17	-3.01162e-17	-8.93427e-17	6.07274e-17	1.57484e-15	1.36785e-15	-1.03773e-15	1.25325e-15	4.76921e-17
-1.23987e-29	-3.84885e-29	-2.37944e-29	1.43885e-28	-1.48909e-28	8.69692e-29	4.90104e-29	6.9285e-27	7.12642e-27	4.02841e-26	-1.53509e-26	8.997e-25	3.48607e-24	-1.58114e-25	-4.52319e-25	3.24653e-23	7.19612e-24	3.00931e-20	-2.09131e-19	-1.32866e-19	1.38902e-19	-8.371e-19	-8.29008e-19	-6.40566e-19	1.79746e-18	1.57627e-17	7.72906e-18	-2.64026e-18	-7.92898e-18	-2.74705e-18	5.73386e-18	1.62459e-18	2.20954e-18	-1.51415e-18	-2.52946e-17	9.5342e-19	8.80503e-18	-2.32512e-17	-2.33549e-17	1.55236e-17	-3.15928e-18	-6.63136e-18	-9.00781e-18	-2.67226e-17	1.81637e-17	4.71038e-16	4.09126e-16	-3.10387e-16	3.74848e-16	1.42648e-17
-6.16684e-29	-1.91422e-28	-1.17721e-28	7.14882e-28	-7.38437e-28	4.33255e-28	2.44568e-28	3.44548e-26	3.5363e-26	2.00307e-25	-7.62763e-26	4.47455e-24	1.7336e-23	-7.86e-25	-2.24933e-24	1.61449e-22	3.57855e-23	1.49652e-19	-1.04e-18	-6.60741e-19	6.90757e-19	-4.16287e-18	-4.12264e-18	-3.18552e-18	8.93874e-18	7.83874e-17	3.84364e-17	-1.31299e-17	-3.94306e-17	-1.3661e-17	2.85143e-17	8.07906e-18	1.0988e-17	-7.52983e-18	-1.2579e-16	4.74133e-18	4.37872e-17	-1.15628e-16	-1.16143e-16	7.71983e-17	-1.5711e-17	-3.29776e-17	-4.47956e-17	-1.32891e-16	9.03274e-17	2.34246e-15	2.03457e-15	-1.54355e-15	1.86411e-15	7.09385e-17
-1.23417e-05	-8.49034e-06	-7.14387e-05	2.15761e-05	2.62675e-05	0.000123903	0.000283854	-0.000515772	-0.000200857	-0.00240101	-0.00284667	-0.0676595	0.493555	-0.369154	-0.0189962	-0.0376686	-0.0181284	0.0014218	-0.00307039	0.00106392	-0.00546691	0.00268112	-0.000946329	-0.00899446	-0.000311607	0.00686918	0.000735566	0.0210036	0.0127338	0.0124189	-0.00209152	-0.0465196	0.00133912	0.0098251	0.0490897	-0.0764965	0.0565095	0.0329154	-0.0848033	0.0278955	0.127813	0.0667441	0.251671	0.0705663	0.0180339	0.00250901	0.00142815	0.000699771	-0.002667	0.00503681
-1.52707e-33	-1.74693e-34	-3.26596e-34	-3.5844e-34	3.9239e-33	-7.19152e-33	2.51126e-33	-2.68283e-33	-3.66584e-32	-2.51898e-31	1.01042e-31	-1.91876e-30	1.12333e-30	1.10641e-30	3.75882e-30	-3.86982e-30	-1.09377e-29	6.07158e-29	-4.44217e-29	-9.5366e-29	-1.23255e-28	-4.155e-29	-3.43878e-29	-6.35459e-29	1.69658e-28	-5.17766e-29	-1.66088e-28	3.67868e-29	9.41802e-29	-1.76025e-28	3.4415e-28	6.6645e-28	4.76596e-28	6.58135e-28	8.05347e-28	5.41075e-28	-7.17021e-28	-1.17304e-27	3.73612e-28	-4.48191e-28	1.9426e-28	-3.9908e-28	1.98139e-28	-1.26992e-28	4.86712e-27	-1.61684e-27	-5.76998e-27	-7.85972e-27	-9.416e-27	4.10266e-27
1.20303e-09	6.66354e-09	-2.18148e-09	-3.37276e-09	-8.44245e-10	-2.38553e-09	5.27669e-09	-1.74136e-08	-6.37177e-09	2.47323e-07	6.86264e-08	5.54021e-07	-3.29116e-06	-1.86257e-06	1.38548e-06	3.19856e-07	3.19303e-06	-4.64118e-05	4.09773e-05	-1.00955e-05	2.9498e-05	-1.9358e-05	-0.000220653	-0.000100779	0.000860747	0.00016852	-0.000406446	-0.00027467	-0.000647626	0.00106463	-0.00265052	0.00110259	0.00145418	-0.000810987	0.000422009	-0.000212342	-0.000330516	-0.00253437	-0.000474824	-0.00214558	-0.00294951	0.00179755	0.000436508	0.00064828	-0.0293373	0.00355145	-0.00428427	0.00317322	0.00553873	-0.00571918
-2.58668e-30	-8.02085e-30	-4.95422e-30	3.00333e-29	-3.10492e-29	1.82258e-29	1.02702e-29	1.44862e-27	1.48841e-27	8.42222e-27	-3.20481e-27	1.88125e-25	7.28878e-25	-3.30559e-26	-9.45667e-26	6.78797e-24	1.50459e-24	6.292e-21	-4.37259e-20	-2.77802e-20	2.90422e-20	-1.75024e-19	-1.73332e-19	-1.33932e-19	3.75821e-19	3.29573e-18	1.61602e-18	-5.52036e-19	-1.65782e-18	-5.74365e-19	1.19886e-18	3.39677e-19	4.6198e-19	-3.16585e-19	-5.28871e-18	1.99345e-19	1.84099e-18	-4.86146e-18	-4.88313e-18	3.24573e-18	-6.60556e-19	-1.38651e-18	-1.88339e-18	-5.58726e-18	3.79773e-18	9.84865e-17	8.55416e-17	-6.4897e-17	7.83748e-17	2.98254e-18
2.85949e-29	8.86618e-29	5.48124e-29	-3.31791e-28	3.43024e-28	-2.00835e-28	-1.13406e-28	-1.59802e-26	-1.64101e-26	-9.28997e-26	3.53927e-26	-2.07507e-24	-8.03998e-24	3.64644e-25	1.04319e-24	-7.48747e-23	-1.65963e-23	-6.9404e-20	4.8232e-19	3.06431e-19	-3.20351e-19	1.93061e-18	1.91195e-18	1.47734e-18	-4.1455e-18	-3.63536e-17	-1.78256e-17	6.08925e-18	1.82867e-17	6.33554e-18	-1.3224e-17	-3.74681e-18	-5.09588e-18	3.49209e-18	5.83372e-17	-2.19888e-18	-2.03071e-17	5.36244e-17	5.38635e-17	-3.58021e-17	7.28628e-18	1.52939e-17	2.07748e-17	6.16304e-17	-4.1891e-17	-1.08636e-15	-9.43569e-16	7.15847e-16	-8.64514e-16	-3.2899e-17
4.05168e-30	1.25547e-29	7.72148e-30	-4.68275e-29	4.84519e-29	-2.83291e-29	-1.5984e-29	-2.25741e-27	-2.3198e-27	-1.31262e-26	4.99806e-27	-2.93168e-25	-1.13585e-24	5.15216e-26	1.47371e-25	-1.0578e-23	-2.3447e-24	-9.80512e-21	6.81402e-20	4.32913e-20	-4.52579e-20	2.72749e-19	2.70112e-19	2.08713e-19	-5.8566e-19	-5.13589e-18	-2.51833e-18	8.60265e-19	2.58347e-18	8.9506e-19	-1.86824e-18	-5.29335e-19	-7.19926e-19	4.93349e-19	8.24165e-18	-3.10649e-19	-2.86891e-18	7.57585e-18	7.60962e-18	-5.05798e-18	1.02938e-18	2.16067e-18	2.93498e-18	8.7069e-18	-5.91819e-18	-1.53476e-16	-1.33304e-16	1.01132e-16	-1.22135e-16	-4.64784e-18
7.11463e-29	2.20761e-28	1.36485e-28	-8.25596e-28	8.54065e-28	-5.00986e-28	-2.82249e-28	-3.9837e-26	-4.09127e-26	-2.3163e-25	8.81632e-26	-5.17319e-24	-2.00439e-23	9.08982e-25	2.60056e-24	-1.86667e-22	-4.13756e-23	-1.73028e-19	1.20245e-18	7.63948e-19	-7.98653e-19	4.81311e-18	4.76659e-18	3.68309e-18	-1.0335e-17	-9.06315e-17	-4.44402e-17	1.51808e-17	4.55897e-17	1.57949e-17	-3.29682e-17	-9.34101e-18	-1.27043e-17	8.70598e-18	1.45438e-16	-5.48193e-18	-5.06267e-17	1.33689e-16	1.34285e-16	-8.92567e-17	1.81651e-17	3.81287e-17	5.17927e-17	1.53648e-16	-1.04437e-16	-2.70835e-15	-2.35237e-15	1.78465e-15	-2.15528e-15	-8.2019e-17
-1.52495e-33	-1.74451e-34	-3.26143e-34	-3.57943e-34	3.91845e-33	-7.18153e-33	2.50777e-33	-2.67911e-33	-3.66075e-32	-2.51548e-31	1.00902e-31	-1.91609e-30	1.12177e-30	1.10488e-30	3.7536e-30	-3.86445e-30	-1.09225e-29	6.06315e-29	-4.436e-29	-9.52336e-29	-1.23084e-28	-4.14923e-29	-3.434e-29	-6.34577e-29	1.69422e-28	-5.17047e-29	-1.65857e-28	3.67357e-29	9.40494e-29	-1.7578e-28	3.43672e-28	6.65525e-28	4.75935e-28	6.57221e-28	8.04229e-28	5.40324e-28	-7.16025e-28	-1.17141e-27	3.73093e-28	-4.47569e-28	1.9399e-28	-3.98526e-28	1.97864e-28	-1.26816e-28	4.86036e-27	-1.61459e-27	-5.76197e-27	-7.8488e-27	-9.40292e-27	4.09697e-27
-2.58668e-30	-8.02085e-30	-4.95422e-30	3.00333e-29	-3.10492e-29	1.82258e-29	1.02702e-29	1.44862e-27	1.48841e-27	8.42222e-27	-3.20481e-27	1.88125e-25	7.28878e-25	-3.30559e-26	-9.45667e-26	6.78797e-24	1.50459e-24	6.292e-21	-4.37259e-20	-2.77802e-20	2.90422e-20	-1.75024e-19	-1.73332e-19	-1.33932e-19	3.75821e-19	3.29573e-18	1.61602e-18	-5.52036e-19	-1.65782e-18	-5.74365e-19	1.19886e-18	3.39677e-19	4.6198e-19	-3.16585e-19	-5.28871e-18	1.99345e-19	1.84099e-18	-4.86146e-18	-4.88313e-18	3.24573e-18	-6.60556e-19	-1.38651e-18	-1.88339e-18	-5.58726e-18	3.79773e-18	9.84865e-17	8.55416e-17	-6.4897e-17	7.83748e-17	2.98254e-18
6.46689e-32	3.55487e-31	-2.80655e-31	1.81355e-30	-1.11516e-30	-2.35432e-31	7.55663e-31	-9.41656e-31	-2.12192e-29	2.95277e-29	3.77404e-29	-8.74433e-28	-8.18605e-29	-4.23808e-28	9.22435e-28	7.73395e-28	5.73295e-28	3.27185e-27	-6.20688e-27	-7.832e-27	-2.22413e-27	2.2019e-26	3.77887e-27	-2.77595e-27	-2.93906e-26	3.47604e-26	-8.61208e-27	-1.14092e-25	1.83815e-25	9.142e-26	-1.99209e-25	9.82769e-26	-3.2712e-26	4.31811e-25	3.66413e-26	2.27939e-25	-1.33503e-26	3.62428e-25	1.23301e-25	2.14753e-25	2.82913e-25	-8.81035e-26	-9.09808e-26	8.17288e-26	-3.1037e-25	3.00885e-25	1.77977e-24	1.68628e-24	-5.0373e-24	-4.9417e-25
-2.69899e-35	1.168e-35	-9.92764e-35	2.44053e-34	-1.70736e-34	1.2936e-35	8.03873e-35	-1.88775e-34	3.01124e-33	2.99612e-33	-1.08746e-32	5.8264e-32	2.98056e-32	1.12552e-32	-4.27972e-32	-2.35364e-31	-2.69902e-31	1.29799e-30	1.49606e-30	6.80963e-30	-8.43933e-30	6.14899e-31	-5.74757e-30	-4.42449e-30	6.90232e-30	-3.60415e-30	-1.18334e-29	4.97475e-30	-7.78884e-30	-7.52661e-30	1.75443e-29	-2.59398e-29	3.31238e-29	1.51632e-30	1.99238e-29	1.06993e-29	-1.26312e-29	-2.70489e-29	3.22806e-29	2.03312e-29	5.24725e-29	-2.42733e-29	-2.0514e-29	1.05583e-29	2.38542e-28	1.77586e-28	-1.32553e-29	-2.025e-28	-5.2788e-28	2.42141e-28
8.48902e-33	-9.21019e-33	-7.58053e-33	-1.3586e-32	6.07194e-32	8.43309e-32	4.44798e-32	-1.48158e-32	4.82598e-31	1.26662e-30	1.26855e-30	-1.15122e-29	1.2851e-29	1.03329e-30	1.14035e-30	-9.51213e-29	-7.65578e-29	-1.96154e-27	-6.00739e-28	3.87412e-28	1.56885e-27	-1.05503e-27	1.92634e-27	-3.41865e-27	1.0633e-27	-6.32474e-28	8.05181e-28	-1.60734e-27	-6.5306e-27	3.07646e-27	-3.98556e-27	-1.55237e-26	4.7938e-27	-9.14176e-27	4.94784e-27	1.24934e-26	-3.47905e-26	-1.00064e-26	-8.33298e-27	-1.10512e-26	1.6909e-26	-1.13064e-26	-5.34166e-27	7.82136e-28	-3.03956e-26	-1.29692e-25	1.91072e-25	3.49963e-26	-1.57042e-26	-1.71407e-26
-2.58668e-30	-8.02085e-30	-4.95422e-30	3.00333e-29	-3.10492e-29	1.82258e-29	1.02702e-29	1.44862e-27	1.48841e-27	8.42222e-27	-3.20481e-27	1.88125e-25	7.28878e-25	-3.30559e-26	-9.45667e-26	6.78797e-24	1.50459e-24	6.292e-21	-4.37259e-20	-2.77802e-20	2.90422e-20	-1.75024e-19	-1.73332e-19	-1.33932e-19	3.75821e-19	3.29573e-18	1.61602e-18	-5.52036e-19	-1.65782e-18	-5.74365e-19	1.19886e-18	3.39677e-19	4.6198e-19	-3.16585e-19	-5.28871e-18	1.99345e-19	1.84099e-18	-4.86146e-18	-4.88313e-18	3.24573e-18	-6.60556e-19	-1.38651e-18	-1.88339e-18	-5.58726e-18	3.79773e-18	9.84865e-17	8.55416e-17	-6.4897e-17	7.83748e-17	2.98254e-18
-2.58668e-30	-8.02085e-30	-4.95422e-30	3.00333e-29	-3.10492e-29	1.82258e-29	1.02702e-29	1.44862e-27	1.48841e-27	8.42222e-27	-3.20481e-27	1.88125e-25	7.28878e-25	-3.30559e-26	-9.45667e-26	6.78797e-24	1.50459e-24	6.292e-21	-4.37259e-20	-2.77802e-20	2.90422e-20	-1.75024e-19	-1.73332e-19	-1.33932e-19	3.75821e-19	3.29573e-18	1.61602e-18	-5.52036e-19	-1.65782e-18	-5.74365e-19	1.19886e-18	3.39677e-19	4.6198e-19	-3.16585e-19	-5.28871e-18	1.99345e-19	1.84099e-18	-4.86146e-18	-4.88313e-18	3.24573e-18	-6.60556e-19	-1.38651e-18	-1.88339e-18	-5.58726e-18	3.79773e-18	9.84865e-17	8.55416e-17	-6.4897e-17	7.83748e-17	2.98254e-18
-5.38368e-33	2.17702e-33	-1.95355e-32	4.79443e-32	-3.41267e-32	2.67176e-33	1.59325e-32	-3.7531e-32	5.96597e-31	5.90365e-31	-2.14851e-30	1.15801e-29	5.96124e-30	2.18513e-30	-8.33915e-30	-4.62901e-29	-5.31776e-29	2.60674e-28	2.98374e-28	1.34944e-27	-1.66619e-27	1.17295e-28	-1.13459e-27	-8.79585e-28	1.33811e-27	-7.11742e-28	-2.328e-27	9.67163e-28	-1.56577e-27	-1.45021e-27	3.52238e-27	-5.10784e-27	6.56748e-27	4.0625e-28	3.95195e-27	2.07529e-27	-2.37347e-27	-5.39394e-27	6.43165e-27	4.06831e-27	1.0223e-26	-4.84503e-27	-4.1431e-27	2.27189e-27	4.69998e-26	3.53769e-26	-3.03998e-27	-4.10167e-26	-1.05199e-25	4.78951e-26
1.69127e-31	2.46971e-31	6.71367e-31	1.92877e-30	-1.49294e-30	-2.52709e-31	8.55798e-31	-7.5607e-31	1.77633e-29	4.09327e-29	-1.11666e-28	-8.86713e-29	-2.85955e-28	-9.98541e-28	9.01816e-29	2.40794e-28	8.85487e-28	-3.21193e-26	-1.91194e-26	-1.2861e-26	2.01202e-26	-1.31525e-26	2.61365e-26	-1.70946e-26	-7.75075e-26	2.8658e-26	-2.82705e-26	1.46243e-25	-7.76094e-26	-1.10755e-25	-1.33877e-25	2.2826e-25	4.4396e-25	2.19647e-25	-2.04357e-25	-9.54324e-25	2.93807e-25	1.08795e-25	7.9267e-25	2.85701e-25	8.21498e-25	6.4525e-26	-4.79579e-25	1.62535e-25	-3.7535e-26	1.57087e-25	-1.47254e-24	-1.56415e-24	1.57994e-24	6.41395e-24
0.000151977	0.000511183	0.000817897	0.000333949	-0.00155555	0.00137961	-0.000602306	-0.000519637	-0.000758249	-0.447101	0.000842065	-0.00268392	-0.00351747	-0.00154051	0.00471534	-0.000397746	0.000208563	0.000204179	-0.000834706	0.000800537	-0.000256041	-0.00116841	0.00226842	0.000166218	0.00227198	-0.000745595	-0.00187057	0.00377302	0.00212139	-3.80149e-05	0.0016323	-0.0071014	0.00954192	0.0278675	-0.0104886	-0.0182574	-0.0295502	0.0135869	-0.0302333	0.0245733	-0.012679	0.0511528	0.0374843	-0.204765	-0.0177219	-0.00429396	0.00961261	-0.00504854	-0.0154853	0.00727883
-2.32567e-33	-7.22187e-33	-4.47293e-33	2.70487e-32	-2.79653e-32	1.64343e-32	9.26144e-33	1.30544e-30	1.34083e-30	7.5898e-30	-2.88819e-30	1.69529e-28	6.56842e-28	-2.97809e-29	-8.5222e-29	6.11713e-27	1.35589e-27	5.67017e-24	-3.94046e-23	-2.50348e-23	2.61721e-23	-1.57727e-22	-1.56202e-22	-1.20696e-22	3.3868e-22	2.97002e-21	1.45632e-21	-4.9748e-22	-1.49399e-21	-5.17602e-22	1.08038e-21	3.06107e-22	4.16324e-22	-2.85297e-22	-4.76604e-21	1.79644e-22	1.65905e-21	-4.38101e-21	-4.40055e-21	2.92497e-21	-5.95275e-22	-1.24949e-21	-1.69726e-21	-5.03509e-21	3.42241e-21	8.87533e-20	7.70878e-20	-5.84834e-20	7.06292e-20	2.68779e-21
3.40043e-29	1.05498e-28	6.45132e-29	-3.94122e-28	4.06777e-28	-2.39818e-28	-1.35035e-28	-1.90028e-26	-1.95095e-26	-1.10473e-25	4.20636e-26	-2.46784e-24	-9.56125e-24	4.33429e-25	1.24058e-24	-8.90448e-23	-1.97361e-23	-8.25377e-20	5.73592e-19	3.64418e-19	-3.80973e-19	2.29595e-18	2.27376e-18	1.75691e-18	-4.92998e-18	-4.3233e-17	-2.11988e-17	7.24155e-18	2.17472e-17	7.53446e-18	-1.57265e-17	-4.45584e-18	-6.0602e-18	4.15292e-18	6.93767e-17	-2.61499e-18	-2.41499e-17	6.37721e-17	6.40564e-17	-4.25772e-17	8.66511e-18	1.81881e-17	2.47061e-17	7.32931e-17	-4.98183e-17	-1.29194e-15	-1.12213e-15	8.51311e-16	-1.02811e-15	-3.91247e-17
1.1217e-32	3.47941e-32	2.15405e-32	-1.29983e-31	1.34521e-31	-7.8517e-32	-4.43813e-32	-6.26473e-30	-6.4332e-30	-3.64283e-29	1.38719e-29	-8.1355e-28	-3.15218e-27	1.42977e-28	4.08966e-28	-2.93558e-26	-6.50706e-27	-2.7211e-23	1.89101e-22	1.20141e-22	-1.25599e-22	7.56926e-22	7.4961e-22	5.79215e-22	-1.62531e-21	-1.4253e-20	-6.98881e-21	2.38739e-21	7.16958e-21	2.48395e-21	-5.18469e-21	-1.469e-21	-1.99792e-21	1.36913e-21	2.2872e-20	-8.62106e-22	-7.96173e-21	2.10243e-20	2.11181e-20	-1.40368e-20	2.8567e-21	5.99624e-21	8.14509e-21	2.41632e-20	-1.6424e-20	-4.25924e-19	-3.69941e-19	2.80659e-19	-3.38947e-19	-1.28986e-20
-2.32567e-33	-7.22187e-33	-4.47293e-33	2.70487e-32	-2.79653e-32	1.64343e-32	9.26144e-33	1.30544e-30	1.34083e-30	7.5898e-30	-2.88819e-30	1.69529e-28	6.56842e-28	-2.97809e-29	-8.5222e-29	6.11713e-27	1.35589e-27	5.67017e-24	-3.94046e-23	-2.50348e-23	2.61721e-23	-1.57727e-22	-1.56202e-22	-1.20696e-22	3.3868e-22	2.97002e-21	1.45632e-21	-4.9748e-22	-1.49399e-21	-5.17602e-22	1.08038e-21	3.06107e-22	4.16324e-22	-2.85297e-22	-4.76604e-21	1.79644e-22	1.65905e-21	-4.38101e-21	-4.40055e-21	2.92497e-21	-5.95275e-22	-1.24949e-21	-1.69726e-21	-5.03509e-21	3.42241e-21	8.87533e-20	7.70878e-20	-5.84834e-20	7.06292e-20	2.68779e-21
-8.63303e-06	-7.31274e-05	-9.69762e-05	0.000110646	7.79977e-05	-0.000150974	0.000187233	8.0977e-05	0.00122332	0.00173083	0.00390163	-0.464635	0.0659483	0.171898	0.0061149	0.0125097	-0.00222506	-0.000218161	-0.0018898	0.000208831	0.000359989	-0.00245357	-0.000462553	-0.000372785	0.00108807	0.00538388	0.00102983	-0.00340943	0.0192	-0.0181224	0.0114545	-0.00667938	-0.000226166	0.0261621	0.0917659	-0.0282362	0.00309392	-0.0141283	-0.0283128	-0.0221138	0.0246411	-0.0596895	-0.024828	-0.0178897	-0.00936398	-0.0072868	0.00117157	-0.00103799	0.00283702	-0.0038885
-2.32567e-33	-7.22187e-33	-4.47293e-33	2.70487e-32	-2.79653e-32	1.64343e-32	9.26144e-33	1.30544e-30	1.34083e-30	7.5898e-30	-2.88819e-30	1.69529e-28	6.56842e-28	-2.97809e-29	-8.5222e-29	6.11713e-27	1.35589e-27	5.67017e-24	-3.94046e-23	-2.50348e-23	2.61721e-23	-1.57727e-22	-1.56202e-22	-1.20696e-22	3.3868e-22	2.97002e-21	1.45632e-21	-4.9748e-22	-1.49399e-21	-5.17602e-22	1.08038e-21	3.06107e-22	4.16324e-22	-2.85297e-22	-4.76604e-21	1.79644e-22	1.65905e-21	-4.38101e-21	-4.40055e-21	2.92497e-21	-5.95275e-22	-1.24949e-21	-1.69726e-21	-5.03509e-21	3.42241e-21	8.87533e-20	7.70878e-20	-5.84834e-20	7.06292e-20	2.68779e-21
-5.07374e-30	-1.57599e-29	-9.77655e-30	5.89815e-29	-6.09873e-29	3.56414e-29	2.01427e-29	2.8401e-27	2.91744e-27	1.65116e-26	-6.29078e-27	3.68813e-25	1.42897e-24	-6.48164e-26	-1.85399e-25	1.33078e-23	2.94981e-24	1.23355e-20	-8.57248e-20	-5.44632e-20	5.69374e-20	-3.43136e-19	-3.39819e-19	-2.62574e-19	7.36798e-19	6.46128e-18	3.16822e-18	-1.08227e-18	-3.25017e-18	-1.12604e-18	2.35037e-18	6.65937e-19	9.05713e-19	-6.20665e-19	-1.03685e-17	3.90816e-19	3.60927e-18	-9.5309e-18	-9.5734e-18	6.36327e-18	-1.29502e-18	-2.71826e-18	-3.69239e-18	-1.09538e-17	7.44547e-18	1.93083e-16	1.67705e-16	-1.27231e-16	1.53654e-16	5.84728e-18
-5.34735e-29	-1.65984e-28	-1.03132e-28	6.20934e-28	-6.42637e-28	3.76349e-28	2.12443e-28	2.99624e-26	3.07551e-26	1.74214e-25	-6.63201e-26	3.89098e-24	1.50747e-23	-6.83644e-25	-1.95587e-24	1.4039e-22	3.11184e-23	1.30132e-19	-9.0435e-19	-5.74557e-19	6.00658e-19	-3.61989e-18	-3.5849e-18	-2.77001e-18	7.77282e-18	6.8163e-17	3.3423e-17	-1.14173e-17	-3.42875e-17	-1.18791e-17	2.47951e-17	7.02527e-18	9.55477e-18	-6.54768e-18	-1.09382e-16	4.1229e-18	3.80758e-17	-1.00546e-16	-1.00994e-16	6.7129e-17	-1.36618e-17	-2.86762e-17	-3.89527e-17	-1.15557e-16	7.85456e-17	2.03692e-15	1.76919e-15	-1.34221e-15	1.62096e-15	6.16856e-17
-0.00016377	-9.62948e-05	-0.000996025	-0.00287817	0.00193282	-0.00122974	0.00501754	0.00315297	-0.498489	0.000849168	0.0380242	-9.1574e-05	0.00142237	0.00193693	-0.00239726	0.000424812	0.000748647	2.98401e-05	-1.58085e-05	-3.43122e-05	-4.1749e-05	4.19644e-05	-1.14028e-05	-8.054e-05	4.89629e-05	0.000100511	0.000108665	-5.21252e-05	4.14759e-05	-7.98146e-05	4.83503e-05	1.34011e-05	-0.00017701	-0.000243239	-0.000486873	0.000262244	-9.35005e-05	0.000216601	-0.000147441	0.00102676	0.00060509	-0.00118498	-0.000134496	-0.00100662	0.000391144	0.000286371	0.00131596	0.00238994	0.00160369	0.00105679
-5.48893e-29	-1.70375e-28	-1.05872e-28	6.37049e-28	-6.59647e-28	3.85162e-28	2.17319e-28	3.07109e-26	3.15351e-26	1.78562e-25	-6.80083e-26	3.98799e-24	1.54518e-23	-7.00773e-25	-2.0047e-24	1.439e-22	3.18965e-23	1.33386e-19	-9.26959e-19	-5.88921e-19	6.15674e-19	-3.71039e-18	-3.67452e-18	-2.83926e-18	7.96714e-18	6.98671e-17	3.42585e-17	-1.17028e-17	-3.51447e-17	-1.21761e-17	2.54149e-17	7.2009e-18	9.79364e-18	-6.71137e-18	-1.12117e-16	4.22597e-18	3.90277e-17	-1.03059e-16	-1.03519e-16	6.88072e-17	-1.40033e-17	-2.93931e-17	-3.99265e-17	-1.18446e-16	8.05092e-17	2.08784e-15	1.81342e-15	-1.37577e-15	1.66149e-15	6.32278e-17
7.07728e-34	2.19766e-33	1.36696e-33	-8.22316e-33	8.51403e-33	-4.96688e-33	-2.80725e-33	-3.96185e-31	-4.06968e-31	-2.30361e-30	8.77646e-31	-5.14543e-29	-1.99356e-28	9.04311e-30	2.58645e-29	-1.85655e-27	-4.11523e-28	-1.72091e-24	1.19594e-23	7.59811e-24	-7.94327e-24	4.78705e-23	4.74077e-23	3.66315e-23	-1.0279e-22	-9.01407e-22	-4.41995e-22	1.50986e-22	4.53427e-22	1.57093e-22	-3.27897e-22	-9.29042e-23	-1.26355e-22	8.65883e-23	1.4465e-21	-5.45224e-23	-5.03525e-22	1.32965e-21	1.33557e-21	-8.87733e-22	1.80667e-22	3.79222e-22	5.15122e-22	1.52816e-21	-1.03871e-21	-2.69368e-20	-2.33963e-20	1.77498e-20	-2.14361e-20	-8.15748e-22
1.69013e-31	2.46628e-31	6.71248e-31	1.92869e-30	-1.49348e-30	-2.5301e-31	8.54485e-31	-7.54684e-31	1.77639e-29	4.093e-29	-1.11662e-28	-8.83334e-29	-2.85877e-28	-9.98806e-28	9.02711e-29	2.40881e-28	8.84903e-28	-3.21367e-26	-1.90989e-26	-1.28507e-26	2.01091e-26	-1.31484e-26	2.6149e-26	-1.70619e-26	-7.74818e-26	2.87637e-26	-2.82115e-26	1.46196e-25	-7.75766e-26	-1.10696e-25	-1.3382e-25	2.28265e-25	4.43892e-25	2.19671e-25	-2.04366e-25	-9.54425e-25	2.9373e-25	1.08652e-25	7.92705e-25	2.8547e-25	8.21409e-25	6.52235e-26	-4.79739e-25	1.62659e-25	-3.72688e-26	1.55843e-25	-1.47148e-24	-1.56529e-24	1.58104e-24	6.41222e-24
1.14153e-06	-1.26223e-05	-2.77661e-05	-5.55183e-05	1.46649e-05	-2.17919e-05	1.10924e-05	-6.55724e-05	-0.000762906	-7.6862e-05	7.88628e-06	-0.00490367	-0.025761	-0.0118996	-0.0157283	0.0345126	-0.497677	0.00326116	-0.00388013	0.00111755	0.00144472	-2.85177e-05	-0.000151267	0.000535918	0.00250501	-0.000369172	-0.000519769	3.95488e-05	-0.000498804	-0.000120622	-6.65281e-05	0.000277743	5.82908e-05	0.000659264	0.000119244	-0.000201695	0.000134805	-0.000688226	-0.000203975	-7.89763e-05	0.000247978	-0.000237468	-0.000440777	0.000142655	-5.24053e-06	-0.000195643	-0.00169814	-1.78866e-05	-0.00131251	-0.000582204
3.26408e-27	1.01424e-26	6.27005e-27	-3.79067e-26	3.91849e-26	-2.29399e-26	-1.29538e-26	-1.8269e-24	-1.87764e-24	-1.06219e-23	4.04547e-24	-2.37247e-22	-9.19238e-22	4.16819e-23	1.19268e-22	-8.56066e-21	-1.89751e-21	-7.93519e-18	5.51452e-17	3.50352e-17	-3.66268e-17	2.20733e-16	2.18599e-16	1.68909e-16	-4.73969e-16	-4.15643e-15	-2.03806e-15	6.96204e-16	2.09077e-15	7.24364e-16	-1.51195e-15	-4.28386e-16	-5.82629e-16	3.99263e-16	6.66988e-15	-2.51405e-16	-2.32178e-15	6.13106e-15	6.15839e-15	-4.09338e-15	8.33065e-16	1.74861e-15	2.37525e-15	7.04641e-15	-4.78954e-15	-1.24207e-13	-1.07881e-13	8.18452e-14	-9.88428e-14	-3.76145e-15
-3.48554e-31	-1.08007e-30	-6.6025e-31	4.03219e-30	-4.16262e-30	2.44863e-30	1.38159e-30	1.94414e-28	1.99505e-28	1.13029e-27	-4.30323e-28	2.52461e-26	9.78153e-26	-4.43475e-27	-1.26913e-26	9.1095e-25	2.01911e-25	8.44393e-22	-5.86807e-21	-3.72814e-21	3.8975e-21	-2.34884e-20	-2.32614e-20	-1.79738e-20	5.04356e-20	4.4229e-19	2.16872e-19	-7.40839e-20	-2.22482e-19	-7.70804e-20	1.60888e-19	4.5585e-20	6.19982e-20	-4.2486e-20	-7.0975e-19	2.67523e-20	2.47063e-19	-6.52413e-19	-6.55322e-19	4.35581e-19	-8.86474e-20	-1.86071e-19	-2.52753e-19	-7.49817e-19	5.0966e-19	1.3217e-17	1.14798e-17	-8.70924e-18	1.0518e-17	4.0026e-19
3.40043e-29	1.05498e-28	6.45132e-29	-3.94122e-28	4.06777e-28	-2.39818e-28	-1.35035e-28	-1.90028e-26	-1.95095e-26	-1.10473e-25	4.20636e-26	-2.46784e-24	-9.56125e-24	4.33429e-25	1.24058e-24	-8.90448e-23	-1.97361e-23	-8.25377e-20	5.73592e-19	3.64418e-19	-3.80973e-19	2.29595e-18	2.27376e-18	1.75691e-18	-4.92998e-18	-4.3233e-17	-2.11988e-17	7.24155e-18	2.17472e-17	7.53446e-18	-1.57265e-17	-4.45584e-18	-6.0602e-18	4.15292e-18	6.93767e-17	-2.61499e-18	-2.41499e-17	6.37721e-17	6.40564e-17	-4.25772e-17	8.66511e-18	1.81881e-17	2.47061e-17	7.32931e-17	-4.98183e-17	-1.29194e-15	-1.12213e-15	8.51311e-16	-1.02811e-15	-3.91247e-17
-1.65973e-29	-5.15864e-29	-3.23019e-29	1.93203e-28	-2.00197e-28	1.16615e-28	6.59555e-29	9.31398e-27	9.57144e-27	5.41594e-26	-2.06316e-26	1.20954e-24	4.68652e-24	-2.1261e-25	-6.08037e-25	4.36444e-23	9.67443e-24	4.04555e-20	-2.81144e-19	-1.78618e-19	1.86732e-19	-1.12535e-18	-1.11447e-18	-8.61141e-19	2.41641e-18	2.11905e-17	1.03905e-17	-3.54942e-18	-1.06593e-17	-3.69298e-18	7.70828e-18	2.18401e-18	2.97038e-18	-2.03554e-18	-3.40047e-17	1.28172e-18	1.1837e-17	-3.12576e-17	-3.1397e-17	2.0869e-17	-4.24717e-18	-8.91483e-18	-1.21096e-17	-3.59243e-17	2.44182e-17	6.33237e-16	5.50006e-16	-4.17267e-16	5.03925e-16	1.91768e-17
-0.00609092	0.0732109	-0.400569	0.0061146	0.0271308	0.00161482	-0.00444697	-0.00409319	0.00084244	-0.000732472	0.000812967	4.58888e-05	0.000288028	0.000131288	-9.96538e-05	0.000284001	0.000295819	0.000182247	0.00310872	-0.00965079	0.00133113	0.00481709	-0.00224233	-0.00682715	-0.0111183	-0.00538162	-0.0611908	0.124798	-0.238173	-0.0713215	0.0225147	-0.0133199	-0.00267937	0.004024	0.0222879	-0.0161694	0.00170799	-0.0179428	-0.00467028	-0.000215138	-0.00130819	-0.00600137	-0.00345356	-0.000958438	-0.000729028	0.000735717	0.000189675	-0.001294	0.00154024	0.000219889
1.1217e-32	3.47941e-32	2.15405e-32	-1.29983e-31	1.34521e-31	-7.8517e-32	-4.43813e-32	-6.26473e-30	-6.4332e-30	-3.64283e-29	1.38719e-29	-8.1355e-28	-3.15218e-27	1.42977e-28	4.08966e-28	-2.93558e-26	-6.50706e-27	-2.7211e-23	1.89101e-22	1.20141e-22	-1.25599e-22	7.56926e-22	7.4961e-22	5.79215e-22	-1.62531e-21	-1.4253e-20	-6.98881e-21	2.38739e-21	7.16958e-21	2.48395e-21	-5.18469e-21	-1.469e-21	-1.99792e-21	1.36913e-21	2.2872e-20	-8.62106e-22	-7.96173e-21	2.10243e-20	2.11181e-20	-1.40368e-20	2.8567e-21	5.99624e-21	8.14509e-21	2.41632e-20	-1.6424e-20	-4.25924e-19	-3.69941e-19	2.80659e-19	-3.38947e-19	-1.28986e-20
1.11918e-32	3.47364e-32	2.16038e-32	-1.29934e-31	1.34545e-31	-7.85373e-32	-4.43845e-32	-6.26474e-30	-6.43265e-30	-3.64289e-29	1.38723e-29	-8.13551e-28	-3.15219e-27	1.42968e-28	4.08973e-28	-2.93558e-26	-6.50703e-27	-2.7211e-23	1.89101e-22	1.20141e-22	-1.25599e-22	7.56926e-22	7.4961e-22	5.79215e-22	-1.62531e-21	-1.4253e-20	-6.98881e-21	2.38739e-21	7.16958e-21	2.48395e-21	-5.18469e-21	-1.469e-21	-1.99792e-21	1.36913e-21	2.2872e-20	-8.62106e-22	-7.96172e-21	2.10243e-20	2.11181e-20	-1.40368e-20	2.8567e-21	5.99624e-21	8.14509e-21	2.41632e-20	-1.6424e-20	-4.25924e-19	-3.69941e-19	2.80659e-19	-3.38947e-19	-1.28986e-20
1.6903e-31	2.46641e-31	6.71283e-31	1.92872e-30	-1.49326e-30	-2.52795e-31	8.54477e-31	-7.54735e-31	1.77671e-29	4.09343e-29	-1.1166e-28	-8.84189e-29	-2.85825e-28	-9.98755e-28	9.04036e-29	2.40856e-28	8.84974e-28	-3.21368e-26	-1.90994e-26	-1.28508e-26	2.01098e-26	-1.31463e-26	2.61492e-26	-1.70675e-26	-7.74798e-26	2.87634e-26	-2.82182e-26	1.46193e-25	-7.75841e-26	-1.10685e-25	-1.3382e-25	2.2826e-25	4.43904e-25	2.19656e-25	-2.04352e-25	-9.54386e-25	2.9375e-25	1.08631e-25	7.92724e-25	2.85478e-25	8.21394e-25	6.52171e-26	-4.79737e-25	1.62645e-25	-3.73504e-26	1.55878e-25	-1.47144e-24	-1.56513e-24	1.581e-24	6.41276e-24
8.03466e-27	2.49045e-26	1.52383e-26	-9.30536e-26	9.60286e-26	-5.65968e-26	-3.19816e-26	-4.48842e-24	-4.60437e-24	-2.60917e-23	9.92974e-24	-5.82886e-22	-2.25831e-21	1.02382e-22	2.93016e-22	-2.10316e-20	-4.66157e-21	-1.94948e-17	1.35478e-16	8.60729e-17	-8.9983e-17	5.42286e-16	5.37045e-16	4.14969e-16	-1.16443e-15	-1.02113e-14	-5.00701e-15	1.7104e-15	5.13652e-15	1.77958e-15	-3.71448e-15	-1.05244e-15	-1.43138e-15	9.8089e-16	1.63863e-14	-6.17641e-16	-5.70404e-15	1.50625e-14	1.51297e-14	-1.00564e-14	2.04663e-15	4.2959e-15	5.8354e-15	1.73113e-14	-1.17667e-14	-3.05146e-13	-2.65038e-13	2.01074e-13	-2.42833e-13	-9.24096e-15
4.58109e-29	1.87978e-28	-1.78096e-28	4.15809e-29	4.29573e-28	-5.75589e-28	-1.29378e-28	-4.82773e-29	-5.75671e-27	4.28906e-27	-2.60164e-26	2.14247e-26	1.12151e-25	1.76876e-26	-5.14888e-26	-5.24823e-25	-2.0801e-25	3.08059e-24	-2.79886e-24	-3.02937e-24	-6.4642e-24	-1.5892e-24	4.52582e-24	-1.94422e-24	1.24975e-23	-1.19573e-23	4.02129e-23	7.84573e-24	-3.24355e-23	5.93483e-24	-2.68455e-23	3.99971e-24	3.5283e-23	2.47602e-23	2.01662e-23	-1.40387e-23	2.95644e-23	-1.5946e-22	-1.32087e-22	1.26777e-22	1.29387e-23	-1.17895e-22	-4.19835e-23	4.77598e-23	5.58261e-22	-2.66782e-22	6.26289e-22	2.27827e-22	1.81286e-21	-3.92785e-22
-1.94793e-29	-4.51627e-29	3.1458e-29	6.39105e-30	-1.07145e-28	2.52311e-29	2.41491e-29	-7.38726e-29	1.45787e-27	1.58058e-27	1.09582e-27	2.21243e-26	1.07105e-26	1.89772e-27	8.15535e-28	1.18601e-25	-1.85463e-25	-1.00974e-24	-7.50674e-25	-4.73046e-25	1.75836e-25	-3.96414e-26	-2.33932e-24	3.34778e-24	4.16585e-24	-2.54389e-24	-1.40764e-25	2.6915e-25	-6.53637e-24	9.09724e-24	1.61639e-23	2.7e-24	1.42987e-23	-1.50926e-24	7.01237e-24	-5.63347e-24	-2.50166e-24	-2.1404e-23	1.61497e-23	-1.08632e-23	1.41293e-23	1.3485e-23	-1.60071e-23	-2.52373e-23	-3.45516e-23	-8.87749e-23	1.1294e-22	2.29488e-22	-1.93919e-23	-3.18091e-22
2.93673e-29	9.11348e-29	5.64964e-29	-3.40451e-28	3.52513e-28	-2.05407e-28	-1.1586e-28	-1.63945e-26	-1.68599e-26	-9.5331e-26	3.6331e-26	-2.12907e-24	-8.24947e-24	3.74236e-25	1.07036e-24	-7.68243e-23	-1.70289e-23	-7.12114e-20	4.9488e-19	3.14411e-19	-3.28693e-19	1.98088e-18	1.96174e-18	1.51581e-18	-4.25346e-18	-3.73003e-17	-1.82898e-17	6.24782e-18	1.87629e-17	6.50053e-18	-1.35684e-17	-3.84439e-18	-5.22858e-18	3.58303e-18	5.98564e-17	-2.25614e-18	-2.08359e-17	5.50209e-17	5.52662e-17	-3.67345e-17	7.47603e-18	1.56922e-17	2.13158e-17	6.32354e-17	-4.29819e-17	-1.11465e-15	-9.68141e-16	7.34489e-16	-8.87028e-16	-3.37557e-17
2.47944e-31	7.69742e-31	4.75308e-31	-2.87963e-30	2.97666e-30	-1.74174e-30	-9.8622e-31	-1.38707e-28	-1.42518e-28	-8.06353e-28	3.07182e-28	-1.80136e-26	-6.97914e-26	3.16569e-27	9.05536e-27	-6.49956e-25	-1.44067e-25	-6.02465e-22	4.1868e-21	2.65999e-21	-2.78082e-21	1.67588e-20	1.65968e-20	1.28241e-20	-3.59853e-20	-3.15569e-19	-1.54736e-19	5.28581e-20	1.58738e-19	5.4996e-20	-1.14792e-19	-3.25244e-20	-4.42351e-20	3.03133e-20	5.06399e-19	-1.90875e-20	-1.76277e-19	4.6549e-19	4.67565e-19	-3.10782e-19	6.32489e-20	1.3276e-19	1.80337e-19	5.34986e-19	-3.63637e-19	-9.43018e-18	-8.1907e-18	6.21395e-18	-7.50447e-18	-2.85582e-19
-1.0788e-35	-6.33938e-36	2.10754e-35	-8.23891e-36	-1.1537e-35	9.04655e-36	-7.77142e-35	-3.01894e-35	3.45907e-34	8.50332e-34	1.65782e-34	1.50845e-33	1.19138e-32	-3.61685e-33	-9.05516e-33	3.66578e-32	1.79376e-32	-8.24643e-31	-2.36136e-31	-1.32316e-31	5.4097e-31	-1.54039e-31	-2.84536e-31	-2.70316e-31	1.1244e-30	-1.08368e-30	-7.48013e-31	-8.98088e-31	-1.55001e-30	1.64137e-31	5.45857e-31	-9.79927e-30	3.30303e-30	-8.14589e-30	-5.20464e-30	4.39669e-30	-3.72463e-29	4.84867e-30	-1.63471e-29	-8.10617e-30	1.65336e-29	2.99657e-30	-1.16446e-29	5.61672e-30	5.4187e-29	5.04398e-29	-3.64407e-29	-2.34643e-29	-5.17895e-29	-2.26733e-29
-6.45369e-30	-2.00504e-29	-1.24114e-29	7.49173e-29	-7.74845e-29	4.52352e-29	2.5502e-29	3.6066e-27	3.70703e-27	2.09702e-26	-7.98939e-27	4.68314e-25	1.81457e-24	-8.23012e-26	-2.35421e-25	1.68987e-23	3.74583e-24	1.56641e-20	-1.08857e-19	-6.91597e-20	7.23014e-20	-4.35728e-19	-4.31516e-19	-3.33428e-19	9.35617e-19	8.2048e-18	4.02314e-18	-1.37431e-18	-4.1272e-18	-1.4299e-18	2.98459e-18	8.45635e-19	1.15011e-18	-7.88146e-19	-1.31664e-17	4.96275e-19	4.5832e-18	-1.21027e-17	-1.21567e-17	8.08034e-18	-1.64447e-18	-3.45176e-18	-4.68875e-18	-1.39096e-17	9.45456e-18	2.45185e-16	2.12958e-16	-1.61563e-16	1.95116e-16	7.42512e-18
1.69104e-31	2.46909e-31	6.71338e-31	1.92875e-30	-1.49307e-30	-2.52802e-31	8.55574e-31	-7.55822e-31	1.77628e-29	4.09313e-29	-1.11666e-28	-8.85963e-29	-2.85952e-28	-9.98595e-28	9.01735e-29	2.40814e-28	8.85375e-28	-3.21223e-26	-1.91158e-26	-1.28593e-26	2.01181e-26	-1.31521e-26	2.61386e-26	-1.7088e-26	-7.75034e-26	2.86761e-26	-2.82589e-26	1.46236e-25	-7.76024e-26	-1.10746e-25	-1.33867e-25	2.28263e-25	4.43945e-25	2.19655e-25	-2.04361e-25	-9.54349e-25	2.93791e-25	1.08773e-25	7.92673e-25	2.8566e-25	8.21485e-25	6.46454e-26	-4.79606e-25	1.62558e-25	-3.74726e-26	1.56866e-25	-1.47237e-24	-1.56438e-24	1.58014e-24	6.41354e-24
-1.6649e-29	-5.16974e-29	-3.21614e-29	1.93292e-28	-2.00155e-28	1.16577e-28	6.59582e-29	9.31396e-27	9.57221e-27	5.41613e-26	-2.06307e-26	1.20955e-24	4.68653e-24	-2.12608e-25	-6.08024e-25	4.36444e-23	9.67437e-24	4.04555e-20	-2.81144e-19	-1.78618e-19	1.86732e-19	-1.12535e-18	-1.11447e-18	-8.61141e-19	2.41641e-18	2.11905e-17	1.03905e-17	-3.54942e-18	-1.06593e-17	-3.69298e-18	7.70828e-18	2.18401e-18	2.97038e-18	-2.03554e-18	-3.40047e-17	1.28172e-18	1.1837e-17	-3.12576e-17	-3.1397e-17	2.0869e-17	-4.24717e-18	-8.91483e-18	-1.21096e-17	-3.59243e-17	2.44182e-17	6.33237e-16	5.50006e-16	-4.17267e-16	5.03925e-16	1.91768e-17
7.53602e-29	2.34073e-28	1.44842e-28	-8.74368e-28	9.04803e-28	-5.30976e-28	-2.99272e-28	-4.22231e-26	-4.33563e-26	-2.45515e-25	9.34197e-26	-5.48314e-24	-2.12443e-23	9.6328e-25	2.75639e-24	-1.97846e-22	-4.38533e-23	-1.8339e-19	1.27446e-18	8.097e-19	-8.46483e-19	5.10136e-18	5.05205e-18	3.90367e-18	-1.09539e-17	-9.60593e-17	-4.71016e-17	1.609e-17	4.832e-17	1.67408e-17	-3.49427e-17	-9.90043e-18	-1.34652e-17	9.22737e-18	1.54148e-16	-5.81023e-18	-5.36587e-17	1.41695e-16	1.42327e-16	-9.46021e-17	1.9253e-17	4.04121e-17	5.48945e-17	1.6285e-16	-1.10691e-16	-2.87055e-15	-2.49325e-15	1.89153e-15	-2.28436e-15	-8.6931e-17
-5.57087e-29	-1.72948e-28	-1.06399e-28	6.462e-28	-6.67651e-28	3.9256e-28	2.21197e-28	3.11795e-26	3.20037e-26	1.81294e-25	-6.89981e-26	4.04943e-24	1.56889e-23	-7.11352e-25	-2.0355e-24	1.46109e-22	3.23854e-23	1.35434e-19	-9.41194e-19	-5.97965e-19	6.25129e-19	-3.76737e-18	-3.73095e-18	-2.88287e-18	8.08949e-18	7.094e-17	3.47846e-17	-1.18825e-17	-3.56844e-17	-1.23631e-17	2.58052e-17	7.31149e-18	9.94404e-18	-6.81443e-18	-1.13839e-16	4.29087e-18	3.9627e-17	-1.04642e-16	-1.05109e-16	6.98639e-17	-1.42184e-17	-2.98444e-17	-4.05397e-17	-1.20265e-16	8.17456e-17	2.11991e-15	1.84127e-15	-1.3969e-15	1.687e-15	6.41987e-17
-1.52495e-33	-1.74451e-34	-3.26143e-34	-3.57943e-34	3.91845e-33	-7.18153e-33	2.50777e-33	-2.67911e-33	-3.66075e-32	-2.51548e-31	1.00902e-31	-1.91609e-30	1.12177e-30	1.10488e-30	3.7536e-30	-3.86445e-30	-1.09225e-29	6.06315e-29	-4.436e-29	-9.52336e-29	-1.23084e-28	-4.14923e-29	-3.434e-29	-6.34577e-29	1.69422e-28	-5.17047e-29	-1.65857e-28	3.67357e-29	9.40494e-29	-1.7578e-28	3.43672e-28	6.65525e-28	4.75935e-28	6.57221e-28	8.04229e-28	5.40324e-28	-7.16025e-28	-1.17141e-27	3.73093e-28	-4.47569e-28	1.9399e-28	-3.98526e-28	1.97864e-28	-1.26816e-28	4.86036e-27	-1.61459e-27	-5.76197e-27	-7.8488e-27	-9.40292e-27	4.09697e-27
3.40043e-29	1.05498e-28	6.45132e-29	-3.94122e-28	4.06777e-28	-2.39818e-28	-1.35035e-28	-1.90028e-26	-1.95095e-26	-1.10473e-25	4.20636e-26	-2.46784e-24	-9.56125e-24	4.33429e-25	1.24058e-24	-8.90448e-23	-1.97361e-23	-8.25377e-20	5.73592e-19	3.64418e-19	-3.80973e-19	2.29595e-18	2.27376e-18	1.75691e-18	-4.92998e-18	-4.3233e-17	-2.11988e-17	7.24155e-18	2.17472e-17	7.53446e-18	-1.57265e-17	-4.45584e-18	-6.0602e-18	4.15292e-18	6.93767e-17	-2.61499e-18	-2.41499e-17	6.37721e-17	6.40564e-17	-4.25772e-17	8.66511e-18	1.81881e-17	2.47061e-17	7.32931e-17	-4.98183e-17	-1.29194e-15	-1.12213e-15	8.51311e-16	-1.02811e-15	-3.91247e-17
-2.58668e-30	-8.02085e-30	-4.95422e-30	3.00333e-29	-3.10492e-29	1.82258e-29	1.02702e-29	1.44862e-27	1.48841e-27	8.42222e-27	-3.20481e-27	1.88125e-25	7.28878e-25	-3.30559e-26	-9.45667e-26	6.78797e-24	1.50459e-24	6.292e-21	-4.37259e-20	-2.77802e-20	2.90422e-20	-1.75024e-19	-1.73332e-19	-1.33932e-19	3.75821e-19	3.29573e-18	1.61602e-18	-5.52036e-19	-1.65782e-18	-5.74365e-19	1.19886e-18	3.39677e-19	4.6198e-19	-3.16585e-19	-5.28871e-18	1.99345e-19	1.84099e-18	-4.86146e-18	-4.88313e-18	3.24573e-18	-6.60556e-19	-1.38651e-18	-1.88339e-18	-5.58726e-18	3.79773e-18	9.84865e-17	8.55416e-17	-6.4897e-17	7.83748e-17	2.98254e-18
1.60693e-26	4.98091e-26	3.04766e-26	-1.86107e-25	1.92057e-25	-1.13194e-25	-6.39632e-26	-8.97683e-24	-9.20873e-24	-5.21835e-23	1.98595e-23	-1.16577e-21	-4.51661e-21	2.04763e-22	5.86033e-22	-4.20633e-20	-9.32313e-21	-3.89896e-17	2.70957e-16	1.72146e-16	-1.79966e-16	1.08457e-15	1.07409e-15	8.29937e-16	-2.32885e-15	-2.04226e-14	-1.0014e-14	3.4208e-15	1.0273e-14	3.55917e-15	-7.42897e-15	-2.10488e-15	-2.86275e-15	1.96178e-15	3.27725e-14	-1.23528e-15	-1.14081e-14	3.0125e-14	3.02593e-14	-2.01128e-14	4.09327e-15	8.5918e-15	1.16708e-14	3.46226e-14	-2.35334e-14	-6.10291e-13	-5.30076e-13	4.02147e-13	-4.85665e-13	-1.84819e-14
4.73714e-06	3.41527e-05	-5.6767e-06	1.39611e-05	-8.65592e-06	6.09347e-05	-1.79053e-05	-2.98584e-05	0.000204041	-0.000156592	-5.28183e-05	0.00736563	0.0205417	-0.0146707	0.0267882	0.353827	0.0227779	0.00232418	-0.00926067	-0.0344195	-0.0333986	-0.00185298	-0.0607407	0.119772	-0.0247125	0.0497811	-0.157927	-0.00835131	0.0428225	0.00720829	0.0158436	0.0126003	0.0174626	-0.00822207	-0.0458699	-0.0546144	0.0160344	-0.0898907	-0.134781	0.130599	-0.0373593	-0.00358065	-0.0490067	0.028254	0.00915477	-0.0268837	0.0434762	0.0182194	0.0139474	0.131334
-1.35892e-05	-3.69326e-05	-5.50906e-06	2.31403e-05	-0.00011844	-4.37853e-05	6.75713e-05	1.85422e-06	-0.00252725	0.00570136	0.00209516	-0.016452	-0.0242261	-0.0504749	0.494888	-0.0368067	-0.0156262	-5.13349e-05	0.00108372	-0.00185598	0.000265326	0.00271504	2.73414e-05	-0.000129009	-0.00100571	-0.00528909	-0.00037137	0.00465664	-0.019976	0.0188244	-0.0121382	0.00782823	0.00172314	-0.027168	-0.0905472	0.027829	-0.00437994	0.0141685	0.0265836	0.0213956	-0.0260404	0.0613185	0.0237971	0.0210533	0.0106783	0.0422534	0.0483803	-0.00245007	-0.0669513	0.0186636
-1.26876e-33	-2.40522e-33	4.87937e-34	-2.73595e-33	1.54785e-33	-5.94384e-33	4.30023e-33	6.81779e-34	-3.63719e-32	7.32234e-32	1.03424e-31	-1.36579e-30	4.27261e-31	-9.40376e-31	-7.23697e-31	-2.40091e-31	1.43528e-30	4.94005e-30	-6.10859e-29	7.35176e-29	-8.44494e-30	7.58976e-29	2.62497e-29	-1.16789e-28	1.1355e-28	-2.94207e-29	-1.62246e-28	3.88946e-28	3.37144e-29	4.53677e-28	7.67074e-28	4.46393e-28	2.49522e-28	2.74126e-28	-3.02832e-28	-1.80862e-27	-3.06947e-28	-4.07751e-28	6.73384e-28	-9.10173e-29	-8.29719e-28	-8.19328e-28	6.98655e-28	1.52516e-28	7.63742e-28	3.05031e-27	-7.86381e-27	-1.25348e-27	5.93723e-28	2.27907e-27
-2.32567e-33	-7.22187e-33	-4.47293e-33	2.70487e-32	-2.79653e-32	1.64343e-32	9.26144e-33	1.30544e-30	1.34083e-30	7.5898e-30	-2.88819e-30	1.69529e-28	6.56842e-28	-2.97809e-29	-8.5222e-29	6.11713e-27	1.35589e-27	5.67017e-24	-3.94046e-23	-2.50348e-23	2.61721e-23	-1.57727e-22	-1.56202e-22	-1.20696e-22	3.3868e-22	2.97002e-21	1.45632e-21	-4.9748e-22	-1.49399e-21	-5.17602e-22	1.08038e-21	3.06107e-22	4.16324e-22	-2.85297e-22	-4.76604e-21	1.79644e-22	1.65905e-21	-4.38101e-21	-4.40055e-21	2.92497e-21	-5.95275e-22	-1.24949e-21	-1.69726e-21	-5.03509e-21	3.42241e-21	8.87533e-20	7.70878e-20	-5.84834e-20	7.06292e-20	2.68779e-21
-5.07374e-30	-1.57599e-29	-9.77655e-30	5.89815e-29	-6.09873e-29	3.56414e-29	2.01427e-29	2.8401e-27	2.91744e-27	1.65116e-26	-6.29078e-27	3.68813e-25	1.42897e-24	-6.48164e-26	-1.85399e-25	1.33078e-23	2.94981e-24	1.23355e-20	-8.57248e-20	-5.44632e-20	5.69374e-20	-3.43136e-19	-3.39819e-19	-2.62574e-19	7.36798e-19	6.46128e-18	3.16822e-18	-1.08227e-18	-3.25017e-18	-1.12604e-18	2.35037e-18	6.65937e-19	9.05713e-19	-6.20665e-19	-1.03685e-17	3.90816e-19	3.60927e-18	-9.5309e-18	-9.5734e-18	6.36327e-18	-1.29502e-18	-2.71826e-18	-3.69239e-18	-1.09538e-17	7.44547e-18	1.93083e-16	1.67705e-16	-1.27231e-16	1.53654e-16	5.84728e-18
-8.31959e-29	-2.58587e-28	-1.60963e-28	9.67497e-28	-1.00146e-27	5.84892e-28	3.31009e-28	4.66325e-26	4.78665e-26	2.71138e-25	-1.0329e-25	6.05591e-24	2.34638e-23	-1.06435e-24	-3.0443e-24	2.18513e-22	4.84363e-23	2.02549e-19	-1.4076e-18	-8.94288e-19	9.34913e-19	-5.63429e-18	-5.57983e-18	-4.31148e-18	1.20982e-17	1.06094e-16	5.20222e-17	-1.77709e-17	-5.33678e-17	-1.84897e-17	3.85931e-17	1.09347e-17	1.48718e-17	-1.01913e-17	-1.70251e-16	6.41721e-18	5.92643e-17	-1.56498e-16	-1.57195e-16	1.04485e-16	-2.12643e-17	-4.46339e-17	-6.06292e-17	-1.79862e-16	1.22255e-16	3.17043e-15	2.75371e-15	-2.08913e-15	2.523e-15	9.60125e-17
3.39004e-29	1.05281e-28	6.48008e-29	-3.93949e-28	4.06901e-28	-2.39765e-28	-1.35092e-28	-1.90028e-26	-1.95053e-26	-1.10468e-25	4.20608e-26	-2.46783e-24	-9.56126e-24	4.33433e-25	1.24059e-24	-8.90451e-23	-1.97361e-23	-8.25377e-20	5.73592e-19	3.64418e-19	-3.80973e-19	2.29595e-18	2.27376e-18	1.75691e-18	-4.92998e-18	-4.3233e-17	-2.11988e-17	7.24155e-18	2.17472e-17	7.53446e-18	-1.57265e-17	-4.45584e-18	-6.0602e-18	4.15292e-18	6.93767e-17	-2.61499e-18	-2.41499e-17	6.37721e-17	6.40564e-17	-4.25772e-17	8.66511e-18	1.81881e-17	2.47061e-17	7.32931e-17	-4.98183e-17	-1.29194e-15	-1.12213e-15	8.51311e-16	-1.02811e-15	-3.91247e-17
-2.58668e-30	-8.02085e-30	-4.95422e-30	3.00333e-29	-3.10492e-29	1.82258e-29	1.02702e-29	1.44862e-27	1.48841e-27	8.42222e-27	-3.20481e-27	1.88125e-25	7.28878e-25	-3.30559e-26	-9.45667e-26	6.78797e-24	1.50459e-24	6.292e-21	-4.37259e-20	-2.77802e-20	2.90422e-20	-1.75024e-19	-1.73332e-19	-1.33932e-19	3.75821e-19	3.29573e-18	1.61602e-18	-5.52036e-19	-1.65782e-18	-5.74365e-19	1.19886e-18	3.39677e-19	4.6198e-19	-3.16585e-19	-5.28871e-18	1.99345e-19	1.84099e-18	-4.86146e-18	-4.88313e-18	3.24573e-18	-6.60556e-19	-1.38651e-18	-1.88339e-18	-5.58726e-18	3.79773e-18	9.84865e-17	8.55416e-17	-6.4897e-17	7.83748e-17	2.98254e-18
-0.316007	-0.00656391	0.00333992	-0.00102107	-0.00498004	0.00541813	-0.000867499	-0.00545407	0.000111639	-9.72177e-05	0.000216182	0.000694582	0.000484834	-4.58284e-05	-0.00138692	-0.00247012	0.00482136	0.174421	-0.384927	-0.346383	0.485638	0.597436	0.0506821	0.0433907	0.044689	0.0349809	-0.000469845	-0.0224333	0.0100433	-0.00930723	-0.00316991	0.0110839	-0.00113159	-0.00255749	0.00392166	-0.00356083	0.00299235	0.000835002	0.00103313	-0.0062942	0.000904813	0.00126204	0.00260723	-0.00410904	0.00106604	-0.0030016	9.321e-05	-0.00112417	-0.000198887	-0.000292002
-0.0124084	-0.0395155	0.00589884	-0.0266855	0.26069	-0.478587	0.180935	0.0320492	0.00231433	-0.00294904	-0.0271226	-0.00392552	0.0341431	-0.0257359	0.000703285	0.0219614	1.91114e-05	0.0167102	-0.0224394	0.00601963	-0.0695677	0.0723921	-0.00804218	-0.109241	-0.0249311	0.0380224	0.0120398	0.264786	0.0975512	0.298961	0.0506272	-0.479092	-0.0478156	-0.0497466	0.0433459	0.230006	-0.0934089	-0.371558	0.0987838	-0.0322984	-0.116713	-0.0619701	0.0188601	-0.0405857	-0.0253069	-0.00473528	0.00278936	0.000314231	0.00157831	0.00291571
9.44179e-32	2.31919e-31	2.72525e-31	-7.96717e-31	-5.93811e-31	5.34953e-32	4.76754e-31	-1.0356e-31	7.53556e-30	1.63312e-29	2.87239e-30	-2.18561e-28	-2.18687e-28	-8.77294e-29	-1.61574e-28	4.23602e-28	4.95941e-28	2.18442e-27	-1.86846e-27	2.43114e-27	-3.8372e-27	3.07168e-28	1.25814e-27	9.47398e-28	3.83268e-27	7.42805e-27	3.81969e-27	-6.89766e-27	-3.61086e-26	1.33669e-26	-6.69393e-27	4.87641e-27	-9.68586e-27	-7.41716e-26	3.71068e-27	1.49659e-25	-3.19479e-26	1.5697e-27	4.58826e-26	1.77431e-26	-6.35221e-26	1.55188e-25	2.60133e-26	-2.3701e-25	-4.75113e-26	3.52853e-25	-9.6545e-25	-3.33445e-25	7.03777e-25	8.25437e-25
1.26949e-08	2.26974e-08	-1.48387e-09	6.47387e-08	-4.30902e-08	-7.92884e-08	2.45902e-08	-7.78952e-08	1.08197e-06	3.55559e-06	1.79674e-07	-2.74789e-05	1.16011e-05	-2.45459e-05	6.83866e-06	-8.73516e-05	7.49231e-05	-0.000534673	0.000311858	0.000729746	0.00110661	-0.00298874	0.00253842	0.000715589	-0.00129322	-0.0046426	-0.00557739	-0.0039605	0.00680579	-0.0434419	0.0605235	-0.013089	-0.0388398	0.0579471	-0.191258	0.0592562	0.154656	-0.0865463	-0.142417	-0.232998	0.114172	-0.0207792	-0.0325951	-0.0411328	0.0104271	-0.294361	-0.187384	0.142225	-0.126945	-0.0126501
-2.58668e-30	-8.02085e-30	-4.95422e-30	3.00333e-29	-3.10492e-29	1.82258e-29	1.02702e-29	1.44862e-27	1.48841e-27	8.42222e-27	-3.20481e-27	1.88125e-25	7.28878e-25	-3.30559e-26	-9.45667e-26	6.78797e-24	1.50459e-24	6.292e-21	-4.37259e-20	-2.77802e-20	2.90422e-20	-1.75024e-19	-1.73332e-19	-1.33932e-19	3.75821e-19	3.29573e-18	1.61602e-18	-5.52036e-19	-1.65782e-18	-5.74365e-19	1.19886e-18	3.39677e-19	4.6198e-19	-3.16585e-19	-5.28871e-18	1.99345e-19	1.84099e-18	-4.86146e-18	-4.88313e-18	3.24573e-18	-6.60556e-19	-1.38651e-18	-1.88339e-18	-5.58726e-18	3.79773e-18	9.84865e-17	8.55416e-17	-6.4897e-17	7.83748e-17	2.98254e-18
-6.24503e-31	-1.9416e-30	-1.2059e-30	7.26134e-30	-7.51169e-30	4.38576e-30	2.48435e-30	3.49776e-28	3.591e-28	2.03365e-27	-7.74911e-28	4.54259e-26	1.76006e-25	-7.9826e-27	-2.28358e-26	1.6391e-24	3.6332e-25	1.51934e-21	-1.05586e-20	-6.70816e-21	7.01289e-21	-4.22635e-20	-4.1855e-20	-3.23409e-20	9.07504e-20	7.95826e-19	3.90225e-19	-1.33301e-19	-4.00318e-19	-1.38693e-19	2.89491e-19	8.20225e-20	1.11555e-19	-7.64464e-20	-1.27708e-18	4.81363e-20	4.44548e-19	-1.17391e-18	-1.17914e-18	7.83754e-19	-1.59506e-19	-3.34804e-19	-4.54786e-19	-1.34917e-18	9.17047e-19	2.37817e-17	2.06559e-17	-1.56708e-17	1.89253e-17	7.20201e-19
1.1217e-32	3.47941e-32	2.15405e-32	-1.29983e-31	1.34521e-31	-7.8517e-32	-4.43813e-32	-6.26473e-30	-6.4332e-30	-3.64283e-29	1.38719e-29	-8.1355e-28	-3.15218e-27	1.42977e-28	4.08966e-28	-2.93558e-26	-6.50706e-27	-2.7211e-23	1.89101e-22	1.20141e-22	-1.25599e-22	7.56926e-22	7.4961e-22	5.79215e-22	-1.62531e-21	-1.4253e-20	-6.98881e-21	2.38739e-21	7.16958e-21	2.48395e-21	-5.18469e-21	-1.469e-21	-1.99792e-21	1.36913e-21	2.2872e-20	-8.62106e-22	-7.96173e-21	2.10243e-20	2.11181e-20	-1.40368e-20	2.8567e-21	5.99624e-21	8.14509e-21	2.41632e-20	-1.6424e-20	-4.25924e-19	-3.69941e-19	2.80659e-19	-3.38947e-19	-1.28986e-20
-5.33071e-30	-1.65462e-29	-1.02464e-29	6.1831e-29	-6.4015e-29	3.74317e-29	2.11023e-29	2.98227e-27	3.06305e-27	1.73412e-26	-6.60136e-27	3.87276e-25	1.5005e-24	-6.80687e-26	-1.94682e-25	1.3974e-23	3.0975e-24	1.2953e-20	-9.00163e-20	-5.71897e-20	5.97877e-20	-3.60313e-19	-3.5683e-19	-2.75719e-19	7.73683e-19	6.78474e-18	3.32682e-18	-1.13645e-18	-3.41288e-18	-1.18241e-18	2.46803e-18	6.99275e-19	9.51054e-19	-6.51736e-19	-1.08876e-17	4.10381e-19	3.78995e-18	-1.0008e-17	-1.00527e-17	6.68182e-18	-1.35985e-18	-2.85434e-18	-3.87724e-18	-1.15022e-17	7.8182e-18	2.02749e-16	1.761e-16	-1.336e-16	1.61346e-16	6.14e-18
3.39004e-29	1.05281e-28	6.48008e-29	-3.93949e-28	4.06901e-28	-2.39765e-28	-1.35092e-28	-1.90028e-26	-1.95053e-26	-1.10468e-25	4.20608e-26	-2.46783e-24	-9.56126e-24	4.33433e-25	1.24059e-24	-8.90451e-23	-1.97361e-23	-8.25377e-20	5.73592e-19	3.64418e-19	-3.80973e-19	2.29595e-18	2.27376e-18	1.75691e-18	-4.92998e-18	-4.3233e-17	-2.11988e-17	7.24155e-18	2.17472e-17	7.53446e-18	-1.57265e-17	-4.45584e-18	-6.0602e-18	4.15292e-18	6.93767e-17	-2.61499e-18	-2.41499e-17	6.37721e-17	6.40564e-17	-4.25772e-17	8.66511e-18	1.81881e-17	2.47061e-17	7.32931e-17	-4.98183e-17	-1.29194e-15	-1.12213e-15	8.51311e-16	-1.02811e-15	-3.91247e-17
-5.08301e-29	-1.5778e-28	-9.73583e-29	5.89912e-28	-6.09528e-28	3.58423e-28	2.02191e-28	2.84638e-26	2.92108e-26	1.6548e-25	-6.29959e-26	3.69652e-24	1.43211e-23	-6.49362e-25	-1.85807e-24	1.33371e-22	2.95614e-23	1.23626e-19	-8.59132e-19	-5.45829e-19	5.70625e-19	-3.4389e-18	-3.40566e-18	-2.63151e-18	7.38418e-18	6.47548e-17	3.17518e-17	-1.08465e-17	-3.25731e-17	-1.12852e-17	2.35553e-17	6.67401e-18	9.07703e-18	-6.22029e-18	-1.03913e-16	3.91675e-18	3.6172e-17	-9.55185e-17	-9.59444e-17	6.37725e-17	-1.29787e-17	-2.72423e-17	-3.70051e-17	-1.09779e-16	7.46183e-17	1.93507e-15	1.68073e-15	-1.2751e-15	1.53992e-15	5.86013e-17
-0.00609092	0.0732109	-0.400569	0.0061146	0.0271308	0.00161482	-0.00444697	-0.00409319	0.00084244	-0.000732472	0.000812967	4.58888e-05	0.000288028	0.000131288	-9.96538e-05	0.000284001	0.000295819	0.000182247	0.00310872	-0.00965079	0.00133113	0.00481709	-0.00224233	-0.00682715	-0.0111183	-0.00538162	-0.0611908	0.124798	-0.238173	-0.0713215	0.0225147	-0.0133199	-0.00267937	0.004024	0.0222879	-0.0161694	0.00170799	-0.0179428	-0.00467028	-0.000215138	-0.00130819	-0.00600137	-0.00345356	-0.000958438	-0.000729028	0.000735717	0.000189675	-0.001294	0.00154024	0.000219889
4.20262e-08	9.59785e-09	1.54977e-07	-8.10723e-08	-2.62199e-08	-7.65359e-09	-4.76325e-07	7.16665e-07	4.65353e-06	8.56516e-06	8.39717e-07	1.35621e-06	-9.83714e-05	0.000167473	-4.35534e-05	8.97871e-05	0.000192343	0.000948943	-0.00409833	0.00440321	0.00198909	-0.00889677	-0.0018821	-0.000252516	0.004571	0.022188	0.00444247	-0.0139499	0.0768712	-0.0734745	0.0457553	-0.0254153	-0.00281562	0.107986	0.373089	-0.113628	0.00821375	-0.0590602	-0.109976	-0.0884188	0.0984607	-0.244368	-0.0952476	-0.0739486	-0.0369243	-0.0138301	-0.0123069	-0.0179804	0.00919127	-0.00342374
5.46808e-36	-2.26705e-35	-2.24951e-36	1.43791e-35	1.6752e-35	3.76192e-35	-9.16457e-36	-1.43918e-35	-7.85924e-34	-1.18731e-33	1.08451e-33	-1.98766e-33	-9.91407e-33	-1.01173e-32	1.17191e-32	-5.38547e-32	4.76609e-32	-1.06212e-30	-4.85387e-31	-2.066e-31	-7.14289e-31	6.00177e-31	-5.18337e-31	1.05837e-30	-7.53508e-31	3.17037e-31	-1.70567e-30	1.52983e-30	-3.00123e-30	2.61813e-30	6.72604e-31	-1.55014e-30	3.3211e-30	5.76496e-30	1.79301e-29	2.90206e-29	2.8938e-29	2.21921e-29	-1.46323e-29	1.26777e-29	8.30249e-30	4.71829e-30	-1.61241e-29	1.86433e-29	5.97487e-29	6.16877e-30	-5.92605e-29	2.07531e-29	1.12359e-28	1.19846e-29
-2.00123e-29	-4.35292e-29	3.19479e-29	8.75502e-30	-1.083e-28	2.851e-29	2.69432e-29	-7.40969e-29	1.38546e-27	1.61128e-27	1.39226e-27	2.20346e-26	1.0677e-26	7.52954e-28	1.22809e-27	1.11741e-25	-1.84258e-25	-1.03243e-24	-7.34962e-25	-4.6036e-25	1.19966e-25	7.08747e-26	-2.37595e-24	3.35492e-24	4.11467e-24	-2.53105e-24	-2.8162e-26	6.59342e-25	-6.09539e-24	8.22771e-24	1.59698e-23	2.62845e-24	1.36616e-23	-1.80597e-24	7.26704e-24	-4.18348e-24	-6.10342e-24	-2.36656e-23	1.52628e-23	-1.10191e-23	1.46882e-23	1.32655e-23	-1.41175e-23	-2.48759e-23	-3.45585e-23	-8.8171e-23	1.07859e-22	2.29422e-22	-1.66476e-23	-3.33218e-22
-8.31959e-29	-2.58587e-28	-1.60963e-28	9.67497e-28	-1.00146e-27	5.84892e-28	3.31009e-28	4.66325e-26	4.78665e-26	2.71138e-25	-1.0329e-25	6.05591e-24	2.34638e-23	-1.06435e-24	-3.0443e-24	2.18513e-22	4.84363e-23	2.02549e-19	-1.4076e-18	-8.94288e-19	9.34913e-19	-5.63429e-18	-5.57983e-18	-4.31148e-18	1.20982e-17	1.06094e-16	5.20222e-17	-1.77709e-17	-5.33678e-17	-1.84897e-17	3.85931e-17	1.09347e-17	1.48718e-17	-1.01913e-17	-1.70251e-16	6.41721e-18	5.92643e-17	-1.56498e-16	-1.57195e-16	1.04485e-16	-2.12643e-17	-4.46339e-17	-6.06292e-17	-1.79862e-16	1.22255e-16	3.17043e-15	2.75371e-15	-2.08913e-15	2.523e-15	9.60125e-17
-9.69244e-33	5.01809e-34	-3.24253e-32	7.1379e-32	-4.27038e-32	1.54785e-32	2.67828e-32	-6.0344e-32	9.70093e-31	9.33318e-31	-2.99049e-30	1.9898e-29	7.10255e-30	6.15312e-30	-1.36349e-29	-7.25376e-29	-7.39598e-29	4.74291e-28	4.17983e-28	1.96763e-27	-2.30075e-27	2.8311e-28	-1.678e-27	-1.01647e-27	2.25706e-27	-9.59129e-28	-3.75533e-27	1.01158e-27	-2.8574e-27	-1.63399e-27	5.85681e-27	-7.25534e-27	1.01722e-26	-2.53417e-29	6.21661e-27	2.52474e-27	-3.72944e-27	-9.9363e-27	1.08494e-26	4.55778e-27	1.64768e-26	-7.74561e-27	-5.12916e-27	1.96443e-27	6.76904e-26	4.91719e-26	-1.07636e-26	-6.02682e-26	-1.50033e-25	6.73766e-26
-4.80952e-29	-1.49024e-28	-9.20211e-29	5.57056e-28	-5.75937e-28	3.37316e-28	1.90723e-28	2.68546e-26	2.75727e-26	1.56127e-25	-5.94551e-26	3.4874e-24	1.35116e-23	-6.12826e-25	-1.75305e-24	1.25831e-22	2.78914e-23	1.16637e-19	-8.10565e-19	-5.14974e-19	5.38368e-19	-3.24449e-18	-3.21313e-18	-2.48275e-18	6.96675e-18	6.10942e-17	2.99569e-17	-1.02333e-17	-3.07317e-17	-1.06472e-17	2.22237e-17	6.29673e-18	8.56391e-18	-5.86866e-18	-9.80389e-17	3.69534e-18	3.41272e-17	-9.01188e-17	-9.05206e-17	6.01674e-17	-1.2245e-17	-2.57023e-17	-3.49132e-17	-1.03573e-16	7.04001e-17	1.82568e-15	1.58572e-15	-1.20302e-15	1.45286e-15	5.52886e-17
-4.12626e-29	-1.28044e-28	-7.94662e-29	4.7969e-28	-4.96024e-28	2.91855e-28	1.64943e-28	2.31647e-26	2.37537e-26	1.3466e-25	-5.12497e-26	3.00815e-24	1.16551e-23	-5.28391e-25	-1.51221e-24	1.08544e-22	2.4058e-23	1.00612e-19	-6.99196e-19	-4.44218e-19	4.64398e-19	-2.79871e-18	-2.77166e-18	-2.14163e-18	6.00954e-18	5.27001e-17	2.58409e-17	-8.8273e-18	-2.65093e-17	-9.18434e-18	1.91703e-17	5.43158e-18	7.38725e-18	-5.06232e-18	-8.45687e-17	3.18761e-18	2.94382e-17	-7.77368e-17	-7.80834e-17	5.19006e-17	-1.05626e-17	-2.21709e-17	-3.01162e-17	-8.93427e-17	6.07274e-17	1.57484e-15	1.36785e-15	-1.03773e-15	1.25325e-15	4.76921e-17
1.73398e-30	5.39046e-30	3.33478e-30	-2.01506e-29	2.08421e-29	-1.2181e-29	-6.87581e-30	-9.70855e-28	-9.98074e-28	-5.64544e-27	2.15095e-27	-1.26092e-25	-4.88539e-25	2.21563e-26	6.33873e-26	-4.5497e-24	-1.00846e-24	-4.21726e-21	2.93076e-20	1.86199e-20	-1.94658e-20	1.17311e-19	1.16177e-19	8.9769e-20	-2.51897e-19	-2.20899e-18	-1.08315e-18	3.70006e-19	1.11117e-18	3.84972e-19	-8.03544e-19	-2.27671e-19	-3.09645e-19	2.12193e-19	3.54479e-18	-1.33612e-19	-1.23394e-18	3.25843e-18	3.27296e-18	-2.17548e-18	4.42743e-19	9.2932e-19	1.26236e-18	3.7449e-18	-2.54546e-18	-6.60113e-17	-5.73349e-17	4.34977e-17	-5.25313e-17	-1.99907e-18
-2.58668e-30	-8.02085e-30	-4.95422e-30	3.00333e-29	-3.10492e-29	1.82258e-29	1.02702e-29	1.44862e-27	1.48841e-27	8.42222e-27	-3.20481e-27	1.88125e-25	7.28878e-25	-3.30559e-26	-9.45667e-26	6.78797e-24	1.50459e-24	6.292e-21	-4.37259e-20	-2.77802e-20	2.90422e-20	-1.75024e-19	-1.73332e-19	-1.33932e-19	3.75821e-19	3.29573e-18	1.61602e-18	-5.52036e-19	-1.65782e-18	-5.74365e-19	1.19886e-18	3.39677e-19	4.6198e-19	-3.16585e-19	-5.28871e-18	1.99345e-19	1.84099e-18	-4.86146e-18	-4.88313e-18	3.24573e-18	-6.60556e-19	-1.38651e-18	-1.88339e-18	-5.58726e-18	3.79773e-18	9.84865e-17	8.55416e-17	-6.4897e-17	7.83748e-17	2.98254e-18
-1.14171e-07	-5.11437e-07	1.82122e-07	-1.29606e-06	-1.97585e-07	-1.10766e-06	7.63029e-07	-1.91222e-06	-1.36394e-05	6.65524e-06	4.41371e-07	-3.78091e-05	-0.000108715	2.01417e-05	-0.000299177	0.000374873	-0.00245626	0.00354214	0.00318824	0.025588	-0.00518588	0.0409364	0.00368664	0.0214096	-0.406492	0.0579989	0.0946703	-0.0230959	-0.0161904	-0.0110328	-0.00228888	0.0492087	0.096861	-0.313339	0.0326702	-0.0351431	0.0489856	-0.0596812	0.0140197	-0.0398236	0.0683282	-0.0101502	-0.00346354	-0.0640824	-0.00287793	-0.0102444	0.108995	0.0691451	-0.0663942	-0.0363286
2.26826e-29	7.03871e-29	4.37871e-29	-2.6373e-28	2.72798e-28	-1.59943e-28	-9.05025e-29	-1.27198e-26	-1.30537e-26	-7.3943e-26	2.81606e-26	-1.65178e-24	-6.39983e-24	2.90227e-25	8.30375e-25	-5.96008e-23	-1.32107e-23	-5.52461e-20	3.8393e-19	2.43921e-19	-2.55002e-19	1.53678e-18	1.52192e-18	1.17597e-18	-3.29985e-18	-2.89377e-17	-1.41893e-17	4.84708e-18	1.45563e-17	5.04314e-18	-1.05264e-17	-2.98249e-18	-4.05635e-18	2.77973e-18	4.64368e-17	-1.75032e-18	-1.61646e-17	4.26854e-17	4.28757e-17	-2.84987e-17	5.79993e-18	1.21741e-17	1.65369e-17	4.90582e-17	-3.33455e-17	-8.64748e-16	-7.51087e-16	5.69819e-16	-6.8816e-16	-2.61878e-17
2.28629e-09	1.06209e-08	-4.27078e-09	4.30501e-09	3.03125e-09	-2.76696e-09	1.53682e-08	-2.9138e-08	-9.00839e-08	4.14057e-07	-1.60517e-08	-1.04073e-06	-4.32612e-06	-5.86144e-06	9.09018e-07	4.48947e-07	2.47543e-06	-0.000121772	1.97545e-06	7.33584e-05	-3.86265e-05	-6.57148e-05	-0.000307316	-0.000232929	0.00125169	0.000375254	-0.000809705	-0.00068398	-0.000888062	0.00243748	-0.00487167	0.00124971	0.00242958	-0.00217355	0.000903467	0.000660248	-0.00279948	-0.00580372	-0.000848754	-0.00394896	-0.00457148	0.0036347	-0.000946363	-0.000615704	-0.0429759	0.00430379	-0.00875664	0.0052809	0.0117103	-0.00733438
9.53866e-32	2.96295e-31	1.8344e-31	-1.1063e-30	1.14504e-30	-6.68678e-31	-3.7698e-31	-5.33154e-29	-5.47745e-29	-3.09995e-28	1.18066e-28	-6.92378e-27	-2.68261e-26	1.21692e-27	3.48036e-27	-2.49825e-25	-5.53771e-26	-2.31573e-22	1.6093e-21	1.02243e-21	-1.06888e-21	6.44165e-21	6.37938e-21	4.92928e-21	-1.38318e-20	-1.21297e-19	-5.94766e-20	2.03173e-20	6.10151e-20	2.11391e-20	-4.41232e-20	-1.25016e-20	-1.70028e-20	1.16517e-20	1.94647e-19	-7.33675e-21	-6.77564e-20	1.78923e-19	1.7972e-19	-1.19457e-19	2.43113e-20	5.10296e-20	6.93169e-20	2.05635e-19	-1.39773e-19	-3.62473e-18	-3.1483e-18	2.38849e-18	-2.88453e-18	-1.0977e-19
-8.80457e-29	-2.73225e-28	-1.68044e-28	1.02108e-27	-1.05455e-27	6.17453e-28	3.48745e-28	4.91577e-26	5.05175e-26	2.85792e-25	-1.08892e-25	6.3838e-24	2.47339e-23	-1.12152e-24	-3.20926e-24	2.30344e-22	5.10567e-23	2.13514e-19	-1.4838e-18	-9.427e-19	9.85524e-19	-5.9393e-18	-5.88189e-18	-4.54488e-18	1.27532e-17	1.11838e-16	5.48384e-17	-1.87329e-17	-5.62569e-17	-1.94906e-17	4.06823e-17	1.15267e-17	1.56769e-17	-1.0743e-17	-1.79468e-16	6.76461e-18	6.24725e-17	-1.6497e-16	-1.65705e-16	1.10141e-16	-2.24154e-17	-4.70501e-17	-6.39113e-17	-1.89599e-16	1.28873e-16	3.34206e-15	2.90278e-15	-2.20222e-15	2.65958e-15	1.0121e-16
-8.7838e-29	-2.72736e-28	-1.68534e-28	1.02064e-27	-1.05482e-27	6.17499e-28	3.48796e-28	4.91576e-26	5.05155e-26	2.85791e-25	-1.08892e-25	6.38389e-24	2.47339e-23	-1.12149e-24	-3.20919e-24	2.30343e-22	5.10561e-23	2.13514e-19	-1.4838e-18	-9.427e-19	9.85524e-19	-5.9393e-18	-5.88189e-18	-4.54488e-18	1.27532e-17	1.11838e-16	5.48384e-17	-1.87329e-17	-5.62569e-17	-1.94906e-17	4.06823e-17	1.15267e-17	1.56769e-17	-1.0743e-17	-1.79468e-16	6.76461e-18	6.24725e-17	-1.6497e-16	-1.65705e-16	1.10141e-16	-2.24154e-17	-4.70501e-17	-6.39113e-17	-1.89599e-16	1.28873e-16	3.34206e-15	2.90278e-15	-2.20222e-15	2.65958e-15	1.0121e-16
4.1639e-08	9.92405e-09	1.53997e-07	-7.92244e-08	-2.59924e-08	-9.11072e-09	-4.71191e-07	7.13206e-07	4.60378e-06	8.51983e-06	7.84894e-07	8.03193e-07	-9.80936e-05	0.00016552	-4.30241e-05	9.0117e-05	0.000191872	0.000926054	-0.0040648	0.00433737	0.00194866	-0.00882019	-0.00180161	-0.000237548	0.00452686	0.0220833	0.00436767	-0.0140937	0.0762709	-0.07317	0.0451554	-0.0248275	-0.00280911	0.10735	0.370438	-0.112718	0.0079538	-0.0587105	-0.108964	-0.0877872	0.0978251	-0.242253	-0.0948093	-0.0734558	-0.0370898	-0.0147924	-0.00878414	-0.0186129	0.00671486	-0.00539369
-0.00609092	0.0732109	-0.400569	0.0061146	0.0271308	0.00161482	-0.00444697	-0.00409319	0.00084244	-0.000732472	0.000812967	4.58888e-05	0.000288028	0.000131288	-9.96538e-05	0.000284001	0.000295819	0.000182247	0.00310872	-0.00965079	0.00133113	0.00481709	-0.00224233	-0.00682715	-0.0111183	-0.00538162	-0.0611908	0.124798	-0.238173	-0.0713215	0.0225147	-0.0133199	-0.00267937	0.004024	0.0222879	-0.0161694	0.00170799	-0.0179428	-0.00467028	-0.000215138	-0.00130819	-0.00600137	-0.00345356	-0.000958438	-0.000729028	0.000735717	0.000189675	-0.001294	0.00154024	0.000219889
-1.02721e-29	-3.19019e-29	-1.97189e-29	1.19355e-28	-1.23381e-28	7.23799e-29	4.08914e-29	5.75621e-27	5.90816e-27	3.34669e-26	-1.27421e-26	7.47564e-25	2.8963e-24	-1.31345e-25	-3.75791e-25	2.69731e-23	5.97869e-24	2.50023e-20	-1.73752e-19	-1.10389e-19	1.15404e-19	-6.95488e-19	-6.88766e-19	-5.32202e-19	1.49339e-18	1.30961e-17	6.42154e-18	-2.19361e-18	-6.58764e-18	-2.28234e-18	4.76387e-18	1.34976e-18	1.83575e-18	-1.258e-18	-2.10156e-17	7.92131e-19	7.31549e-18	-1.93178e-17	-1.9404e-17	1.28975e-17	-2.62483e-18	-5.50954e-18	-7.48397e-18	-2.22019e-17	1.50909e-17	3.91353e-16	3.39914e-16	-2.57879e-16	3.11435e-16	1.18516e-17
-3.57401e-34	-8.96492e-34	-2.60149e-34	-1.2018e-33	2.32087e-33	-5.95396e-33	4.07247e-33	-6.43499e-35	-1.36462e-32	-3.72383e-32	-8.23108e-32	-3.43285e-31	4.90953e-31	-1.06912e-30	-6.98062e-31	8.49593e-31	3.32734e-31	-3.31647e-29	-1.80278e-29	4.38013e-29	7.62602e-29	1.5744e-30	2.06779e-29	-1.04647e-28	1.90714e-28	7.28915e-29	1.47658e-28	3.23562e-28	2.26358e-28	1.89836e-28	7.32628e-28	7.1261e-29	-2.93586e-28	6.56665e-29	-3.47611e-28	-6.49487e-28	-3.21213e-28	1.8014e-28	1.46926e-27	-1.45937e-27	-5.89751e-28	3.71413e-28	8.91107e-28	-1.13722e-28	1.23311e-28	1.73473e-27	-1.85177e-27	2.15128e-27	-2.14169e-27	3.08808e-27
-2.58668e-30	-8.02085e-30	-4.95422e-30	3.00333e-29	-3.10492e-29	1.82258e-29	1.02702e-29	1.44862e-27	1.48841e-27	8.42222e-27	-3.20481e-27	1.88125e-25	7.28878e-25	-3.30559e-26	-9.45667e-26	6.78797e-24	1.50459e-24	6.292e-21	-4.37259e-20	-2.77802e-20	2.90422e-20	-1.75024e-19	-1.73332e-19	-1.33932e-19	3.75821e-19	3.29573e-18	1.61602e-18	-5.52036e-19	-1.65782e-18	-5.74365e-19	1.19886e-18	3.39677e-19	4.6198e-19	-3.16585e-19	-5.28871e-18	1.99345e-19	1.84099e-18	-4.86146e-18	-4.88313e-18	3.24573e-18	-6.60556e-19	-1.38651e-18	-1.88339e-18	-5.58726e-18	3.79773e-18	9.84865e-17	8.55416e-17	-6.4897e-17	7.83748e-17	2.98254e-18
-2.99524e-34	-9.30258e-34	-5.74999e-34	3.47261e-33	-3.59245e-33	2.10622e-33	1.1916e-33	1.67633e-31	1.71923e-31	9.74751e-31	-3.70964e-31	2.17675e-29	8.43419e-29	-3.82477e-30	-1.09426e-29	7.85466e-28	1.74105e-28	7.28077e-25	-5.05974e-24	-3.21458e-24	3.36061e-24	-2.02529e-23	-2.00571e-23	-1.54979e-23	4.34881e-23	3.81364e-22	1.86998e-22	-6.38788e-23	-1.91835e-22	-6.64625e-23	1.38726e-22	3.93056e-23	5.34579e-23	-3.66335e-23	-6.11981e-22	2.30672e-23	2.1303e-22	-5.62543e-22	-5.65051e-22	3.75579e-22	-7.64361e-23	-1.6044e-22	-2.17936e-22	-6.46529e-22	4.39454e-22	1.13963e-20	9.89843e-21	-7.50954e-21	9.06912e-21	3.45124e-22
-0.000151977	-0.000511186	-0.000817895	-0.000333946	0.00155555	-0.00137961	0.000602302	0.000519639	0.0007582	0.447101	-0.000842172	0.00268427	0.00351732	0.00153906	-0.00471436	0.000391951	-0.000210856	-0.000226501	0.000911878	-0.000915498	0.000198416	0.00119434	-0.00257327	-0.000177526	-0.0021941	0.000277719	0.00166929	-0.00347116	-0.00146284	-0.000505581	-0.00200418	0.00642216	-0.00814976	-0.0271592	0.00956778	0.0187519	0.0289104	-0.0123987	0.0295883	-0.0219487	0.0151326	-0.0519484	-0.0358813	0.203379	0.0169324	0.00248777	-0.00404239	-0.00678487	-0.00906873	0.00460299
-2.32567e-33	-7.22187e-33	-4.47293e-33	2.70487e-32	-2.79653e-32	1.64343e-32	9.26144e-33	1.30544e-30	1.34083e-30	7.5898e-30	-2.88819e-30	1.69529e-28	6.56842e-28	-2.97809e-29	-8.5222e-29	6.11713e-27	1.35589e-27	5.67017e-24	-3.94046e-23	-2.50348e-23	2.61721e-23	-1.57727e-22	-1.56202e-22	-1.20696e-22	3.3868e-22	2.97002e-21	1.45632e-21	-4.9748e-22	-1.49399e-21	-5.17602e-22	1.08038e-21	3.06107e-22	4.16324e-22	-2.85297e-22	-4.76604e-21	1.79644e-22	1.65905e-21	-4.38101e-21	-4.40055e-21	2.92497e-21	-5.95275e-22	-1.24949e-21	-1.69726e-21	-5.03509e-21	3.42241e-21	8.87533e-20	7.70878e-20	-5.84834e-20	7.06292e-20	2.68779e-21
-8.31959e-29	-2.58587e-28	-1.60963e-28	9.67497e-28	-1.00146e-27	5.84892e-28	3.31009e-28	4.66325e-26	4.78665e-26	2.71138e-25	-1.0329e-25	6.05591e-24	2.34638e-23	-1.06435e-24	-3.0443e-24	2.18513e-22	4.84363e-23	2.02549e-19	-1.4076e-18	-8.94288e-19	9.34913e-19	-5.63429e-18	-5.57983e-18	-4.31148e-18	1.20982e-17	1.06094e-16	5.20222e-17	-1.77709e-17	-5.33678e-17	-1.84897e-17	3.85931e-17	1.09347e-17	1.48718e-17	-1.01913e-17	-1.70251e-16	6.41721e-18	5.92643e-17	-1.56498e-16	-1.57195e-16	1.04485e-16	-2.12643e-17	-4.46339e-17	-6.06292e-17	-1.79862e-16	1.22255e-16	3.17043e-15	2.75371e-15	-2.08913e-15	2.523e-15	9.60125e-17
3.47085e-29	1.07879e-28	6.69946e-29	-4.03992e-28	4.17772e-28	-2.44721e-28	-1.3852e-28	-1.94746e-26	-1.99901e-26	-1.1321e-25	4.31214e-26	-2.52898e-24	-9.79866e-24	4.44337e-25	1.27139e-24	-9.12544e-23	-2.02269e-23	-8.45861e-20	5.87827e-19	3.73462e-19	-3.90428e-19	2.35293e-18	2.33019e-18	1.80051e-18	-5.05233e-18	-4.43059e-17	-2.17249e-17	7.42127e-18	2.22869e-17	7.72144e-18	-1.61168e-17	-4.56643e-18	-6.2106e-18	4.25599e-18	7.10984e-17	-2.67988e-18	-2.47493e-17	6.53548e-17	6.56461e-17	-4.36338e-17	8.88015e-18	1.86395e-17	2.53193e-17	7.51121e-17	-5.10546e-17	-1.324e-15	-1.14997e-15	8.72439e-16	-1.05363e-15	-4.00957e-17
6.7113e-30	2.08256e-29	1.2817e-29	-7.78383e-29	8.04001e-29	-4.72094e-29	-2.66214e-29	-3.75208e-27	-3.85034e-27	-2.1813e-26	8.30779e-27	-4.87253e-25	-1.88784e-24	8.55887e-26	2.44957e-25	-1.75814e-23	-3.89687e-24	-1.62967e-20	1.13253e-19	7.19527e-20	-7.52213e-20	4.53324e-19	4.48942e-19	3.46893e-19	-9.73402e-19	-8.53615e-18	-4.18561e-18	1.42981e-18	4.29387e-18	1.48764e-18	-3.10512e-18	-8.79785e-19	-1.19656e-18	8.19975e-19	1.36981e-17	-5.16317e-19	-4.76829e-18	1.25915e-17	1.26476e-17	-8.40666e-18	1.71088e-18	3.59116e-18	4.87811e-18	1.44714e-17	-9.83638e-18	-2.55086e-16	-2.21558e-16	1.68087e-16	-2.02996e-16	-7.72498e-18
5.34923e-31	-1.61962e-30	-5.08419e-31	-2.37102e-30	1.17675e-30	-3.27674e-30	-2.68956e-30	2.355e-31	7.35628e-29	-3.17062e-29	-2.98252e-28	8.20864e-29	4.52103e-29	1.13765e-27	-4.03279e-28	6.89663e-27	-1.25701e-27	2.22454e-26	-1.56156e-26	-1.14996e-26	5.59966e-26	-1.10148e-25	3.59608e-26	-7.92445e-27	5.41945e-26	-1.25498e-26	-1.12874e-25	-3.95329e-25	-4.39684e-25	8.70181e-25	1.88077e-25	6.74977e-26	6.53179e-25	3.01446e-25	-2.52371e-25	-1.45328e-24	3.61887e-24	2.26875e-24	8.9068e-25	1.5073e-25	-5.5905e-25	2.11801e-25	-1.89774e-24	-3.61757e-25	2.72921e-27	-6.76328e-25	5.07758e-24	-5.85281e-26	-2.72876e-24	1.52271e-23
1.69105e-31	2.46911e-31	6.71337e-31	1.92875e-30	-1.49307e-30	-2.528e-31	8.55599e-31	-7.55844e-31	1.77625e-29	4.09312e-29	-1.11666e-28	-8.85973e-29	-2.85958e-28	-9.98598e-28	9.0172e-29	2.40798e-28	8.8539e-28	-3.21222e-26	-1.91161e-26	-1.28591e-26	2.01188e-26	-1.31516e-26	2.61385e-26	-1.70885e-26	-7.7504e-26	2.86745e-26	-2.8259e-26	1.46238e-25	-7.76039e-26	-1.10748e-25	-1.33869e-25	2.28263e-25	4.43944e-25	2.19653e-25	-2.04359e-25	-9.54347e-25	2.93785e-25	1.08771e-25	7.9267e-25	2.85656e-25	8.21487e-25	6.46297e-26	-4.79603e-25	1.62554e-25	-3.74747e-26	1.56865e-25	-1.47238e-24	-1.5644e-24	1.58014e-24	6.41354e-24
-6.24503e-31	-1.9416e-30	-1.2059e-30	7.26134e-30	-7.51169e-30	4.38576e-30	2.48435e-30	3.49776e-28	3.591e-28	2.03365e-27	-7.74911e-28	4.54259e-26	1.76006e-25	-7.9826e-27	-2.28358e-26	1.6391e-24	3.6332e-25	1.51934e-21	-1.05586e-20	-6.70816e-21	7.01289e-21	-4.22635e-20	-4.1855e-20	-3.23409e-20	9.07504e-20	7.95826e-19	3.90225e-19	-1.33301e-19	-4.00318e-19	-1.38693e-19	2.89491e-19	8.20225e-20	1.11555e-19	-7.64464e-20	-1.27708e-18	4.81363e-20	4.44548e-19	-1.17391e-18	-1.17914e-18	7.83754e-19	-1.59506e-19	-3.34804e-19	-4.54786e-19	-1.34917e-18	9.17047e-19	2.37817e-17	2.06559e-17	-1.56708e-17	1.89253e-17	7.20201e-19
6.569e-34	-2.45682e-32	1.21515e-32	-4.06125e-33	-2.83733e-33	7.73704e-33	-9.18566e-32	-1.46895e-32	-8.65181e-31	7.20268e-31	7.73443e-31	8.4895e-30	-1.35616e-29	1.46411e-29	-1.04492e-29	-2.2061e-29	4.22996e-29	6.17074e-28	-1.01619e-28	-9.98815e-28	2.78727e-28	-9.35343e-28	1.0539e-27	7.38829e-28	-2.29019e-27	-2.41861e-28	-5.15699e-28	4.76871e-27	-2.75866e-27	2.63532e-27	6.63643e-27	6.3235e-27	-1.71847e-26	-5.61244e-27	-3.0348e-28	2.53556e-27	-4.59314e-27	-6.39691e-27	2.03885e-27	1.01178e-26	-9.81927e-28	8.31455e-27	3.05875e-27	-1.80342e-27	1.93918e-27	2.96248e-26	5.1328e-26	1.18825e-25	-2.89893e-26	-8.40121e-26
-1.98355e-30	-6.15794e-30	-3.80247e-30	2.30371e-29	-2.38133e-29	1.39339e-29	7.88976e-30	1.10966e-27	1.14015e-27	6.45082e-27	-2.45745e-27	1.44109e-25	5.58331e-25	-2.53255e-26	-7.24429e-26	5.19965e-24	1.15253e-24	4.81972e-21	-3.34944e-20	-2.12799e-20	2.22466e-20	-1.3407e-19	-1.32774e-19	-1.02593e-19	2.87882e-19	2.52455e-18	1.23789e-18	-4.22864e-19	-1.26991e-18	-4.39968e-19	9.18336e-19	2.60195e-19	3.5388e-19	-2.42507e-19	-4.05119e-18	1.527e-19	1.41022e-18	-3.72392e-18	-3.74052e-18	2.48626e-18	-5.05992e-19	-1.06208e-18	-1.44269e-18	-4.27989e-18	2.9091e-18	7.54415e-17	6.55256e-17	-4.97116e-17	6.00357e-17	2.28465e-18
-1.18764e-21	1.52634e-22	5.03552e-21	-6.84204e-21	1.81905e-22	-4.57832e-21	-7.63329e-21	1.77999e-20	1.36473e-19	-2.22436e-19	3.03955e-19	-1.40763e-18	-3.73114e-18	5.0134e-18	6.09314e-19	5.07629e-18	5.11941e-18	1.58777e-16	-7.7095e-17	-4.07021e-17	2.52778e-17	-1.53155e-16	5.44082e-17	5.52831e-17	1.58209e-16	5.63508e-16	4.5488e-16	-2.5111e-16	1.47763e-15	-1.17768e-15	1.05864e-15	-2.09322e-15	-3.93669e-16	2.75662e-15	9.34677e-15	-1.0918e-15	1.00149e-15	-3.28957e-16	-2.98069e-15	-2.21368e-15	2.82494e-15	-5.43496e-15	-1.3784e-15	-2.14907e-15	-6.23625e-17	3.65601e-15	-5.11052e-17	1.07171e-14	-4.67633e-15	-7.39826e-15
-1.14218e-06	1.26233e-05	2.77726e-05	5.55234e-05	-1.46721e-05	2.17946e-05	-1.10995e-05	6.55783e-05	0.000762921	7.67278e-05	-7.71235e-06	0.00490601	0.0257625	0.0118973	0.0157312	-0.0345188	0.497728	-0.00321576	0.00382158	-0.00109146	-0.00161945	4.67904e-05	0.000165448	-0.000524868	-0.00243235	0.000634369	0.000604623	-0.000161377	0.000505894	0.000792621	-0.000459645	0.000941722	-4.13841e-05	-0.000466143	7.70129e-08	-0.00102854	0.00149001	-0.00238809	-0.00127063	0.00113897	0.000776743	-0.000909378	-0.00121581	0.000510231	0.000113588	-0.000386734	-0.00639384	-0.000262219	-0.00413219	-0.00122802
2.26826e-29	7.03871e-29	4.37871e-29	-2.6373e-28	2.72798e-28	-1.59943e-28	-9.05025e-29	-1.27198e-26	-1.30537e-26	-7.3943e-26	2.81606e-26	-1.65178e-24	-6.39983e-24	2.90227e-25	8.30375e-25	-5.96008e-23	-1.32107e-23	-5.52461e-20	3.8393e-19	2.43921e-19	-2.55002e-19	1.53678e-18	1.52192e-18	1.17597e-18	-3.29985e-18	-2.89377e-17	-1.41893e-17	4.84708e-18	1.45563e-17	5.04314e-18	-1.05264e-17	-2.98249e-18	-4.05635e-18	2.77973e-18	4.64368e-17	-1.75032e-18	-1.61646e-17	4.26854e-17	4.28757e-17	-2.84987e-17	5.79993e-18	1.21741e-17	1.65369e-17	4.90582e-17	-3.33455e-17	-8.64748e-16	-7.51087e-16	5.69819e-16	-6.8816e-16	-2.61878e-17
2.93156e-29	9.10167e-29	5.6626e-29	-3.40349e-28	3.52606e-28	-2.05341e-28	-1.15912e-28	-1.63944e-26	-1.68602e-26	-9.53285e-26	3.63264e-26	-2.12908e-24	-8.24946e-24	3.74218e-25	1.07035e-24	-7.68243e-23	-1.70289e-23	-7.12114e-20	4.9488e-19	3.14411e-19	-3.28693e-19	1.98088e-18	1.96174e-18	1.51581e-18	-4.25346e-18	-3.73003e-17	-1.82898e-17	6.24782e-18	1.87629e-17	6.50053e-18	-1.35684e-17	-3.84439e-18	-5.22858e-18	3.58303e-18	5.98564e-17	-2.25614e-18	-2.08359e-17	5.50209e-17	5.52662e-17	-3.67345e-17	7.47603e-18	1.56922e-17	2.13158e-17	6.32354e-17	-4.29819e-17	-1.11465e-15	-9.68141e-16	7.34489e-16	-8.87028e-16	-3.37557e-17
4.05168e-30	1.25547e-29	7.72148e-30	-4.68275e-29	4.84519e-29	-2.83291e-29	-1.5984e-29	-2.25741e-27	-2.3198e-27	-1.31262e-26	4.99806e-27	-2.93168e-25	-1.13585e-24	5.15216e-26	1.47371e-25	-1.0578e-23	-2.3447e-24	-9.80512e-21	6.81402e-20	4.32913e-20	-4.52579e-20	2.72749e-19	2.70112e-19	2.08713e-19	-5.8566e-19	-5.13589e-18	-2.51833e-18	8.60265e-19	2.58347e-18	8.9506e-19	-1.86824e-18	-5.29335e-19	-7.19926e-19	4.93349e-19	8.24165e-18	-3.10649e-19	-2.86891e-18	7.57585e-18	7.60962e-18	-5.05798e-18	1.02938e-18	2.16067e-18	2.93498e-18	8.7069e-18	-5.91819e-18	-1.53476e-16	-1.33304e-16	1.01132e-16	-1.22135e-16	-4.64784e-18
-2.12348e-30	-6.58161e-30	-4.04254e-30	2.45143e-29	-2.53593e-29	1.48489e-29	8.37331e-30	1.18251e-27	1.21406e-27	6.87573e-27	-2.61727e-27	1.53557e-25	5.94968e-25	-2.69769e-26	-7.71952e-26	5.5409e-24	1.22816e-24	5.13602e-21	-3.56925e-20	-2.26764e-20	2.37065e-20	-1.42868e-19	-1.41487e-19	-1.09326e-19	3.06774e-19	2.69023e-18	1.31912e-18	-4.50615e-19	-1.35324e-18	-4.68841e-19	9.78601e-19	2.77271e-19	3.77104e-19	-2.58421e-19	-4.31705e-18	1.62721e-19	1.50276e-18	-3.9683e-18	-3.98599e-18	2.64942e-18	-5.39197e-19	-1.13178e-18	-1.53737e-18	-4.56076e-18	3.10001e-18	8.03923e-17	6.98257e-17	-5.29739e-17	6.39756e-17	2.43458e-18
3.39004e-29	1.05281e-28	6.48008e-29	-3.93949e-28	4.06901e-28	-2.39765e-28	-1.35092e-28	-1.90028e-26	-1.95053e-26	-1.10468e-25	4.20608e-26	-2.46783e-24	-9.56126e-24	4.33433e-25	1.24059e-24	-8.90451e-23	-1.97361e-23	-8.25377e-20	5.73592e-19	3.64418e-19	-3.80973e-19	2.29595e-18	2.27376e-18	1.75691e-18	-4.92998e-18	-4.3233e-17	-2.11988e-17	7.24155e-18	2.17472e-17	7.53446e-18	-1.57265e-17	-4.45584e-18	-6.0602e-18	4.15292e-18	6.93767e-17	-2.61499e-18	-2.41499e-17	6.37721e-17	6.40564e-17	-4.25772e-17	8.66511e-18	1.81881e-17	2.47061e-17	7.32931e-17	-4.98183e-17	-1.29194e-15	-1.12213e-15	8.51311e-16	-1.02811e-15	-3.91247e-17
1.54738e-33	4.80632e-33	2.97188e-33	-1.79585e-32	1.85715e-32	-1.09012e-32	-6.16034e-33	-8.66938e-31	-8.88934e-31	-5.04017e-30	1.91869e-30	-1.12582e-28	-4.36192e-28	1.97754e-29	5.65935e-29	-4.06224e-27	-9.00391e-28	-3.76541e-24	2.61675e-23	1.66249e-23	-1.73802e-23	1.04742e-22	1.0373e-22	8.01509e-23	-2.24908e-22	-1.97231e-21	-9.671e-22	3.30363e-22	9.92115e-22	3.43725e-22	-7.1745e-22	-2.03278e-22	-2.76469e-22	1.89458e-22	3.16499e-21	-1.19297e-22	-1.10173e-21	2.90931e-21	2.92228e-21	-1.94239e-21	3.95306e-22	8.2975e-22	1.1271e-21	3.34366e-21	-2.27273e-21	-5.89386e-20	-5.11919e-20	3.88372e-20	-4.69029e-20	-1.78488e-21
0.00609088	-0.0732109	0.400569	-0.00611506	-0.0271301	-0.00161503	0.00444862	0.00409277	-0.000849729	0.000711296	-0.000837826	-0.000186226	0.000630771	0.000150149	-0.000266361	0.000617593	0.000540448	0.000366246	0.00621558	-0.0193003	0.00266405	0.00963383	-0.00448541	-0.0136541	-0.0222354	-0.0107637	-0.122382	0.249596	-0.476345	-0.142642	0.0450294	-0.0266398	-0.00535889	0.00804793	0.0445757	-0.0323387	0.00341582	-0.0358855	-0.00934074	-0.000430338	-0.00261668	-0.0120025	-0.00690722	-0.00191683	-0.0014581	0.00147141	0.000379362	-0.002588	0.00308049	0.000439789
-3.39892e-30	-1.05523e-29	-6.54197e-30	3.94692e-29	-4.08391e-29	2.38253e-29	1.34428e-29	1.90026e-27	1.9558e-27	1.10484e-26	-4.21059e-27	2.46779e-25	9.56147e-25	-4.3378e-26	-1.2406e-25	8.90437e-24	1.97375e-24	8.25377e-21	-5.73592e-20	-3.64418e-20	3.80973e-20	-2.29595e-19	-2.27376e-19	-1.75691e-19	4.92998e-19	4.3233e-18	2.11988e-18	-7.24155e-19	-2.17472e-18	-7.53446e-19	1.57265e-18	4.45584e-19	6.0602e-19	-4.15292e-19	-6.93767e-18	2.61499e-19	2.41499e-18	-6.37721e-18	-6.40564e-18	4.25772e-18	-8.66511e-19	-1.81881e-18	-2.47061e-18	-7.32931e-18	4.98183e-18	1.29194e-16	1.12213e-16	-8.51311e-17	1.02811e-16	3.91247e-18
3.27077e-27	1.01568e-26	6.25253e-27	-3.79179e-26	3.91772e-26	-2.29368e-26	-1.29542e-26	-1.8269e-24	-1.87749e-24	-1.06218e-23	4.0455e-24	-2.37247e-22	-9.19238e-22	4.16822e-23	1.19265e-22	-8.56067e-21	-1.8975e-21	-7.93519e-18	5.51452e-17	3.50352e-17	-3.66268e-17	2.20733e-16	2.18599e-16	1.68909e-16	-4.73969e-16	-4.15643e-15	-2.03806e-15	6.96204e-16	2.09077e-15	7.24364e-16	-1.51195e-15	-4.28386e-16	-5.82629e-16	3.99263e-16	6.66988e-15	-2.51405e-16	-2.32178e-15	6.13106e-15	6.15839e-15	-4.09338e-15	8.33065e-16	1.74861e-15	2.37525e-15	7.04641e-15	-4.78954e-15	-1.24207e-13	-1.07881e-13	8.18452e-14	-9.88428e-14	-3.76145e-15
3.93945e-27	1.61774e-26	-1.53957e-26	3.70951e-27	3.71429e-26	-4.96783e-26	-1.11892e-26	-4.15119e-27	-4.96825e-25	3.68731e-25	-2.24494e-24	1.86418e-24	9.70061e-24	1.54645e-24	-4.41412e-24	-4.53408e-23	-1.79104e-23	2.65201e-22	-2.40948e-22	-2.61894e-22	-5.57103e-22	-1.36895e-22	3.90172e-22	-1.67376e-22	1.07954e-21	-1.03452e-21	3.46976e-21	6.77686e-22	-2.79388e-21	5.13173e-22	-2.3128e-21	3.39955e-22	3.03804e-21	2.16363e-21	1.7186e-21	-1.2408e-21	2.54381e-21	-1.37422e-20	-1.14047e-20	1.09563e-20	1.09988e-21	-1.01653e-20	-3.60046e-21	4.0995e-21	4.81582e-20	-2.30571e-20	5.40968e-20	1.9672e-20	1.56404e-19	-3.39858e-20
1.59794e-33	3.07793e-33	-5.75903e-33	-1.99999e-33	1.09124e-32	-1.77767e-32	-1.36282e-33	-2.04765e-33	-3.14992e-32	1.53144e-31	-9.26968e-31	4.35039e-31	2.27204e-30	2.26447e-30	-1.42276e-30	-6.85307e-30	-2.39385e-30	1.46907e-28	-5.95745e-29	-5.18928e-29	-1.3423e-28	-1.29608e-28	1.53932e-28	-5.63978e-29	3.96412e-28	-2.88901e-28	8.28896e-28	-1.76449e-28	-1.21092e-27	1.00414e-27	-3.48444e-28	1.68881e-28	1.1909e-27	7.61546e-28	2.44603e-28	-2.04987e-27	4.28493e-27	-1.52619e-27	-2.38573e-27	3.78055e-27	2.82831e-28	-2.57613e-27	-2.5777e-27	9.49305e-28	1.45119e-26	-6.77112e-27	1.9591e-26	6.2448e-27	4.06936e-26	1.23114e-26
4.56618e-29	1.87523e-28	-1.78156e-28	4.23187e-29	4.29649e-28	-5.74948e-28	-1.29693e-28	-4.81121e-29	-5.75734e-27	4.26769e-27	-2.59876e-26	2.16184e-26	1.12235e-25	1.77551e-26	-5.12664e-26	-5.24617e-25	-2.08244e-25	3.07464e-24	-2.79355e-24	-3.02818e-24	-6.45265e-24	-1.5876e-24	4.51917e-24	-1.94282e-24	1.24789e-23	-1.19506e-23	4.01617e-23	7.843e-24	-3.23612e-23	5.91455e-24	-2.68072e-23	3.99001e-24	3.52502e-23	2.4805e-23	2.01373e-23	-1.4171e-23	2.95592e-23	-1.5927e-22	-1.31973e-22	1.26606e-22	1.29872e-23	-1.17907e-22	-4.19572e-23	4.79345e-23	5.57639e-22	-2.66812e-22	6.26493e-22	2.27878e-22	1.80997e-21	-3.93113e-22
1.89981e-28	5.88589e-28	3.61806e-28	-2.19973e-27	2.27293e-27	-1.33234e-27	-7.51614e-28	-1.05979e-25	-1.08867e-25	-6.16142e-25	2.34677e-25	-1.37616e-23	-5.33203e-23	2.41788e-24	6.9184e-24	-4.96567e-22	-1.10064e-22	-4.60283e-19	3.19872e-18	2.03223e-18	-2.12455e-18	1.28037e-17	1.26799e-17	9.79764e-18	-2.74927e-17	-2.41095e-16	-1.18218e-16	4.03836e-17	1.21276e-16	4.2017e-17	-8.7701e-17	-2.48487e-17	-3.37956e-17	2.31594e-17	3.86889e-16	-1.45828e-17	-1.34676e-16	3.55634e-16	3.5722e-16	-2.37438e-16	4.83222e-17	1.01429e-16	1.37777e-16	4.0873e-16	-2.77819e-16	-7.20466e-15	-6.2577e-15	4.74746e-15	-5.73341e-15	-2.18184e-16
3.34905e-30	1.03987e-29	6.42527e-30	-3.89074e-29	4.0205e-29	-2.361e-29	-1.3311e-29	-1.87604e-27	-1.92517e-27	-1.09066e-26	4.15384e-27	-2.43628e-25	-9.4392e-25	4.27922e-26	1.22477e-25	-8.79067e-24	-1.94843e-24	-8.14834e-21	5.66265e-20	3.59763e-20	-3.76106e-20	2.26662e-19	2.24471e-19	1.73447e-19	-4.86701e-19	-4.26808e-18	-2.0928e-18	7.14905e-19	2.14694e-18	7.43821e-19	-1.55256e-18	-4.39893e-19	-5.98279e-19	4.09988e-19	6.84905e-18	-2.58158e-19	-2.38414e-18	6.29575e-18	6.32382e-18	-4.20333e-18	8.55442e-19	1.79558e-18	2.43905e-18	7.23569e-18	-4.91819e-18	-1.27543e-16	-1.10779e-16	8.40437e-17	-1.01498e-16	-3.86249e-18
3.39004e-29	1.05281e-28	6.48008e-29	-3.93949e-28	4.06901e-28	-2.39765e-28	-1.35092e-28	-1.90028e-26	-1.95053e-26	-1.10468e-25	4.20608e-26	-2.46783e-24	-9.56126e-24	4.33433e-25	1.24059e-24	-8.90451e-23	-1.97361e-23	-8.25377e-20	5.73592e-19	3.64418e-19	-3.80973e-19	2.29595e-18	2.27376e-18	1.75691e-18	-4.92998e-18	-4.3233e-17	-2.11988e-17	7.24155e-18	2.17472e-17	7.53446e-18	-1.57265e-17	-4.45584e-18	-6.0602e-18	4.15292e-18	6.93767e-17	-2.61499e-18	-2.41499e-17	6.37721e-17	6.40564e-17	-4.25772e-17	8.66511e-18	1.81881e-17	2.47061e-17	7.32931e-17	-4.98183e-17	-1.29194e-15	-1.12213e-15	8.51311e-16	-1.02811e-15	-3.91247e-17
-1.27121e-08	1.97751e-08	2.62058e-08	6.89915e-08	-9.67961e-09	5.54632e-08	-6.07884e-08	2.64257e-07	2.54745e-07	-2.97139e-06	2.36043e-06	1.87495e-05	4.02597e-05	-7.08932e-06	-1.95604e-06	3.02364e-05	2.51184e-05	-9.23722e-05	-0.000892618	0.000248063	-0.00111376	-0.000697411	0.000586499	-0.00151769	0.00556805	-0.00332615	-0.0104174	0.00491987	-0.000110332	0.00353538	0.0106463	-0.000145058	-0.00543658	-0.0149575	-0.0162699	0.0139163	-0.0326309	0.00189691	0.0149738	0.0268865	0.00897882	-0.0319723	0.00433324	-0.0318047	0.393479	0.05756	-0.0723703	-0.524383	-0.704334	0.149372
-4.75666e-08	-2.54394e-07	7.48711e-08	-5.8082e-07	-1.13356e-07	-5.03682e-07	3.47209e-07	-8.80663e-07	-6.59282e-06	3.78044e-06	-1.03276e-06	-1.58413e-05	-3.1596e-05	2.01707e-05	-0.00012375	0.000160608	-0.00115208	0.00105961	0.00123409	0.0129726	-0.00243533	0.0194413	0.0021772	0.00960678	-0.190044	0.0275617	0.0422427	-0.0119201	-0.00158169	-0.00294451	0.00332896	0.0128646	0.0475838	-0.153902	0.00939992	-0.0311483	0.0317307	-0.0249898	-0.00922576	0.0012337	0.00559379	0.00131104	-0.0023867	-0.0578968	0.0215911	0.0353271	-0.67854	-0.455456	0.425209	0.210609
4.04509e-30	1.25401e-29	7.73753e-30	-4.68147e-29	4.84588e-29	-2.833e-29	-1.59847e-29	-2.25741e-27	-2.31957e-27	-1.31258e-26	4.99808e-27	-2.93166e-25	-1.13585e-24	5.15206e-26	1.47374e-25	-1.0578e-23	-2.34471e-24	-9.80512e-21	6.81402e-20	4.32913e-20	-4.52579e-20	2.72749e-19	2.70112e-19	2.08713e-19	-5.8566e-19	-5.13589e-18	-2.51833e-18	8.60265e-19	2.58347e-18	8.9506e-19	-1.86824e-18	-5.29335e-19	-7.19925e-19	4.93349e-19	8.24165e-18	-3.10649e-19	-2.86891e-18	7.57585e-18	7.60962e-18	-5.05798e-18	1.02938e-18	2.16067e-18	2.93498e-18	8.7069e-18	-5.91819e-18	-1.53476e-16	-1.33304e-16	1.01132e-16	-1.22135e-16	-4.64784e-18
-1.23726e-29	-3.84357e-29	-2.38682e-29	1.43844e-28	-1.48925e-28	8.69818e-29	4.90146e-29	6.92849e-27	7.1256e-27	4.02835e-26	-1.53517e-26	8.997e-25	3.48607e-24	-1.58113e-25	-4.52317e-25	3.24654e-23	7.19612e-24	3.00931e-20	-2.09131e-19	-1.32866e-19	1.38902e-19	-8.371e-19	-8.29008e-19	-6.40566e-19	1.79746e-18	1.57627e-17	7.72906e-18	-2.64026e-18	-7.92898e-18	-2.74705e-18	5.73386e-18	1.62459e-18	2.20954e-18	-1.51415e-18	-2.52946e-17	9.5342e-19	8.80503e-18	-2.32512e-17	-2.33549e-17	1.55236e-17	-3.15928e-18	-6.63136e-18	-9.00781e-18	-2.67226e-17	1.81637e-17	4.71038e-16	4.09126e-16	-3.10387e-16	3.74848e-16	1.42648e-17
4.04509e-30	1.25401e-29	7.73753e-30	-4.68147e-29	4.84588e-29	-2.833e-29	-1.59847e-29	-2.25741e-27	-2.31957e-27	-1.31258e-26	4.99808e-27	-2.93166e-25	-1.13585e-24	5.15206e-26	1.47374e-25	-1.0578e-23	-2.34471e-24	-9.80512e-21	6.81402e-20	4.32913e-20	-4.52579e-20	2.72749e-19	2.70112e-19	2.08713e-19	-5.8566e-19	-5.13589e-18	-2.51833e-18	8.60265e-19	2.58347e-18	8.9506e-19	-1.86824e-18	-5.29335e-19	-7.19925e-19	4.93349e-19	8.24165e-18	-3.10649e-19	-2.86891e-18	7.57585e-18	7.60962e-18	-5.05798e-18	1.02938e-18	2.16067e-18	2.93498e-18	8.7069e-18	-5.91819e-18	-1.53476e-16	-1.33304e-16	1.01132e-16	-1.22135e-16	-4.64784e-18
-1.09569e-29	-3.39883e-29	-2.09537e-29	1.26954e-28	-1.31308e-28	7.68532e-29	4.33023e-29	6.11702e-27	6.2899e-27	3.55649e-26	-1.35452e-26	7.94341e-25	3.0778e-24	-1.39593e-25	-3.99341e-25	2.8663e-23	6.35329e-24	2.65687e-20	-1.84638e-19	-1.17305e-19	1.22634e-19	-7.39061e-19	-7.31917e-19	-5.65545e-19	1.58695e-18	1.39166e-17	6.82386e-18	-2.33104e-18	-7.00036e-18	-2.42532e-18	5.06232e-18	1.43433e-18	1.95077e-18	-1.33682e-18	-2.23322e-17	8.41758e-19	7.77381e-18	-2.05281e-17	-2.06196e-17	1.37055e-17	-2.78928e-18	-5.85471e-18	-7.95284e-18	-2.35929e-17	1.60364e-17	4.15871e-16	3.6121e-16	-2.74035e-16	3.30947e-16	1.25941e-17
3.34905e-30	1.03987e-29	6.42527e-30	-3.89074e-29	4.0205e-29	-2.361e-29	-1.3311e-29	-1.87604e-27	-1.92517e-27	-1.09066e-26	4.15384e-27	-2.43628e-25	-9.4392e-25	4.27922e-26	1.22477e-25	-8.79067e-24	-1.94843e-24	-8.14834e-21	5.66265e-20	3.59763e-20	-3.76106e-20	2.26662e-19	2.24471e-19	1.73447e-19	-4.86701e-19	-4.26808e-18	-2.0928e-18	7.14905e-19	2.14694e-18	7.43821e-19	-1.55256e-18	-4.39893e-19	-5.98279e-19	4.09988e-19	6.84905e-18	-2.58158e-19	-2.38414e-18	6.29575e-18	6.32382e-18	-4.20333e-18	8.55442e-19	1.79558e-18	2.43905e-18	7.23569e-18	-4.91819e-18	-1.27543e-16	-1.10779e-16	8.40437e-17	-1.01498e-16	-3.86249e-18
-1.62044e-31	7.03317e-32	-5.9382e-31	1.46263e-30	-1.02229e-30	7.51892e-32	4.82408e-31	-1.1319e-30	1.80004e-29	1.79795e-29	-6.50865e-29	3.49467e-28	1.78353e-28	6.7912e-29	-2.54649e-28	-1.40947e-27	-1.61559e-27	7.77301e-27	8.99048e-27	4.08162e-26	-5.05569e-26	3.59869e-27	-3.44338e-26	-2.64898e-26	4.12478e-26	-2.15594e-26	-7.08188e-26	2.96517e-26	-4.63351e-26	-4.5064e-26	1.04536e-25	-1.55908e-25	1.98587e-25	8.82784e-27	1.19082e-25	6.41227e-26	-7.48694e-26	-1.62107e-25	1.9422e-25	1.21733e-25	3.14134e-25	-1.44976e-25	-1.23021e-25	6.26839e-26	1.42827e-24	1.06484e-24	-8.06859e-26	-1.2139e-24	-3.16255e-24	1.44681e-24
-0.00385088	0.31779	0.0563262	0.0180231	-0.0420607	0.079593	-0.0259765	-0.0055323	0.00232927	0.00101822	0.0432589	0.000140679	-0.00875499	0.00678199	-0.00290613	-0.0397941	-0.0025834	-0.0184747	0.0286315	-0.012364	0.112783	-0.0790517	-0.00338565	0.174421	-0.0181675	0.00461462	0.0173917	0.0648305	-0.0842387	0.417095	0.107503	0.112689	-0.331609	-0.0517766	0.0562399	-0.018411	-0.0193793	-0.0158599	-0.0529644	-0.0169698	0.039478	-0.011267	-0.00148229	-0.021943	-0.0103279	0.00292902	-0.00271749	0.00212222	-0.0003321	0.00101256
-2.58668e-30	-8.02085e-30	-4.95422e-30	3.00333e-29	-3.10492e-29	1.82258e-29	1.02702e-29	1.44862e-27	1.48841e-27	8.42222e-27	-3.20481e-27	1.88125e-25	7.28878e-25	-3.30559e-26	-9.45667e-26	6.78797e-24	1.50459e-24	6.292e-21	-4.37259e-20	-2.77802e-20	2.90422e-20	-1.75024e-19	-1.73332e-19	-1.33932e-19	3.75821e-19	3.29573e-18	1.61602e-18	-5.52036e-19	-1.65782e-18	-5.74365e-19	1.19886e-18	3.39677e-19	4.6198e-19	-3.16585e-19	-5.28871e-18	1.99345e-19	1.84099e-18	-4.86146e-18	-4.88313e-18	3.24573e-18	-6.60556e-19	-1.38651e-18	-1.88339e-18	-5.58726e-18	3.79773e-18	9.84865e-17	8.55416e-17	-6.4897e-17	7.83748e-17	2.98254e-18
2.26826e-29	7.03871e-29	4.37871e-29	-2.6373e-28	2.72798e-28	-1.59943e-28	-9.05025e-29	-1.27198e-26	-1.30537e-26	-7.3943e-26	2.81606e-26	-1.65178e-24	-6.39983e-24	2.90227e-25	8.30375e-25	-5.96008e-23	-1.32107e-23	-5.52461e-20	3.8393e-19	2.43921e-19	-2.55002e-19	1.53678e-18	1.52192e-18	1.17597e-18	-3.29985e-18	-2.89377e-17	-1.41893e-17	4.84708e-18	1.45563e-17	5.04314e-18	-1.05264e-17	-2.98249e-18	-4.05635e-18	2.77973e-18	4.64368e-17	-1.75032e-18	-1.61646e-17	4.26854e-17	4.28757e-17	-2.84987e-17	5.79993e-18	1.21741e-17	1.65369e-17	4.90582e-17	-3.33455e-17	-8.64748e-16	-7.51087e-16	5.69819e-16	-6.8816e-16	-2.61878e-17
-3.90089e-28	-1.2115e-27	-7.43865e-28	4.5251e-27	-4.67245e-27	2.74575e-27	1.54814e-27	2.18154e-25	2.24041e-25	1.2683e-24	-4.82795e-25	2.83324e-23	1.09767e-22	-4.97661e-24	-1.42416e-23	1.02226e-21	2.26582e-22	9.47557e-19	-6.58501e-18	-4.18363e-18	4.37368e-18	-2.63582e-17	-2.61034e-17	-2.01698e-17	5.65976e-17	4.96327e-16	2.43369e-16	-8.31351e-17	-2.49664e-16	-8.64977e-17	1.80545e-16	5.11544e-17	6.95729e-17	-4.76768e-17	-7.96465e-16	3.00208e-17	2.77248e-16	-7.32122e-16	-7.35386e-16	4.88798e-16	-9.94779e-17	-2.08805e-16	-2.83633e-16	-8.41427e-16	5.71928e-16	1.48318e-14	1.28823e-14	-9.7733e-15	1.1803e-14	4.49163e-16
1.5028e-29	4.66688e-29	2.87755e-29	-1.74552e-28	1.80349e-28	-1.05611e-28	-5.96681e-29	-8.40591e-27	-8.63488e-27	-4.88689e-26	1.86185e-26	-1.0916e-24	-4.22934e-24	1.91786e-25	5.48744e-25	-3.93873e-23	-8.7303e-24	-3.65094e-20	2.5372e-19	1.61195e-19	-1.68518e-19	1.01558e-18	1.00576e-18	7.77143e-19	-2.18071e-18	-1.91235e-17	-9.377e-18	3.2032e-18	9.61955e-18	3.33276e-18	-6.95639e-18	-1.97098e-18	-2.68064e-18	1.83699e-18	3.06878e-17	-1.1567e-18	-1.06824e-17	2.82087e-17	2.83344e-17	-1.88334e-17	3.83289e-18	8.04525e-18	1.09284e-17	3.24202e-17	-2.20364e-17	-5.71469e-16	-4.96357e-16	3.76565e-16	-4.54771e-16	-1.73062e-17
1.26949e-08	2.26974e-08	-1.48387e-09	6.47387e-08	-4.30902e-08	-7.92884e-08	2.45902e-08	-7.78952e-08	1.08197e-06	3.55559e-06	1.79674e-07	-2.74789e-05	1.16011e-05	-2.45459e-05	6.83866e-06	-8.73516e-05	7.49231e-05	-0.000534673	0.000311858	0.000729746	0.00110661	-0.00298874	0.00253842	0.000715589	-0.00129322	-0.0046426	-0.00557739	-0.0039605	0.00680579	-0.0434419	0.0605235	-0.013089	-0.0388398	0.0579471	-0.191258	0.0592562	0.154656	-0.0865463	-0.142417	-0.232998	0.114172	-0.0207792	-0.0325951	-0.0411328	0.0104271	-0.294361	-0.187384	0.142225	-0.126945	-0.0126501
0.00609088	-0.0732109	0.400569	-0.00611506	-0.0271301	-0.00161503	0.00444862	0.00409277	-0.000849729	0.000711296	-0.000837826	-0.000186226	0.000630771	0.000150149	-0.000266361	0.000617593	0.000540448	0.000366246	0.00621558	-0.0193003	0.00266405	0.00963383	-0.00448541	-0.0136541	-0.0222354	-0.0107637	-0.122382	0.249596	-0.476345	-0.142642	0.0450294	-0.0266398	-0.00535889	0.00804793	0.0445757	-0.0323387	0.00341582	-0.0358855	-0.00934074	-0.000430338	-0.00261668	-0.0120025	-0.00690722	-0.00191683	-0.0014581	0.00147141	0.000379362	-0.002588	0.00308049	0.000439789
-4.75829e-06	-3.40986e-05	5.49596e-06	-1.43822e-05	8.44936e-06	-6.12512e-05	1.74249e-05	2.9905e-05	-0.000199111	0.000156314	5.94494e-05	-0.00718318	-0.0204203	0.0145127	-0.0267631	-0.353124	-0.0231072	-0.00358118	0.00837487	0.0244738	0.0344075	-0.0032867	0.0311645	-0.100229	-0.0296245	0.0451576	-0.134933	-0.00905874	0.0349864	0.00713666	0.00694437	0.0112709	0.00639738	-0.00433912	-0.0320599	-0.0352847	0.0062062	-0.064324	-0.0997208	0.100305	-0.0265924	-0.0078287	-0.0333717	0.0171413	0.00431478	0.0558259	-0.0748647	-0.038531	-0.0351771	-0.267105
-2.59364e-29	-8.06327e-29	-4.98728e-29	3.0173e-28	-3.11819e-28	1.82772e-28	1.03176e-28	1.4536e-26	1.49231e-26	8.45043e-26	-3.21922e-26	1.88778e-24	7.3141e-24	-3.31654e-25	-9.48965e-25	6.81152e-23	1.5098e-23	6.31384e-20	-4.38777e-19	-2.78767e-19	2.9143e-19	-1.75632e-18	-1.73934e-18	-1.34397e-18	3.77126e-18	3.30717e-17	1.62163e-17	-5.53952e-18	-1.66358e-17	-5.76358e-18	1.20302e-17	3.40856e-18	4.63583e-18	-3.17684e-18	-5.30706e-17	2.00037e-18	1.84738e-17	-4.87833e-17	-4.90008e-17	3.257e-17	-6.62849e-18	-1.39132e-17	-1.88993e-17	-5.60666e-17	3.81092e-17	9.88283e-16	8.58386e-16	-6.51222e-16	7.86468e-16	2.99289e-17
2.85949e-29	8.86618e-29	5.48124e-29	-3.31791e-28	3.43024e-28	-2.00835e-28	-1.13406e-28	-1.59802e-26	-1.64101e-26	-9.28997e-26	3.53927e-26	-2.07507e-24	-8.03998e-24	3.64644e-25	1.04319e-24	-7.48747e-23	-1.65963e-23	-6.9404e-20	4.8232e-19	3.06431e-19	-3.20351e-19	1.93061e-18	1.91195e-18	1.47734e-18	-4.1455e-18	-3.63536e-17	-1.78256e-17	6.08925e-18	1.82867e-17	6.33554e-18	-1.3224e-17	-3.74681e-18	-5.09588e-18	3.49209e-18	5.83372e-17	-2.19888e-18	-2.03071e-17	5.36244e-17	5.38635e-17	-3.58021e-17	7.28628e-18	1.52939e-17	2.07748e-17	6.16304e-17	-4.1891e-17	-1.08636e-15	-9.43569e-16	7.15847e-16	-8.64514e-16	-3.2899e-17
-2.12348e-30	-6.58161e-30	-4.04254e-30	2.45143e-29	-2.53593e-29	1.48489e-29	8.37331e-30	1.18251e-27	1.21406e-27	6.87573e-27	-2.61727e-27	1.53557e-25	5.94968e-25	-2.69769e-26	-7.71952e-26	5.5409e-24	1.22816e-24	5.13602e-21	-3.56925e-20	-2.26764e-20	2.37065e-20	-1.42868e-19	-1.41487e-19	-1.09326e-19	3.06774e-19	2.69023e-18	1.31912e-18	-4.50615e-19	-1.35324e-18	-4.68841e-19	9.78601e-19	2.77271e-19	3.77104e-19	-2.58421e-19	-4.31705e-18	1.62721e-19	1.50276e-18	-3.9683e-18	-3.98599e-18	2.64942e-18	-5.39197e-19	-1.13178e-18	-1.53737e-18	-4.56076e-18	3.10001e-18	8.03923e-17	6.98257e-17	-5.29739e-17	6.39756e-17	2.43458e-18
-5.3843e-33	2.1749e-33	-1.95337e-32	4.79384e-32	-3.41318e-32	2.67349e-33	1.59328e-32	-3.75334e-32	5.96604e-31	5.90321e-31	-2.14844e-30	1.15808e-29	5.96218e-30	2.18445e-30	-8.33705e-30	-4.62852e-29	-5.31736e-29	2.60732e-28	2.98408e-28	1.34945e-27	-1.66612e-27	1.17225e-28	-1.13454e-27	-8.79642e-28	1.33767e-27	-7.11713e-28	-2.32776e-27	9.66885e-28	-1.56614e-27	-1.44959e-27	3.52314e-27	-5.10741e-27	6.56763e-27	4.07909e-28	3.95206e-27	2.07461e-27	-2.37148e-27	-5.39455e-27	6.43228e-27	4.06898e-27	1.02204e-26	-4.84564e-27	-4.14437e-27	2.27473e-27	4.69962e-26	3.53803e-26	-3.04648e-27	-4.10312e-26	-1.0521e-25	4.78944e-26
2.64643e-10	1.02136e-09	2.37195e-10	3.91523e-10	1.68151e-09	-5.52483e-09	2.23719e-09	-9.23546e-09	9.73049e-09	4.32543e-08	4.01986e-08	1.24654e-06	5.04191e-07	1.91776e-06	-3.29687e-07	1.58235e-06	1.26234e-07	-1.99696e-05	-3.75045e-06	3.33508e-05	-5.21616e-05	-2.09845e-05	4.62815e-05	3.6754e-05	-4.9422e-05	9.62466e-05	-0.000421595	2.33997e-05	5.23505e-05	-0.000106039	-0.000641572	0.000432223	-0.000133559	0.00020743	0.000969112	-0.000560882	0.00071455	-0.000620902	0.000454784	-0.000518969	0.000920627	-0.000879992	-0.000202415	0.000970659	-0.00476719	-0.000989567	0.00307242	-0.00265601	0.00987635	-0.00182517
-0.00368882	0.000206773	-0.00296971	0.0122693	-0.0142525	0.00618571	-0.00199251	0.2285	0.00126727	-0.000198403	-0.000332382	-1.14553e-05	0.000143436	-0.000296011	4.62198e-07	3.79793e-06	-5.41771e-05	-0.00822042	0.0379885	-0.022476	-0.00884588	0.0160856	0.0237315	0.011375	0.042281	-0.0850162	-0.0809045	0.0035946	-0.00105688	0.086219	-0.205528	0.0382529	0.0864134	-0.0200728	0.155447	-0.093488	0.0070414	-0.108504	-0.045326	-0.208847	-0.0680609	0.304495	-0.0942428	0.0336014	0.0710493	-0.00420283	-0.0032344	0.00158797	0.00308387	-0.0138795
-3.39892e-30	-1.05523e-29	-6.54197e-30	3.94692e-29	-4.08391e-29	2.38253e-29	1.34428e-29	1.90026e-27	1.9558e-27	1.10484e-26	-4.21059e-27	2.46779e-25	9.56147e-25	-4.3378e-26	-1.2406e-25	8.90437e-24	1.97375e-24	8.25377e-21	-5.73592e-20	-3.64418e-20	3.80973e-20	-2.29595e-19	-2.27376e-19	-1.75691e-19	4.92998e-19	4.3233e-18	2.11988e-18	-7.24155e-19	-2.17472e-18	-7.53446e-19	1.57265e-18	4.45584e-19	6.0602e-19	-4.15292e-19	-6.93767e-18	2.61499e-19	2.41499e-18	-6.37721e-18	-6.40564e-18	4.25772e-18	-8.66511e-19	-1.81881e-18	-2.47061e-18	-7.32931e-18	4.98183e-18	1.29194e-16	1.12213e-16	-8.51311e-17	1.02811e-16	3.91247e-18
4.05168e-30	1.25547e-29	7.72148e-30	-4.68275e-29	4.84519e-29	-2.83291e-29	-1.5984e-29	-2.25741e-27	-2.3198e-27	-1.31262e-26	4.99806e-27	-2.93168e-25	-1.13585e-24	5.15216e-26	1.47371e-25	-1.0578e-23	-2.3447e-24	-9.80512e-21	6.81402e-20	4.32913e-20	-4.52579e-20	2.72749e-19	2.70112e-19	2.08713e-19	-5.8566e-19	-5.13589e-18	-2.51833e-18	8.60265e-19	2.58347e-18	8.9506e-19	-1.86824e-18	-5.29335e-19	-7.19926e-19	4.93349e-19	8.24165e-18	-3.10649e-19	-2.86891e-18	7.57585e-18	7.60962e-18	-5.05798e-18	1.02938e-18	2.16067e-18	2.93498e-18	8.7069e-18	-5.91819e-18	-1.53476e-16	-1.33304e-16	1.01132e-16	-1.22135e-16	-4.64784e-18
3.34905e-30	1.03987e-29	6.42527e-30	-3.89074e-29	4.0205e-29	-2.361e-29	-1.3311e-29	-1.87604e-27	-1.92517e-27	-1.09066e-26	4.15384e-27	-2.43628e-25	-9.4392e-25	4.27922e-26	1.22477e-25	-8.79067e-24	-1.94843e-24	-8.14834e-21	5.66265e-20	3.59763e-20	-3.76106e-20	2.26662e-19	2.24471e-19	1.73447e-19	-4.86701e-19	-4.26808e-18	-2.0928e-18	7.14905e-19	2.14694e-18	7.43821e-19	-1.55256e-18	-4.39893e-19	-5.98279e-19	4.09988e-19	6.84905e-18	-2.58158e-19	-2.38414e-18	6.29575e-18	6.32382e-18	-4.20333e-18	8.55442e-19	1.79558e-18	2.43905e-18	7.23569e-18	-4.91819e-18	-1.27543e-16	-1.10779e-16	8.40437e-17	-1.01498e-16	-3.86249e-18
-1.08939e-33	-2.80248e-33	-4.77258e-34	-2.02149e-33	2.49042e-33	-7.41258e-33	3.19817e-33	1.57574e-33	-2.63388e-33	5.2654e-32	1.04139e-31	-1.10733e-30	1.90489e-31	-1.15159e-30	-6.73037e-32	-5.34128e-32	1.15392e-30	-4.06599e-30	-4.79942e-29	8.42231e-29	-6.3002e-30	7.74131e-29	6.78204e-29	-1.67995e-28	8.09716e-29	-4.96359e-29	-1.50055e-28	2.76426e-28	-1.84424e-29	4.72933e-28	6.75024e-28	3.00657e-28	1.60501e-28	2.43655e-28	-2.57421e-28	-1.71367e-27	-5.86132e-28	-5.05654e-28	6.41307e-28	-2.38824e-28	-8.58559e-28	-1.14801e-27	7.68663e-28	1.84618e-28	6.00834e-28	3.43348e-27	-1.00559e-26	-3.15393e-27	2.13236e-27	6.26997e-28
-2.32567e-33	-7.22187e-33	-4.47293e-33	2.70487e-32	-2.79653e-32	1.64343e-32	9.26144e-33	1.30544e-30	1.34083e-30	7.5898e-30	-2.88819e-30	1.69529e-28	6.56842e-28	-2.97809e-29	-8.5222e-29	6.11713e-27	1.35589e-27	5.67017e-24	-3.94046e-23	-2.50348e-23	2.61721e-23	-1.57727e-22	-1.56202e-22	-1.20696e-22	3.3868e-22	2.97002e-21	1.45632e-21	-4.9748e-22	-1.49399e-21	-5.17602e-22	1.08038e-21	3.06107e-22	4.16324e-22	-2.85297e-22	-4.76604e-21	1.79644e-22	1.65905e-21	-4.38101e-21	-4.40055e-21	2.92497e-21	-5.95275e-22	-1.24949e-21	-1.69726e-21	-5.03509e-21	3.42241e-21	8.87533e-20	7.70878e-20	-5.84834e-20	7.06292e-20	2.68779e-21
-1.14156e-06	1.26225e-05	2.77658e-05	5.55177e-05	-1.4665e-05	2.17917e-05	-1.10925e-05	6.55721e-05	0.000762901	7.68457e-05	-7.89892e-06	0.00490364	0.0257608	0.0118996	0.0157282	-0.0345124	0.497675	-0.0032561	0.00387279	-0.00112955	-0.00145024	3.2235e-05	0.000143074	-0.000540623	-0.00250729	0.000348287	0.000489981	-3.90798e-05	0.000503178	0.00013443	-1.97076e-05	-0.000471687	-0.000155978	-0.000713188	-9.1312e-05	0.000309119	7.13805e-05	0.000894565	0.000378518	-0.000264274	-0.000225347	0.000207661	0.000195108	-0.000138504	-7.47438e-05	0.000176401	0.00308031	0.00024593	0.00149083	4.60147e-05
0.316003	0.00656551	-0.00334119	0.00102139	0.00498515	-0.00542452	0.000869991	0.00546208	-7.23689e-05	2.55082e-05	-0.000375968	-0.00108762	0.00182321	0.00103668	0.000729713	0.00451745	0.000783467	-0.169749	0.143862	0.664753	0.212952	0.52492	-0.241501	0.136158	0.0968184	-0.000134972	-0.0228619	0.000445012	-0.0067822	-0.02216	-0.00579457	-0.00209767	-0.0148586	-0.0082539	0.0019333	-0.00276936	0.000397451	-0.00104995	-0.000530131	-0.00335649	0.00195582	0.00210115	0.00164375	-0.00410315	0.000698522	-5.81407e-05	0.00111376	8.83165e-06	0.000192001	0.000324544
1.35483e-05	3.69243e-05	5.35307e-06	-2.30634e-05	0.000118465	4.37946e-05	-6.70948e-05	-2.57037e-06	0.00252269	-0.00571019	-0.00209582	0.0164512	0.0243254	0.0503083	-0.494855	0.0367155	0.0154291	-0.000861248	0.00295349	-0.00259307	-0.00216861	0.00611515	0.00189542	0.000471398	-0.00344569	-0.0168032	-0.00405941	0.0095707	-0.0575829	0.0546736	-0.0337622	0.0176858	0.000789697	-0.0812578	-0.282003	0.0854439	-0.0053362	0.0450181	0.0831067	0.0675955	-0.0724462	0.182721	0.0715998	0.0537131	0.02754	-0.0159166	-0.0349526	0.0196635	0.0545782	-0.0181805
-5.08301e-29	-1.5778e-28	-9.73583e-29	5.89912e-28	-6.09528e-28	3.58423e-28	2.02191e-28	2.84638e-26	2.92108e-26	1.6548e-25	-6.29959e-26	3.69652e-24	1.43211e-23	-6.49362e-25	-1.85807e-24	1.33371e-22	2.95614e-23	1.23626e-19	-8.59132e-19	-5.45829e-19	5.70625e-19	-3.4389e-18	-3.40566e-18	-2.63151e-18	7.38418e-18	6.47548e-17	3.17518e-17	-1.08465e-17	-3.25731e-17	-1.12852e-17	2.35553e-17	6.67401e-18	9.07703e-18	-6.22029e-18	-1.03913e-16	3.91675e-18	3.6172e-17	-9.55185e-17	-9.59444e-17	6.37725e-17	-1.29787e-17	-2.72423e-17	-3.70051e-17	-1.09779e-16	7.46183e-17	1.93507e-15	1.68073e-15	-1.2751e-15	1.53992e-15	5.86013e-17
-2.05694e-31	-6.38331e-31	-3.93081e-31	2.38365e-30	-2.46316e-30	1.44287e-30	8.158e-31	1.14866e-28	1.17871e-28	6.67786e-28	-2.5429e-28	1.49175e-26	5.77955e-26	-2.62083e-27	-7.49828e-27	5.38247e-25	1.19305e-25	4.98916e-22	-3.4672e-21	-2.2028e-21	2.30287e-21	-1.38783e-20	-1.37442e-20	-1.062e-20	2.98003e-20	2.61331e-19	1.28141e-19	-4.37731e-20	-1.31455e-19	-4.55436e-20	9.50621e-20	2.69343e-20	3.66322e-20	-2.51032e-20	-4.19362e-19	1.58068e-20	1.45979e-19	-3.85484e-19	-3.87202e-19	2.57367e-19	-5.2378e-20	-1.09942e-19	-1.49341e-19	-4.43036e-19	3.01137e-19	7.80937e-18	6.78293e-18	-5.14593e-18	6.21464e-18	2.36497e-19
8.2304e-30	2.55767e-29	1.57462e-29	-9.53785e-29	9.86115e-29	-5.77806e-29	-3.25968e-29	-4.60148e-27	-4.72807e-27	-2.67562e-26	1.01852e-26	-5.97585e-25	-2.31531e-24	1.04987e-25	3.0041e-25	-2.15622e-23	-4.77935e-24	-1.99868e-20	1.38897e-19	8.82451e-20	-9.22538e-20	5.55972e-19	5.50598e-19	4.25441e-19	-1.19381e-18	-1.0469e-17	-5.13337e-18	1.75357e-18	5.26615e-18	1.82449e-18	-3.80822e-18	-1.079e-18	-1.4675e-18	1.00564e-18	1.67998e-17	-6.33227e-19	-5.84799e-18	1.54426e-17	1.55115e-17	-1.03102e-17	2.09828e-18	4.40431e-18	5.98267e-18	1.77482e-17	-1.20637e-17	-3.12846e-16	-2.71727e-16	2.06148e-16	-2.48961e-16	-9.47417e-18
-2.58668e-30	-8.02085e-30	-4.95422e-30	3.00333e-29	-3.10492e-29	1.82258e-29	1.02702e-29	1.44862e-27	1.48841e-27	8.42222e-27	-3.20481e-27	1.88125e-25	7.28878e-25	-3.30559e-26	-9.45667e-26	6.78797e-24	1.50459e-24	6.292e-21	-4.37259e-20	-2.77802e-20	2.90422e-20	-1.75024e-19	-1.73332e-19	-1.33932e-19	3.75821e-19	3.29573e-18	1.61602e-18	-5.52036e-19	-1.65782e-18	-5.74365e-19	1.19886e-18	3.39677e-19	4.6198e-19	-3.16585e-19	-5.28871e-18	1.99345e-19	1.84099e-18	-4.86146e-18	-4.88313e-18	3.24573e-18	-6.60556e-19	-1.38651e-18	-1.88339e-18	-5.58726e-18	3.79773e-18	9.84865e-17	8.55416e-17	-6.4897e-17	7.83748e-17	2.98254e-18
2.56343e-08	-5.84698e-08	1.68517e-07	4.12659e-07	2.11018e-07	3.18424e-07	4.69036e-07	-7.15007e-08	-4.69795e-06	6.62269e-07	-6.98995e-06	-0.000179753	-0.000118016	0.000150241	-3.38966e-05	-0.000705726	0.000332295	0.00128245	0.000531769	0.00974873	-0.00066023	0.00521406	0.0292483	-0.0198614	0.0543048	-0.095366	0.291681	0.0176832	-0.0782592	-0.013986	-0.0198732	-0.0206161	-0.0243498	0.0137235	0.0806206	0.0891515	-0.0263333	0.151127	0.234642	-0.233005	0.0627323	0.012703	0.080693	-0.0431907	-0.00215035	-0.0403527	0.0458459	0.018864	0.0191267	0.215446
-1.23726e-29	-3.84357e-29	-2.38682e-29	1.43844e-28	-1.48925e-28	8.69818e-29	4.90146e-29	6.92849e-27	7.1256e-27	4.02835e-26	-1.53517e-26	8.997e-25	3.48607e-24	-1.58113e-25	-4.52317e-25	3.24654e-23	7.19612e-24	3.00931e-20	-2.09131e-19	-1.32866e-19	1.38902e-19	-8.371e-19	-8.29008e-19	-6.40566e-19	1.79746e-18	1.57627e-17	7.72906e-18	-2.64026e-18	-7.92898e-18	-2.74705e-18	5.73386e-18	1.62459e-18	2.20954e-18	-1.51415e-18	-2.52946e-17	9.5342e-19	8.80503e-18	-2.32512e-17	-2.33549e-17	1.55236e-17	-3.15928e-18	-6.63136e-18	-9.00781e-18	-2.67226e-17	1.81637e-17	4.71038e-16	4.09126e-16	-3.10387e-16	3.74848e-16	1.42648e-17
2.93156e-29	9.10167e-29	5.6626e-29	-3.40349e-28	3.52606e-28	-2.05341e-28	-1.15912e-28	-1.63944e-26	-1.68602e-26	-9.53285e-26	3.63264e-26	-2.12908e-24	-8.24946e-24	3.74218e-25	1.07035e-24	-7.68243e-23	-1.70289e-23	-7.12114e-20	4.9488e-19	3.14411e-19	-3.28693e-19	1.98088e-18	1.96174e-18	1.51581e-18	-4.25346e-18	-3.73003e-17	-1.82898e-17	6.24782e-18	1.87629e-17	6.50053e-18	-1.35684e-17	-3.84439e-18	-5.22858e-18	3.58303e-18	5.98564e-17	-2.25614e-18	-2.08359e-17	5.50209e-17	5.52662e-17	-3.67345e-17	7.47603e-18	1.56922e-17	2.13158e-17	6.32354e-17	-4.29819e-17	-1.11465e-15	-9.68141e-16	7.34489e-16	-8.87028e-16	-3.37557e-17
-5.34365e-33	2.31248e-33	-1.96554e-32	4.83194e-32	-3.38034e-32	2.56116e-33	1.59156e-32	-3.7375e-32	5.96186e-31	5.93193e-31	-2.15303e-30	1.15355e-29	5.90113e-30	2.22838e-30	-8.47329e-30	-4.6599e-29	-5.3437e-29	2.56986e-28	2.96201e-28	1.34822e-27	-1.67088e-27	1.21742e-28	-1.13794e-27	-8.7599e-28	1.36657e-27	-7.13575e-28	-2.34286e-27	9.84936e-28	-1.54209e-27	-1.49017e-27	3.47354e-27	-5.13573e-27	6.55808e-27	3.00212e-28	3.94465e-27	2.11832e-27	-2.50081e-27	-5.35532e-27	6.39114e-27	4.02531e-27	1.03889e-26	-4.80579e-27	-4.0615e-27	2.09041e-27	4.72282e-26	3.51597e-26	-2.62438e-27	-4.00922e-26	-1.04513e-25	4.79408e-26
-5.08673e-30	-1.5786e-29	-9.7392e-30	5.9002e-29	-6.0984e-29	3.56275e-29	2.01457e-29	2.8401e-27	2.91755e-27	1.65115e-26	-6.29047e-27	3.6881e-25	1.42898e-24	-6.48153e-26	-1.854e-25	1.33079e-23	2.94981e-24	1.23355e-20	-8.57248e-20	-5.44632e-20	5.69374e-20	-3.43136e-19	-3.39819e-19	-2.62574e-19	7.36798e-19	6.46128e-18	3.16822e-18	-1.08227e-18	-3.25017e-18	-1.12604e-18	2.35037e-18	6.65937e-19	9.05713e-19	-6.20665e-19	-1.03685e-17	3.90816e-19	3.60927e-18	-9.5309e-18	-9.5734e-18	6.36327e-18	-1.29502e-18	-2.71826e-18	-3.69239e-18	-1.09538e-17	7.44547e-18	1.93083e-16	1.67705e-16	-1.27231e-16	1.53654e-16	5.84728e-18
2.56343e-08	-5.84698e-08	1.68517e-07	4.12659e-07	2.11018e-07	3.18424e-07	4.69036e-07	-7.15007e-08	-4.69795e-06	6.62269e-07	-6.98995e-06	-0.000179753	-0.000118016	0.000150241	-3.38966e-05	-0.000705726	0.000332295	0.00128245	0.000531769	0.00974873	-0.00066023	0.00521406	0.0292483	-0.0198614	0.0543048	-0.095366	0.291681	0.0176832	-0.0782592	-0.013986	-0.0198732	-0.0206161	-0.0243498	0.0137235	0.0806206	0.0891515	-0.0263333	0.151127	0.234642	-0.233005	0.0627323	0.012703	0.080693	-0.0431907	-0.00215035	-0.0403527	0.0458459	0.018864	0.0191267	0.215446
-2.56873e-30	1.11163e-30	-9.44851e-30	2.32275e-29	-1.62496e-29	1.23117e-30	7.65076e-30	-1.79664e-29	2.86591e-28	2.85152e-28	-1.03498e-27	5.5452e-27	2.83671e-27	1.0712e-27	-4.07317e-27	-2.24005e-26	-2.56876e-26	1.23535e-25	1.42386e-25	6.48098e-25	-8.03203e-25	5.85222e-26	-5.47018e-25	-4.21095e-25	6.5692e-25	-3.43021e-25	-1.12623e-24	4.73466e-25	-7.41293e-25	-7.16336e-25	1.66976e-24	-2.46878e-24	3.15252e-24	1.44314e-25	1.89622e-24	1.01829e-24	-1.20216e-24	-2.57434e-24	3.07227e-24	1.935e-24	4.99401e-24	-2.31018e-24	-1.95239e-24	1.00488e-24	2.27029e-23	1.69015e-23	-1.26156e-24	-1.92726e-23	-5.02403e-23	2.30455e-23
4.05168e-30	1.25547e-29	7.72148e-30	-4.68275e-29	4.84519e-29	-2.83291e-29	-1.5984e-29	-2.25741e-27	-2.3198e-27	-1.31262e-26	4.99806e-27	-2.93168e-25	-1.13585e-24	5.15216e-26	1.47371e-25	-1.0578e-23	-2.3447e-24	-9.80512e-21	6.81402e-20	4.32913e-20	-4.52579e-20	2.72749e-19	2.70112e-19	2.08713e-19	-5.8566e-19	-5.13589e-18	-2.51833e-18	8.60265e-19	2.58347e-18	8.9506e-19	-1.86824e-18	-5.29335e-19	-7.19926e-19	4.93349e-19	8.24165e-18	-3.10649e-19	-2.86891e-18	7.57585e-18	7.60962e-18	-5.05798e-18	1.02938e-18	2.16067e-18	2.93498e-18	8.7069e-18	-5.91819e-18	-1.53476e-16	-1.33304e-16	1.01132e-16	-1.22135e-16	-4.64784e-18
5.60798e-20	1.1563e-19	5.25447e-20	4.64567e-19	-7.25644e-19	-2.25665e-19	-3.75851e-19	3.12704e-19	5.85308e-18	3.2495e-18	-4.03639e-18	7.05943e-17	5.23051e-17	-6.48204e-18	-1.09907e-16	2.8064e-16	2.5682e-16	-2.94833e-16	3.52096e-16	6.00515e-15	1.31114e-14	-6.34973e-15	-1.78056e-14	2.40548e-15	5.9812e-15	2.52516e-14	9.25536e-15	-9.69586e-15	1.48032e-14	-5.43728e-14	-1.17109e-13	1.08784e-13	-3.11068e-14	1.54396e-13	2.14353e-13	-2.1255e-13	1.4025e-13	4.81066e-14	7.44836e-15	-9.40895e-14	-7.33283e-14	-6.24468e-15	-1.17841e-13	3.54939e-13	-1.02211e-12	-3.56906e-13	1.53081e-13	-6.25563e-13	-5.2899e-13	5.05457e-13
5.39408e-31	-1.61393e-30	-5.01412e-31	-2.36335e-30	1.22321e-30	-3.17234e-30	-2.67074e-30	2.24933e-31	7.32499e-29	-3.09509e-29	-2.94832e-28	7.20404e-29	6.2542e-29	1.12422e-27	-3.99774e-28	6.76626e-27	-1.36207e-27	1.9856e-26	-1.62891e-26	-1.13658e-26	5.72115e-26	-1.10433e-25	3.73168e-26	-1.09003e-26	5.41143e-26	-1.30983e-26	-1.10936e-25	-3.94085e-25	-4.42901e-25	8.66592e-25	1.81134e-25	5.28972e-26	6.56249e-25	2.92368e-25	-2.45569e-25	-1.42901e-24	3.55982e-24	2.24063e-24	8.75792e-25	1.33583e-25	-5.42665e-25	2.00077e-25	-1.88551e-24	-3.60337e-25	-2.98144e-26	-7.86298e-25	5.21487e-24	-3.24151e-26	-2.72165e-24	1.50409e-23
5.69305e-34	1.7673e-33	1.09159e-33	-6.59527e-33	6.82497e-33	-3.99912e-33	-2.25771e-33	-3.18314e-31	-3.26721e-31	-1.85097e-30	7.04567e-31	-4.13358e-29	-1.60165e-28	7.26278e-30	2.07801e-29	-1.4916e-27	-3.30622e-28	-1.38261e-24	9.60839e-24	6.10446e-24	-6.38177e-24	3.846e-23	3.80883e-23	2.94304e-23	-8.25834e-23	-7.24207e-22	-3.55107e-22	1.21305e-22	3.64292e-22	1.26212e-22	-2.63439e-22	-7.4641e-23	-1.01516e-22	6.95667e-23	1.16215e-21	-4.38043e-23	-4.04542e-22	1.06826e-21	1.07303e-21	-7.13221e-22	1.45151e-22	3.04674e-22	4.13858e-22	1.22775e-21	-8.34519e-22	-2.16415e-20	-1.8797e-20	1.42605e-20	-1.72222e-20	-6.55387e-22
0.000138739	-9.49242e-05	0.000859257	4.22331e-05	0.000660542	-0.000672686	-6.28401e-05	0.000446953	0.0289921	0.000619492	0.37992	0.00360266	0.00123348	0.000811247	-0.00160911	-0.00576069	-0.000423966	-0.00271215	0.00200707	-0.00145714	0.021358	-0.0178303	0.00134343	0.027115	0.0013643	0.00228218	0.00429818	0.0212312	0.0212329	-0.0487079	-0.0363423	-0.0587466	-0.0010243	-0.0283009	-0.0182339	-0.00162683	-0.0835267	0.0163657	-0.0330393	-0.00993703	0.0334759	0.00618004	-0.0261546	0.00846788	-0.00107331	0.0129298	-0.0251799	0.00671149	-0.00167239	0.0205747
-4.99846e-23	-3.33797e-22	-7.52526e-24	3.99964e-22	4.85025e-22	-1.5757e-21	4.07002e-22	-7.45749e-23	-1.45855e-21	1.85129e-20	2.01682e-20	-2.033e-19	2.31476e-19	1.46041e-19	5.22024e-19	-8.96562e-19	1.74219e-19	8.79457e-19	1.56789e-17	1.2559e-17	1.08352e-18	-3.35549e-19	1.5961e-17	-1.74386e-17	-3.51804e-17	4.20769e-17	-4.87214e-18	1.35677e-17	2.86906e-18	9.02197e-17	-6.39256e-17	-2.82299e-17	8.64423e-17	4.81696e-17	-2.46129e-16	-1.06985e-16	5.34159e-17	-2.30319e-16	1.54014e-16	-1.572e-16	3.86487e-17	6.28596e-17	-7.72046e-17	-7.40361e-17	3.49044e-16	6.31267e-16	-7.07216e-16	8.5156e-17	2.72888e-15	8.49665e-16
1.5028e-29	4.66688e-29	2.87755e-29	-1.74552e-28	1.80349e-28	-1.05611e-28	-5.96681e-29	-8.40591e-27	-8.63488e-27	-4.88689e-26	1.86185e-26	-1.0916e-24	-4.22934e-24	1.91786e-25	5.48744e-25	-3.93873e-23	-8.7303e-24	-3.65094e-20	2.5372e-19	1.61195e-19	-1.68518e-19	1.01558e-18	1.00576e-18	7.77143e-19	-2.18071e-18	-1.91235e-17	-9.377e-18	3.2032e-18	9.61955e-18	3.33276e-18	-6.95639e-18	-1.97098e-18	-2.68064e-18	1.83699e-18	3.06878e-17	-1.1567e-18	-1.06824e-17	2.82087e-17	2.83344e-17	-1.88334e-17	3.83289e-18	8.04525e-18	1.09284e-17	3.24202e-17	-2.20364e-17	-5.71469e-16	-4.96357e-16	3.76565e-16	-4.54771e-16	-1.73062e-17
-4.69599e-31	-1.45949e-30	-9.00051e-31	5.45991e-30	-5.64229e-30	3.31639e-30	1.87258e-30	2.63328e-28	2.70299e-28	1.53085e-27	-5.8281e-28	3.41967e-26	1.32492e-25	-6.00665e-27	-1.71906e-26	1.23391e-24	2.73492e-25	1.14374e-21	-7.94839e-21	-5.04982e-21	5.27922e-21	-3.18154e-20	-3.15079e-20	-2.43458e-20	6.83158e-20	5.99089e-19	2.93757e-19	-1.00348e-19	-3.01355e-19	-1.04407e-19	2.17925e-19	6.17456e-20	8.39775e-20	-5.75479e-20	-9.61367e-19	3.62364e-20	3.34651e-19	-8.83703e-19	-8.87643e-19	5.90001e-19	-1.20074e-19	-2.52036e-19	-3.42358e-19	-1.01564e-18	6.90342e-19	1.79026e-17	1.55495e-17	-1.17968e-17	1.42468e-17	5.42159e-19
3.39004e-29	1.05281e-28	6.48008e-29	-3.93949e-28	4.06901e-28	-2.39765e-28	-1.35092e-28	-1.90028e-26	-1.95053e-26	-1.10468e-25	4.20608e-26	-2.46783e-24	-9.56126e-24	4.33433e-25	1.24059e-24	-8.90451e-23	-1.97361e-23	-8.25377e-20	5.73592e-19	3.64418e-19	-3.80973e-19	2.29595e-18	2.27376e-18	1.75691e-18	-4.92998e-18	-4.3233e-17	-2.11988e-17	7.24155e-18	2.17472e-17	7.53446e-18	-1.57265e-17	-4.45584e-18	-6.0602e-18	4.15292e-18	6.93767e-17	-2.61499e-18	-2.41499e-17	6.37721e-17	6.40564e-17	-4.25772e-17	8.66511e-18	1.81881e-17	2.47061e-17	7.32931e-17	-4.98183e-17	-1.29194e-15	-1.12213e-15	8.51311e-16	-1.02811e-15	-3.91247e-17
1.11989e-05	3.57111e-05	8.00439e-05	-0.000146876	-4.28344e-05	4.45108e-05	-7.979e-05	-7.52514e-05	0.00186788	-0.00466919	-0.00398666	0.202313	0.338691	0.415106	0.0640138	-0.00961384	-0.0321408	-0.000454411	0.00379493	-0.0026389	0.000787036	-0.00155884	-0.000766034	-0.000311581	0.00223463	-0.00493776	0.00311849	0.00271382	0.0101684	-0.00909552	0.0143301	0.0138805	-0.00525773	-0.0468887	-0.0630066	-0.146097	-0.0829012	0.0142364	-0.0616984	-0.155604	-0.255415	-0.130633	0.143048	0.0229109	0.00831788	0.000288651	0.00371154	-0.000641546	0.00571595	-0.00232447
2.85949e-29	8.86618e-29	5.48124e-29	-3.31791e-28	3.43024e-28	-2.00835e-28	-1.13406e-28	-1.59802e-26	-1.64101e-26	-9.28997e-26	3.53927e-26	-2.07507e-24	-8.03998e-24	3.64644e-25	1.04319e-24	-7.48747e-23	-1.65963e-23	-6.9404e-20	4.8232e-19	3.06431e-19	-3.20351e-19	1.93061e-18	1.91195e-18	1.47734e-18	-4.1455e-18	-3.63536e-17	-1.78256e-17	6.08925e-18	1.82867e-17	6.33554e-18	-1.3224e-17	-3.74681e-18	-5.09588e-18	3.49209e-18	5.83372e-17	-2.19888e-18	-2.03071e-17	5.36244e-17	5.38635e-17	-3.58021e-17	7.28628e-18	1.52939e-17	2.07748e-17	6.16304e-17	-4.1891e-17	-1.08636e-15	-9.43569e-16	7.15847e-16	-8.64514e-16	-3.2899e-17
-4.97436e-30	-1.54178e-29	-9.54572e-30	5.7592e-29	-5.96301e-29	3.47465e-29	1.96008e-29	2.77422e-27	2.85305e-27	1.61304e-26	-6.14363e-27	3.60253e-25	1.39584e-24	-6.33148e-26	-1.8111e-25	1.29989e-23	2.88139e-24	1.20493e-20	-8.37361e-20	-5.31998e-20	5.56165e-20	-3.35175e-19	-3.31935e-19	-2.56483e-19	7.19705e-19	6.31139e-18	3.09472e-18	-1.05716e-18	-3.17477e-18	-1.09992e-18	2.29584e-18	6.50488e-19	8.84701e-19	-6.06266e-19	-1.0128e-17	3.8175e-19	3.52554e-18	-9.3098e-18	-9.3513e-18	6.21565e-18	-1.26498e-18	-2.6552e-18	-3.60673e-18	-1.06997e-17	7.27274e-18	1.88604e-16	1.63814e-16	-1.24279e-16	1.50089e-16	5.71163e-18
-4.96145e-30	-1.53883e-29	-9.57814e-30	5.75661e-29	-5.96362e-29	3.47659e-29	1.95962e-29	2.77422e-27	2.85286e-27	1.61301e-26	-6.14446e-27	3.60252e-25	1.39584e-24	-6.33143e-26	-1.81108e-25	1.2999e-23	2.88138e-24	1.20493e-20	-8.37361e-20	-5.31998e-20	5.56165e-20	-3.35175e-19	-3.31935e-19	-2.56483e-19	7.19705e-19	6.31139e-18	3.09472e-18	-1.05716e-18	-3.17477e-18	-1.09992e-18	2.29584e-18	6.50488e-19	8.84701e-19	-6.06266e-19	-1.0128e-17	3.8175e-19	3.52554e-18	-9.3098e-18	-9.3513e-18	6.21565e-18	-1.26498e-18	-2.6552e-18	-3.60673e-18	-1.06997e-17	7.27274e-18	1.88604e-16	1.63814e-16	-1.24279e-16	1.50089e-16	5.71163e-18
4.04509e-30	1.25401e-29	7.73753e-30	-4.68147e-29	4.84588e-29	-2.833e-29	-1.59847e-29	-2.25741e-27	-2.31957e-27	-1.31258e-26	4.99808e-27	-2.93166e-25	-1.13585e-24	5.15206e-26	1.47374e-25	-1.0578e-23	-2.34471e-24	-9.80512e-21	6.81402e-20	4.32913e-20	-4.52579e-20	2.72749e-19	2.70112e-19	2.08713e-19	-5.8566e-19	-5.13589e-18	-2.51833e-18	8.60265e-19	2.58347e-18	8.9506e-19	-1.86824e-18	-5.29335e-19	-7.19925e-19	4.93349e-19	8.24165e-18	-3.10649e-19	-2.86891e-18	7.57585e-18	7.60962e-18	-5.05798e-18	1.02938e-18	2.16067e-18	2.93498e-18	8.7069e-18	-5.91819e-18	-1.53476e-16	-1.33304e-16	1.01132e-16	-1.22135e-16	-4.64784e-18
-1.65532e-34	-5.14332e-34	-3.1855e-34	1.92195e-33	-1.98919e-33	1.16349e-33	6.56975e-34	9.2693e-32	9.52281e-32	5.38992e-31	-2.05278e-31	1.2039e-29	4.66438e-29	-2.1156e-30	-6.05201e-30	4.34386e-28	9.62851e-29	4.02649e-25	-2.79819e-24	-1.77776e-24	1.85852e-24	-1.12005e-23	-1.10922e-23	-8.57082e-24	2.40502e-23	2.10906e-22	1.03415e-22	-3.53269e-23	-1.0609e-22	-3.67558e-23	7.67195e-23	2.17372e-23	2.95638e-23	-2.02594e-23	-3.38444e-22	1.27568e-23	1.17812e-22	-3.11103e-22	-3.1249e-22	2.07707e-22	-4.22715e-23	-8.87281e-23	-1.20525e-22	-3.5755e-22	2.43031e-22	6.30252e-21	5.47413e-21	-4.153e-21	5.0155e-21	1.90864e-22
3.26408e-27	1.01424e-26	6.27005e-27	-3.79067e-26	3.91849e-26	-2.29399e-26	-1.29538e-26	-1.8269e-24	-1.87764e-24	-1.06219e-23	4.04547e-24	-2.37247e-22	-9.19238e-22	4.16819e-23	1.19268e-22	-8.56066e-21	-1.89751e-21	-7.93519e-18	5.51452e-17	3.50352e-17	-3.66268e-17	2.20733e-16	2.18599e-16	1.68909e-16	-4.73969e-16	-4.15643e-15	-2.03806e-15	6.96204e-16	2.09077e-15	7.24364e-16	-1.51195e-15	-4.28386e-16	-5.82629e-16	3.99263e-16	6.66988e-15	-2.51405e-16	-2.32178e-15	6.13106e-15	6.15839e-15	-4.09338e-15	8.33065e-16	1.74861e-15	2.37525e-15	7.04641e-15	-4.78954e-15	-1.24207e-13	-1.07881e-13	8.18452e-14	-9.88428e-14	-3.76145e-15
-2.58668e-30	-8.02085e-30	-4.95422e-30	3.00333e-29	-3.10492e-29	1.82258e-29	1.02702e-29	1.44862e-27	1.48841e-27	8.42222e-27	-3.20481e-27	1.88125e-25	7.28878e-25	-3.30559e-26	-9.45667e-26	6.78797e-24	1.50459e-24	6.292e-21	-4.37259e-20	-2.77802e-20	2.90422e-20	-1.75024e-19	-1.73332e-19	-1.33932e-19	3.75821e-19	3.29573e-18	1.61602e-18	-5.52036e-19	-1.65782e-18	-5.74365e-19	1.19886e-18	3.39677e-19	4.6198e-19	-3.16585e-19	-5.28871e-18	1.99345e-19	1.84099e-18	-4.86146e-18	-4.88313e-18	3.24573e-18	-6.60556e-19	-1.38651e-18	-1.88339e-18	-5.58726e-18	3.79773e-18	9.84865e-17	8.55416e-17	-6.4897e-17	7.83748e-17	2.98254e-18
-4.12626e-29	-1.28044e-28	-7.94662e-29	4.7969e-28	-4.96024e-28	2.91855e-28	1.64943e-28	2.31647e-26	2.37537e-26	1.3466e-25	-5.12497e-26	3.00815e-24	1.16551e-23	-5.28391e-25	-1.51221e-24	1.08544e-22	2.4058e-23	1.00612e-19	-6.99196e-19	-4.44218e-19	4.64398e-19	-2.79871e-18	-2.77166e-18	-2.14163e-18	6.00954e-18	5.27001e-17	2.58409e-17	-8.8273e-18	-2.65093e-17	-9.18434e-18	1.91703e-17	5.43158e-18	7.38725e-18	-5.06232e-18	-8.45687e-17	3.18761e-18	2.94382e-17	-7.77368e-17	-7.80834e-17	5.19006e-17	-1.05626e-17	-2.21709e-17	-3.01162e-17	-8.93427e-17	6.07274e-17	1.57484e-15	1.36785e-15	-1.03773e-15	1.25325e-15	4.76921e-17
-4.1366e-29	-1.28259e-28	-7.9175e-29	4.79853e-28	-4.95918e-28	2.91831e-28	1.64921e-28	2.31647e-26	2.3754e-26	1.34664e-25	-5.1249e-26	3.00814e-24	1.16551e-23	-5.28411e-25	-1.51219e-24	1.08544e-22	2.40581e-23	1.00612e-19	-6.99196e-19	-4.44218e-19	4.64398e-19	-2.79871e-18	-2.77166e-18	-2.14163e-18	6.00954e-18	5.27001e-17	2.58409e-17	-8.8273e-18	-2.65093e-17	-9.18434e-18	1.91703e-17	5.43158e-18	7.38725e-18	-5.06232e-18	-8.45687e-17	3.18761e-18	2.94382e-17	-7.77368e-17	-7.80834e-17	5.19006e-17	-1.05626e-17	-2.21709e-17	-3.01162e-17	-8.93427e-17	6.07274e-17	1.57484e-15	1.36785e-15	-1.03773e-15	1.25325e-15	4.76921e-17
4.42475e-29	1.37214e-28	8.46798e-29	-5.12296e-28	5.30185e-28	-3.10431e-28	-1.75202e-28	-2.4717e-26	-2.53774e-26	-1.43725e-25	5.47174e-26	-3.2099e-24	-1.24368e-23	5.64068e-25	1.61361e-24	-1.15822e-22	-2.56725e-23	-1.07359e-19	7.46089e-19	4.7401e-19	-4.95543e-19	2.98641e-18	2.95754e-18	2.28526e-18	-6.41258e-18	-5.62345e-17	-2.7574e-17	9.41931e-18	2.82872e-17	9.80029e-18	-2.04559e-17	-5.79585e-18	-7.88269e-18	5.40183e-18	9.02403e-17	-3.40139e-18	-3.14125e-17	8.29503e-17	8.33201e-17	-5.53814e-17	1.1271e-17	2.36578e-17	3.2136e-17	9.53346e-17	-6.48001e-17	-1.68046e-15	-1.45958e-15	1.10733e-15	-1.3373e-15	-5.08906e-17
3.35565e-30	1.04128e-29	6.4085e-30	-3.89191e-29	4.02e-29	-2.36047e-29	-1.33107e-29	-1.87604e-27	-1.92517e-27	-1.09065e-26	4.1539e-27	-2.43626e-25	-9.4392e-25	4.27944e-26	1.22479e-25	-8.79069e-24	-1.94844e-24	-8.14834e-21	5.66265e-20	3.59763e-20	-3.76106e-20	2.26662e-19	2.24471e-19	1.73447e-19	-4.86701e-19	-4.26808e-18	-2.0928e-18	7.14905e-19	2.14694e-18	7.43821e-19	-1.55256e-18	-4.39893e-19	-5.98279e-19	4.09988e-19	6.84905e-18	-2.58158e-19	-2.38414e-18	6.29575e-18	6.32382e-18	-4.20333e-18	8.55442e-19	1.79558e-18	2.43905e-18	7.23569e-18	-4.91819e-18	-1.27543e-16	-1.10779e-16	8.40437e-17	-1.01498e-16	-3.86249e-18
-4.48097e-34	-4.67241e-34	3.27663e-34	-2.24527e-33	2.07605e-34	-2.65627e-33	1.82418e-33	-1.37541e-33	-1.31075e-32	2.22579e-32	2.09574e-32	-2.13529e-33	2.3204e-31	-3.85639e-31	-5.9082e-31	-5.6805e-31	2.13817e-30	-6.73823e-30	-8.85193e-30	5.2684e-30	7.02521e-30	5.10152e-30	-1.44716e-29	-3.68645e-29	1.2552e-28	7.17159e-29	-6.95688e-29	2.16058e-28	1.02895e-28	1.20543e-28	3.68006e-28	7.99113e-29	3.20345e-28	1.22649e-28	-3.34101e-28	-3.00182e-28	1.49366e-28	-2.15536e-28	1.42107e-28	-5.07051e-28	-4.16327e-28	1.68593e-28	5.23486e-29	-9.73833e-29	-3.90439e-28	1.18145e-27	-2.84696e-27	3.03768e-28	-8.14889e-28	-4.91654e-28
8.6746e-06	7.31387e-05	9.71334e-05	-0.000110724	-7.80274e-05	0.000150965	-0.000187702	-8.02756e-05	-0.00121871	-0.00172249	-0.00390079	0.464647	-0.0660464	-0.171734	-0.00615708	-0.0124202	0.00241605	0.00111572	-0.00210553	0.00417014	0.00158312	-0.00627635	-0.00126054	7.81258e-05	0.00336975	0.0163928	0.00342465	-0.010502	0.0566203	-0.0545643	0.0340931	-0.0188829	-0.00173688	0.0801541	0.276112	-0.0845758	0.00683159	-0.0434324	-0.0818154	-0.0660589	0.0729128	-0.1809	-0.0720488	-0.0537011	-0.026864	-0.015573	-0.00568664	-0.0128053	0.00482927	-0.0019778
1.19838e-28	3.71866e-28	2.30149e-28	-1.38874e-27	1.43754e-27	-8.38811e-28	-4.73112e-28	-6.69129e-26	-6.87906e-26	-3.89085e-25	1.48201e-25	-8.68939e-24	-3.36673e-23	1.5272e-24	4.36823e-24	-3.13537e-22	-6.94995e-23	-2.90629e-19	2.01971e-18	1.28318e-18	-1.34147e-18	8.08442e-18	8.00628e-18	6.18637e-18	-1.73593e-17	-1.52231e-16	-7.46446e-17	2.54987e-17	7.65754e-17	2.65301e-17	-5.53756e-17	-1.56898e-17	-2.1339e-17	1.46231e-17	2.44287e-16	-9.2078e-18	-8.5036e-17	2.24552e-16	2.25553e-16	-1.49921e-16	3.05113e-17	6.40434e-17	8.69944e-17	2.58077e-16	-1.75419e-16	-4.54912e-15	-3.95119e-15	2.99761e-15	-3.62015e-15	-1.37765e-16
-3.90089e-28	-1.2115e-27	-7.43865e-28	4.5251e-27	-4.67245e-27	2.74575e-27	1.54814e-27	2.18154e-25	2.24041e-25	1.2683e-24	-4.82795e-25	2.83324e-23	1.09767e-22	-4.97661e-24	-1.42416e-23	1.02226e-21	2.26582e-22	9.47557e-19	-6.58501e-18	-4.18363e-18	4.37368e-18	-2.63582e-17	-2.61034e-17	-2.01698e-17	5.65976e-17	4.96327e-16	2.43369e-16	-8.31351e-17	-2.49664e-16	-8.64977e-17	1.80545e-16	5.11544e-17	6.95729e-17	-4.76768e-17	-7.96465e-16	3.00208e-17	2.77248e-16	-7.32122e-16	-7.35386e-16	4.88798e-16	-9.94779e-17	-2.08805e-16	-2.83633e-16	-8.41427e-16	5.71928e-16	1.48318e-14	1.28823e-14	-9.7733e-15	1.1803e-14	4.49163e-16
-1.69751e-32	-5.26235e-32	-3.23491e-32	1.96614e-31	-2.03102e-31	1.19387e-31	6.74007e-32	9.48228e-30	9.7238e-30	5.51228e-29	-2.09847e-29	1.23141e-27	4.77084e-27	-2.16332e-28	-6.18992e-28	4.44309e-26	9.84794e-27	4.11841e-23	-2.86207e-22	-1.81835e-22	1.90095e-22	-1.14562e-21	-1.13454e-21	-8.7665e-22	2.45993e-21	2.15721e-20	1.05777e-20	-3.61334e-21	-1.08513e-20	-3.75949e-21	7.84711e-21	2.22335e-21	3.02388e-21	-2.0722e-21	-3.46171e-20	1.30481e-21	1.20502e-20	-3.18206e-20	-3.19625e-20	2.12449e-20	-4.32366e-21	-9.07539e-21	-1.23277e-20	-3.65713e-20	2.4858e-20	6.44641e-19	5.59911e-19	-4.24782e-19	5.13001e-19	1.95222e-20
-1.65532e-34	-5.14332e-34	-3.1855e-34	1.92195e-33	-1.98919e-33	1.16349e-33	6.56975e-34	9.2693e-32	9.52281e-32	5.38992e-31	-2.05278e-31	1.2039e-29	4.66438e-29	-2.1156e-30	-6.05201e-30	4.34386e-28	9.62851e-29	4.02649e-25	-2.79819e-24	-1.77776e-24	1.85852e-24	-1.12005e-23	-1.10922e-23	-8.57082e-24	2.40502e-23	2.10906e-22	1.03415e-22	-3.53269e-23	-1.0609e-22	-3.67558e-23	7.67195e-23	2.17372e-23	2.95638e-23	-2.02594e-23	-3.38444e-22	1.27568e-23	1.17812e-22	-3.11103e-22	-3.1249e-22	2.07707e-22	-4.22715e-23	-8.87281e-23	-1.20525e-22	-3.5755e-22	2.43031e-22	6.30252e-21	5.47413e-21	-4.153e-21	5.0155e-21	1.90864e-22
-2.50154e-21	-5.31485e-21	-7.02581e-21	5.23759e-21	2.79447e-20	-2.96883e-20	1.80022e-20	2.23879e-20	-2.03508e-19	2.63295e-19	-8.40827e-21	-3.72094e-18	-2.88434e-19	-4.34988e-18	2.96028e-18	-8.51159e-18	-2.76146e-18	9.30688e-17	3.37858e-16	1.22326e-16	2.6092e-16	-4.74211e-16	-3.10116e-16	1.7172e-16	-2.03909e-16	8.51201e-16	1.96062e-16	-9.19503e-16	7.13754e-16	-5.26455e-17	5.87907e-17	-1.93055e-15	8.08639e-16	1.88623e-17	-1.22994e-15	-9.30181e-16	2.24916e-16	3.2257e-15	8.27331e-16	-1.78876e-15	-1.04071e-15	5.69609e-15	-5.95664e-17	3.57419e-15	2.60341e-15	7.08879e-15	-1.4035e-14	-1.78589e-15	-5.1e-15	1.22165e-14
-1.23726e-29	-3.84357e-29	-2.38682e-29	1.43844e-28	-1.48925e-28	8.69818e-29	4.90146e-29	6.92849e-27	7.1256e-27	4.02835e-26	-1.53517e-26	8.997e-25	3.48607e-24	-1.58113e-25	-4.52317e-25	3.24654e-23	7.19612e-24	3.00931e-20	-2.09131e-19	-1.32866e-19	1.38902e-19	-8.371e-19	-8.29008e-19	-6.40566e-19	1.79746e-18	1.57627e-17	7.72906e-18	-2.64026e-18	-7.92898e-18	-2.74705e-18	5.73386e-18	1.62459e-18	2.20954e-18	-1.51415e-18	-2.52946e-17	9.5342e-19	8.80503e-18	-2.32512e-17	-2.33549e-17	1.55236e-17	-3.15928e-18	-6.63136e-18	-9.00781e-18	-2.67226e-17	1.81637e-17	4.71038e-16	4.09126e-16	-3.10387e-16	3.74848e-16	1.42648e-17
2.26826e-29	7.03871e-29	4.37871e-29	-2.6373e-28	2.72798e-28	-1.59943e-28	-9.05025e-29	-1.27198e-26	-1.30537e-26	-7.3943e-26	2.81606e-26	-1.65178e-24	-6.39983e-24	2.90227e-25	8.30375e-25	-5.96008e-23	-1.32107e-23	-5.52461e-20	3.8393e-19	2.43921e-19	-2.55002e-19	1.53678e-18	1.52192e-18	1.17597e-18	-3.29985e-18	-2.89377e-17	-1.41893e-17	4.84708e-18	1.45563e-17	5.04314e-18	-1.05264e-17	-2.98249e-18	-4.05635e-18	2.77973e-18	4.64368e-17	-1.75032e-18	-1.61646e-17	4.26854e-17	4.28757e-17	-2.84987e-17	5.79993e-18	1.21741e-17	1.65369e-17	4.90582e-17	-3.33455e-17	-8.64748e-16	-7.51087e-16	5.69819e-16	-6.8816e-16	-2.61878e-17
-2.90363e-19	-8.51672e-19	2.95163e-19	7.89068e-19	-9.37584e-19	1.41008e-19	1.60421e-18	-2.5422e-18	1.71134e-17	-1.00717e-16	-2.81637e-17	-1.65962e-15	3.48985e-16	5.29644e-16	-6.49774e-16	-2.29023e-15	3.73243e-16	-7.45642e-15	-1.45508e-15	2.36441e-14	3.15973e-14	-2.17592e-14	-1.76058e-14	2.5874e-14	-6.2752e-14	-4.95297e-14	6.00031e-14	4.47062e-14	1.79082e-13	-3.86121e-14	2.05815e-13	-2.86815e-13	2.30877e-13	-1.56952e-14	-1.45055e-13	-2.4698e-13	-3.58523e-13	6.70205e-14	2.84269e-13	7.81994e-14	4.1038e-13	9.20294e-13	4.34112e-13	-6.21137e-13	1.15219e-12	-2.69193e-12	3.66659e-12	-1.5815e-12	5.09682e-12	6.62205e-13
-1.58349e-30	1.38998e-30	-1.25821e-29	2.33345e-29	-1.65623e-29	-2.01761e-29	-1.15116e-29	-2.40266e-29	-5.2343e-28	9.40878e-28	1.02446e-27	-1.34317e-26	3.89372e-27	-6.21286e-27	1.20772e-26	1.87635e-26	-5.04301e-27	-1.647e-26	-9.43747e-26	-3.97068e-25	-2.08576e-25	7.34138e-25	3.96996e-25	4.00315e-26	-1.28627e-24	1.2202e-24	-3.95711e-25	-2.38873e-24	7.6652e-25	2.25949e-24	-5.47068e-24	8.09088e-25	-2.82704e-24	1.72472e-23	7.09507e-25	4.25495e-24	-5.69504e-24	6.97372e-24	1.23119e-24	3.68719e-24	8.19944e-24	-5.02229e-24	-2.0989e-24	2.06906e-24	5.58016e-24	1.55675e-23	5.97761e-23	9.9526e-23	-5.38221e-23	5.09127e-23
-1.65532e-34	-5.14332e-34	-3.1855e-34	1.92195e-33	-1.98919e-33	1.16349e-33	6.56975e-34	9.2693e-32	9.52281e-32	5.38992e-31	-2.05278e-31	1.2039e-29	4.66438e-29	-2.1156e-30	-6.05201e-30	4.34386e-28	9.62851e-29	4.02649e-25	-2.79819e-24	-1.77776e-24	1.85852e-24	-1.12005e-23	-1.10922e-23	-8.57082e-24	2.40502e-23	2.10906e-22	1.03415e-22	-3.53269e-23	-1.0609e-22	-3.67558e-23	7.67195e-23	2.17372e-23	2.95638e-23	-2.02594e-23	-3.38444e-22	1.27568e-23	1.17812e-22	-3.11103e-22	-3.1249e-22	2.07707e-22	-4.22715e-23	-8.87281e-23	-1.20525e-22	-3.5755e-22	2.43031e-22	6.30252e-21	5.47413e-21	-4.153e-21	5.0155e-21	1.90864e-22
3.47085e-29	1.07879e-28	6.69946e-29	-4.03992e-28	4.17772e-28	-2.44721e-28	-1.3852e-28	-1.94746e-26	-1.99901e-26	-1.1321e-25	4.31214e-26	-2.52898e-24	-9.79866e-24	4.44337e-25	1.27139e-24	-9.12544e-23	-2.02269e-23	-8.45861e-20	5.87827e-19	3.73462e-19	-3.90428e-19	2.35293e-18	2.33019e-18	1.80051e-18	-5.05233e-18	-4.43059e-17	-2.17249e-17	7.42127e-18	2.22869e-17	7.72144e-18	-1.61168e-17	-4.56643e-18	-6.2106e-18	4.25599e-18	7.10984e-17	-2.67988e-18	-2.47493e-17	6.53548e-17	6.56461e-17	-4.36338e-17	8.88015e-18	1.86395e-17	2.53193e-17	7.51121e-17	-5.10546e-17	-1.324e-15	-1.14997e-15	8.72439e-16	-1.05363e-15	-4.00957e-17
-2.58668e-30	-8.02085e-30	-4.95422e-30	3.00333e-29	-3.10492e-29	1.82258e-29	1.02702e-29	1.44862e-27	1.48841e-27	8.42222e-27	-3.20481e-27	1.88125e-25	7.28878e-25	-3.30559e-26	-9.45667e-26	6.78797e-24	1.50459e-24	6.292e-21	-4.37259e-20	-2.77802e-20	2.90422e-20	-1.75024e-19	-1.73332e-19	-1.33932e-19	3.75821e-19	3.29573e-18	1.61602e-18	-5.52036e-19	-1.65782e-18	-5.74365e-19	1.19886e-18	3.39677e-19	4.6198e-19	-3.16585e-19	-5.28871e-18	1.99345e-19	1.84099e-18	-4.86146e-18	-4.88313e-18	3.24573e-18	-6.60556e-19	-1.38651e-18	-1.88339e-18	-5.58726e-18	3.79773e-18	9.84865e-17	8.55416e-17	-6.4897e-17	7.83748e-17	2.98254e-18
-1.65532e-34	-5.14332e-34	-3.1855e-34	1.92195e-33	-1.98919e-33	1.16349e-33	6.56975e-34	9.2693e-32	9.52281e-32	5.38992e-31	-2.05278e-31	1.2039e-29	4.66438e-29	-2.1156e-30	-6.05201e-30	4.34386e-28	9.62851e-29	4.02649e-25	-2.79819e-24	-1.77776e-24	1.85852e-24	-1.12005e-23	-1.10922e-23	-8.57082e-24	2.40502e-23	2.10906e-22	1.03415e-22	-3.53269e-23	-1.0609e-22	-3.67558e-23	7.67195e-23	2.17372e-23	2.95638e-23	-2.02594e-23	-3.38444e-22	1.27568e-23	1.17812e-22	-3.11103e-22	-3.1249e-22	2.07707e-22	-4.22715e-23	-8.87281e-23	-1.20525e-22	-3.5755e-22	2.43031e-22	6.30252e-21	5.47413e-21	-4.153e-21	5.0155e-21	1.90864e-22
-1.88598e-29	-5.85282e-29	-3.6284e-29	2.18803e-28	-2.26424e-28	1.32184e-28	7.46474e-29	1.05422e-26	1.08279e-26	6.12928e-26	-2.33465e-26	1.36902e-24	5.30416e-24	-2.40626e-25	-6.88169e-25	4.93965e-23	1.09492e-23	4.57874e-20	-3.18197e-19	-2.02159e-19	2.11343e-19	-1.27367e-18	-1.26135e-18	-9.74635e-19	2.73488e-18	2.39833e-17	1.17599e-17	-4.01721e-18	-1.20641e-17	-4.1797e-18	8.72419e-18	2.47186e-18	3.36186e-18	-2.30381e-18	-3.84863e-17	1.45065e-18	1.3397e-17	-3.53772e-17	-3.5535e-17	2.36195e-17	-4.80692e-18	-1.00898e-17	-1.37056e-17	-4.0659e-17	2.76364e-17	7.16694e-16	6.22493e-16	-4.7226e-16	5.70339e-16	2.17042e-17
4.58116e-29	1.87982e-28	-1.781e-28	4.15754e-29	4.29574e-28	-5.75588e-28	-1.29374e-28	-4.8279e-29	-5.75685e-27	4.28914e-27	-2.60162e-26	2.14271e-26	1.12154e-25	1.76881e-26	-5.149e-26	-5.24825e-25	-2.07999e-25	3.08056e-24	-2.79882e-24	-3.02943e-24	-6.46429e-24	-1.58918e-24	4.52594e-24	-1.94426e-24	1.24977e-23	-1.19575e-23	4.02142e-23	7.84551e-24	-3.24367e-23	5.93512e-24	-2.68465e-23	3.99997e-24	3.52836e-23	2.47595e-23	2.01653e-23	-1.40389e-23	2.95636e-23	-1.59461e-22	-1.32086e-22	1.26775e-22	1.29396e-23	-1.17896e-22	-4.1983e-23	4.77577e-23	5.58264e-22	-2.66781e-22	6.26287e-22	2.2782e-22	1.81286e-21	-3.92758e-22
-2.90363e-19	-8.51672e-19	2.95163e-19	7.89068e-19	-9.37584e-19	1.41008e-19	1.60421e-18	-2.5422e-18	1.71134e-17	-1.00717e-16	-2.81637e-17	-1.65962e-15	3.48985e-16	5.29644e-16	-6.49774e-16	-2.29023e-15	3.73243e-16	-7.45642e-15	-1.45508e-15	2.36441e-14	3.15973e-14	-2.17592e-14	-1.76058e-14	2.5874e-14	-6.2752e-14	-4.95297e-14	6.00031e-14	4.47062e-14	1.79082e-13	-3.86121e-14	2.05815e-13	-2.86815e-13	2.30877e-13	-1.56952e-14	-1.45055e-13	-2.4698e-13	-3.58523e-13	6.70205e-14	2.84269e-13	7.81994e-14	4.1038e-13	9.20294e-13	4.34112e-13	-6.21137e-13	1.15219e-12	-2.69193e-12	3.66659e-12	-1.5815e-12	5.09682e-12	6.62205e-13
7.5568e-29	2.34546e-28	1.44328e-28	-8.7477e-28	9.04536e-28	-5.30921e-28	-2.9924e-28	-4.22231e-26	-4.33644e-26	-2.45508e-25	9.3427e-26	-5.48313e-24	-2.12442e-23	9.63309e-25	2.75641e-24	-1.97847e-22	-4.38534e-23	-1.8339e-19	1.27446e-18	8.097e-19	-8.46483e-19	5.10136e-18	5.05205e-18	3.90367e-18	-1.09539e-17	-9.60593e-17	-4.71016e-17	1.609e-17	4.832e-17	1.67408e-17	-3.49427e-17	-9.90043e-18	-1.34652e-17	9.22737e-18	1.54148e-16	-5.81023e-18	-5.36587e-17	1.41695e-16	1.42327e-16	-9.46021e-17	1.9253e-17	4.04121e-17	5.48945e-17	1.6285e-16	-1.10691e-16	-2.87055e-15	-2.49325e-15	1.89153e-15	-2.28436e-15	-8.6931e-17
4.05168e-30	1.25547e-29	7.72148e-30	-4.68275e-29	4.84519e-29	-2.83291e-29	-1.5984e-29	-2.25741e-27	-2.3198e-27	-1.31262e-26	4.99806e-27	-2.93168e-25	-1.13585e-24	5.15216e-26	1.47371e-25	-1.0578e-23	-2.3447e-24	-9.80512e-21	6.81402e-20	4.32913e-20	-4.52579e-20	2.72749e-19	2.70112e-19	2.08713e-19	-5.8566e-19	-5.13589e-18	-2.51833e-18	8.60265e-19	2.58347e-18	8.9506e-19	-1.86824e-18	-5.29335e-19	-7.19926e-19	4.93349e-19	8.24165e-18	-3.10649e-19	-2.86891e-18	7.57585e-18	7.60962e-18	-5.05798e-18	1.02938e-18	2.16067e-18	2.93498e-18	8.7069e-18	-5.91819e-18	-1.53476e-16	-1.33304e-16	1.01132e-16	-1.22135e-16	-4.64784e-18
-4.79897e-29	-1.48798e-28	-9.22886e-29	5.56871e-28	-5.76058e-28	3.37333e-28	1.90751e-28	2.68546e-26	2.757e-26	1.56121e-25	-5.94567e-26	3.48738e-24	1.35116e-23	-6.12855e-25	-1.75305e-24	1.25831e-22	2.78915e-23	1.16637e-19	-8.10565e-19	-5.14974e-19	5.38368e-19	-3.24449e-18	-3.21313e-18	-2.48275e-18	6.96675e-18	6.10942e-17	2.99569e-17	-1.02333e-17	-3.07317e-17	-1.06472e-17	2.22237e-17	6.29673e-18	8.56391e-18	-5.86866e-18	-9.80389e-17	3.69534e-18	3.41272e-17	-9.01188e-17	-9.05206e-17	6.01674e-17	-1.2245e-17	-2.57023e-17	-3.49132e-17	-1.03573e-16	7.04001e-17	1.82568e-15	1.58572e-15	-1.20302e-15	1.45286e-15	5.52886e-17
2.09474e-28	6.49153e-28	4.01035e-28	-2.42256e-27	2.50821e-27	-1.46342e-27	-8.27108e-28	-1.16735e-25	-1.19856e-25	-6.78778e-25	2.58591e-25	-1.51593e-23	-5.87369e-23	2.66486e-24	7.62091e-24	-5.47002e-22	-1.21248e-22	-5.07035e-19	3.52361e-18	2.23865e-18	-2.34034e-18	1.41042e-17	1.39678e-17	1.07928e-17	-3.02852e-17	-2.65583e-16	-1.30226e-16	4.44853e-17	1.33594e-16	4.62847e-17	-9.66089e-17	-2.73725e-17	-3.72282e-17	2.55117e-17	4.26186e-16	-1.6064e-17	-1.48355e-16	3.91756e-16	3.93503e-16	-2.61554e-16	5.32303e-17	1.11731e-16	1.51771e-16	4.50245e-16	-3.06037e-16	-7.93644e-15	-6.89329e-15	5.22966e-15	-6.31576e-15	-2.40345e-16
1.13765e-21	-4.86431e-22	-5.04305e-21	7.24201e-21	3.03121e-22	3.00262e-21	8.04029e-21	-1.78744e-20	-1.37931e-19	2.40949e-19	-2.83787e-19	1.20433e-18	3.96262e-18	-4.86736e-18	-8.72905e-20	-5.97285e-18	-4.94519e-18	-1.57897e-16	9.27739e-17	5.32611e-17	-2.41943e-17	1.5282e-16	-3.84472e-17	-7.27218e-17	-1.9339e-16	-5.21431e-16	-4.59752e-16	2.64678e-16	-1.47476e-15	1.2679e-15	-1.12256e-15	2.06499e-15	4.80111e-16	-2.70845e-15	-9.5929e-15	9.84817e-16	-9.48078e-16	9.86372e-17	3.1347e-15	2.05648e-15	-2.78629e-15	5.49782e-15	1.3012e-15	2.07504e-15	4.11406e-16	-3.02475e-15	-6.5611e-16	-1.0632e-14	7.40521e-15	8.24793e-15
2.40603e-09	1.3327e-08	-4.36319e-09	-6.74556e-09	-1.68906e-09	-4.77087e-09	1.05538e-08	-3.4827e-08	-1.27385e-08	4.94661e-07	1.37249e-07	1.10788e-06	-6.58204e-06	-3.72518e-06	2.77118e-06	6.39691e-07	6.38698e-06	-9.28266e-05	8.19563e-05	-2.0201e-05	5.89929e-05	-3.87081e-05	-0.000441318	-0.000201562	0.00172148	0.000337052	-0.000812903	-0.000549313	-0.00129523	0.00212924	-0.00530102	0.00220513	0.00290829	-0.00162193	0.000844152	-0.000424749	-0.000661069	-0.00506872	-0.000949494	-0.00429131	-0.00589901	0.00359503	0.000873095	0.00129651	-0.0586746	0.00710302	-0.00856867	0.00634641	0.0110774	-0.0114388
-1.18764e-21	1.52634e-22	5.03552e-21	-6.84204e-21	1.81905e-22	-4.57832e-21	-7.63329e-21	1.77999e-20	1.36473e-19	-2.22436e-19	3.03955e-19	-1.40763e-18	-3.73114e-18	5.0134e-18	6.09314e-19	5.07629e-18	5.11941e-18	1.58777e-16	-7.7095e-17	-4.07021e-17	2.52778e-17	-1.53155e-16	5.44082e-17	5.52831e-17	1.58209e-16	5.63508e-16	4.5488e-16	-2.5111e-16	1.47763e-15	-1.17768e-15	1.05864e-15	-2.09322e-15	-3.93669e-16	2.75662e-15	9.34677e-15	-1.0918e-15	1.00149e-15	-3.28957e-16	-2.98069e-15	-2.21368e-15	2.82494e-15	-5.43496e-15	-1.3784e-15	-2.14907e-15	-6.23625e-17	3.65601e-15	-5.11052e-17	1.07171e-14	-4.67633e-15	-7.39826e-15
3.13003e-28	9.70509e-28	6.01023e-28	-3.6289e-27	3.75437e-27	-2.20213e-27	-1.24221e-27	-1.75121e-25	-1.79704e-25	-1.01812e-24	3.87469e-25	-2.27389e-23	-8.81037e-23	3.99481e-24	1.1431e-23	-8.20502e-22	-1.81869e-22	-7.60552e-19	5.28542e-18	3.35797e-18	-3.51051e-18	2.11563e-17	2.09518e-17	1.61892e-17	-4.54278e-17	-3.98375e-16	-1.95339e-16	6.6728e-17	2.00391e-16	6.9427e-17	-1.44913e-16	-4.10588e-17	-5.58423e-17	3.82675e-17	6.39278e-16	-2.4096e-17	-2.22532e-16	5.87634e-16	5.90254e-16	-3.92332e-16	7.98455e-17	1.67596e-16	2.27657e-16	6.75367e-16	-4.59055e-16	-1.19047e-14	-1.03399e-14	7.84449e-15	-9.47364e-15	-3.60518e-16
0.00368904	-0.000205264	0.00297014	-0.0122718	0.0142506	-0.00618582	0.00199113	-0.228533	-0.00124578	0.000192586	0.000440471	0.00117907	0.00105808	0.00222231	0.00207132	0.00227657	0.00426011	0.0294016	-0.467011	0.32763	-0.151182	-0.0181875	0.51789	0.201796	-0.0981852	-0.492272	-0.177218	0.0357086	0.047014	0.0179467	0.00305704	-0.00880974	0.00393083	0.0172621	0.023783	-0.00556035	0.00336403	-0.00172552	-0.00397258	-0.00263246	-0.0106122	0.0112226	-0.00425803	0.0181285	-0.00889711	0.00184542	-0.00042286	4.33949e-05	-0.00209994	6.634e-05
1.59794e-33	3.07793e-33	-5.75903e-33	-1.99999e-33	1.09124e-32	-1.77767e-32	-1.36282e-33	-2.04765e-33	-3.14992e-32	1.53144e-31	-9.26968e-31	4.35039e-31	2.27204e-30	2.26447e-30	-1.42276e-30	-6.85307e-30	-2.39385e-30	1.46907e-28	-5.95745e-29	-5.18928e-29	-1.3423e-28	-1.29608e-28	1.53932e-28	-5.63978e-29	3.96412e-28	-2.88901e-28	8.28896e-28	-1.76449e-28	-1.21092e-27	1.00414e-27	-3.48444e-28	1.68881e-28	1.1909e-27	7.61546e-28	2.44603e-28	-2.04987e-27	4.28493e-27	-1.52619e-27	-2.38573e-27	3.78055e-27	2.82831e-28	-2.57613e-27	-2.5777e-27	9.49305e-28	1.45119e-26	-6.77112e-27	1.9591e-26	6.2448e-27	4.06936e-26	1.23114e-26
-4.59089e-09	4.20875e-09	1.23041e-08	8.09323e-09	-4.42618e-09	-1.86691e-09	1.18259e-08	2.54026e-08	-2.30706e-07	-3.81894e-07	3.32227e-07	-2.66538e-06	-3.12581e-06	7.71821e-06	8.80695e-06	3.38472e-06	-1.91111e-06	-2.6074e-05	0.000360788	0.000195616	-0.00034369	-8.04764e-05	0.000326903	0.000320519	4.1336e-05	0.000449436	0.0011345	-0.000272995	0.000443609	-0.000401244	-0.00292981	-0.0032578	0.000430631	-0.00119678	-0.00266414	0.000816325	0.00414753	0.00325716	0.000105899	0.00193431	0.00138195	-0.00138827	0.00183029	-0.00210856	-0.0113974	0.0107656	-0.013982	0.0013716	0.00205455	-0.0793544
0.00368882	-0.000206773	0.00296971	-0.0122693	0.0142525	-0.00618571	0.00199251	-0.2285	-0.00126727	0.000198403	0.000332382	1.14553e-05	-0.000143436	0.000296011	-4.62198e-07	-3.79793e-06	5.41771e-05	0.00822042	-0.0379885	0.022476	0.00884588	-0.0160856	-0.0237315	-0.011375	-0.042281	0.0850162	0.0809045	-0.0035946	0.00105688	-0.086219	0.205528	-0.0382529	-0.0864134	0.0200728	-0.155447	0.093488	-0.0070414	0.108504	0.045326	0.208847	0.0680609	-0.304495	0.0942428	-0.0336014	-0.0710493	0.00420283	0.0032344	-0.00158797	-0.00308387	0.0138795
-1.23987e-29	-3.84885e-29	-2.37944e-29	1.43885e-28	-1.48909e-28	8.69692e-29	4.90104e-29	6.9285e-27	7.12642e-27	4.02841e-26	-1.53509e-26	8.997e-25	3.48607e-24	-1.58114e-25	-4.52319e-25	3.24653e-23	7.19612e-24	3.00931e-20	-2.09131e-19	-1.32866e-19	1.38902e-19	-8.371e-19	-8.29008e-19	-6.40566e-19	1.79746e-18	1.57627e-17	7.72906e-18	-2.64026e-18	-7.92898e-18	-2.74705e-18	5.73386e-18	1.62459e-18	2.20954e-18	-1.51415e-18	-2.52946e-17	9.5342e-19	8.80503e-18	-2.32512e-17	-2.33549e-17	1.55236e-17	-3.15928e-18	-6.63136e-18	-9.00781e-18	-2.67226e-17	1.81637e-17	4.71038e-16	4.09126e-16	-3.10387e-16	3.74848e-16	1.42648e-17
-0.00737778	0.000413062	-0.00593906	0.0245383	-0.0285051	0.012371	-0.00398523	0.457004	0.00252452	-0.000385139	-0.000675565	-0.000177271	0.000174278	2.00119e-05	-0.00017891	-0.000361556	-0.00143381	-0.0095793	0.0962278	-0.0287479	0.00189737	0.0618002	0.0815284	0.0213175	-0.139503	-0.208557	0.0325502	-0.00394405	0.0817567	-0.15157	0.353192	-0.0739445	-0.139059	0.0597781	-0.0207162	0.00407712	-0.0262572	0.0447913	0.0133169	0.104424	-0.0456124	0.0335624	0.00368545	0.0404999	-0.0467618	0.0038804	0.00233385	-0.00795421	-0.0124556	0.00513063
1.52472e-33	-3.03419e-33	9.66041e-33	5.02131e-33	3.50298e-33	-2.09228e-32	1.11917e-32	1.41025e-32	-4.33236e-32	-6.40705e-31	7.29641e-31	-4.20545e-30	2.03861e-30	1.99739e-30	-8.73148e-31	-5.89941e-31	2.95712e-29	3.60614e-29	-6.83375e-29	3.60182e-28	6.28978e-28	-3.38537e-28	5.33261e-28	3.84797e-28	1.16105e-27	2.11601e-27	-8.48211e-28	-5.8801e-28	8.55265e-28	9.16993e-28	-1.68787e-27	-1.29996e-28	-1.9103e-27	-3.34553e-27	4.07871e-28	-1.42834e-27	-1.17428e-27	2.38168e-27	8.16802e-27	1.65571e-27	7.21555e-27	3.86963e-27	1.00143e-26	3.91324e-27	1.49165e-27	4.03517e-26	1.64662e-26	3.50414e-27	-3.28006e-26	-1.48125e-26
-0.00368792	0.000207245	-0.00296973	0.0122689	-0.01425	0.00618409	-0.00199451	0.228463	0.00125852	-0.000172697	-0.000187385	0.000691902	0.000620154	-3.66312e-05	0.000564111	0.000618987	0.00478239	0.0867189	-0.475745	0.207064	0.0636996	-0.239647	-0.289343	-0.0850354	0.00314232	0.113689	0.0529949	-0.0119314	-0.0328698	-0.00762082	0.025049	0.00412896	-0.0107286	0.000450226	-0.00872386	-0.0014722	-0.00156888	-0.00109236	0.00508928	0.000155615	-0.0115764	0.0123677	-0.00141184	0.00280554	0.000887828	-0.000173779	0.000661602	-0.000782196	0.000229471	-0.000689224
0	0	0	0	0	0	0	0	0	0	0	0	0	0	0	0	0	0	0	0	0	0	0	0	0	0	0	0	0	0	0	0	0	0	0	0	0	0	0	0	0	0	0	0	0	0	0	0	0	0
-3.47085e-29	-1.07879e-28	-6.69946e-29	4.03992e-28	-4.17772e-28	2.44721e-28	1.3852e-28	1.94746e-26	1.99901e-26	1.1321e-25	-4.31214e-26	2.52898e-24	9.79866e-24	-4.44337e-25	-1.27139e-24	9.12544e-23	2.02269e-23	8.45861e-20	-5.87827e-19	-3.73462e-19	3.90428e-19	-2.35293e-18	-2.33019e-18	-1.80051e-18	5.05233e-18	4.43059e-17	2.17249e-17	-7.42127e-18	-2.22869e-17	-7.72144e-18	1.61168e-17	4.56643e-18	6.2106e-18	-4.25599e-18	-7.10984e-17	2.67988e-18	2.47493e-17	-6.53548e-17	-6.56461e-17	4.36338e-17	-8.88015e-18	-1.86395e-17	-2.53193e-17	-7.51121e-17	5.10546e-17	1.324e-15	1.14997e-15	-8.72439e-16	1.05363e-15	4.00957e-17
1.65532e-34	5.14332e-34	3.1855e-34	-1.92195e-33	1.98919e-33	-1.16349e-33	-6.56975e-34	-9.2693e-32	-9.52281e-32	-5.38992e-31	2.05278e-31	-1.2039e-29	-4.66438e-29	2.1156e-30	6.05201e-30	-4.34386e-28	-9.62851e-29	-4.02649e-25	2.79819e-24	1.77776e-24	-1.85852e-24	1.12005e-23	1.10922e-23	8.57082e-24	-2.40502e-23	-2.10906e-22	-1.03415e-22	3.53269e-23	1.0609e-22	3.67558e-23	-7.67195e-23	-2.17372e-23	-2.95638e-23	2.02594e-23	3.38444e-22	-1.27568e-23	-1.17812e-22	3.11103e-22	3.1249e-22	-2.07707e-22	4.22715e-23	8.87281e-23	1.20525e-22	3.5755e-22	-2.43031e-22	-6.30252e-21	-5.47413e-21	4.153e-21	-5.0155e-21	-1.90864e-22
0.00737766	-0.000413641	0.00593899	-0.0245381	0.0285051	-0.0123711	0.00398484	-0.456995	-0.00254044	0.000408721	0.000651723	-0.000196797	-0.000306273	0.000274294	-0.000211781	-0.000195642	0.000178664	0.0137904	-0.0373447	0.0211393	0.0262314	-0.0355805	-0.0757811	-0.033709	-0.0843022	0.161285	0.147226	-0.0503434	0.0654327	-0.202643	0.441346	-0.0826075	-0.169286	0.0826985	0.162249	-0.137956	-0.0493297	-0.0752386	-0.0260287	-0.106458	-0.204856	0.542952	-0.135421	0.130472	0.0205153	-1.93197e-06	0.000655942	-0.0147017	-0.0195873	-0.0109865
1.49955e-21	1.00137e-20	2.25851e-22	-1.19985e-20	-1.45507e-20	4.72701e-20	-1.22096e-20	2.23684e-21	4.37595e-20	-5.55397e-19	-6.05045e-19	6.09885e-18	-6.9443e-18	-4.3811e-18	-1.56606e-17	2.68967e-17	-5.22667e-18	-2.63749e-17	-4.7037e-16	-3.76762e-16	-3.25067e-17	1.00603e-17	-4.78828e-16	5.23162e-16	1.05538e-15	-1.26233e-15	1.46156e-16	-4.07041e-16	-8.60439e-17	-2.70653e-15	1.91777e-15	8.46833e-16	-2.59324e-15	-1.44504e-15	7.38382e-15	3.20966e-15	-1.60243e-15	6.9095e-15	-4.62042e-15	4.71594e-15	-1.15937e-15	-1.88582e-15	2.31601e-15	2.22082e-15	-1.04709e-14	-1.89373e-14	2.12163e-14	-2.55481e-15	-8.18646e-14	-2.54904e-14
-7.31243e-27	-2.27098e-26	-1.39611e-26	8.47708e-26	-8.75984e-26	5.1364e-26	2.90244e-26	4.08686e-24	4.19636e-24	2.37626e-23	-9.04664e-24	5.30766e-22	2.05643e-21	-9.3249e-23	-2.6682e-22	1.91514e-20	4.24499e-21	1.7752e-17	-1.23367e-16	-7.83781e-17	8.19386e-17	-4.93807e-16	-4.89034e-16	-3.77871e-16	1.06033e-15	9.29844e-15	4.55939e-15	-1.55749e-15	-4.67732e-15	-1.62049e-15	3.38241e-15	9.58351e-16	1.30341e-15	-8.932e-16	-1.49214e-14	5.62424e-16	5.1941e-15	-1.37159e-14	-1.37771e-14	9.15739e-15	-1.86367e-15	-3.91185e-15	-5.31373e-15	-1.57637e-14	1.07148e-14	2.77866e-13	2.41344e-13	-1.83098e-13	2.21124e-13	8.41483e-15
[truncated: 463 more columns]

## Sheet: iMO1086_Reactions
RR03514
RR04316
RR00220
RR01408
RR03588
RR01849
RR00988
RR08615
RR00511
RR00695
RR10077
RR00689
RR03016
RR02406
RR03487
RR02006
RR00311
RR01725
RR09957
RR04012
RR03649
RR00674
RR01999
RR01123
RR03675
RR00465
RR00706
RR02468
RR02510
RR02222
RR00772
RR00131
RR02474
RR00181
RR04241
RR01903
RR00364
RR04302
RR03546
RR00704
RR00681
RR01048
RR00685
RR09683
RR02500
RR00598
RR04368
RR00690
RR03019
RR01180
RR01607
RR01898
RR03815
RR09911
RR01292
RR00902
RR01747
RR00438
RR00214
RR00221
RR03774
RR00563
RR01967
RR00417
RR03681
RR00693
RR08593
RR08672
RR08879
RR08812
RR01726
RR03676
RR00464
RR02325
RR00562
RR03658
RR04185
RR01103
RR03031
RR02244
RR00362
RR00652
RR00171
RR03591
RR00546
RR03512
RR08678
RR01018
RR08885
RR00667
RR01902
RR00109
RR08739
RR00779
RR00529
RR03822
RR03001
RR03894
RR00397
RR03757
RR01150
RR00157
RR03873
RR00432
RR00519
RR00771
RR01295
RR00708
RR00082
RR00147
RR00710
RR01210
RR01142
RR00268
RR00191
RR02467
RR00446
RR00617
RR00079
RR01271
RR00989
RR01071
RR00126
RR02306
RR02346
RR00448
RR00216
RR00170
RR09945
RR00179
RR03500
RR01873
RR03551
RR02499
RR01014
RR01290
RR00592
RR01583
RR01988
RR03769
RR02464
RR04183
RR01151
RR01272
RR10027
RR01155
RR08670
RR08916
RR03692
RR08939
RR09730
RR00818
RR08674
RR01038
RR00245
RR00703
RR00219
RR01358
RR00146
RR00111
RR01486
RR03691
IR00559
IR09629
IR09682
IR10309
IR09666
IR08963
IR09643
IR07938
IR07449
IR10355
IR04564
IR10361
IR10053
IR01932
IR09934
IR02616
IR01364
IR00634
IR07898
IR04340
IR09638
IR10204
IR08954
IR10059
IR03510
IR09624
IR02466
IR08752
IR01573
IR09633
IR02020
IR00548
IR09685
IR04284
IR08984
IR10347
IR03024
IR01792
IR10019
IR08894
IR01816
IR01357
IR09640
IR09968
IR02345
IR06190
IR10350
IR03879
IR06875
IR08944
IR01778
IR09651
IR09970
IR02434
IR10058
IR02265
IR09658
IR10383
IR03823
IR03881
IR00244
IR09999
IR00246
IR10360
IR03586
IR01832
IR10008
IR04285
IR10338
IR05172
IR05334
IR01734
IR00001
IR10346
IR10351
IR00120
IR09917
IR01814
IR00254
IR07969
IR09659
IR08913
IR10335
IR10359
IR03570
IR04345
IR00235
IR00094
IR10000
IR04010
IR02668
IR00265
IR00791
IR10013
IR03552
IR09919
IR10344
IR03527
IR09375
IR00633
IR02023
IR10057
IR10358
IR03030
IR00990
IR01614
IR00275
IR09630
IR09969
IR01746
IR10339
IR10062
IR09973
IR09684
IR09646
IR09686
IR00224
IR02264
IR09309
IR10352
IR05151
IR01582
IR09650
IR09661
IR05416
IR00947
IR09644
IR01238
IR05071
IR04344
IR10354
IR10021
IR09664
IR09920
IR01933
IR10049
IR10357
IR10334
IR01001
IR06045
IR00414
IR03486
IR10336
IR01804
IR02357
IR00394
IR00048
IR09631
IR01409
IR04295
IR04343
IR00293
IR01611
IR00322
IR00984
IR00946
IR00028
IR00589
IR09687
IR01115
IR10381
IR09645
IR00461
IR09308
IR08946
IR01869
IR04962
IR10069
IR00832
IR03607
IR03648
IR00781
IR03583
IR04369
IR04182
IR02782
IR05143
IR00316
IR10356
IR09662
IR10342
IR10022
IR08910
IR04342
IR03021
IR00114
IR04044
IR00642
IR09620
IR09634
IR10115
IR04559
IR03777
IR02019
IR10364
IR06307
IR00776
IR04850
IR09655
IR09648
IR09593
IR00314
IR00985
IR01467
IR08920
IR00555
IR01017
IR09653
IR03797
IR10345
IR06768
IR10031
IR07876
IR00074
IR00986
IR00890
IR01289
IR09306
IR02024
IR03022
IR10337
IR05641
IR00841
IR04297
IR08875
IR08708
IR08934
IR10067
IR01534
IR04292
IR01097
IR06714
IR10363
IR09965
IR01996
IR00616
IR02664
IR10386
IR09652
IR10378
IR00962
IR04310
IR09304
IR03609
IR10349
IR02277
IR07961
IR03784
IR09621
IR09962
IR00006
IR03033
IR08425
IR09654
IR10023
IR09949
IR03505
IR04615
IR09649
IR04052
IR09592
IR00955
IR01735
IR08758
IR00522
IR00599
IR10382
IR10385
IR01443
IR01833
IR00095
IR00601
IR03032
IR03652
IR03023
IR06374
IR10039
IR08605
IR04347
IR09622
IR10017
IR01158
IR10340
IR00973
IR02961
IR01046
IR05211
IR04244
IR03677
IR01366
IR06237
IR08876
IR09889
IR04298
IR03622
IR10362
IR10048
IR09992
IR09642
IR04341
IR10384
IR02475
IR07919
IR09656
IR08729
IR09305
IR10343
IR09681
IR09680
IR10006
IR04238
IR03226
IR04346
IR01527
IR00149
IR09991
IR10372
IR08874
IR04050
IR03610
IR04315
IR03761
IR00156
IR00283
IR09632
IR00059
IR03590
IR02300
IR09641
IR08155
IR09619
IR00945
EX_EC0009
EX_EC9595
EX_EC3026
EX_EC9596
EX_EC9324
EX_EC0001
EX_EC9582
EX_EC0098
EX_EC0071
EX_EC0221
EX_EC0957
EX_EC0062
EX_EC0011
EX_EC0027
EX_EC0048
EX_EC0021
EX_EC0065
EX_EC9594
EX_EC0007

## Sheet: Yeast_loadings
9.69549e-22	-1.08785e-19	1.88269e-18	4.77198e-18	8.06847e-20	-9.86366e-19	9.24926e-19	-2.4897e-17	-9.06783e-16	5.46614e-16	-2.82611e-17	1.16555e-16	-1.86939e-15	1.21971e-15	1.90652e-15	-1.22641e-15	5.01058e-15	7.27726e-15	-5.93632e-15	-5.01085e-15	2.11984e-15	-1.80094e-14	1.08472e-14	3.67298e-16	1.20828e-14	-6.15084e-14	-8.45519e-14	-4.21385e-14	6.2446e-14	1.43888e-13	5.04086e-14	-1.25876e-13	3.27102e-14	-2.00022e-13	-1.50099e-13	4.71551e-13	-2.47099e-14	-2.16845e-13	-6.81061e-13	9.66847e-14	-9.35505e-13	-8.33012e-12	5.48192e-12	-3.27785e-12	-2.08273e-12	-2.50278e-11	3.71739e-11	-5.14431e-10	2.02422e-09	-0.015385
6.18194e-10	-3.88253e-09	0.000292418	0.000408425	0.000319235	-0.000224299	-0.000540799	0.00321394	0.0173496	-0.00604105	-3.10402e-06	-0.000683469	-0.00629994	-0.0120203	-0.0178943	-0.00558764	-0.0199894	-0.029476	-0.0904324	-0.0451375	-0.0444238	-0.0293024	0.0800495	-0.00113998	0.0166323	-0.0038514	-0.0695035	-0.134976	-0.0525495	0.127678	-0.0557639	-0.180113	-0.0431983	-0.0914806	0.0454782	0.0508747	0.134664	-0.0706187	0.0293254	-0.161662	-0.0171859	0.0507287	-0.026544	-0.0478654	0.0423191	0.397937	-0.0524278	-0.0020917	-0.000178425	-2.97391e-09
-4.76107e-16	1.61864e-14	1.13073e-12	-2.82466e-12	-5.27288e-13	-8.41358e-12	1.90673e-11	-2.06535e-12	1.48269e-11	-2.20741e-11	-3.24464e-13	-1.8186e-11	1.97703e-10	7.23867e-11	-2.12901e-10	-8.35331e-11	5.55721e-11	-7.71344e-10	-8.2167e-10	-2.68167e-10	3.9472e-10	-1.6712e-10	-4.0768e-10	-1.18599e-10	2.46716e-10	4.75869e-10	4.36134e-10	-4.48148e-10	4.6364e-10	1.68068e-09	8.45663e-10	-3.07077e-09	-6.98743e-10	-1.98959e-09	-7.32912e-10	2.05664e-09	5.24178e-10	-7.69865e-10	-1.56679e-09	5.17118e-09	-7.70367e-10	-5.99088e-09	7.0673e-09	-3.18924e-09	-7.60967e-10	1.29007e-07	-2.62122e-08	4.52609e-07	5.05059e-07	0.00134926
6.18194e-10	-3.88253e-09	0.000292418	0.000408425	0.000319235	-0.000224299	-0.000540799	0.00321394	0.0173496	-0.00604105	-3.10402e-06	-0.000683469	-0.00629994	-0.0120203	-0.0178943	-0.00558764	-0.0199894	-0.029476	-0.0904324	-0.0451375	-0.0444238	-0.0293024	0.0800495	-0.00113998	0.0166323	-0.0038514	-0.0695035	-0.134976	-0.0525495	0.127678	-0.0557639	-0.180113	-0.0431983	-0.0914806	0.0454782	0.0508747	0.134664	-0.0706187	0.0293254	-0.161662	-0.0171859	0.0507287	-0.026544	-0.0478654	0.0423191	0.397937	-0.0524278	-0.0020917	-0.000178357	-6.48804e-10
-1.81898e-08	-1.03549e-06	0.00251042	-0.0025959	-0.0117113	0.00607183	0.159676	-0.0421316	0.143432	0.292193	-0.10395	0.0492998	-0.133041	-0.530197	0.347036	-0.0259082	0.0162063	0.284078	0.0373247	0.0953927	-0.368819	0.247503	0.0352652	0.0108695	-0.166591	0.0180367	0.187146	-0.209971	-0.130323	-0.0970466	-0.0582691	0.0239866	0.0510141	-0.00442475	0.0261625	0.0164747	-0.00925617	0.034003	0.0185694	0.000969572	0.0226598	0.00950718	0.00265056	0.000285214	0.000424904	-9.5387e-05	0.000205183	2.94367e-05	-1.77715e-06	1.42933e-11
-4.79025e-09	-4.79652e-07	0.0121637	0.0167309	0.0100367	-0.00285967	0.0426994	0.098665	-0.160838	-0.274322	0.12121	-0.0791972	0.0919861	-0.00170119	0.0924844	-0.0870442	-0.00452233	0.115669	-0.0947224	-0.041161	0.11015	0.047677	-0.130647	0.0156169	-0.241177	-0.11563	0.174651	0.0727453	-0.216012	-0.00982424	-0.0459137	0.0998575	0.183167	0.00722942	-0.012681	0.164002	-0.236602	0.0487965	-0.464242	0.0183274	0.205467	0.110491	-0.0689735	-0.111694	0.0741386	0.223684	0.0933215	0.385216	-0.0102221	-6.26873e-09
-3.02511e-21	5.4254e-20	-4.38835e-14	7.18041e-14	2.64726e-13	5.4495e-13	3.27589e-12	9.33847e-13	1.87861e-12	4.1309e-12	7.4678e-13	1.51551e-12	-1.36125e-11	-2.80366e-11	4.64387e-11	3.26511e-11	4.72304e-11	4.0048e-11	5.77064e-13	2.63848e-11	-1.33018e-11	7.99593e-11	-1.91109e-11	-5.47709e-12	-2.21367e-11	1.56601e-10	-5.78466e-11	-4.65634e-11	9.50497e-11	3.64416e-15	8.30442e-11	7.15896e-11	-8.03595e-11	2.55495e-10	2.83124e-10	-1.2344e-10	8.92895e-11	-5.92476e-11	2.70697e-10	6.78914e-10	3.08091e-10	4.49083e-10	1.13129e-09	-4.09781e-10	1.26608e-10	6.24626e-09	-1.13214e-08	1.38953e-07	1.93279e-06	0.00611511
-2.23405e-08	-2.082e-06	0.0260557	0.0307528	0.0107144	-0.00056947	0.203017	0.0297894	-0.0490773	-0.0335505	0.0166506	-0.049686	0.131054	0.0198357	-0.00080796	-0.0660035	-0.051555	-0.00167403	0.0713232	0.0761193	0.0883364	-0.00377446	-0.0991656	-0.0169343	0.131004	-0.0256783	0.360239	-0.0847833	0.133076	0.00718119	-0.117321	-0.116338	-0.0469732	0.0320935	0.0359937	0.222687	-0.00725214	-0.0999965	0.0362382	-0.0392292	-0.142816	-0.0129144	0.0715889	0.158408	-0.182608	0.00428068	0.00229924	5.94446e-05	1.52241e-06	0.00042137
-2.87637e-22	2.03505e-20	-1.70997e-15	7.19889e-15	-1.5294e-13	-6.90737e-14	1.94089e-12	3.20626e-12	-1.3348e-12	-9.24186e-13	-7.58834e-13	-2.01258e-12	1.25199e-11	-1.88152e-11	2.40339e-11	-3.21389e-11	9.03878e-12	3.68915e-11	8.24323e-11	1.93867e-11	1.41797e-11	2.31299e-11	-4.91481e-11	3.64086e-11	-6.07395e-11	-1.33445e-11	1.91287e-10	1.82379e-10	-6.30864e-11	-1.33012e-10	1.62392e-12	3.06063e-10	4.93899e-11	-5.97963e-11	-1.52297e-10	3.02183e-10	-1.5132e-10	6.93164e-11	-3.00212e-10	-5.55458e-11	-3.03931e-10	-3.99434e-10	-3.62781e-10	1.45947e-10	-5.23057e-11	-8.25875e-09	7.93734e-09	-4.01162e-08	-8.67664e-07	0.00175568
4.84774e-22	-5.4282e-20	1.25272e-15	7.96901e-16	-6.63408e-14	-3.68232e-14	-4.85919e-12	-1.74646e-12	-1.19604e-12	-3.20436e-12	-7.28401e-13	-2.7516e-12	-2.00348e-12	-1.37297e-11	1.4737e-11	3.1974e-11	-1.44708e-11	1.14968e-10	1.78871e-10	9.39031e-11	-1.44616e-11	1.38632e-10	-1.0857e-10	4.87284e-11	-4.61263e-11	-1.46217e-10	1.00494e-10	2.89511e-10	-2.64819e-12	-6.07949e-11	-1.05694e-11	2.03903e-10	1.68103e-10	-1.0074e-10	-3.55778e-10	5.57283e-10	-1.29238e-10	3.22093e-10	-4.63346e-10	-1.47986e-10	-3.4725e-10	-1.29486e-10	-1.43953e-09	1.10444e-09	1.65809e-11	-3.10498e-08	1.59041e-08	-1.76381e-07	-1.51899e-06	-0.00446746
4.84774e-22	-5.42943e-20	1.53018e-15	-1.44983e-15	5.21186e-16	1.83384e-15	1.50038e-12	2.07028e-12	-1.16214e-12	-1.16179e-12	3.72156e-14	-2.28953e-12	8.48442e-12	-2.38349e-11	3.3523e-11	3.9744e-12	1.00314e-11	7.42936e-11	1.3125e-10	6.96553e-11	1.08945e-11	8.63851e-11	-1.13664e-10	3.36096e-11	-5.99917e-11	-4.34178e-11	1.55997e-10	2.59868e-10	3.69547e-11	-1.76993e-10	1.64263e-10	2.49783e-10	3.73115e-11	1.48435e-10	-1.55418e-10	5.73469e-10	-3.33089e-12	3.07024e-10	-3.21031e-10	9.95509e-10	-3.98921e-11	1.27941e-10	-1.17203e-10	3.59242e-10	3.26493e-11	-1.5598e-08	2.87313e-09	4.44393e-08	5.28391e-07	-0.00446748
-2.87637e-22	2.03505e-20	-5.97853e-16	5.5072e-16	6.23015e-16	-1.33885e-16	-3.89188e-14	-1.20337e-13	3.62445e-13	8.87775e-13	-2.63134e-13	1.19799e-12	6.77514e-13	4.03212e-11	-6.51419e-11	1.70461e-11	-7.13678e-11	-3.99401e-11	-4.26408e-11	-3.3879e-11	-2.71306e-11	-5.57323e-11	9.09289e-11	-1.77987e-11	9.95896e-11	-2.0687e-10	-2.74611e-10	-2.27508e-10	-1.73724e-10	2.57193e-10	-6.09742e-10	-9.67442e-11	2.14513e-10	-6.42282e-10	-5.88448e-11	-1.41494e-09	-5.04403e-10	-8.10512e-10	3.36929e-10	-4.52199e-09	-6.2265e-10	-6.36745e-10	-1.76634e-09	6.49403e-11	-5.0678e-10	1.30838e-08	1.22373e-08	-4.41881e-07	-4.73845e-06	0.00175565
-2.87637e-22	2.03505e-20	-6.00587e-16	5.49567e-16	6.29935e-16	-1.29472e-16	-6.56905e-15	2.07472e-15	6.30033e-15	1.4563e-14	-1.21209e-13	9.5669e-15	4.18334e-13	-7.33977e-13	8.90537e-13	-1.37469e-11	8.99373e-12	-1.87883e-11	-2.8852e-11	-1.90526e-11	-1.32765e-11	-1.58519e-11	3.22068e-11	-2.51682e-13	9.82444e-12	6.26848e-11	1.09338e-11	-5.09865e-11	-2.96173e-11	2.18773e-11	-9.13296e-11	1.62672e-12	-1.72467e-11	-7.9868e-11	3.02989e-11	-1.45946e-10	-1.1119e-11	-1.34904e-10	4.03644e-11	-4.63072e-10	-8.16861e-11	-2.54509e-10	3.63708e-11	-1.39264e-10	1.74895e-11	4.31615e-09	2.75864e-10	-2.53097e-08	-3.21502e-07	0.00175566
-2.87637e-22	2.03505e-20	-5.97843e-16	5.50595e-16	6.28632e-16	-1.29004e-16	-6.43738e-15	2.5717e-15	1.33273e-14	7.17455e-14	-9.3696e-13	-1.01897e-12	-1.09248e-12	-3.27613e-11	4.52622e-11	3.51858e-11	9.35704e-13	1.5359e-10	2.08231e-10	1.08108e-10	3.75078e-11	1.66532e-10	-1.45961e-10	4.56422e-11	-1.04759e-10	-1.17119e-10	1.29047e-10	2.37772e-10	-5.64585e-11	-1.20801e-10	3.39304e-11	3.76548e-10	1.84521e-10	-3.46866e-11	-1.4693e-10	3.51103e-10	-3.15147e-10	1.16976e-10	-2.34833e-10	-3.92993e-10	-3.45058e-10	2.18184e-10	-1.01818e-09	7.00285e-10	-1.30287e-10	-2.14846e-08	1.04062e-08	-1.52422e-07	-1.19268e-06	0.0017557
4.84774e-22	-5.42943e-20	1.52441e-15	-1.39137e-15	-1.60706e-15	3.29186e-16	1.6529e-14	-7.51364e-15	8.59398e-16	8.32525e-15	-6.86088e-13	-1.62952e-13	-3.506e-14	-2.7471e-12	6.36407e-12	2.02778e-11	-1.07964e-11	6.20574e-11	7.57602e-11	3.58639e-11	2.10008e-11	5.8454e-11	-4.37311e-11	1.55009e-11	-3.16834e-11	-9.79978e-11	7.69688e-12	6.06592e-11	-4.91852e-11	-7.33441e-12	-7.6788e-11	1.35177e-10	1.18079e-10	-1.07978e-10	-5.7511e-11	-1.04208e-10	-2.29656e-10	-8.8226e-11	-2.18303e-11	-8.92835e-10	-2.34568e-10	8.80726e-11	-6.96919e-10	2.6672e-10	-1.81013e-10	-6.03408e-09	5.91283e-09	-1.30238e-07	-1.26033e-06	-0.00446747
4.84774e-22	-5.4282e-20	1.53173e-15	-1.4036e-15	-1.61122e-15	3.34974e-16	1.65587e-14	-7.4011e-15	1.88881e-15	2.32948e-14	5.48956e-13	1.29078e-13	-5.57167e-13	-9.84416e-11	1.43581e-10	5.59266e-11	4.7718e-11	3.71754e-10	5.3382e-10	2.8805e-10	5.61571e-11	4.017e-10	-4.39228e-10	1.1358e-10	-2.50819e-10	-2.26379e-10	4.51317e-10	8.91483e-10	1.38036e-10	-5.21008e-10	4.4533e-10	7.79574e-10	2.90844e-10	3.96593e-10	-6.29356e-10	1.79674e-09	-2.26428e-10	1.11378e-09	-1.13324e-09	2.56486e-09	-2.51255e-10	8.17517e-10	-1.54688e-09	1.87316e-09	-1.31306e-10	-6.31709e-08	1.83899e-08	-3.81177e-08	2.62691e-07	-0.00446737
4.84774e-22	-5.42943e-20	1.52441e-15	-1.39137e-15	-1.60706e-15	3.29186e-16	1.6529e-14	-7.51622e-15	1.55365e-15	1.77198e-14	1.31598e-13	4.44199e-14	2.53317e-13	2.65382e-11	-3.10243e-11	5.52318e-12	-2.33636e-11	-4.75939e-11	-7.23493e-11	-3.73237e-11	-2.13925e-11	-4.61448e-11	7.20847e-11	-2.71433e-11	6.6812e-11	-3.24511e-11	-1.52806e-10	-1.78082e-10	-5.16241e-11	1.56091e-10	-2.65904e-10	-2.17938e-10	5.15174e-11	-2.62756e-10	1.01394e-11	-6.97351e-10	-1.10912e-10	-3.3867e-10	2.26646e-10	-1.77091e-09	-1.18859e-10	-2.78582e-10	-5.60144e-10	-5.66005e-11	-1.32319e-10	1.05372e-08	2.02578e-09	-1.59572e-07	-1.63196e-06	-0.0044675
4.84774e-22	-5.4282e-20	1.53173e-15	-1.4036e-15	-1.61122e-15	3.34974e-16	1.65587e-14	-7.40019e-15	1.42464e-15	1.66904e-14	-6.62861e-15	4.65757e-16	2.71405e-14	7.97686e-13	-8.36583e-12	-2.88579e-11	1.94053e-11	-7.29655e-11	-9.50714e-11	-5.03718e-11	-2.72615e-11	-2.26368e-11	8.18587e-11	-2.61958e-11	3.996e-11	1.30266e-10	-3.81108e-11	-2.08527e-10	-1.44607e-10	1.19073e-10	-3.52968e-10	-1.27521e-10	2.55005e-11	-3.18833e-10	1.11411e-10	-8.90083e-10	-1.69474e-10	-5.11065e-10	3.33735e-10	-2.26485e-09	-2.25029e-10	-3.86825e-10	-3.95194e-10	-3.21324e-10	-1.81357e-10	1.55772e-08	3.16163e-09	-1.7438e-07	-2.04806e-06	-0.00446747
4.84774e-22	-5.42943e-20	1.52441e-15	-1.39137e-15	-1.60706e-15	3.29186e-16	1.6529e-14	-7.51619e-15	1.50115e-15	1.66749e-14	-6.64513e-15	4.71887e-16	2.62668e-14	-7.88466e-14	8.17249e-13	2.79879e-12	-1.75558e-12	7.90387e-12	1.35357e-11	8.88132e-12	1.03989e-11	-4.89026e-12	-2.00346e-11	2.02723e-12	-8.88035e-12	-2.04453e-11	1.35531e-11	5.43305e-11	5.30783e-11	-4.2043e-11	1.33252e-10	-2.43964e-12	-2.91303e-11	1.41833e-10	-7.98021e-12	2.78891e-10	9.85809e-11	1.93416e-10	-6.90012e-11	9.3248e-10	1.48351e-10	2.2427e-10	2.70238e-10	5.42218e-11	6.77449e-11	-3.99073e-09	-2.25257e-09	8.41643e-08	9.14231e-07	-0.00446748
4.84774e-22	-5.4282e-20	1.53173e-15	-1.4036e-15	-1.61122e-15	3.34974e-16	1.65587e-14	-7.40019e-15	1.42464e-15	1.66903e-14	-6.65354e-15	4.56327e-16	2.66921e-14	9.97639e-14	-1.87768e-12	-1.3065e-11	2.41694e-12	-2.17459e-11	-2.88716e-11	-1.69373e-11	1.0138e-11	-1.99012e-11	7.51216e-12	-1.93419e-11	1.50974e-12	2.1807e-11	2.91552e-11	-3.21124e-11	-4.91871e-11	-2.62314e-11	-8.55033e-12	-1.09779e-10	1.19681e-11	-4.26782e-11	-1.9579e-11	-1.48416e-10	-1.66527e-11	2.05732e-12	4.83959e-11	-1.66229e-10	5.44887e-11	7.02929e-11	-1.38632e-10	-5.14214e-12	-4.63505e-11	4.38606e-09	-7.35266e-11	-2.85037e-08	-3.3278e-07	-0.00446748
-1.84088e-20	1.30243e-18	-3.34438e-14	3.06749e-14	3.5517e-14	-7.25637e-15	-3.62273e-13	1.65495e-13	-3.04614e-14	-3.63075e-13	1.46232e-13	-8.37517e-15	-5.89514e-13	3.64216e-13	-1.87985e-12	-1.04732e-13	1.13901e-14	-8.44523e-12	-2.57372e-11	-8.47617e-12	-7.46345e-12	9.26854e-12	1.12404e-11	-1.30736e-11	7.38152e-12	2.50083e-11	-3.7393e-11	-6.90496e-11	-3.40943e-11	5.21726e-11	-9.47868e-11	-1.05681e-10	1.52134e-11	-1.02098e-10	6.26985e-13	-2.61738e-10	-3.50152e-11	-1.14038e-10	7.47698e-11	-6.19103e-10	-3.18442e-11	1.17467e-11	-2.21673e-10	-3.80929e-11	-8.2113e-11	4.95051e-09	8.52231e-10	-5.08722e-08	-6.85839e-07	0.0985331
-2.25868e-08	-1.40438e-06	0.0197072	0.0228	0.00604404	0.000774528	0.201966	0.107525	0.00248302	-0.0232683	0.050709	-0.0376548	0.03435	-0.120505	-0.431852	0.384213	0.677731	0.305536	-0.108648	-0.0669899	-0.0170684	-0.0473048	0.0249445	0.00346589	-0.00758338	0.0569679	0.0577697	-0.00934482	0.0451795	0.074448	-0.011085	0.0627351	-0.0307162	-0.00599657	0.0155894	0.0215026	-0.000195294	0.00406806	0.00469457	-0.00658376	0.000385872	0.00223232	0.00665233	-0.00557623	-0.00203821	0.000647836	-0.000114313	-5.98952e-06	-4.80378e-06	-3.28156e-12
3.34383e-09	-9.9408e-08	0.00124886	0.00172408	0.00133159	-0.00102159	-0.00223882	0.0137864	0.0785792	-0.0284254	-0.000362357	-0.00387252	-0.0292117	-0.0496178	-0.080032	-0.0405876	-0.130395	-0.167654	-0.454633	-0.224838	-0.248533	-0.162527	0.529803	0.0118294	0.179054	-0.0473149	0.429574	0.209049	0.00473193	-0.050695	0.0401012	0.18402	0.0187908	0.0366642	-0.0237037	-0.0497173	-0.0502696	0.0240764	-0.00932154	0.0386643	-0.00396434	-0.00375564	0.00290556	0.00122879	-9.48284e-05	-0.00247989	7.27465e-05	-3.70182e-06	1.03933e-08	2.76819e-11
-3.99465e-21	1.62713e-19	-3.45594e-15	3.17419e-15	3.6507e-15	-7.42853e-16	-3.73436e-14	1.70265e-14	-3.34911e-15	-3.77255e-14	1.51195e-14	-9.80653e-16	-5.9811e-14	3.72355e-14	-1.88872e-13	-5.16014e-14	-1.35175e-13	-1.29121e-13	2.01511e-12	-4.77963e-13	2.70427e-11	-5.12256e-12	-3.80725e-11	-1.25594e-11	-1.53333e-11	-2.2942e-11	1.66417e-11	3.72922e-11	2.21548e-11	-3.19741e-11	1.15534e-10	-1.30689e-10	-3.72584e-12	4.49076e-11	-7.34293e-11	1.50926e-10	6.53853e-11	1.46372e-10	-9.92216e-11	5.97942e-10	1.29356e-10	2.43837e-10	1.15356e-10	-1.69493e-12	-5.43918e-11	1.99853e-09	-2.45376e-09	4.1173e-08	4.12289e-07	0.0101558
-8.991e-09	-2.32611e-06	0.036403	0.0468703	0.0198522	-0.00493232	0.185228	0.00714132	0.0224226	-0.0535417	-0.0311951	-0.0299758	-0.321276	0.189671	0.0554424	0.0930232	-0.0278432	0.00669825	-0.00779806	-0.00151597	-0.0331795	0.0269016	-0.0161951	0.00389073	-0.0158361	-0.0453695	0.0112294	0.00167253	-0.00167922	0.00720089	-0.00212912	-0.00549081	0.00425021	0.000664143	-0.00168758	-0.000874896	-0.000793089	0.00111925	0.000604999	-0.000313324	-0.000157134	-0.000175226	-0.000280939	-0.000360828	-0.000141282	1.9384e-05	9.97861e-06	3.59266e-06	5.17394e-07	-0.00558342
1.84088e-20	-1.30214e-18	3.3437e-14	-3.07921e-14	-3.54786e-14	7.26274e-15	3.63674e-13	-1.6506e-13	3.1101e-14	3.64686e-13	-1.45882e-13	9.23491e-15	5.87436e-13	-3.56664e-13	1.82643e-12	3.57701e-13	1.07218e-12	3.03114e-12	4.67716e-12	1.04193e-11	1.7867e-11	-4.44083e-12	-3.41638e-11	-1.08197e-11	-1.55803e-12	-1.26582e-11	1.82692e-11	3.69895e-11	3.00866e-11	-3.83732e-11	1.31449e-10	-8.68233e-11	-1.24685e-11	8.1734e-11	-4.96114e-11	1.80581e-10	6.50296e-11	1.75836e-10	-5.84939e-11	7.36191e-10	1.51007e-10	9.41539e-11	1.13153e-10	6.19109e-11	1.05035e-11	3.22241e-10	-2.25202e-09	4.53261e-08	5.87168e-07	-0.0985331
-8.991e-09	-2.32611e-06	0.036403	0.0468703	0.0198522	-0.00493232	0.185228	0.00714132	0.0224226	-0.0535417	-0.0311951	-0.0299758	-0.321276	0.189671	0.0554424	0.0930232	-0.0278432	0.00669825	-0.00779806	-0.00151597	-0.0331795	0.0269016	-0.0161951	0.00389073	-0.0158361	-0.0453695	0.0112294	0.00167253	-0.00167922	0.00720089	-0.00212912	-0.00549081	0.00425021	0.000664143	-0.00168758	-0.000874896	-0.000793089	0.00111925	0.000604999	-0.000313324	-0.000157134	-0.000175225	-0.000280939	-0.000360828	-0.000141282	1.93795e-05	9.97915e-06	3.58179e-06	4.86524e-07	-0.00558343
-4.6136e-22	1.01675e-20	-2.94028e-16	2.66263e-16	3.08398e-16	-6.21086e-17	-3.13842e-15	1.4114e-15	-3.27028e-16	-3.1503e-15	1.27682e-15	-7.1647e-17	-5.09106e-15	3.38168e-15	-1.59944e-14	-2.94526e-15	-9.50056e-15	-2.64483e-14	-3.88847e-14	-1.83951e-13	-1.41984e-12	-6.06539e-13	-1.90076e-12	1.24913e-11	3.28279e-12	6.74479e-13	-1.45291e-12	2.55635e-11	2.43842e-11	8.67229e-12	1.06585e-11	7.46726e-11	-2.64268e-11	2.68522e-11	2.35341e-11	8.94119e-11	1.35813e-11	-1.26029e-11	-3.08165e-11	1.50259e-10	-3.94842e-11	-4.70649e-11	1.78961e-10	-7.36858e-11	-1.62906e-11	-1.93939e-10	-4.14131e-10	2.68206e-08	2.10088e-07	0.000856235
-4.6136e-22	1.01644e-20	-2.91556e-16	2.65148e-16	3.0729e-16	-6.19728e-17	-3.15439e-15	1.40089e-15	-3.23303e-16	-3.12825e-15	1.2651e-15	-6.79623e-17	-5.16555e-15	3.32232e-15	-1.5939e-14	-3.0208e-15	-9.36501e-15	-2.64165e-14	-5.77632e-14	3.30847e-14	7.08793e-13	4.47828e-13	2.42353e-12	-2.14072e-11	-9.77748e-12	-2.95344e-12	3.19685e-12	-1.27154e-11	3.67022e-11	-6.00112e-11	1.68389e-10	-8.28896e-11	-2.82849e-11	2.41043e-10	3.5236e-11	1.53437e-10	1.57457e-10	3.04439e-10	9.42075e-11	1.13214e-09	3.70463e-10	3.98494e-10	9.06331e-11	1.80742e-10	1.6396e-10	-4.5426e-09	-3.73686e-09	1.05834e-07	1.09782e-06	0.000856184
-4.6136e-22	1.01675e-20	-2.94028e-16	2.66263e-16	3.08398e-16	-6.21086e-17	-3.13842e-15	1.4114e-15	-3.27028e-16	-3.1503e-15	1.27682e-15	-7.1647e-17	-5.09106e-15	3.38168e-15	-1.59944e-14	-2.94514e-15	-9.49999e-15	-2.64883e-14	-5.33491e-14	-2.959e-14	-3.29803e-14	-3.13054e-14	-9.83373e-14	1.39359e-11	-6.23563e-13	-2.85795e-14	-4.69349e-13	7.47123e-13	-4.00652e-11	4.82834e-11	-1.00642e-10	6.76923e-11	2.71007e-11	-1.55692e-10	3.71344e-12	-9.64866e-11	-1.23747e-10	-2.01726e-10	-2.94959e-12	-7.41937e-10	-2.34572e-10	-3.49308e-10	-1.19365e-10	-5.13285e-11	-1.56931e-11	1.86124e-09	2.68565e-09	-7.70189e-08	-7.09094e-07	0.00085622
-4.6136e-22	1.01644e-20	-2.91556e-16	2.65148e-16	3.0729e-16	-6.19728e-17	-3.15439e-15	1.40089e-15	-3.23303e-16	-3.12825e-15	1.2651e-15	-6.79623e-17	-5.16555e-15	3.32232e-15	-1.5939e-14	-3.02082e-15	-9.36508e-15	-2.64092e-14	-5.3235e-14	-2.82326e-14	-9.61404e-15	-1.00442e-15	2.55707e-13	-1.29184e-11	-3.70164e-13	-4.00239e-13	2.59454e-12	-6.02676e-11	-1.775e-10	1.14067e-10	-3.16175e-10	-1.18861e-10	1.55221e-10	-4.28918e-10	-6.50306e-11	-7.01318e-10	-2.94656e-10	-4.54991e-10	1.3388e-10	-2.62279e-09	-3.91005e-10	-3.43883e-10	-1.05373e-09	8.34466e-11	-1.4289e-10	5.53294e-09	7.28714e-09	-2.8189e-07	-2.59761e-06	0.000856219
-4.6136e-22	1.01675e-20	-2.94028e-16	2.66263e-16	3.08398e-16	-6.21086e-17	-3.13842e-15	1.4114e-15	-3.27028e-16	-3.1503e-15	1.27682e-15	-7.1647e-17	-5.09106e-15	3.38168e-15	-1.59944e-14	-2.94514e-15	-9.49999e-15	-2.64884e-14	-5.33661e-14	-2.9211e-14	-2.53975e-14	-2.05084e-14	4.30621e-14	5.90337e-13	-4.85707e-14	-1.27153e-14	4.07623e-14	-4.08815e-12	-2.19167e-11	2.18001e-11	-7.96845e-11	-1.64858e-11	3.15508e-11	-9.70555e-11	-3.33186e-11	-1.43075e-10	-6.43626e-11	-8.58874e-11	2.38533e-12	-5.34656e-10	-9.07458e-11	-1.45574e-10	-2.45356e-10	4.04041e-11	-1.94534e-11	1.13827e-09	1.70135e-09	-6.47088e-08	-5.48705e-07	0.000856215
-3.59547e-23	2.54265e-21	-4.92932e-17	4.56055e-17	5.2005e-17	-1.05613e-17	-5.37892e-16	2.38356e-16	-4.33915e-17	-5.40368e-16	2.14728e-16	-1.46425e-17	-8.60884e-16	5.55096e-16	-2.72985e-15	-5.10397e-16	-1.61013e-15	-4.51311e-15	-9.0887e-15	-4.92644e-15	-4.41737e-15	-3.69503e-15	2.28772e-15	1.08299e-12	-1.31036e-13	-4.15176e-14	2.05417e-13	-7.59648e-12	-3.33435e-11	2.64462e-11	-5.75599e-11	8.45109e-12	2.49387e-11	-9.80569e-11	-1.26753e-11	-1.14269e-10	-7.358e-11	-1.05335e-10	1.69395e-11	-5.31555e-10	-1.09487e-10	-1.64891e-10	-1.9639e-10	3.24382e-12	-1.76532e-11	2.04457e-09	1.43242e-09	-5.90481e-08	-5.38796e-07	0.000145852
2.15212e-08	2.02423e-06	-0.0273892	-0.0325864	-0.0119625	0.00106108	-0.199481	-0.0239232	0.031729	0.0580178	-0.0154971	0.0495619	-0.12254	0.0176812	-0.028616	-0.00153174	0.0574972	0.0581799	0.0102553	-0.0525947	-0.000961058	0.0358282	-0.0374338	0.0135433	-0.0852847	0.0831887	0.146056	0.250798	0.17084	-0.0944667	-0.307296	-0.370056	0.0786364	-0.0330411	-0.0490149	-0.134261	0.056806	0.0861248	-0.123482	0.00125317	0.012227	-0.0120636	-0.0139557	0.00227777	-0.00508029	-0.000843593	0.00039799	7.45795e-05	1.88123e-07	-1.14069e-11
2.15212e-08	2.02423e-06	-0.0273892	-0.0325864	-0.0119625	0.00106108	-0.199481	-0.0239232	0.031729	0.0580178	-0.0154971	0.0495619	-0.12254	0.0176812	-0.028616	-0.00153174	0.0574972	0.0581799	0.0102553	-0.0525947	-0.000961058	0.0358282	-0.0374338	0.0135433	-0.0852847	0.0831887	0.146056	0.250798	0.17084	-0.0944667	-0.307296	-0.370056	0.0786364	-0.0330411	-0.0490149	-0.134261	0.056806	0.0861248	-0.123482	0.00125317	0.012227	-0.0120636	-0.0139557	0.00227777	-0.00508029	-0.000843593	0.00039799	7.45795e-05	1.88026e-07	-1.15211e-11
-2.14595e-08	-2.03203e-06	0.0274455	0.0325325	0.0116273	-0.000916983	0.202926	0.0241738	-0.0301144	-0.0552795	0.0154213	-0.0479004	0.115394	-0.0333849	0.031593	-0.0208279	-0.0204156	-0.0448899	-0.0399673	0.0585946	-0.0389701	-0.0118065	0.0741955	-0.00934235	0.0283682	-0.0125608	-0.0973682	-0.0493466	-0.0303906	0.0466493	-0.039566	-0.049761	-0.0587468	-0.00605849	-0.258407	-0.065759	0.232282	0.0864445	-0.359406	-0.112716	0.187858	-0.0838426	0.0514875	0.0735846	-0.0861882	-0.213698	-0.719539	-0.00940469	0.000854652	1.9366e-10
1.9305e-08	1.7698e-06	-0.022824	-0.0259551	-0.00771891	-0.000164114	-0.165962	0.123184	-0.0827628	-0.184836	0.134382	-0.0336094	-0.0699805	-0.158647	0.0100896	-0.0171826	-0.00914202	0.0630745	-0.110919	-0.086122	-0.471816	-0.00969446	-0.448914	-0.045066	0.386412	-0.434393	-0.12804	0.0608609	0.228273	0.0067555	0.0312148	0.00320464	-0.0290618	-0.0281509	-0.0267108	-0.00338575	0.0077895	-0.0261523	-0.027991	-0.00219754	-0.0099368	-0.00817985	0.00355671	-4.02908e-05	0.000271166	0.000217714	5.56695e-05	5.64212e-06	1.05841e-06	1.02675e-11
2.12537e-10	3.07993e-09	0.000165587	0.000239643	0.000157096	-0.000116853	0.000208756	0.00212533	0.01033	-0.00242357	0.000172685	-0.000758011	0.00584869	0.0395233	0.0750395	0.0260839	0.0650065	0.089089	0.219976	0.130161	0.0263644	0.000197899	0.141786	-0.0290805	0.380232	0.00592714	0.0172069	0.0324905	-0.119876	-0.0586114	-0.0234886	0.00413568	-0.0481161	0.0618597	-0.0412863	-0.146619	0.0534541	0.0779566	-0.106977	0.0541352	-0.0997505	0.73422	-0.34988	0.0233814	-0.0619106	-0.00112422	-0.00453645	0.000119656	-8.10668e-06	-4.98259e-10
-1.48308e-11	1.63816e-09	-0.000184791	-0.000243307	-0.000142435	5.08349e-05	-0.000149773	0.00109457	-0.000246872	0.00150093	0.000449502	-1.94839e-06	-0.00147157	-0.000405306	0.000158029	0.00082805	-0.00152358	-0.00353148	0.00217825	0.00117428	0.0014109	-0.00454877	0.000821974	0.000630832	-0.00599281	-0.00310988	-0.00309879	0.0092533	0.0032224	-0.0228396	-0.00394992	-0.000223664	-0.0126095	-0.00747271	0.0186402	-0.0169983	0.0220294	-0.0164078	-0.0130751	0.00466389	-0.00283085	0.183935	0.384428	-0.12447	0.0112958	-0.0146873	0.000681396	0.000278367	-4.70462e-05	1.19903e-10
2.97494e-33	3.11134e-31	9.69436e-28	1.00169e-27	7.06764e-28	-3.78513e-28	-5.9926e-28	6.43374e-27	-3.47979e-27	2.25753e-27	3.41074e-27	7.36413e-27	-5.40398e-26	-4.63465e-26	-4.63225e-26	2.11311e-26	1.85798e-25	1.87573e-25	-3.842e-26	-3.19406e-26	6.36312e-26	-2.1305e-26	-4.06033e-28	1.94056e-26	-1.84951e-25	-1.46338e-25	1.29159e-25	2.48336e-25	2.30207e-25	-2.46683e-24	1.36922e-22	8.30595e-21	8.37957e-20	5.87572e-18	-3.11707e-17	-2.32812e-17	9.91787e-17	-6.43492e-17	-1.2188e-18	-3.19658e-16	-2.23352e-17	8.98775e-18	1.35491e-16	7.54067e-16	2.6737e-16	-9.63817e-15	-5.08101e-15	-1.12971e-13	6.62585e-14	-9.54119e-16
-1.2333e-32	-1.6902e-31	4.99646e-28	-5.57814e-28	-4.72244e-29	6.02325e-28	-3.80771e-28	1.58167e-28	1.19424e-28	-8.88438e-30	5.1662e-28	1.22253e-27	-1.2682e-27	1.17653e-27	-1.57758e-28	-3.08922e-28	-6.22404e-28	2.25586e-27	-5.91633e-27	7.67497e-27	-1.31804e-27	-5.30697e-27	-3.30788e-27	-4.55719e-26	3.1117e-27	-1.88645e-27	4.98672e-27	-2.6563e-27	3.33198e-26	-7.07386e-26	8.13737e-24	8.39371e-22	9.81416e-21	1.81041e-18	-1.1855e-17	-1.3589e-17	-3.53735e-18	-4.24163e-17	1.98642e-17	2.70203e-17	-8.14041e-18	-9.16543e-17	-3.18767e-16	-5.3715e-16	-6.08189e-17	3.24614e-15	-7.42803e-15	-1.13399e-14	-8.26409e-13	-8.54679e-16
-1.48326e-25	3.97586e-23	-1.42454e-18	1.30069e-18	1.49324e-18	-3.06116e-19	-1.51939e-17	6.93063e-18	-1.52374e-18	-1.54002e-17	6.18592e-18	-3.97357e-19	-2.44091e-17	1.4987e-17	-7.66217e-17	-1.5668e-17	-4.49287e-17	-1.27682e-16	-2.56608e-16	-1.40155e-16	-1.23464e-16	-9.86209e-17	2.24806e-16	-2.03969e-17	9.24907e-17	3.98821e-17	-2.69008e-16	-3.88509e-16	-1.54162e-16	3.51423e-16	-3.38102e-16	-4.16976e-16	-1.04213e-16	-2.95039e-16	1.82139e-16	-5.48785e-16	3.44348e-16	-4.1494e-16	3.75463e-16	-1.96395e-15	1.20696e-16	2.02493e-15	-2.3065e-15	1.17561e-15	1.38948e-15	1.22138e-14	-1.4624e-14	3.1924e-13	-1.40524e-12	4.13593e-06
0.408248	2.50985e-05	-0.198412	0.11379	0.012186	-0.175577	0.0208618	-0.14255	0.0368626	0.0479238	0.235905	-0.0553951	-0.0148013	0.00333042	0.000703261	0.000150505	0.00121578	-0.000826101	7.67254e-05	0.000415637	0.00165958	0.00149926	0.00140551	0.00015775	-0.00142939	0.000597086	0.0010097	-0.000441931	-0.000616142	0.000714343	-5.98315e-05	0.000196954	-0.000186077	0.00012685	9.4993e-05	-5.8181e-05	-8.92698e-05	4.63071e-05	9.45364e-05	-5.45444e-06	6.37868e-05	8.67506e-06	-2.92173e-05	-8.34809e-06	-5.59923e-06	1.4392e-06	1.71331e-06	6.64392e-08	-2.03658e-06	-3.89749e-09
2.08101e-08	2.06965e-06	-0.0284239	-0.0339755	-0.0124908	0.00124649	-0.203932	-0.0237366	0.0321772	0.0526545	-0.0162869	0.0472512	-0.109801	0.0197999	-0.0169833	0.035035	-0.0153126	0.00466473	0.0601074	-0.058796	0.0490356	0.0507338	-0.111205	0.00640154	-0.00598689	0.0429568	0.223997	-0.0798044	-0.0142422	0.296285	0.0329369	0.163323	-0.208586	0.0285876	-0.0368604	-0.0524969	0.0918362	0.0140867	-0.100745	-0.0185984	0.0466258	-0.00422695	0.00890553	-0.00290246	-0.00776833	0.000394862	0.000768323	-2.5041e-05	-2.46967e-06	2.16203e-12
2.08101e-08	2.06965e-06	-0.0284239	-0.0339755	-0.0124908	0.00124649	-0.203932	-0.0237366	0.0321772	0.0526545	-0.0162869	0.0472512	-0.109801	0.0197999	-0.0169833	0.035035	-0.0153126	0.00466473	0.0601074	-0.058796	0.0490356	0.0507338	-0.111205	0.00640154	-0.00598689	0.0429568	0.223997	-0.0798044	-0.0142422	0.296285	0.0329369	0.163323	-0.208586	0.0285876	-0.0368604	-0.0524969	0.0918362	0.0140867	-0.100745	-0.0185984	0.0466258	-0.00422695	0.00890553	-0.00290246	-0.00776833	0.000394862	0.000768323	-2.5041e-05	-2.4697e-06	1.9192e-12
2.08101e-08	2.06965e-06	-0.0284239	-0.0339755	-0.0124908	0.00124649	-0.203932	-0.0237366	0.0321772	0.0526545	-0.0162869	0.0472512	-0.109801	0.0197999	-0.0169833	0.035035	-0.0153126	0.00466473	0.0601074	-0.058796	0.0490356	0.0507338	-0.111205	0.00640154	-0.00598689	0.0429568	0.223997	-0.0798044	-0.0142422	0.296285	0.0329369	0.163323	-0.208586	0.0285876	-0.0368604	-0.0524969	0.0918362	0.0140867	-0.100745	-0.0185984	0.0466258	-0.00422695	0.00890553	-0.00290246	-0.00776833	0.000394862	0.000768323	-2.5041e-05	-2.46969e-06	2.39587e-12
5.97557e-10	-3.46123e-09	0.000282305	0.000394888	0.000308029	-0.00021665	-0.000521582	0.00310691	0.0167887	-0.00585201	3.05836e-07	-0.000657826	-0.00602982	-0.0116409	-0.0174205	-0.00523965	-0.0189303	-0.0281999	-0.0873686	-0.0437011	-0.0428257	-0.028252	0.0769156	-0.00111584	0.0155093	-0.00382971	-0.0681385	-0.13215	-0.050037	0.1272	-0.0531442	-0.175282	-0.0399262	-0.0876674	0.0419713	0.06224	0.134598	-0.0641948	0.0261878	-0.148003	-0.0189246	0.040798	-0.0458918	-0.0289857	0.0453602	-0.392274	0.176501	0.391701	-0.0100122	-3.55557e-09
6.18194e-10	-3.88253e-09	0.000292418	0.000408425	0.000319235	-0.000224299	-0.000540799	0.00321394	0.0173496	-0.00604105	-3.10402e-06	-0.000683469	-0.00629994	-0.0120203	-0.0178943	-0.00558764	-0.0199894	-0.029476	-0.0904324	-0.0451375	-0.0444238	-0.0293024	0.0800495	-0.00113998	0.0166323	-0.0038514	-0.0695035	-0.134976	-0.0525495	0.127678	-0.0557639	-0.180113	-0.0431983	-0.0914806	0.0454782	0.0508747	0.134664	-0.0706187	0.0293254	-0.161662	-0.0171859	0.0507287	-0.026544	-0.0478654	0.0423191	0.397937	-0.0524278	-0.0020917	-0.000178448	-2.92299e-09
2.18091e-08	2.03624e-06	-0.0262818	-0.0307967	-0.0103861	0.000510382	-0.204594	-0.0301506	0.027442	0.0495757	-0.0157613	0.0482341	-0.108663	0.0659375	-0.0599651	0.0202555	0.0471201	0.0582716	0.0388449	-0.0398846	-0.00282787	-0.0262409	-0.0228705	0.0115416	-0.0395116	-0.0401211	0.0254999	0.104344	-0.105291	-0.378653	0.144825	0.114189	0.0927399	0.318369	0.0454199	0.511576	0.569441	0.0204355	-0.0309461	-0.121942	0.032606	0.000309803	-0.0241813	0.000123333	-0.0173907	0.00955989	0.000310843	3.05348e-05	9.11654e-07	5.9935e-11
-1.18168e-23	2.12122e-22	-1.35951e-17	1.25124e-17	1.43269e-17	-2.93436e-18	-1.46655e-16	6.65915e-17	-1.24008e-17	-1.49011e-16	5.90562e-17	-4.16432e-18	-2.3285e-16	1.47168e-16	-7.45008e-16	-1.41645e-16	-4.37756e-16	-1.23485e-15	-2.48167e-15	-1.37034e-15	-1.19189e-15	-9.46309e-16	2.17417e-15	-2.07055e-16	8.76326e-16	3.92458e-16	-2.64165e-15	-3.85319e-15	-1.532e-15	3.40909e-15	-3.4037e-15	-4.10241e-15	-9.7028e-16	-3.05118e-15	1.87106e-15	-5.42596e-15	2.33431e-15	-3.82977e-15	3.81398e-15	-1.72259e-14	6.26069e-16	2.24071e-14	-1.70324e-14	5.81556e-15	3.68208e-15	1.39291e-13	-7.30053e-14	3.52081e-13	-1.66533e-11	4.00088e-05
8.17661e-22	-6.77893e-20	1.11933e-15	-1.02719e-15	-1.17033e-15	2.43884e-16	1.21042e-14	-5.3784e-15	1.18825e-15	1.2167e-14	-4.84987e-15	3.13973e-16	1.92943e-14	-1.2585e-14	6.13601e-14	1.1426e-14	3.59496e-14	1.01523e-13	2.04955e-13	1.12152e-13	9.67584e-14	7.79663e-14	-1.76682e-13	1.68365e-14	-7.234e-14	-3.17775e-14	2.17365e-13	3.14933e-13	1.25241e-13	-2.84842e-13	2.82921e-13	3.40104e-13	7.92889e-14	2.59544e-13	-1.48808e-13	4.43127e-13	-1.88655e-13	3.21206e-13	-3.03598e-13	1.4314e-12	-4.02653e-14	-1.8115e-12	1.39427e-12	-4.71083e-13	-3.00426e-13	-1.1704e-11	5.82907e-12	-2.64561e-11	1.4095e-09	-0.00328444
-3.10255e-20	3.47205e-18	-7.15169e-14	6.52331e-14	7.48968e-14	-1.54199e-14	-7.77466e-13	3.47534e-13	-8.09384e-14	-7.79998e-13	3.11027e-13	-2.07698e-14	-1.22879e-12	7.69077e-13	-3.88569e-12	-7.62724e-13	-2.27916e-12	-6.4247e-12	-1.29342e-11	-7.06108e-12	-6.19759e-12	-4.95239e-12	1.1294e-11	-1.09789e-12	4.57692e-12	2.04398e-12	-1.35141e-11	-1.97457e-11	-7.89092e-12	1.79165e-11	-1.71433e-11	-2.19828e-11	-5.05777e-12	-1.58449e-11	9.41355e-12	-2.68821e-11	1.23897e-11	-1.88291e-11	1.93794e-11	-8.60349e-11	3.73588e-12	1.17049e-10	-8.90625e-11	3.16743e-11	2.02242e-11	7.01799e-10	-3.80934e-10	1.94229e-09	-8.57086e-08	0.208821
4.84017e-20	-8.68852e-19	5.56633e-14	-5.11955e-14	-5.88926e-14	1.22273e-14	6.00075e-13	-2.71828e-13	4.8339e-14	6.06467e-13	-2.41685e-13	1.53697e-14	9.70157e-13	-5.95974e-13	3.0363e-12	5.98663e-13	1.77036e-12	5.05312e-12	1.01794e-11	5.56976e-12	4.85474e-12	3.88131e-12	-8.84604e-12	8.42819e-13	-3.58028e-12	-1.60684e-12	1.07642e-11	1.56658e-11	6.24839e-12	-1.39658e-11	1.40856e-11	1.68011e-11	3.92464e-12	1.27648e-11	-7.56803e-12	2.23401e-11	-9.22479e-12	1.58779e-11	-1.54293e-11	7.10043e-11	-2.24715e-12	-9.10479e-11	6.94616e-11	-2.3652e-11	-1.52254e-11	-5.76141e-10	2.97036e-10	-1.39195e-09	6.92306e-08	-0.163876
5.81224e-20	-3.47158e-18	7.08079e-14	-6.45009e-14	-7.47714e-14	1.51637e-14	7.57105e-13	-3.46967e-13	7.33239e-14	7.60116e-13	-3.0829e-13	1.70293e-14	1.24808e-12	-7.43409e-13	3.79851e-12	7.69748e-13	2.2252e-12	6.3629e-12	1.28534e-11	7.02423e-12	6.15175e-12	4.89502e-12	-1.11951e-11	1.09889e-12	-4.53258e-12	-1.97859e-12	1.34602e-11	1.98529e-11	7.79537e-12	-1.75856e-11	1.75868e-11	2.13179e-11	4.91354e-12	1.58142e-11	-9.61051e-12	2.81405e-11	-1.17697e-11	1.98953e-11	-1.97334e-11	8.88245e-11	-3.2957e-12	-1.14514e-10	8.77493e-11	-3.04808e-11	-1.90257e-11	-7.24376e-10	3.7346e-10	-1.82514e-09	8.70402e-08	-0.206228
-1.68488e-09	3.63931e-07	-0.0190067	-0.0251955	-0.0145197	0.00442447	-0.0216413	0.120332	0.0426555	0.114904	0.0318698	-0.0014372	-0.136707	-0.103056	-0.065267	-0.226794	0.354632	-0.439768	0.27057	0.1548	0.0715391	0.0300014	0.214905	0.0321419	-0.191531	-0.600372	0.056012	0.02519	-0.00541524	0.0895544	-0.0306469	-0.0273632	0.00383241	0.000729933	-0.0132132	0.0151251	-0.0162286	0.0369604	0.0212022	-0.00651853	-0.000225876	0.000251749	-0.00373772	0.00213386	0.00392411	0.000816521	-5.54856e-05	-2.61847e-07	3.11262e-06	5.27347e-12
-5.3262e-21	2.16994e-19	-8.18384e-15	7.48256e-15	8.62312e-15	-1.79423e-15	-8.93155e-14	3.94095e-14	-9.14182e-15	-8.94516e-14	3.53904e-14	-2.54151e-15	-1.4094e-13	9.03134e-14	-4.49724e-13	-8.90747e-14	-2.65855e-13	-7.37767e-13	-1.47903e-12	-8.09885e-13	-7.12628e-13	-5.71406e-13	1.29711e-12	-1.22274e-13	5.27896e-13	2.06744e-13	-1.53835e-12	-2.25825e-12	-9.09988e-13	2.01785e-12	-1.97014e-12	-2.45876e-12	-5.79927e-13	-1.7783e-12	1.08002e-12	-3.06263e-12	1.42866e-12	-2.16384e-12	2.21496e-12	-9.8437e-12	4.31422e-13	1.34522e-11	-1.02675e-11	3.65725e-12	2.26929e-12	7.90281e-11	-4.36129e-11	2.41116e-10	-9.76729e-09	0.0240282
-8.991e-09	-2.32611e-06	0.036403	0.0468703	0.0198522	-0.00493232	0.185228	0.00714132	0.0224226	-0.0535417	-0.0311951	-0.0299758	-0.321276	0.189671	0.0554424	0.0930232	-0.0278432	0.00669825	-0.00779806	-0.00151597	-0.0331795	0.0269016	-0.0161951	0.00389073	-0.0158361	-0.0453695	0.0112294	0.00167253	-0.00167922	0.00720089	-0.00212912	-0.00549081	0.00425021	0.000664143	-0.00168758	-0.000874896	-0.000793089	0.00111925	0.000604999	-0.000313325	-0.000157134	-0.000175226	-0.00028094	-0.000360828	-0.000141282	1.93843e-05	9.98068e-06	3.48881e-06	-3.49346e-07	-0.00558344
0	0	0	0	0	0	0	0	0	0	0	0	0	0	0	0	0	0	0	0	0	0	0	0	0	0	0	0	0	0	0	0	0	0	0	0	0	0	0	0	0	0	0	0	0	0	0	0	0	0
5.81224e-20	-3.47158e-18	7.0491e-14	-6.41291e-14	-7.48872e-14	1.55257e-14	7.6115e-13	-3.48246e-13	7.53906e-14	7.60759e-13	-3.08648e-13	1.73169e-14	1.24166e-12	-7.39952e-13	3.80081e-12	7.59286e-13	2.23568e-12	6.35097e-12	1.28402e-11	6.99976e-12	6.15427e-12	4.8922e-12	-1.11758e-11	1.073e-12	-4.52122e-12	-1.94883e-12	1.34595e-11	1.97689e-11	7.92192e-12	-1.76735e-11	1.74548e-11	2.1173e-11	4.95862e-12	1.57245e-11	-9.54914e-12	2.7616e-11	-1.20196e-11	1.97241e-11	-1.94617e-11	8.83769e-11	-3.29108e-12	-1.14398e-10	8.78168e-11	-3.06499e-11	-1.91277e-11	-7.16477e-10	3.76584e-10	-1.83896e-09	8.67845e-08	-0.206228
-5.3262e-21	2.16994e-19	-8.18384e-15	7.48256e-15	8.62312e-15	-1.79423e-15	-8.93155e-14	3.94095e-14	-9.14182e-15	-8.94516e-14	3.53904e-14	-2.54151e-15	-1.4094e-13	9.03134e-14	-4.49724e-13	-8.90747e-14	-2.65855e-13	-7.37767e-13	-1.47903e-12	-8.09885e-13	-7.12628e-13	-5.71406e-13	1.29711e-12	-1.22274e-13	5.27896e-13	2.06744e-13	-1.53835e-12	-2.25825e-12	-9.09988e-13	2.01785e-12	-1.97014e-12	-2.45876e-12	-5.79927e-13	-1.7783e-12	1.08002e-12	-3.06263e-12	1.42866e-12	-2.16384e-12	2.21496e-12	-9.8437e-12	4.31422e-13	1.34522e-11	-1.02675e-11	3.65725e-12	2.26929e-12	7.90281e-11	-4.36129e-11	2.41116e-10	-9.76729e-09	0.0240282
4.84017e-20	-8.68852e-19	5.56633e-14	-5.11955e-14	-5.88926e-14	1.22273e-14	6.00075e-13	-2.71828e-13	4.8339e-14	6.06467e-13	-2.41685e-13	1.53697e-14	9.70157e-13	-5.95974e-13	3.0363e-12	5.98663e-13	1.77036e-12	5.05312e-12	1.01794e-11	5.56976e-12	4.85474e-12	3.88131e-12	-8.84604e-12	8.42819e-13	-3.58028e-12	-1.60684e-12	1.07642e-11	1.56658e-11	6.24839e-12	-1.39658e-11	1.40856e-11	1.68011e-11	3.92464e-12	1.27648e-11	-7.56803e-12	2.23401e-11	-9.22479e-12	1.58779e-11	-1.54293e-11	7.10043e-11	-2.24715e-12	-9.10479e-11	6.94616e-11	-2.3652e-11	-1.52254e-11	-5.76141e-10	2.97036e-10	-1.39195e-09	6.92306e-08	-0.163876
1.21193e-22	-1.3565e-20	3.50095e-16	-3.19428e-16	-3.71542e-16	7.52875e-17	3.8296e-15	-1.70999e-15	3.79297e-16	3.80055e-15	-1.52747e-15	8.39829e-17	6.16747e-15	-3.96114e-15	1.93978e-14	3.5012e-15	1.15161e-14	3.1961e-14	6.45861e-14	3.52379e-14	3.09028e-14	2.45871e-14	-5.66251e-14	5.41141e-15	-2.31604e-14	-9.73984e-15	6.90295e-14	9.96816e-14	3.80639e-14	-8.93762e-14	8.37359e-14	1.07922e-13	2.62315e-14	7.65512e-14	-4.85208e-14	1.3429e-13	-6.16835e-14	9.503e-14	-9.84655e-14	4.18258e-13	-2.11177e-14	-5.79747e-13	4.32159e-13	-1.53967e-13	-9.73528e-14	-3.62335e-12	1.95214e-12	-1.17534e-11	4.12754e-10	-0.00103854
-6.05967e-23	6.78394e-21	-2.06675e-16	1.89298e-16	2.16228e-16	-4.43256e-17	-2.20944e-15	9.98055e-16	-2.14342e-16	-2.25234e-15	8.9836e-16	-6.64951e-17	-3.5081e-15	2.22176e-15	-1.11758e-14	-2.16881e-15	-6.52947e-15	-1.85637e-14	-3.72649e-14	-2.04382e-14	-1.78214e-14	-1.41309e-14	3.23985e-14	-2.9467e-15	1.30984e-14	5.75744e-15	-3.92637e-14	-5.7196e-14	-2.21693e-14	5.07614e-14	-4.9931e-14	-6.09399e-14	-1.52751e-14	-4.43046e-14	2.791e-14	-7.72078e-14	3.62315e-14	-5.62812e-14	5.54221e-14	-2.47089e-13	1.03212e-14	3.35192e-13	-2.49693e-13	8.78047e-14	5.53746e-14	2.07359e-12	-1.13606e-12	6.67119e-12	-2.40841e-10	0.000600976
-6.05967e-23	6.78547e-21	-2.06607e-16	1.88656e-16	2.15507e-16	-4.42794e-17	-2.2077e-15	1.00037e-15	-2.11407e-16	-2.24362e-15	8.96593e-16	-6.23937e-17	-3.52622e-15	2.24965e-15	-1.12029e-14	-2.20157e-15	-6.59407e-15	-1.85223e-14	-3.71992e-14	-2.0308e-14	-1.77644e-14	-1.43942e-14	3.23674e-14	-2.90527e-15	1.31988e-14	5.52951e-15	-3.91977e-14	-5.68854e-14	-2.22756e-14	5.08356e-14	-5.06171e-14	-6.08251e-14	-1.4639e-14	-4.54715e-14	2.75801e-14	-7.8055e-14	3.43549e-14	-5.66207e-14	5.58675e-14	-2.51023e-13	8.93789e-15	3.32121e-13	-2.54927e-13	8.99102e-14	5.59693e-14	2.04139e-12	-1.08298e-12	5.96195e-12	-2.47216e-10	0.000600976
-6.05967e-23	6.78394e-21	-2.06675e-16	1.89298e-16	2.16228e-16	-4.43256e-17	-2.20944e-15	9.98055e-16	-2.14342e-16	-2.25234e-15	8.9836e-16	-6.64951e-17	-3.5081e-15	2.22176e-15	-1.11758e-14	-2.16881e-15	-6.52947e-15	-1.85637e-14	-3.72649e-14	-2.04382e-14	-1.78214e-14	-1.41309e-14	3.23985e-14	-2.9467e-15	1.30984e-14	5.75744e-15	-3.92637e-14	-5.7196e-14	-2.21693e-14	5.07614e-14	-4.9931e-14	-6.09399e-14	-1.52751e-14	-4.43046e-14	2.791e-14	-7.72078e-14	3.62315e-14	-5.62812e-14	5.54221e-14	-2.47089e-13	1.03212e-14	3.35192e-13	-2.49693e-13	8.78047e-14	5.53746e-14	2.07359e-12	-1.13606e-12	6.67119e-12	-2.40841e-10	0.000600976
-6.05967e-23	6.78547e-21	-2.06607e-16	1.88656e-16	2.15507e-16	-4.42794e-17	-2.2077e-15	1.00037e-15	-2.11407e-16	-2.24362e-15	8.96593e-16	-6.23937e-17	-3.52622e-15	2.24965e-15	-1.12029e-14	-2.20157e-15	-6.59407e-15	-1.85223e-14	-3.71992e-14	-2.0308e-14	-1.77644e-14	-1.43942e-14	3.23674e-14	-2.90527e-15	1.31988e-14	5.52951e-15	-3.91977e-14	-5.68854e-14	-2.22756e-14	5.08356e-14	-5.06171e-14	-6.08251e-14	-1.4639e-14	-4.54715e-14	2.75801e-14	-7.8055e-14	3.43549e-14	-5.66207e-14	5.58675e-14	-2.51023e-13	8.93789e-15	3.32121e-13	-2.54927e-13	8.99102e-14	5.59693e-14	2.04139e-12	-1.08298e-12	5.96195e-12	-2.47216e-10	0.000600976
-6.05967e-23	6.78394e-21	-2.06675e-16	1.89298e-16	2.16228e-16	-4.43256e-17	-2.20944e-15	9.98055e-16	-2.14342e-16	-2.25234e-15	8.9836e-16	-6.64951e-17	-3.5081e-15	2.22176e-15	-1.11758e-14	-2.16881e-15	-6.52947e-15	-1.85637e-14	-3.72649e-14	-2.04382e-14	-1.78214e-14	-1.41309e-14	3.23985e-14	-2.9467e-15	1.30984e-14	5.75744e-15	-3.92637e-14	-5.7196e-14	-2.21693e-14	5.07614e-14	-4.9931e-14	-6.09399e-14	-1.52751e-14	-4.43046e-14	2.791e-14	-7.72078e-14	3.62315e-14	-5.62812e-14	5.54221e-14	-2.47089e-13	1.03212e-14	3.35192e-13	-2.49693e-13	8.78047e-14	5.53746e-14	2.07359e-12	-1.13606e-12	6.67119e-12	-2.40841e-10	0.000600976
-6.05967e-23	6.78547e-21	-2.06607e-16	1.88656e-16	2.15507e-16	-4.42794e-17	-2.2077e-15	1.00037e-15	-2.11407e-16	-2.24362e-15	8.96593e-16	-6.23937e-17	-3.52622e-15	2.24965e-15	-1.12029e-14	-2.20157e-15	-6.59407e-15	-1.85223e-14	-3.71992e-14	-2.0308e-14	-1.77644e-14	-1.43942e-14	3.23674e-14	-2.90527e-15	1.31988e-14	5.52951e-15	-3.91977e-14	-5.68854e-14	-2.22756e-14	5.08356e-14	-5.06171e-14	-6.08251e-14	-1.4639e-14	-4.54715e-14	2.75801e-14	-7.8055e-14	3.43549e-14	-5.66207e-14	5.58675e-14	-2.51023e-13	8.93789e-15	3.32121e-13	-2.54927e-13	8.99102e-14	5.59693e-14	2.04139e-12	-1.08298e-12	5.96195e-12	-2.47216e-10	0.000600976
-6.05967e-23	6.78394e-21	-2.06675e-16	1.89298e-16	2.16228e-16	-4.43256e-17	-2.20944e-15	9.98055e-16	-2.14342e-16	-2.25234e-15	8.9836e-16	-6.64951e-17	-3.5081e-15	2.22176e-15	-1.11758e-14	-2.16881e-15	-6.52947e-15	-1.85637e-14	-3.72649e-14	-2.04382e-14	-1.78214e-14	-1.41309e-14	3.23985e-14	-2.9467e-15	1.30984e-14	5.75744e-15	-3.92637e-14	-5.7196e-14	-2.21693e-14	5.07614e-14	-4.9931e-14	-6.09399e-14	-1.52751e-14	-4.43046e-14	2.791e-14	-7.72078e-14	3.62315e-14	-5.62812e-14	5.54221e-14	-2.47089e-13	1.03212e-14	3.35192e-13	-2.49693e-13	8.78047e-14	5.53746e-14	2.07359e-12	-1.13606e-12	6.67119e-12	-2.40841e-10	0.000600976
-6.05967e-23	6.78547e-21	-2.06607e-16	1.88656e-16	2.15507e-16	-4.42794e-17	-2.2077e-15	1.00037e-15	-2.11407e-16	-2.24362e-15	8.96593e-16	-6.23937e-17	-3.52622e-15	2.24965e-15	-1.12029e-14	-2.20157e-15	-6.59407e-15	-1.85223e-14	-3.71992e-14	-2.0308e-14	-1.77644e-14	-1.43942e-14	3.23674e-14	-2.90527e-15	1.31988e-14	5.52951e-15	-3.91977e-14	-5.68854e-14	-2.22756e-14	5.08356e-14	-5.06171e-14	-6.08251e-14	-1.4639e-14	-4.54715e-14	2.75801e-14	-7.8055e-14	3.43549e-14	-5.66207e-14	5.58675e-14	-2.51023e-13	8.93789e-15	3.32121e-13	-2.54927e-13	8.99102e-14	5.59693e-14	2.04139e-12	-1.08298e-12	5.96195e-12	-2.47216e-10	0.000600976
-6.05967e-23	6.78394e-21	-2.06675e-16	1.89298e-16	2.16228e-16	-4.43256e-17	-2.20944e-15	9.98055e-16	-2.14342e-16	-2.25234e-15	8.9836e-16	-6.64951e-17	-3.5081e-15	2.22176e-15	-1.11758e-14	-2.16881e-15	-6.52947e-15	-1.85637e-14	-3.72649e-14	-2.04382e-14	-1.78214e-14	-1.41309e-14	3.23985e-14	-2.9467e-15	1.30984e-14	5.75744e-15	-3.92637e-14	-5.7196e-14	-2.21693e-14	5.07614e-14	-4.9931e-14	-6.09399e-14	-1.52751e-14	-4.43046e-14	2.791e-14	-7.72078e-14	3.62315e-14	-5.62812e-14	5.54221e-14	-2.47089e-13	1.03212e-14	3.35192e-13	-2.49693e-13	8.78047e-14	5.53746e-14	2.07359e-12	-1.13606e-12	6.67119e-12	-2.40841e-10	0.000600976
2.14656e-08	2.0316e-06	-0.0274336	-0.0325145	-0.0116142	0.000911826	-0.202941	-0.0241818	0.0301465	0.0552638	-0.0154195	0.047895	-0.115355	0.0334747	-0.0317079	0.0208783	0.0202408	0.0449109	0.0399628	-0.0586224	0.0390597	0.0117113	-0.0742194	0.00930129	-0.0282861	0.0122303	0.0978005	0.0478576	0.0306883	-0.0462614	0.0401888	0.0498151	0.0595564	0.00518174	0.259645	0.065232	-0.229245	-0.0842543	0.357081	0.107393	-0.182499	0.0768823	-0.0468065	-0.05582	0.0791528	0.0410021	-0.616568	0.438788	-0.011026	-7.16844e-09
-3.59547e-23	2.54265e-21	-4.92932e-17	4.56055e-17	5.2005e-17	-1.05613e-17	-5.37892e-16	2.38356e-16	-4.33915e-17	-5.40368e-16	2.14728e-16	-1.46425e-17	-8.60884e-16	5.55096e-16	-2.72985e-15	-5.10397e-16	-1.61013e-15	-4.51311e-15	-9.08877e-15	-4.92393e-15	-4.34066e-15	-3.48182e-15	7.92309e-15	-7.8965e-16	3.27341e-15	1.35473e-15	-9.56702e-15	-1.39151e-14	-5.21014e-15	1.23938e-14	-1.1298e-14	-1.53013e-14	-3.77083e-15	-1.02034e-14	7.03307e-15	-1.78981e-14	8.93346e-15	-1.25203e-14	1.39931e-14	-5.51702e-14	3.58753e-15	8.23378e-14	-6.04136e-14	2.20401e-14	1.42826e-14	4.86159e-13	-2.90326e-13	1.96826e-12	-5.43611e-11	0.000145855
-4.38735e-22	1.35559e-20	-2.91474e-16	2.64137e-16	3.08626e-16	-6.29551e-17	-3.16065e-15	1.41879e-15	-3.32487e-16	-3.13903e-15	1.27265e-15	-6.63726e-17	-5.13825e-15	3.19847e-15	-1.58485e-14	-3.08897e-15	-9.3278e-15	-2.63981e-14	-5.32115e-14	-2.89247e-14	-2.54084e-14	-2.03839e-14	4.62884e-14	-4.33212e-15	1.8831e-14	8.16691e-15	-5.6181e-14	-8.18305e-14	-3.3009e-14	7.43463e-14	-7.5251e-14	-8.83645e-14	-1.97288e-14	-6.84134e-14	3.98113e-14	-1.19252e-13	4.74603e-14	-8.54423e-14	8.13765e-14	-3.83985e-13	9.87368e-15	4.7304e-13	-3.67778e-13	1.25055e-13	7.97389e-14	3.02074e-12	-1.54247e-12	5.84935e-12	-3.71954e-10	0.000856222
-1.18168e-23	2.12122e-22	-1.35897e-17	1.24989e-17	1.43781e-17	-2.98517e-18	-1.46503e-16	6.63643e-17	-1.18015e-17	-1.48063e-16	5.90051e-17	-3.75238e-18	-2.36855e-16	1.45501e-16	-7.41285e-16	-1.46158e-16	-4.32217e-16	-1.23367e-15	-2.48522e-15	-1.3598e-15	-1.18524e-15	-9.47586e-16	2.15968e-15	-2.05766e-16	8.74091e-16	3.92296e-16	-2.62797e-15	-3.82465e-15	-1.52548e-15	3.40961e-15	-3.43886e-15	-4.10183e-15	-9.58164e-16	-3.1164e-15	1.84766e-15	-5.45413e-15	2.25215e-15	-3.87643e-15	3.76691e-15	-1.7335e-14	5.48621e-16	2.22285e-14	-1.69584e-14	5.77441e-15	3.71713e-15	1.40659e-13	-7.25185e-14	3.39832e-13	-1.6902e-11	4.00088e-05
-4.38735e-22	1.35559e-20	-2.91474e-16	2.64137e-16	3.08626e-16	-6.29551e-17	-3.16065e-15	1.41879e-15	-3.32487e-16	-3.13903e-15	1.27265e-15	-6.63726e-17	-5.13825e-15	3.19847e-15	-1.58485e-14	-3.08897e-15	-9.3278e-15	-2.63981e-14	-5.32115e-14	-2.89247e-14	-2.54084e-14	-2.03839e-14	4.62884e-14	-4.33212e-15	1.8831e-14	8.16691e-15	-5.6181e-14	-8.18305e-14	-3.3009e-14	7.43463e-14	-7.5251e-14	-8.83645e-14	-1.97288e-14	-6.84134e-14	3.98113e-14	-1.19252e-13	4.74603e-14	-8.54423e-14	8.13765e-14	-3.83985e-13	9.87368e-15	4.7304e-13	-3.67778e-13	1.25055e-13	7.97389e-14	3.02074e-12	-1.54247e-12	5.84935e-12	-3.71954e-10	0.000856222
3.63373e-10	-4.14157e-09	0.000133049	0.000138343	7.29612e-05	-4.98188e-05	-0.000478567	0.00103868	-0.000143386	0.00248702	0.000515566	0.00079595	0.00558994	0.00367456	-0.00574833	-0.0161589	-0.00871731	0.0297147	-0.00162365	0.061825	-0.0967819	0.0789918	0.0598358	0.00988443	-0.0940113	0.0480337	-0.10441	0.162304	0.0255073	0.0595519	-0.0173088	0.0197201	-0.173814	0.0906822	-0.293404	0.1279	-0.0713688	-0.0960671	-0.0182607	0.00823097	-0.242915	0.00645458	0.00811002	-0.00586817	0.0164757	0.0432537	0.0153617	0.0719403	-0.00190931	-1.16974e-09
-2.3011e-21	1.62851e-19	-4.98557e-15	4.50412e-15	5.2063e-15	-1.08666e-15	-5.38698e-14	2.42072e-14	-6.11265e-15	-5.46061e-14	2.16917e-14	-1.59344e-15	-8.28229e-14	5.17131e-14	-2.691e-13	-5.44751e-14	-1.56878e-13	-4.47788e-13	-8.96531e-13	-4.91682e-13	-4.33502e-13	-3.38122e-13	7.88748e-13	-7.06494e-14	3.1753e-13	1.52368e-13	-9.27998e-13	-1.35894e-12	-5.12759e-13	1.19094e-12	-1.13204e-12	-1.46705e-12	-3.87154e-13	-9.89337e-13	6.80716e-13	-1.73045e-12	9.13848e-13	-1.22355e-12	1.34444e-12	-5.40993e-12	3.45031e-13	8.18967e-12	-5.97458e-12	2.2169e-12	1.38509e-12	4.69461e-11	-2.79629e-11	2.00715e-10	-5.40007e-09	0.0144774
3.63373e-10	-4.14157e-09	0.000133049	0.000138343	7.29612e-05	-4.98188e-05	-0.000478567	0.00103868	-0.000143386	0.00248702	0.000515566	0.00079595	0.00558994	0.00367456	-0.00574833	-0.0161589	-0.00871731	0.0297147	-0.00162365	0.061825	-0.0967819	0.0789918	0.0598358	0.00988443	-0.0940113	0.0480337	-0.10441	0.162304	0.0255073	0.0595519	-0.0173088	0.0197201	-0.173814	0.0906822	-0.293404	0.1279	-0.0713688	-0.0960671	-0.0182607	0.00823097	-0.242915	0.00645458	0.00811002	-0.00586817	0.0164757	0.0432537	0.0153617	0.0719403	-0.00190931	-1.16974e-09
-3.27065e-21	2.71281e-19	-5.10916e-15	4.67376e-15	5.37267e-15	-1.10259e-15	-5.54752e-14	2.49278e-14	-5.12257e-15	-5.59277e-14	2.23334e-14	-1.63381e-15	-8.77036e-14	5.25887e-14	-2.76418e-13	-5.43036e-14	-1.60333e-13	-4.6138e-13	-9.32485e-13	-5.05799e-13	-4.47643e-13	-3.45303e-13	8.11474e-13	-7.90338e-14	3.28549e-13	1.53064e-13	-9.64626e-13	-1.43153e-12	-5.78879e-13	1.28206e-12	-1.26677e-12	-1.55598e-12	-3.63497e-13	-1.1525e-12	6.79823e-13	-1.98152e-12	8.9513e-13	-1.40938e-12	1.39076e-12	-6.38896e-12	2.30545e-13	8.33454e-12	-6.36452e-12	2.2125e-12	1.41702e-12	5.13926e-11	-2.61343e-11	1.28191e-10	-6.30588e-09	0.0149528
0.408248	3.17148e-05	0.0981448	0.0905547	0.106207	0.896245	-0.0297864	0.00802214	0.00302979	0.00136761	0.000898587	0.00102323	1.17013e-05	0.000202829	0.000174179	-0.000362308	-0.000106369	0.000364377	-0.000253757	6.61101e-05	-4.38159e-05	-1.96597e-05	4.71717e-05	3.59165e-05	6.77244e-05	-1.4645e-05	0.000101536	-8.73201e-05	4.6738e-05	2.09604e-05	9.8499e-07	1.08523e-05	4.46693e-05	-8.50195e-06	2.46929e-05	1.04705e-06	-1.02807e-05	8.42239e-06	-1.06916e-05	8.047e-07	-6.02225e-06	5.46774e-07	-2.95389e-06	1.55411e-06	-1.5228e-06	3.90866e-07	1.64937e-07	-1.32454e-08	-1.43447e-09	-8.71849e-14
-0.408248	-3.12853e-05	-0.737418	0.482398	0.12206	0.204072	0.0164334	-0.00232566	0.0019239	-0.00175031	-0.00314132	0.00182026	0.000850572	-0.000569082	0.000295326	-0.000348517	-0.000167558	8.96846e-05	3.89036e-05	-5.77548e-05	-7.75312e-05	0.000164957	6.07503e-05	0.000146493	-2.26824e-05	0.000101147	-2.3075e-05	1.55116e-05	-8.07132e-06	5.39669e-06	-1.57605e-05	1.61461e-05	-9.888e-06	-7.19271e-06	4.69913e-06	-2.30281e-06	-1.24953e-05	-3.88316e-06	-1.04015e-05	-2.2174e-06	-6.48066e-06	-3.96494e-08	-1.18057e-06	3.64086e-07	-8.86338e-07	1.98412e-07	4.17507e-08	-8.30401e-10	-4.92076e-10	-3.56363e-13
-8.991e-09	-2.32611e-06	0.036403	0.0468703	0.0198522	-0.00493232	0.185228	0.00714132	0.0224226	-0.0535417	-0.0311951	-0.0299758	-0.321276	0.189671	0.0554424	0.0930232	-0.0278432	0.00669825	-0.00779806	-0.00151597	-0.0331795	0.0269016	-0.0161951	0.00389073	-0.0158361	-0.0453695	0.0112294	0.00167253	-0.00167922	0.00720089	-0.00212912	-0.00549081	0.00425021	0.000664143	-0.00168758	-0.000874896	-0.000793089	0.00111925	0.000604999	-0.000313325	-0.000157134	-0.000175226	-0.00028094	-0.000360828	-0.000141282	1.93843e-05	9.98068e-06	3.48881e-06	-3.49346e-07	-0.00558344
8.74369e-11	-4.5388e-08	0.000198636	0.000503707	0.00074983	-0.000333462	-0.00191853	0.00355341	-0.000723671	0.00871622	0.000524109	-0.00213663	0.0181568	0.0689508	-0.0866584	-0.0405463	-0.0233678	0.0273172	0.0131368	-0.0154918	0.0499784	-0.0477192	-0.0590433	-0.00919594	0.0884327	-0.0640237	0.191387	-0.252747	-0.0703682	-0.111955	-0.108226	-0.0822238	0.0152327	-0.0119774	-0.0945114	0.116342	-0.115541	-0.0531398	-0.0365171	-0.0247551	-0.177064	-0.0216486	0.101296	0.217678	-0.245783	0.00343929	0.00350529	6.90164e-05	6.60977e-06	-0.0112254
-2.73489e-05	0.408203	-0.0259417	-0.0838868	0.168876	-0.00651045	0.0965553	0.0387329	0.00403831	-0.0507356	0.149684	0.510864	0.0038929	0.0114897	0.00278152	-0.00771531	-0.00747747	-0.00381916	0.000717783	-1.60695e-05	0.00176742	-2.90118e-05	-0.00124696	0.00226493	0.0011598	-0.000234268	0.000252176	-0.000473377	-0.000600747	0.000131939	0.000432816	0.000138733	0.000157461	6.6463e-05	-1.88898e-05	4.71267e-05	-8.23106e-05	-1.25461e-06	3.56555e-05	3.23256e-05	2.15135e-05	3.0872e-06	-1.76135e-05	7.57489e-06	-4.81228e-07	-1.06017e-06	-2.61504e-08	1.68016e-08	1.09119e-07	0.00199588
2.73355e-05	-0.408217	0.0430626	0.0956875	-0.147574	0.00627152	0.116982	0.0402553	-0.0132555	-0.0431844	0.107774	0.326806	0.0574672	0.0269272	-0.00964697	-0.041362	-0.019596	0.00761481	0.179395	-0.259104	-0.0679017	0.0330287	0.0106121	0.741874	0.0471057	0.0136018	-0.021444	-0.00541445	0.00404819	-0.00152512	-0.00825891	0.00128108	0.00126754	0.00108844	0.000244693	-0.000584882	0.0010477	0.00074192	3.96552e-05	-0.000289097	-0.000292803	-0.000178863	0.000210165	8.87626e-05	-0.000100133	-1.89113e-05	-1.70711e-05	-6.66718e-07	-1.11714e-07	1.38966e-12
-9.49399e-20	6.07512e-18	-9.56833e-14	8.65372e-14	1.0042e-13	-2.0921e-14	-1.03396e-12	4.65986e-13	-1.10996e-13	-1.03663e-12	4.15748e-13	-2.94965e-14	-1.64073e-12	1.05515e-12	-5.21896e-12	-1.01587e-12	-3.08307e-12	-8.62149e-12	-1.73047e-11	-9.47067e-12	-8.36028e-12	-6.62292e-12	1.52303e-11	-1.48795e-12	6.20141e-12	2.54035e-12	-1.83481e-11	-2.66508e-11	-1.04922e-11	2.33739e-11	-2.28954e-11	-2.83807e-11	-7.03366e-12	-1.99632e-11	1.32184e-11	-3.63153e-11	1.70994e-11	-2.51446e-11	2.66292e-11	-1.13527e-10	5.83688e-12	1.57839e-10	-1.17636e-10	4.17505e-11	2.62289e-11	9.3136e-10	-5.16235e-10	3.13823e-09	-1.11858e-07	0.27935
-3.66163e-26	6.92636e-21	-1.58134e-13	1.44266e-13	1.66456e-13	-3.3735e-14	-1.72265e-12	7.67478e-13	-1.60009e-13	-1.71774e-12	6.88093e-13	-4.12903e-14	-2.77445e-12	1.65295e-12	-8.52664e-12	-1.68161e-12	-4.95685e-12	-1.4209e-11	-2.87257e-11	-1.5619e-11	-1.38006e-11	-1.08057e-11	2.50233e-11	-2.22122e-12	1.01038e-11	4.72195e-12	-3.01093e-11	-4.39065e-11	-1.79636e-11	4.00824e-11	-4.04265e-11	-4.74842e-11	-1.0954e-11	-3.71791e-11	2.05091e-11	-6.22477e-11	2.62772e-11	-4.52716e-11	4.21608e-11	-2.04236e-10	4.9571e-12	2.55042e-10	-1.99935e-10	6.86343e-11	4.33297e-11	1.61898e-09	-7.98712e-10	3.25379e-09	-2.02032e-07	0.465007
0	0	0	0	0	0	0	0	0	0	0	0	0	0	0	0	0	0	0	0	0	0	0	0	0	0	0	0	0	0	0	0	0	0	0	0	0	0	0	0	0	0	0	0	0	0	0	0	0	0
3.91005e-10	-1.37776e-07	0.00864461	0.0114599	0.00652364	-0.0019704	0.00764194	-0.0611571	-0.0124279	-0.0607576	-0.0207536	0.00292379	0.0476388	0.000561841	0.0537096	0.0102002	0.0336241	-0.0433632	-0.0664939	-0.0379463	-0.048989	-0.00294888	-0.0186393	-0.00486726	0.0052605	0.0280266	-0.00386455	-0.160169	0.0602438	0.369366	0.137809	-0.189409	0.445879	0.598014	-0.0720331	-0.0558668	-0.0364471	0.369051	0.0503497	-0.0210982	-0.206034	0.0178962	0.0618496	-0.0063271	0.0380575	0.00345105	-0.000788904	-0.000144784	-1.48529e-05	2.0086e-11
1.31675e-09	-2.21389e-07	0.0100333	0.0135636	0.00803767	-0.00256741	0.00755683	-0.0513973	-0.0172746	-0.0585703	-0.0158954	0.00134341	0.024552	0.00391111	0.00321486	0.0020483	-0.0341161	0.00455966	-0.0402441	-0.0135635	0.0133331	0.00495316	0.0409113	-0.00792142	-0.0221074	-0.0576466	-0.136497	-0.0789572	0.0541482	0.0443127	-0.550246	0.314052	0.0528301	0.150382	0.0966854	-0.0320732	0.0936804	-0.0475062	0.0360628	0.0523992	-0.0372	-0.00215551	-0.0114186	-0.0042799	-0.00552181	-2.95234e-05	-0.0004624	-1.23951e-05	-3.064e-06	-3.32922e-11
1.31675e-09	-2.21389e-07	0.0100333	0.0135636	0.00803767	-0.00256741	0.00755683	-0.0513973	-0.0172746	-0.0585703	-0.0158954	0.00134341	0.024552	0.00391111	0.00321486	0.0020483	-0.0341161	0.00455966	-0.0402441	-0.0135635	0.0133331	0.00495316	0.0409113	-0.00792142	-0.0221074	-0.0576466	-0.136497	-0.0789572	0.0541482	0.0443127	-0.550246	0.314052	0.0528301	0.150382	0.0966854	-0.0320732	0.0936804	-0.0475062	0.0360628	0.0523992	-0.0372	-0.00215551	-0.0114186	-0.0042799	-0.00552181	-2.95234e-05	-0.0004624	-1.23951e-05	-3.06403e-06	-3.31196e-11
1.23519e-09	-2.21465e-07	0.00992514	0.0134139	0.00789138	-0.00251907	0.00750012	-0.0522439	-0.0165363	-0.0586674	-0.016508	0.00125959	0.0210804	0.00725411	0.000495016	-0.00661175	-0.0390967	0.0213734	-0.0428496	-0.0153301	0.0148798	0.0158504	0.0211558	-0.00114788	-0.00967741	-0.0267437	-0.0592016	-0.00681552	0.0478414	-0.0598591	-0.115446	0.0490306	-0.337932	-0.204597	0.063994	0.269155	-0.118761	0.82464	0.1249	-0.120066	-0.0466922	0.0187579	0.0154428	-0.0386566	-0.0191867	0.0035884	4.82153e-05	-3.97552e-05	-2.52389e-05	1.65605e-11
1.23534e-09	-3.27764e-07	0.0190455	0.0255911	0.0148493	-0.00461773	0.0154254	-0.109821	-0.0295419	-0.122116	-0.0349523	0.00484799	0.0553109	-0.00927657	0.0414552	0.0176652	0.0314394	0.0228378	-0.112773	-0.0668287	0.012127	-0.000712978	0.0282847	0.00994854	-0.121984	-0.142697	-0.0299387	-0.104281	-0.0467155	-0.237535	0.0443695	-0.252984	-0.576515	0.515582	0.301631	-0.214715	-0.123472	-0.084311	-0.0924243	0.0303867	0.0626245	-0.0330386	-0.0257715	0.0103252	-0.000231101	-0.00499708	0.000474595	-1.00077e-05	2.15986e-05	2.37301e-11
1.21322e-08	-1.03132e-06	0.0442989	0.0609954	0.0360762	-0.0123223	0.0251279	-0.171424	-0.0382722	-0.245661	-0.0602884	0.00659115	-0.209144	-0.260685	-0.216079	-0.209653	-0.030257	-0.010447	0.0689564	0.0338731	0.0563678	-0.0397971	-0.00392276	0.000884023	0.0378601	0.117892	-0.016862	0.00023223	-0.00362267	-0.00731056	0.0253249	0.00397614	0.00657501	0.000959731	-0.00729592	-0.00532112	0.00494217	-0.0112533	-0.00150395	0.0010549	-0.00409688	0.000191591	0.000737164	0.0013871	0.00115035	-0.000119446	-2.06842e-05	-2.88462e-06	-4.5977e-08	-4.49889e-13
1.21322e-08	-1.03132e-06	0.0442989	0.0609954	0.0360762	-0.0123223	0.0251279	-0.171424	-0.0382722	-0.245661	-0.0602884	0.00659115	-0.209144	-0.260685	-0.216079	-0.209653	-0.030257	-0.010447	0.0689564	0.0338731	0.0563678	-0.0397971	-0.00392276	0.000884023	0.0378601	0.117892	-0.016862	0.00023223	-0.00362267	-0.00731056	0.0253249	0.00397614	0.00657501	0.000959731	-0.00729592	-0.00532112	0.00494217	-0.0112533	-0.00150395	0.0010549	-0.00409688	0.000191591	0.000737164	0.0013871	0.00115035	-0.000119446	-2.06842e-05	-2.88461e-06	-4.5979e-08	-4.0861e-13
1.21322e-08	-1.03132e-06	0.0442989	0.0609954	0.0360762	-0.0123223	0.0251279	-0.171424	-0.0382722	-0.245661	-0.0602884	0.00659115	-0.209144	-0.260685	-0.216079	-0.209653	-0.030257	-0.010447	0.0689564	0.0338731	0.0563678	-0.0397971	-0.00392276	0.000884023	0.0378601	0.117892	-0.016862	0.00023223	-0.00362267	-0.00731056	0.0253249	0.00397614	0.00657501	0.000959731	-0.00729592	-0.00532112	0.00494217	-0.0112533	-0.00150395	0.0010549	-0.00409688	0.000191591	0.000737164	0.0013871	0.00115035	-0.000119446	-2.06842e-05	-2.88461e-06	-4.60304e-08	-4.50826e-13
2.98063e-09	-2.22499e-07	0.00165983	0.00319996	0.00395756	-0.00193966	-0.0117895	0.0227715	-0.0043599	0.0553017	0.00548987	-0.00602387	0.119742	0.363792	-0.469248	-0.30095	-0.173216	0.311715	0.0615549	0.328414	-0.355517	0.248344	0.12428	0.0181765	-0.133161	-0.0689369	0.0488457	-0.0617544	0.0476994	0.0602168	0.0650263	0.0154147	0.0476413	-0.00558403	0.184624	-0.102062	0.0409072	0.0494265	-0.0288835	0.00464981	0.071417	0.00199252	-0.00710308	-0.0077073	0.00429588	-0.000930754	0.000879479	-4.48592e-06	-2.62654e-08	-7.67101e-12
-0.408248	-2.50985e-05	0.198412	-0.11379	-0.012186	0.175577	-0.0208618	0.14255	-0.0368626	-0.0479238	-0.235905	0.0553951	0.0148013	-0.00333042	-0.000703261	-0.000150505	-0.00121578	0.000826101	-7.67259e-05	-0.000415638	-0.00165958	-0.00149926	-0.00140551	-0.00015775	0.00142939	-0.000597086	-0.0010097	0.000441931	0.000616143	-0.000714342	5.98282e-05	-0.000196957	0.000186078	-0.000126852	-9.49941e-05	5.81754e-05	8.92683e-05	-4.63088e-05	-9.45363e-05	5.45035e-06	-6.37865e-05	-8.68023e-06	2.9211e-05	8.34687e-06	5.5923e-06	-1.27793e-06	-1.76595e-06	1.06605e-07	1.20413e-06	-1.02194e-08
3.63373e-10	-4.14157e-09	0.000133049	0.000138343	7.29612e-05	-4.98188e-05	-0.000478567	0.00103868	-0.000143386	0.00248702	0.000515566	0.00079595	0.00558994	0.00367456	-0.00574833	-0.0161589	-0.00871731	0.0297147	-0.00162365	0.061825	-0.0967819	0.0789918	0.0598358	0.00988443	-0.0940113	0.0480337	-0.10441	0.162304	0.0255073	0.0595519	-0.0173088	0.0197201	-0.173814	0.0906822	-0.293404	0.1279	-0.0713688	-0.0960671	-0.0182607	0.00823097	-0.242915	0.00645458	0.00811002	-0.00586817	0.0164757	0.0432537	0.0153617	0.0719403	-0.00190931	-1.16974e-09
8.74369e-11	-4.5388e-08	0.000198636	0.000503707	0.00074983	-0.000333462	-0.00191853	0.00355341	-0.000723671	0.00871622	0.000524109	-0.00213663	0.0181568	0.0689508	-0.0866584	-0.0405463	-0.0233678	0.0273172	0.0131368	-0.0154918	0.0499784	-0.0477192	-0.0590433	-0.00919594	0.0884327	-0.0640237	0.191387	-0.252747	-0.0703682	-0.111955	-0.108226	-0.0822238	0.0152327	-0.0119774	-0.0945114	0.116342	-0.115541	-0.0531398	-0.0365171	-0.0247551	-0.177064	-0.0216486	0.101296	0.217678	-0.245783	0.00343929	0.00350529	6.90167e-05	6.60112e-06	0.0108041
5.97557e-10	-3.46123e-09	0.000282305	0.000394888	0.000308029	-0.00021665	-0.000521582	0.00310691	0.0167887	-0.00585201	3.05836e-07	-0.000657826	-0.00602982	-0.0116409	-0.0174205	-0.00523965	-0.0189303	-0.0281999	-0.0873686	-0.0437011	-0.0428257	-0.028252	0.0769156	-0.00111584	0.0155093	-0.00382971	-0.0681385	-0.13215	-0.050037	0.1272	-0.0531442	-0.175282	-0.0399262	-0.0876674	0.0419713	0.06224	0.134598	-0.0641948	0.0261878	-0.148003	-0.0189246	0.040798	-0.0458918	-0.0289857	0.0453602	-0.392274	0.176501	0.391701	-0.0100122	-3.55652e-09
-7.59429e-23	2.03532e-20	-4.61368e-16	4.23413e-16	4.84483e-16	-9.84897e-17	-4.9507e-15	2.24696e-15	-4.36902e-16	-5.0374e-15	1.99666e-15	-1.43637e-16	-7.86897e-15	4.84285e-15	-2.49693e-14	-4.82106e-15	-1.44948e-14	-4.1949e-14	-8.4593e-14	-4.61776e-14	-4.04441e-14	-3.14382e-14	7.37014e-14	-7.05596e-15	2.99918e-14	1.48097e-14	-8.83234e-14	-1.29781e-13	-4.94267e-14	1.1572e-13	-1.10477e-13	-1.40232e-13	-3.47761e-14	-9.92544e-14	6.45026e-14	-1.75751e-13	8.11011e-14	-1.2502e-13	1.29107e-13	-5.46193e-13	2.69649e-14	7.52091e-13	-5.5848e-13	1.97605e-13	1.25102e-13	4.71034e-12	-2.60418e-12	1.57281e-11	-5.36595e-10	0.00134781
-4.74761e-10	3.54227e-09	-0.000223687	-0.000323537	-0.000239245	0.000173497	0.000395623	-0.00250519	-0.0138546	0.00501781	1.27832e-05	0.000584577	0.0054341	0.00940648	0.0162872	0.00357756	0.0130357	0.020263	0.069018	0.0349253	0.0338724	0.0219232	-0.0573032	0.000126174	-0.00810714	0.00232368	0.0666791	0.128629	0.0404502	-0.142555	0.0043262	0.208105	0.0646811	0.08548	-0.0187373	-0.247062	-0.177982	-0.0504971	0.0612535	-0.887478	-0.048759	0.00363723	0.0022613	0.00670639	0.02024	-0.0144637	0.0044677	-0.000113418	1.91009e-06	-3.9007e-10
4.84774e-22	-5.42669e-20	1.18115e-15	-1.08258e-15	-1.25205e-15	2.62557e-16	1.28428e-14	-5.83956e-15	1.14726e-15	1.29749e-14	-5.16167e-15	3.50593e-16	2.0343e-14	-1.25892e-14	6.47269e-14	1.21903e-14	3.82117e-14	1.06884e-13	2.16342e-13	1.17283e-13	1.04026e-13	8.15208e-14	-1.89314e-13	1.73217e-14	-7.74539e-14	-3.29488e-14	2.25414e-13	3.30479e-13	1.31083e-13	-3.02775e-13	2.92394e-13	3.6102e-13	8.37865e-14	2.71338e-13	-1.56697e-13	4.52113e-13	-2.02302e-13	3.26366e-13	-3.19083e-13	1.47048e-12	-4.86723e-14	-1.91395e-12	1.47429e-12	-5.18365e-13	-3.3473e-13	-1.18078e-11	6.11503e-12	-2.94852e-11	1.45734e-09	-0.0034681
4.84774e-22	-5.42669e-20	1.18511e-15	-1.08719e-15	-1.24803e-15	2.62935e-16	1.28531e-14	-5.84178e-15	1.16763e-15	1.30542e-14	-5.16284e-15	4.04166e-16	2.00976e-14	-1.26384e-14	6.48996e-14	1.214e-14	3.80691e-14	1.0698e-13	2.16294e-13	1.17567e-13	1.0341e-13	8.15826e-14	-1.87897e-13	1.74656e-14	-7.72486e-14	-3.32813e-14	2.26238e-13	3.29471e-13	1.30902e-13	-3.03753e-13	2.93438e-13	3.62545e-13	8.40476e-14	2.70828e-13	-1.56155e-13	4.53359e-13	-2.03209e-13	3.2657e-13	-3.19451e-13	1.47639e-12	-4.76567e-14	-1.92213e-12	1.48207e-12	-5.16561e-13	-3.32122e-13	-1.18273e-11	6.06708e-12	-2.90365e-11	1.46029e-09	-0.0034681
4.84774e-22	-5.42669e-20	1.18115e-15	-1.08258e-15	-1.25205e-15	2.62557e-16	1.28428e-14	-5.83956e-15	1.14726e-15	1.29749e-14	-5.16167e-15	3.50593e-16	2.0343e-14	-1.25892e-14	6.47269e-14	1.21903e-14	3.82117e-14	1.06884e-13	2.16342e-13	1.17283e-13	1.04026e-13	8.15208e-14	-1.89314e-13	1.73217e-14	-7.74539e-14	-3.29488e-14	2.25414e-13	3.30479e-13	1.31083e-13	-3.02775e-13	2.92394e-13	3.6102e-13	8.37865e-14	2.71338e-13	-1.56697e-13	4.52113e-13	-2.02302e-13	3.26366e-13	-3.19083e-13	1.47048e-12	-4.86723e-14	-1.91395e-12	1.47429e-12	-5.18365e-13	-3.3473e-13	-1.18078e-11	6.11503e-12	-2.94852e-11	1.45734e-09	-0.0034681
4.84774e-22	-5.42669e-20	1.18511e-15	-1.08719e-15	-1.24803e-15	2.62935e-16	1.28531e-14	-5.84178e-15	1.16763e-15	1.30542e-14	-5.16284e-15	4.04166e-16	2.00976e-14	-1.26384e-14	6.48996e-14	1.214e-14	3.80691e-14	1.0698e-13	2.16294e-13	1.17567e-13	1.0341e-13	8.15826e-14	-1.87897e-13	1.74656e-14	-7.72486e-14	-3.32813e-14	2.26238e-13	3.29471e-13	1.30902e-13	-3.03753e-13	2.93438e-13	3.62545e-13	8.40476e-14	2.70828e-13	-1.56155e-13	4.53359e-13	-2.03209e-13	3.2657e-13	-3.19451e-13	1.47639e-12	-4.76567e-14	-1.92213e-12	1.48207e-12	-5.16561e-13	-3.32122e-13	-1.18273e-11	6.06708e-12	-2.90365e-11	1.46029e-09	-0.0034681
4.84774e-22	-5.42669e-20	1.18115e-15	-1.08258e-15	-1.25205e-15	2.62557e-16	1.28428e-14	-5.83956e-15	1.14726e-15	1.29749e-14	-5.16167e-15	3.50593e-16	2.0343e-14	-1.25892e-14	6.47269e-14	1.21903e-14	3.82117e-14	1.06884e-13	2.16342e-13	1.17283e-13	1.04026e-13	8.15208e-14	-1.89314e-13	1.73217e-14	-7.74539e-14	-3.29488e-14	2.25414e-13	3.30479e-13	1.31083e-13	-3.02775e-13	2.92394e-13	3.6102e-13	8.37865e-14	2.71338e-13	-1.56697e-13	4.52113e-13	-2.02302e-13	3.26366e-13	-3.19083e-13	1.47048e-12	-4.86723e-14	-1.91395e-12	1.47429e-12	-5.18365e-13	-3.3473e-13	-1.18078e-11	6.11503e-12	-2.94852e-11	1.45734e-09	-0.0034681
4.84774e-22	-5.42669e-20	1.18511e-15	-1.08719e-15	-1.24803e-15	2.62935e-16	1.28531e-14	-5.84178e-15	1.16763e-15	1.30542e-14	-5.16284e-15	4.04166e-16	2.00976e-14	-1.26384e-14	6.48996e-14	1.214e-14	3.80691e-14	1.0698e-13	2.16294e-13	1.17567e-13	1.0341e-13	8.15826e-14	-1.87897e-13	1.74656e-14	-7.72486e-14	-3.32813e-14	2.26238e-13	3.29471e-13	1.30902e-13	-3.03753e-13	2.93438e-13	3.62545e-13	8.40476e-14	2.70828e-13	-1.56155e-13	4.53359e-13	-2.03209e-13	3.2657e-13	-3.19451e-13	1.47639e-12	-4.76567e-14	-1.92213e-12	1.48207e-12	-5.16561e-13	-3.32122e-13	-1.18273e-11	6.06708e-12	-2.90365e-11	1.46029e-09	-0.0034681
4.84774e-22	-5.42669e-20	1.18115e-15	-1.08258e-15	-1.25205e-15	2.62557e-16	1.28428e-14	-5.83956e-15	1.14726e-15	1.29749e-14	-5.16167e-15	3.50593e-16	2.0343e-14	-1.25892e-14	6.47269e-14	1.21903e-14	3.82117e-14	1.06884e-13	2.16342e-13	1.17283e-13	1.04026e-13	8.15208e-14	-1.89314e-13	1.73217e-14	-7.74539e-14	-3.29488e-14	2.25414e-13	3.30479e-13	1.31083e-13	-3.02775e-13	2.92394e-13	3.6102e-13	8.37865e-14	2.71338e-13	-1.56697e-13	4.52113e-13	-2.02302e-13	3.26366e-13	-3.19083e-13	1.47048e-12	-4.86723e-14	-1.91395e-12	1.47429e-12	-5.18365e-13	-3.3473e-13	-1.18078e-11	6.11503e-12	-2.94852e-11	1.45734e-09	-0.0034681
4.84774e-22	-5.42669e-20	1.18511e-15	-1.08719e-15	-1.24803e-15	2.62935e-16	1.28531e-14	-5.84178e-15	1.16763e-15	1.30542e-14	-5.16284e-15	4.04166e-16	2.00976e-14	-1.26384e-14	6.48996e-14	1.214e-14	3.80691e-14	1.0698e-13	2.16294e-13	1.17567e-13	1.0341e-13	8.15826e-14	-1.87897e-13	1.74656e-14	-7.72486e-14	-3.32813e-14	2.26238e-13	3.29471e-13	1.30902e-13	-3.03753e-13	2.93438e-13	3.62545e-13	8.40476e-14	2.70828e-13	-1.56155e-13	4.53359e-13	-2.03209e-13	3.2657e-13	-3.19451e-13	1.47639e-12	-4.76567e-14	-1.92213e-12	1.48207e-12	-5.16561e-13	-3.32122e-13	-1.18273e-11	6.06708e-12	-2.90365e-11	1.46029e-09	-0.0034681
-8.3222e-23	3.39422e-21	-1.98523e-16	1.80051e-16	2.09899e-16	-4.34333e-17	-2.163e-15	9.64137e-16	-2.24089e-16	-2.14457e-15	8.66107e-16	-4.93704e-17	-3.48556e-15	2.20124e-15	-1.09124e-14	-2.22349e-15	-6.38529e-15	-1.8187e-14	-3.64324e-14	-1.99176e-14	-1.74312e-14	-1.41005e-14	3.20759e-14	-2.95916e-15	1.30873e-14	5.64151e-15	-3.81223e-14	-5.58319e-14	-2.3446e-14	5.08154e-14	-5.16157e-14	-5.96036e-14	-1.37678e-14	-4.68072e-14	2.67368e-14	-8.16514e-14	3.34654e-14	-5.82988e-14	5.47111e-14	-2.64433e-13	6.52041e-15	3.21572e-13	-2.51003e-13	8.46629e-14	5.4743e-14	2.07174e-12	-9.96327e-13	3.80184e-12	-2.58664e-10	0.00058477
-1.48308e-11	1.63816e-09	-0.000184791	-0.000243307	-0.000142435	5.08349e-05	-0.000149773	0.00109457	-0.000246872	0.00150093	0.000449502	-1.94839e-06	-0.00147157	-0.000405306	0.000158029	0.00082805	-0.00152358	-0.00353148	0.00217825	0.00117428	0.0014109	-0.00454877	0.000821974	0.000630832	-0.00599281	-0.00310988	-0.00309879	0.0092533	0.0032224	-0.0228396	-0.00394992	-0.000223664	-0.0126095	-0.00747271	0.0186402	-0.0169983	0.0220294	-0.0164078	-0.0130751	0.00466389	-0.00283085	0.183935	0.384428	-0.12447	0.0112958	-0.0146873	0.000681396	0.000278367	-4.70462e-05	1.19879e-10
1.48344e-21	-9.49013e-20	1.41666e-15	-1.31259e-15	-1.50077e-15	3.02959e-16	1.55048e-14	-7.00281e-15	1.30236e-15	1.55632e-14	-6.21968e-15	4.22129e-16	2.46768e-14	-1.53291e-14	7.8386e-14	1.53599e-14	4.60971e-14	1.29855e-13	2.60881e-13	1.42802e-13	1.24732e-13	9.9886e-14	-2.27104e-13	2.13574e-14	-9.21944e-14	-3.90217e-14	2.74205e-13	3.97093e-13	1.56858e-13	-3.56468e-13	3.47821e-13	4.32558e-13	1.0297e-13	3.16193e-13	-1.90489e-13	5.48958e-13	-2.44136e-13	3.86282e-13	-3.93543e-13	1.73765e-12	-7.29091e-14	-2.34563e-12	1.79165e-12	-6.38268e-13	-3.89832e-13	-1.4321e-11	7.62185e-12	-4.13752e-11	1.74208e-09	-0.00420818
1.48344e-21	-9.49013e-20	1.4275e-15	-1.31492e-15	-1.50586e-15	3.12752e-16	1.556e-14	-6.96384e-15	1.37403e-15	1.55714e-14	-6.24578e-15	3.9502e-16	2.51219e-14	-1.58014e-14	7.85114e-14	1.51735e-14	4.59883e-14	1.29949e-13	2.61868e-13	1.4282e-13	1.25718e-13	9.98794e-14	-2.28635e-13	2.07649e-14	-9.33584e-14	-3.85053e-14	2.75669e-13	3.97496e-13	1.54529e-13	-3.59929e-13	3.49832e-13	4.26526e-13	1.04557e-13	3.12952e-13	-1.93644e-13	5.45844e-13	-2.47058e-13	3.8859e-13	-3.92389e-13	1.73937e-12	-7.02564e-14	-2.33254e-12	1.78002e-12	-6.29116e-13	-3.94701e-13	-1.42422e-11	7.61489e-12	-4.32542e-11	1.72956e-09	-0.00420818
1.48344e-21	-9.49013e-20	1.41666e-15	-1.31259e-15	-1.50077e-15	3.02959e-16	1.55048e-14	-7.00281e-15	1.30236e-15	1.55632e-14	-6.21968e-15	4.22129e-16	2.46768e-14	-1.53291e-14	7.8386e-14	1.53599e-14	4.60971e-14	1.29855e-13	2.60881e-13	1.42802e-13	1.24732e-13	9.9886e-14	-2.27104e-13	2.13574e-14	-9.21944e-14	-3.90217e-14	2.74205e-13	3.97093e-13	1.56858e-13	-3.56468e-13	3.47821e-13	4.32558e-13	1.0297e-13	3.16193e-13	-1.90489e-13	5.48958e-13	-2.44136e-13	3.86282e-13	-3.93543e-13	1.73765e-12	-7.29091e-14	-2.34563e-12	1.79165e-12	-6.38268e-13	-3.89832e-13	-1.4321e-11	7.62185e-12	-4.13752e-11	1.74208e-09	-0.00420818
-1.48308e-11	1.63816e-09	-0.000184791	-0.000243307	-0.000142435	5.08349e-05	-0.000149773	0.00109457	-0.000246872	0.00150093	0.000449502	-1.94839e-06	-0.00147157	-0.000405306	0.000158029	0.00082805	-0.00152358	-0.00353148	0.00217825	0.00117428	0.0014109	-0.00454877	0.000821974	0.000630832	-0.00599281	-0.00310988	-0.00309879	0.0092533	0.0032224	-0.0228396	-0.00394992	-0.000223664	-0.0126095	-0.00747271	0.0186402	-0.0169983	0.0220294	-0.0164078	-0.0130751	0.00466389	-0.00283085	0.183935	0.384428	-0.12447	0.0112958	-0.0146873	0.000681396	0.000278367	-4.70462e-05	1.19879e-10
9.05008e-23	1.35945e-20	-8.99865e-16	8.14605e-16	9.41672e-16	-1.96723e-16	-9.76098e-15	4.30709e-15	-1.02919e-15	-9.73491e-15	3.88535e-15	-2.29721e-16	-1.55965e-14	1.01515e-14	-4.91222e-14	-9.58941e-15	-2.88227e-14	-8.12264e-14	-1.6295e-13	-8.95549e-14	-7.74044e-14	-6.31785e-14	1.41542e-13	-1.39772e-14	5.80475e-14	2.42016e-14	-1.70564e-13	-2.51189e-13	-9.79086e-14	2.24226e-13	-2.17053e-13	-2.71554e-13	-6.49354e-14	-1.94411e-13	1.21025e-13	-3.39948e-13	1.58654e-13	-2.43798e-13	2.4593e-13	-1.08818e-12	4.72073e-14	1.47391e-12	-1.10906e-12	3.93552e-13	2.43755e-13	8.86108e-12	-4.78313e-12	2.79004e-11	-1.07304e-09	0.00263079
-8.3222e-23	3.39422e-21	-2.00542e-16	1.82051e-16	2.10112e-16	-4.45866e-17	-2.16214e-15	9.51395e-16	-2.15604e-16	-2.15888e-15	8.69215e-16	-4.88538e-17	-3.52452e-15	2.23044e-15	-1.0883e-14	-2.17551e-15	-6.3453e-15	-1.81127e-14	-3.63421e-14	-1.99721e-14	-1.73761e-14	-1.4051e-14	3.17996e-14	-2.89802e-15	1.29982e-14	5.57709e-15	-3.82602e-14	-5.59376e-14	-2.20797e-14	5.04281e-14	-5.07623e-14	-5.94812e-14	-1.39813e-14	-4.57378e-14	2.70707e-14	-7.97741e-14	3.32449e-14	-5.7397e-14	5.4954e-14	-2.56154e-13	7.36935e-15	3.22297e-13	-2.49023e-13	8.47628e-14	5.44e-14	2.05067e-12	-1.0481e-12	4.74303e-12	-2.48482e-10	0.00058477
9.05008e-23	1.35945e-20	-8.99865e-16	8.14605e-16	9.41672e-16	-1.96723e-16	-9.76098e-15	4.30709e-15	-1.02919e-15	-9.73491e-15	3.88535e-15	-2.29721e-16	-1.55965e-14	1.01515e-14	-4.91222e-14	-9.58941e-15	-2.88227e-14	-8.12264e-14	-1.6295e-13	-8.95549e-14	-7.74044e-14	-6.31785e-14	1.41542e-13	-1.39772e-14	5.80475e-14	2.42016e-14	-1.70564e-13	-2.51189e-13	-9.79086e-14	2.24226e-13	-2.17053e-13	-2.71554e-13	-6.49354e-14	-1.94411e-13	1.21025e-13	-3.39948e-13	1.58654e-13	-2.43798e-13	2.4593e-13	-1.08818e-12	4.72073e-14	1.47391e-12	-1.10906e-12	3.93552e-13	2.43755e-13	8.86108e-12	-4.78313e-12	2.79004e-11	-1.07304e-09	0.00263079
-1.48308e-11	1.63816e-09	-0.000184791	-0.000243307	-0.000142435	5.08349e-05	-0.000149773	0.00109457	-0.000246872	0.00150093	0.000449502	-1.94839e-06	-0.00147157	-0.000405306	0.000158029	0.00082805	-0.00152358	-0.00353148	0.00217825	0.00117428	0.0014109	-0.00454877	0.000821974	0.000630832	-0.00599281	-0.00310988	-0.00309879	0.0092533	0.0032224	-0.0228396	-0.00394992	-0.000223664	-0.0126095	-0.00747271	0.0186402	-0.0169983	0.0220294	-0.0164078	-0.0130751	0.00466389	-0.00283085	0.183935	0.384428	-0.12447	0.0112958	-0.0146873	0.000681396	0.000278367	-4.70462e-05	1.19879e-10
1.48344e-21	-9.49013e-20	1.41666e-15	-1.31259e-15	-1.50077e-15	3.02959e-16	1.55048e-14	-7.00281e-15	1.30236e-15	1.55632e-14	-6.21968e-15	4.22129e-16	2.46768e-14	-1.53291e-14	7.8386e-14	1.53599e-14	4.60971e-14	1.29855e-13	2.60881e-13	1.42802e-13	1.24732e-13	9.9886e-14	-2.27104e-13	2.13574e-14	-9.21944e-14	-3.90217e-14	2.74205e-13	3.97093e-13	1.56858e-13	-3.56468e-13	3.47821e-13	4.32558e-13	1.0297e-13	3.16193e-13	-1.90489e-13	5.48958e-13	-2.44136e-13	3.86282e-13	-3.93543e-13	1.73765e-12	-7.29091e-14	-2.34563e-12	1.79165e-12	-6.38268e-13	-3.89832e-13	-1.4321e-11	7.62185e-12	-4.13752e-11	1.74208e-09	-0.00420818
1.48344e-21	-9.49013e-20	1.4275e-15	-1.31492e-15	-1.50586e-15	3.12752e-16	1.556e-14	-6.96384e-15	1.37403e-15	1.55714e-14	-6.24578e-15	3.9502e-16	2.51219e-14	-1.58014e-14	7.85114e-14	1.51735e-14	4.59883e-14	1.29949e-13	2.61868e-13	1.4282e-13	1.25718e-13	9.98794e-14	-2.28635e-13	2.07649e-14	-9.33584e-14	-3.85053e-14	2.75669e-13	3.97496e-13	1.54529e-13	-3.59929e-13	3.49832e-13	4.26526e-13	1.04557e-13	3.12952e-13	-1.93644e-13	5.45844e-13	-2.47058e-13	3.8859e-13	-3.92389e-13	1.73937e-12	-7.02564e-14	-2.33254e-12	1.78002e-12	-6.29116e-13	-3.94701e-13	-1.42422e-11	7.61489e-12	-4.32542e-11	1.72956e-09	-0.00420818
1.48344e-21	-9.49013e-20	1.41666e-15	-1.31259e-15	-1.50077e-15	3.02959e-16	1.55048e-14	-7.00281e-15	1.30236e-15	1.55632e-14	-6.21968e-15	4.22129e-16	2.46768e-14	-1.53291e-14	7.8386e-14	1.53599e-14	4.60971e-14	1.29855e-13	2.60881e-13	1.42802e-13	1.24732e-13	9.9886e-14	-2.27104e-13	2.13574e-14	-9.21944e-14	-3.90217e-14	2.74205e-13	3.97093e-13	1.56858e-13	-3.56468e-13	3.47821e-13	4.32558e-13	1.0297e-13	3.16193e-13	-1.90489e-13	5.48958e-13	-2.44136e-13	3.86282e-13	-3.93543e-13	1.73765e-12	-7.29091e-14	-2.34563e-12	1.79165e-12	-6.38268e-13	-3.89832e-13	-1.4321e-11	7.62185e-12	-4.13752e-11	1.74208e-09	-0.00420818
1.48344e-21	-9.49013e-20	1.4275e-15	-1.31492e-15	-1.50586e-15	3.12752e-16	1.556e-14	-6.96384e-15	1.37403e-15	1.55714e-14	-6.24578e-15	3.9502e-16	2.51219e-14	-1.58014e-14	7.85114e-14	1.51735e-14	4.59883e-14	1.29949e-13	2.61868e-13	1.4282e-13	1.25718e-13	9.98794e-14	-2.28635e-13	2.07649e-14	-9.33584e-14	-3.85053e-14	2.75669e-13	3.97496e-13	1.54529e-13	-3.59929e-13	3.49832e-13	4.26526e-13	1.04557e-13	3.12952e-13	-1.93644e-13	5.45844e-13	-2.47058e-13	3.8859e-13	-3.92389e-13	1.73937e-12	-7.02564e-14	-2.33254e-12	1.78002e-12	-6.29116e-13	-3.94701e-13	-1.42422e-11	7.61489e-12	-4.32542e-11	1.72956e-09	-0.00420818
-2.4821e-21	1.35575e-19	-2.06403e-15	1.89172e-15	2.16305e-15	-4.38246e-16	-2.23057e-14	9.95087e-15	-2.09293e-15	-2.24394e-14	8.96577e-15	-5.5312e-16	-3.57841e-14	2.29437e-14	-1.13072e-13	-2.30401e-14	-6.73047e-14	-1.85924e-13	-3.73668e-13	-2.0297e-13	-1.80835e-13	-1.4649e-13	3.31451e-13	-2.93864e-14	1.34771e-13	5.24894e-14	-3.88072e-13	-5.75429e-13	-2.34531e-13	5.17719e-13	-5.18177e-13	-6.14821e-13	-1.42123e-13	-4.70756e-13	2.7388e-13	-7.93638e-13	3.48953e-13	-5.76913e-13	5.6006e-13	-2.61038e-12	7.84927e-14	3.31876e-12	-2.6019e-12	9.18872e-13	5.87603e-13	2.01573e-11	-1.03335e-11	4.68584e-11	-2.56395e-09	0.00604487
-1.48308e-11	1.63816e-09	-0.000184791	-0.000243307	-0.000142435	5.08349e-05	-0.000149773	0.00109457	-0.000246872	0.00150093	0.000449502	-1.94839e-06	-0.00147157	-0.000405306	0.000158029	0.00082805	-0.00152358	-0.00353148	0.00217825	0.00117428	0.0014109	-0.00454877	0.000821974	0.000630832	-0.00599281	-0.00310988	-0.00309879	0.0092533	0.0032224	-0.0228396	-0.00394992	-0.000223664	-0.0126095	-0.00747271	0.0186402	-0.0169983	0.0220294	-0.0164078	-0.0130751	0.00466389	-0.00283085	0.183935	0.384428	-0.12447	0.0112958	-0.0146873	0.000681396	0.000278367	-4.70462e-05	1.19879e-10
-1.75239e-08	-1.74802e-06	0.022749	0.0260153	0.00780465	0.000225782	0.165436	-0.1262	0.0709271	0.191146	-0.12001	0.0333532	0.0741447	0.00907336	-0.15649	0.0288994	-0.0599898	-0.17124	-0.0247351	0.00947814	-0.0350317	-0.0460017	-0.146357	0.000174353	-0.0914932	0.00232398	0.0194509	-0.139634	0.329581	-0.205548	0.0484892	0.100041	-0.0796388	0.0608026	-0.367102	-0.111019	0.0702407	0.0373467	0.0128125	0.0736261	0.025563	0.0842464	-0.0619525	-0.0631437	0.0793659	0.173847	0.0725329	0.301869	-0.00798899	-4.8736e-09
-7.75122e-09	6.02523e-07	-0.043967	-0.058867	-0.0342782	0.0108594	0.00162247	0.429072	-0.0226919	0.0678289	0.220905	-0.0925999	-0.130683	-0.0218791	-0.0895836	-0.169388	-0.0549747	0.0220396	0.00152722	0.0146727	0.0049841	-0.0626921	-0.0394881	-0.00902438	0.0702686	0.176611	0.0144252	-0.0353027	-0.15228	-0.00172517	-0.167253	-0.084047	-0.0943521	0.256396	-0.281406	0.0646683	-0.116733	0.0112375	0.406348	-0.00330558	0.494884	0.0678928	0.0140125	0.0122859	0.0232234	-0.00205861	0.000506051	0.000241979	1.72535e-05	-4.60604e-11
2.57571e-08	1.05819e-06	0.0221267	0.034221	0.0275991	-0.0115038	-0.167233	-0.302086	-0.0480031	-0.244861	-0.102642	0.059023	0.0828052	0.0868452	0.147445	0.0788045	0.0844798	0.213233	0.0273758	0.0282959	-0.0385493	0.153656	0.174463	0.0076723	0.0294257	-0.166485	0.00101699	0.177607	-0.184332	0.194513	-0.0577975	-0.102919	-0.0137224	-0.010747	-0.158549	0.211694	-0.134606	-0.140683	0.194163	-0.0498873	0.142031	-0.00699305	0.0548382	0.0445819	-0.0256421	-0.0837758	-0.0358151	-0.146378	0.00388548	2.45918e-09
-8.17661e-22	6.78175e-20	-1.01782e-15	9.31301e-16	1.0743e-15	-2.18039e-16	-1.10018e-14	4.92861e-15	-8.96165e-16	-1.10692e-14	4.39546e-15	-2.54837e-16	-1.7836e-14	1.13683e-14	-5.59997e-14	-1.07121e-14	-3.29641e-14	-9.28465e-14	-1.87047e-13	-1.01969e-13	-8.88445e-14	-7.15798e-14	1.62279e-13	-1.54821e-14	6.69831e-14	2.81756e-14	-1.97589e-13	-2.86696e-13	-1.16249e-13	2.60583e-13	-2.57935e-13	-3.10883e-13	-7.13433e-14	-2.36598e-13	1.39226e-13	-4.17673e-13	1.69671e-13	-2.93598e-13	2.868e-13	-1.31821e-12	4.2281e-14	1.66103e-12	-1.27889e-12	4.33564e-13	2.74349e-13	1.07363e-11	-5.37747e-12	2.32061e-11	-1.29643e-09	0.00299813
-2.91161e-23	-6.78418e-20	1.28689e-15	-1.17102e-15	-1.348e-15	2.87804e-16	1.3874e-14	-6.19194e-15	1.34742e-15	1.4038e-14	-5.5773e-15	3.96702e-16	2.19694e-14	-1.36775e-14	6.95097e-14	1.32923e-14	4.05466e-14	1.15314e-13	2.33293e-13	1.25463e-13	1.11883e-13	8.71624e-14	-2.02793e-13	1.95023e-14	-8.29321e-14	-3.64403e-14	2.41431e-13	3.58139e-13	1.40786e-13	-3.25041e-13	3.11745e-13	3.9302e-13	9.07725e-14	2.89926e-13	-1.71916e-13	4.83493e-13	-2.19352e-13	3.52164e-13	-3.49023e-13	1.56741e-12	-5.65781e-14	-2.06578e-12	1.58768e-12	-5.55779e-13	-3.60061e-13	-1.28407e-11	6.71523e-12	-3.49374e-11	1.54926e-09	-0.00374361
-2.91161e-23	-6.78418e-20	1.27622e-15	-1.1679e-15	-1.34708e-15	2.83555e-16	1.39066e-14	-6.19649e-15	1.21876e-15	1.39676e-14	-5.5584e-15	3.62258e-16	2.23261e-14	-1.3379e-14	6.90157e-14	1.34966e-14	4.01834e-14	1.14818e-13	2.32492e-13	1.26572e-13	1.11938e-13	8.63427e-14	-2.03121e-13	1.93132e-14	-8.21539e-14	-3.76756e-14	2.41884e-13	3.57876e-13	1.44127e-13	-3.20272e-13	3.14379e-13	3.87494e-13	9.09827e-14	2.87581e-13	-1.691e-13	4.87808e-13	-2.21863e-13	3.50844e-13	-3.44576e-13	1.57882e-12	-5.84488e-14	-2.07984e-12	1.58938e-12	-5.60423e-13	-3.5115e-13	-1.27864e-11	6.63396e-12	-3.36716e-11	1.56783e-09	-0.00374361
1.04027e-22	-4.23709e-21	7.46344e-17	-6.85018e-17	-7.86613e-17	1.61233e-17	8.06056e-16	-3.62582e-16	6.93816e-17	8.14524e-16	-3.24771e-16	2.10638e-17	1.28922e-15	-8.38155e-16	4.09466e-15	7.75584e-16	2.42236e-15	6.75159e-15	1.36312e-14	7.38344e-15	6.52275e-15	5.20143e-15	-1.19151e-14	1.12276e-15	-4.87696e-15	-1.98369e-15	1.44508e-14	2.08971e-14	8.61989e-15	-1.91388e-14	1.90719e-14	2.27867e-14	5.04946e-15	1.74808e-14	-1.00567e-14	3.05074e-14	-1.22117e-14	2.16426e-14	-2.08894e-14	9.80078e-14	-2.65007e-15	-1.21348e-13	9.46898e-14	-3.21769e-14	-2.02873e-14	-7.72347e-13	3.70697e-13	-1.47651e-12	9.63113e-11	-0.000218782
-7.24007e-22	-1.08613e-19	3.49494e-15	-3.17586e-15	-3.68819e-15	7.68947e-16	3.81068e-14	-1.71028e-14	3.89308e-15	3.80797e-14	-1.51449e-14	9.59517e-16	6.03665e-14	-3.79101e-14	1.91996e-13	3.85088e-14	1.12258e-13	3.17999e-13	6.37895e-13	3.49767e-13	3.08642e-13	2.44362e-13	-5.62982e-13	5.08249e-14	-2.26974e-13	-1.004e-13	6.66172e-13	9.79351e-13	3.71461e-13	-8.56808e-13	8.30105e-13	1.03854e-12	2.64158e-13	7.35493e-13	-4.77633e-13	1.28587e-12	-6.19609e-13	9.10285e-13	-9.59898e-13	4.04041e-12	-2.10979e-13	-5.7452e-12	4.30211e-12	-1.55729e-12	-9.70673e-13	-3.40084e-11	1.95139e-11	-1.25215e-10	4.02267e-09	-0.0102855
-2.91161e-23	-6.78418e-20	1.28689e-15	-1.17102e-15	-1.348e-15	2.87804e-16	1.3874e-14	-6.19194e-15	1.34742e-15	1.4038e-14	-5.5773e-15	3.96702e-16	2.19694e-14	-1.36775e-14	6.95097e-14	1.32923e-14	4.05466e-14	1.15314e-13	2.33293e-13	1.25463e-13	1.11883e-13	8.71624e-14	-2.02793e-13	1.95023e-14	-8.29321e-14	-3.64403e-14	2.41431e-13	3.58139e-13	1.40786e-13	-3.25041e-13	3.11745e-13	3.9302e-13	9.07725e-14	2.89926e-13	-1.71916e-13	4.83493e-13	-2.19352e-13	3.52164e-13	-3.49023e-13	1.56741e-12	-5.65781e-14	-2.06578e-12	1.58768e-12	-5.55779e-13	-3.60061e-13	-1.28407e-11	6.71523e-12	-3.49374e-11	1.54926e-09	-0.00374361
-2.91161e-23	-6.78418e-20	1.27622e-15	-1.1679e-15	-1.34708e-15	2.83555e-16	1.39066e-14	-6.19649e-15	1.21876e-15	1.39676e-14	-5.5584e-15	3.62258e-16	2.23261e-14	-1.3379e-14	6.90157e-14	1.34966e-14	4.01834e-14	1.14818e-13	2.32492e-13	1.26572e-13	1.11938e-13	8.63427e-14	-2.03121e-13	1.93132e-14	-8.21539e-14	-3.76756e-14	2.41884e-13	3.57876e-13	1.44127e-13	-3.20272e-13	3.14379e-13	3.87494e-13	9.09827e-14	2.87581e-13	-1.691e-13	4.87808e-13	-2.21863e-13	3.50844e-13	-3.44576e-13	1.57882e-12	-5.84488e-14	-2.07984e-12	1.58938e-12	-5.60423e-13	-3.5115e-13	-1.27864e-11	6.63396e-12	-3.36716e-11	1.56783e-09	-0.00374361
[truncated: 73 more rows]
[truncated: 161 more columns]

## Sheet: Yeast_reactions
ASPTA
ASPKi
ASNS1
ASADi
ALATA_Lm
ALATA_L
PC
ICL
P5CR
ORNTACim
OCBTi
GLU5K
G5SD
[truncated: 198 more rows]
